# Supplementary material for: A multi-hierarchical approach reveals d-serine as a hidden substrate of sodium-coupled monocarboxylate transporters
Source: eLife journal article supplement (doi:10.7554/elife.92615), 2023-11-13

Figure 3

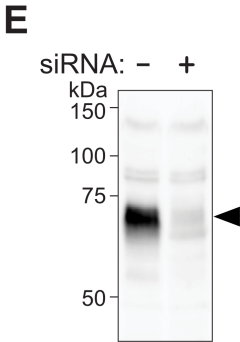

Source data

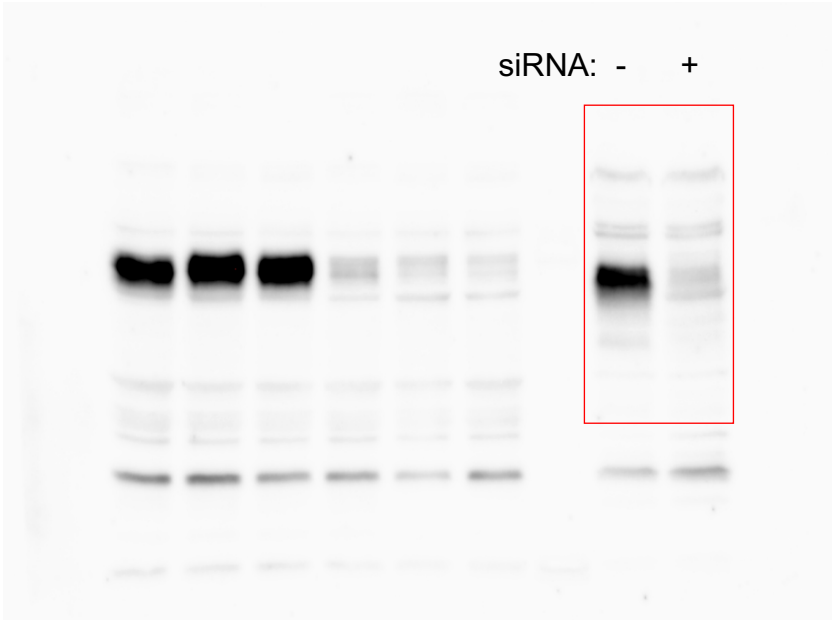

Supplement: fig3-data2 [file elife-92615-fig3-data2-v1.pdf]
