# Supplementary material for: A multi-hierarchical approach reveals d-serine as a hidden substrate of sodium-coupled monocarboxylate transporters
Source: eLife. 2024 Apr 23;12:RP92615. doi: 10.7554/eLife.92615 (PMC11037918; doi:10.7554/eLife.92615)
Supplement: Supplementary file 1. [file elife-92615-supp1.xlsx]

## Sheet: Table Supplement 1
Accession	Description	Entrez Gene Name	Symbol	Localization	Type(s)	TMHMM	Exp. q-value: Combined	Sum PEP Score	Coverage [%]	# Peptides	# PSMs	# Unique Peptides	# Protein Groups	# AAs	MW [kDa]	calc. pI	Score Mascot: Mascot	# Peptides (by Search Engine): Mascot	# Razor Peptides	Abundance Ratio 4h/sham	Abundance Ratio 8h/sham	p-value 4h/sham	p-value 8h/sham	Adjusted abundances: Sham Rep1	Adjusted abundances: Sham Rep2	Adjusted abundances: Sham Rep3	Adjusted abundances; 4h-IRI Rep1	Adjusted abundances; 4h-IRI Rep2	Adjusted abundances; 4h-IRI Rep3	Adjusted abundances; 8h-IRI Rep1	Adjusted abundances; 8h-IRI Rep2	Adjusted abundances; 8h-IRI Rep3	Abundances (Normalized): F1+F10: Sham Rep1	Abundances (Normalized): F4+F13: Sham Rep2	Abundances (Normalized): F7+16: Sham Rep3	Abundances (Normalized): F2+F11: 4h-IRI Rep1	Abundances (Normalized): F5+F14: 4h-IRI Rep2	Abundances (Normalized): F8+F17: 4h-IRI Rep3	Abundances (Normalized): F3+F12: 8h-IRI Rep1	Abundances (Normalized): F6+F15: 8h-IRI Rep2	Abundances (Normalized): F9+F18: 8h-IRI Rep3
Q922Q1	Mitochondrial amidoxime reducing component 2 OS=Mus musculus OX=10090 GN=Marc2 PE=1 SV=1	mitochondrial amidoxime reducing component 2	MARC2	Cytoplasm	enzyme	1	0	348.451	72	23	622	23	1	338	38.2	8.68	8003	23	0	0.846	0.829	0.100094	0.357242	107.9	131.5	108.9	92.1	101.4	59.1	90.2	126.8	82.2	8.04137e+08	9.77558e+08	8.10128e+08	6.85136e+08	7.53937e+08	4.40096e+08	6.71226e+08	9.43041e+08	6.11391e+08
Q9DBD0	Inhibitor of carbonic anhydrase OS=Mus musculus OX=10090 GN=Ica PE=1 SV=1	RIKEN cDNA 1300017J02 gene	1300017J02Rik	Extracellular Space	other	0	0	36.154	12	5	11	4	1	700	76.7	7.25	132	5	0	7.512	18.521	0.004343	0.144691	11	23.9	5.5	99	63.2	82.3	202.8	23	389.3	227127	504159	112124	2.02898e+06	1.2939e+06	1.72082e+06	4.12782e+06	776825	7.94702e+06
Q5YD48	APOBEC1 complementation factor OS=Mus musculus OX=10090 GN=A1cf PE=1 SV=2	APOBEC1 complementation factor	A1CF	Nucleus	other	0	0	40.921	11	6	38	5	1	595	65.6	8.59	575	6	0	1.055	0.979	0.808123	0.346338	81.7	146.6	89.7	94.6	182.1	71.9	87.8	100.5	45.3	1.32042e+07	2.35256e+07	1.4503e+07	1.51911e+07	2.92316e+07	1.21513e+07	1.41562e+07	1.61646e+07	7.29171e+06
P58742	Aladin OS=Mus musculus OX=10090 GN=Aaas PE=1 SV=1	aladin WD repeat nucleoporin	AAAS	Nucleus	other	0	0.001	8.192	3	1	2	1	1	546	59.4	6.87	21	1	0	1.18	1.119	0.483135	0.62936	91.5	55	126.5	107.9	108.5	104.5	102.4	109.2	94.4	567304	322248	741636	629005	633105	617491	596708	637644	550856
Q9D2R0	Acetoacetyl-CoA synthetase OS=Mus musculus OX=10090 GN=Aacs PE=1 SV=1	acetoacetyl-CoA synthetase	AACS	Cytoplasm	enzyme	0	0	186.473	43	22	349	22	1	672	75.2	6.71	5009	22	0	1.522	1.334	0.009149	0.184939	77.2	77.8	83.6	102.5	118.4	128.4	130.7	77.9	103.8	1.85694e+08	1.87245e+08	2.01174e+08	2.46641e+08	2.85052e+08	3.09003e+08	3.14605e+08	1.8743e+08	2.49891e+08
Q99PG0	Arylacetamide deacetylase OS=Mus musculus OX=10090 GN=Aadac PE=1 SV=3	arylacetamide deacetylase	AADAC	Cytoplasm	enzyme	0	0	312.712	61	22	302	22	1	398	45.2	7.49	2118	22	0	1.041	0.991	0.346441	0.622809	101	85.5	102.2	105.8	105.2	97.1	114.2	100.1	88.9	2.55765e+08	2.16698e+08	2.58766e+08	2.67626e+08	2.66425e+08	2.45874e+08	2.8891e+08	2.53312e+08	2.24966e+08
Q9WVM8	Kynurenine/alpha-aminoadipate aminotransferase, mitochondrial OS=Mus musculus OX=10090 GN=Aadat PE=1 SV=1	aminoadipate aminotransferase	AADAT	Cytoplasm	enzyme	0	0	182.321	35	11	234	11	1	425	47.6	8.25	2729	11	0	1.236	1.244	0.587174	0.232688	96.5	87.5	88	118.5	70.9	108.8	109.4	133.4	87	1.02117e+08	9.26138e+07	9.32454e+07	1.25687e+08	7.52197e+07	1.15059e+08	1.15842e+08	1.42674e+08	9.20606e+07
Q3UHJ0	AP2-associated protein kinase 1 OS=Mus musculus OX=10090 GN=Aak1 PE=1 SV=2	AP2 associated kinase 1	AAK1	Cytoplasm	kinase	0	0	59.291	6	4	22	4	1	959	103.3	6.7	278	4	0	1.169	1.06	0.528717	0.755672	70.1	123.2	80.5	94.2	154	82.4	85.4	127.9	82.4	5.42628e+06	9.72603e+06	6.19869e+06	7.22839e+06	1.20734e+07	6.39072e+06	6.55411e+06	1.0116e+07	6.32724e+06
Q6PIU9	Uncharacterized protein FLJ45252 homolog OS=Mus musculus OX=10090 PE=1 SV=2	AP2 associated kinase 1	AAK1	Cytoplasm	kinase	0	0.001	6.699	5	1	1	1	1	354	37.7	5.07	14	1	0	present in sham only	present in sham only	0.528717	0.755672	231	427	242							2.09425e+06	3.87022e+06	2.19412e+06
Q8BGQ7	Alanine--tRNA ligase, cytoplasmic OS=Mus musculus OX=10090 GN=Aars PE=1 SV=1	alanyl-tRNA synthetase 1	AARS1	Cytoplasm	enzyme	0	0	99.868	11	8	111	8	1	968	106.8	5.67	2946	8	0	1.351	1.36	0.015867	0.025289	81.8	86.8	66.5	110.5	128.9	106.6	111.2	95.9	111.7	2.19619e+07	2.34742e+07	1.788e+07	2.97039e+07	3.45452e+07	2.87125e+07	3.03864e+07	2.5741e+07	2.99702e+07
Q3THG9	Alanyl-tRNA editing protein Aarsd1 OS=Mus musculus OX=10090 GN=Aarsd1 PE=1 SV=2	alanyl-tRNA synthetase domain containing 1	AARSD1	Nucleus	enzyme	0	0	22.961	11	4	21	4	1	412	44.9	6.42	155	4	0	1.609	1.784	0.020859	0.074181	66.9	78.8	70.1	99.4	112.8	139.2	125.1	79.3	128.3	4.55021e+06	5.28561e+06	4.70826e+06	6.72541e+06	7.59033e+06	9.34845e+06	8.42107e+06	5.32137e+06	8.61284e+06
Q99K67	Alpha-aminoadipic semialdehyde synthase, mitochondrial OS=Mus musculus OX=10090 GN=Aass PE=1 SV=1	aminoadipate-semialdehyde synthase	AASS	Cytoplasm	enzyme	0	0	366.258	50	30	527	30	1	926	102.9	6.87	5076	30	0	1.07	0.973	0.676912	0.409529	99.2	92	134.4	106.2	64.8	124.9	109.6	96.6	72.3	1.65879e+08	1.53858e+08	2.24652e+08	1.77508e+08	1.08359e+08	2.08672e+08	1.83146e+08	1.61581e+08	1.21167e+08
P61922	4-aminobutyrate aminotransferase, mitochondrial OS=Mus musculus OX=10090 GN=Abat PE=1 SV=1	4-aminobutyrate aminotransferase	ABAT	Cytoplasm	enzyme	0	0	257.383	53	16	302	15	1	500	56.4	8.09	2629	16	1	0.907	0.997	0.353544	0.517898	115.9	96.6	107.9	97.8	70.5	110.8	107.6	107.7	85.3	1.11724e+08	9.28685e+07	1.03823e+08	9.40414e+07	6.80963e+07	1.06306e+08	1.04235e+08	1.03767e+08	8.22547e+07
P41233	ATP-binding cassette sub-family A member 1 OS=Mus musculus OX=10090 GN=Abca1 PE=1 SV=4	ATP binding cassette subfamily A member 1	ABCA1	Plasma Membrane	transporter	13	0.047	2.196	1	1	1	1	1	2261	253.7	6.81	0	1	0	0.805	0.593	0.818603	0.81936	158.1	12.7	168.1	103.8		156	85.7	93.7	121.9	425948	33539.8	445111	277337		419628	234646	248194	323915
Q5SSE9	ATP-binding cassette sub-family A member 13 OS=Mus musculus OX=10090 GN=Abca13 PE=2 SV=1	ATP binding cassette subfamily A member 13	ABCA13	Extracellular Space	transporter	13	0	35.029	1	4	25	4	1	5034	568.5	6.52	428	4	0	0.589	0.825	0.09652	0.109887	114	115.2	126.8	67.8	114.7	61.9	88.7	95	115.9	1.03136e+07	1.04121e+07	1.1472e+07	6.12999e+06	1.03717e+07	5.60037e+06	8.02032e+06	8.58889e+06	1.048e+07
P41234	ATP-binding cassette sub-family A member 2 OS=Mus musculus OX=10090 GN=Abca2 PE=1 SV=4	ATP binding cassette subfamily A member 2	ABCA2	Plasma Membrane	transporter	9	0.004	4.738	1	1	2	1	1	2434	270.3	6.76	29	1	0	1.349	1.338	0.643404	0.251727	76.5	61.3	118.2	110.7	103.1	73	156.3	98.7	102.3	328110	258077	462118	463607	403386	297119	643590	427045	410106
Q8R420	ATP-binding cassette sub-family A member 3 OS=Mus musculus OX=10090 GN=Abca3 PE=1 SV=3	ATP binding cassette subfamily A member 3	ABCA3	Plasma Membrane	transporter	9	0	615.212	38	57	860	57	1	1704	191.8	7.17	14629	57	0	0.621	0.7	0.01825	0.109908	112.9	159.4	127.1	67.8	79	84.1	88.9	118.1	62.6	7.06898e+08	9.97179e+08	7.94655e+08	4.24322e+08	4.94201e+08	5.26087e+08	5.56452e+08	7.39141e+08	3.91509e+08
Q8K448	ATP-binding cassette sub-family A member 5 OS=Mus musculus OX=10090 GN=Abca5 PE=1 SV=2	ATP binding cassette subfamily A member 5	ABCA5	Plasma Membrane	transporter	15	0	17.028	2	2	4	2	1	1642	185.8	7.2	60	2	0	0.937	1.102	0.322759	0.55831	103	93.5	112.5	96.5	62.1	103.4	113.6	122.4	92.8	1.00557e+06	914972	1.11026e+06	946165	622271	1.01342e+06	1.11798e+06	1.24511e+06	908399
Q91V24	ATP-binding cassette sub-family A member 7 OS=Mus musculus OX=10090 GN=Abca7 PE=1 SV=1	ATP binding cassette subfamily A member 7	ABCA7	Plasma Membrane	transporter	11	0	10.36	2	4	20	3	1	2159	236.7	7.28	154	4	0	1.388	1.677	0.064379	0.017822	73	70.9	61.2	98.4	116	78.2	118.9	116.3	167.2	1.28035e+06	1.24466e+06	1.07807e+06	1.73512e+06	2.03512e+06	1.37383e+06	2.08623e+06	2.03873e+06	2.93612e+06
Q8K440	ATP-binding cassette sub-family A member 8-B OS=Mus musculus OX=10090 GN=Abca8b PE=1 SV=2	ATP binding cassette subfamily A member 8	ABCA8	Plasma Membrane	transporter	13	0	24.675	2	2	19	2	1	1620	182.9	7.18	501	2	0	1.071	1.064	0.986339	0.639062	94.3	80.7	118.5	101	75.7	117.7	114.4	97.4	100.3	1.57025e+06	1.34436e+06	1.97477e+06	1.68214e+06	1.26154e+06	1.96012e+06	1.90496e+06	1.62209e+06	1.68043e+06
Q8K449	ATP-binding cassette sub-family A member 9 OS=Mus musculus OX=10090 GN=Abca9 PE=1 SV=2	ATP binding cassette subfamily A member 9	ABCA9	Cytoplasm	transporter	13	0	101.494	10	11	110	11	1	1623	183	6.93	1938	11	0	1.055	0.969	0.973925	0.908624	95.7	94.9	108.4	100.9	92.4	105.1	117.8	92	92.7	6.1156e+07	6.06531e+07	6.92762e+07	6.44737e+07	5.90609e+07	6.71568e+07	7.52732e+07	5.87525e+07	5.92556e+07
P21447	Multidrug resistance protein 1A OS=Mus musculus OX=10090 GN=Abcb1a PE=1 SV=3	ATP binding cassette subfamily B member 1	ABCB1	Plasma Membrane	transporter	11	0	299.362	22	21	349	20	1	1276	140.6	8.85	5092	21	1	0.67	0.983	0.001761	0.29699	129.8	117.3	111.9	79.6	78.6	72.3	115.3	116.5	78.6	1.51642e+08	1.37128e+08	1.3069e+08	9.29901e+07	9.18361e+07	8.44848e+07	1.34661e+08	1.36059e+08	9.18661e+07
Q9JI39	ATP-binding cassette sub-family B member 10, mitochondrial OS=Mus musculus OX=10090 GN=Abcb10 PE=1 SV=1	ATP binding cassette subfamily B member 10	ABCB10	Cytoplasm	transporter	5	0.012	3.687	3	1	1	1	1	715	77.1	9.6	0	1	0	0.559	1.206	0.412139	0.785378		72.8	208.2		57.9	81.8	148.5	111.9	218.9		173843	508979		138370	195440	354623	267393	522802
B5X0E4	ATP-binding cassette sub-family B member 5 OS=Mus musculus OX=10090 GN=Abcb5 PE=2 SV=1	ATP binding cassette subfamily B member 5	ABCB5	Plasma Membrane	transporter	9	0.019	3.028	2	1	1	1	1	1255	137.3	7.94	0	1	0
Q9DC29	ATP-binding cassette sub-family B member 6, mitochondrial OS=Mus musculus OX=10090 GN=Abcb6 PE=1 SV=1	ATP binding cassette subfamily B member 6 (Langereis blood group)	ABCB6	Cytoplasm	transporter	9	0	280.242	28	14	336	13	1	842	93.7	8.05	6044	14	0	0.698	0.761	0.079758	0.152228	109.4	111.4	139	77.7	72.7	107.7	84.8	116.2	81.1	1.74252e+08	1.78335e+08	2.21883e+08	1.23969e+08	1.17639e+08	1.72083e+08	1.35405e+08	1.85244e+08	1.29713e+08
Q61102	ATP-binding cassette sub-family B member 7, mitochondrial OS=Mus musculus OX=10090 GN=Abcb7 PE=1 SV=3	ATP binding cassette subfamily B member 7	ABCB7	Cytoplasm	transporter	5	0	69.738	16	7	34	7	1	752	82.5	9.32	241	7	0	0.641	0.982	0.295116	0.97558	113.3	70.5	152.6	108.7	48.8	72.7	111.2	77.3	144.9	1.11598e+07	6.96471e+06	1.50375e+07	1.07178e+07	4.77142e+06	7.19557e+06	1.10269e+07	7.54024e+06	1.43282e+07
Q9CXJ4	ATP-binding cassette sub-family B member 8, mitochondrial OS=Mus musculus OX=10090 GN=Abcb8 PE=1 SV=1	ATP binding cassette subfamily B member 8	ABCB8	Cytoplasm	transporter	4	0	44.409	11	4	31	4	1	717	78	9.07	544	4	0	1.133	1.207	0.964336	0.633784	74.1	82.6	133.5	120.5	93.6	72.8	127.6	99.7	95.5	4.44015e+06	4.94172e+06	7.98836e+06	7.20523e+06	5.61254e+06	4.36014e+06	7.64768e+06	5.97092e+06	5.71293e+06
Q9JJ59	ATP-binding cassette sub-family B member 9 OS=Mus musculus OX=10090 GN=Abcb9 PE=2 SV=1	ATP binding cassette subfamily B member 9	ABCB9	Cytoplasm	transporter	7	0	59.779	12	5	128	4	1	762	83.9	7.62	1553	5	0	1.074	1.315	0.809773	0.99792	39.2	228.2	52.5	56.4	177.9	26.6	69.1	183.6	66.6	2.32917e+06	1.35472e+07	3.13535e+06	3.72801e+06	1.05849e+07	1.57982e+06	4.60734e+06	1.09264e+07	4.47884e+06
O35379	Multidrug resistance-associated protein 1 OS=Mus musculus OX=10090 GN=Abcc1 PE=1 SV=1	ATP binding cassette subfamily C member 1	ABCC1	Plasma Membrane	transporter	16	0	172.723	21	19	155	18	1	1528	171.1	7.36	1560	19	1	0.814	1.227	0.560572	0.006934	97.2	95.3	86.9	106.2	76.1	77.5	128.8	115.3	116.8	8.85755e+07	8.68357e+07	7.92266e+07	9.68206e+07	6.93226e+07	7.05971e+07	1.17376e+08	1.05088e+08	1.065e+08
Q8R4P9	Multidrug resistance-associated protein 7 OS=Mus musculus OX=10090 GN=Abcc10 PE=1 SV=1	ATP binding cassette subfamily C member 10	ABCC10	Plasma Membrane	transporter	17	0	183.885	11	13	190	13	1	1501	163.6	7.18	2677	13	0	0.626	0.703	0.015447	0.237333	105.5	141.8	128.4	63.7	80.3	83.2	90.2	129.4	77.4	4.82589e+07	6.48151e+07	5.89242e+07	2.91517e+07	3.67598e+07	3.80321e+07	4.1218e+07	5.91159e+07	3.54071e+07
Q8VI47	Canalicular multispecific organic anion transporter 1 OS=Mus musculus OX=10090 GN=Abcc2 PE=1 SV=2	ATP binding cassette subfamily C member 2	ABCC2	Plasma Membrane	transporter	16	0	1255.92	42	63	3156	63	1	1543	173.6	8.65	55054	63	0	0.667	0.866	0.001742	0.445969	127.5	114.6	112.1	76.4	65.6	77.1	99	128.4	99.3	4.1065e+09	3.68982e+09	3.61122e+09	2.46094e+09	2.11138e+09	2.48285e+09	3.18921e+09	4.13448e+09	3.19637e+09
B2RX12	Canalicular multispecific organic anion transporter 2 OS=Mus musculus OX=10090 GN=Abcc3 PE=1 SV=1	ATP binding cassette subfamily C member 3	ABCC3	Plasma Membrane	transporter	14	0.001	6.225	2	2	25	1	1	1523	169	7.06	210	2	0	1.048	1.02	0.720352	0.327004	89.8	58.6	97.6	143.1	94.1	44.4	195.6	85.1	91.6	150278	104976	164413	239528	158265	74511.7	326855	144889	158885
Q9R1X5	Multidrug resistance-associated protein 5 OS=Mus musculus OX=10090 GN=Abcc5 PE=1 SV=2	ATP binding cassette subfamily C member 5	ABCC5	Plasma Membrane	transporter	11	0.008	4.193	2	2	7	2	1	1436	161	8.6	25	2	0
Q9R1S7	Multidrug resistance-associated protein 6 OS=Mus musculus OX=10090 GN=Abcc6 PE=1 SV=3	ATP binding cassette subfamily C member 6	ABCC6	Plasma Membrane	transporter	14	0	25.402	3	3	18	3	1	1498	164.8	8.21	211	3	0	0.662	0.864	0.182055	0.186663	120.8	106.9	123.7	72.8	121.3	80	109	104.4	61.2	6.68333e+06	5.90218e+06	6.81968e+06	4.00611e+06	6.72168e+06	4.40151e+06	5.99737e+06	5.76172e+06	3.36933e+06
P48410	ATP-binding cassette sub-family D member 1 OS=Mus musculus OX=10090 GN=Abcd1 PE=1 SV=1	ATP binding cassette subfamily D member 1	ABCD1	Plasma Membrane	transporter	0	0	34.356	7	3	22	3	1	736	81.8	8.7	434	3	0	0.608	0.81	0.969721	0.645639	72.9	145.9	95.5	58.1	229.7	34.4	77.4	137.8	48.4	3.71967e+06	7.07832e+06	4.78733e+06	2.81764e+06	1.11094e+07	1.70564e+06	3.74637e+06	6.66702e+06	2.34904e+06
P55096	ATP-binding cassette sub-family D member 3 OS=Mus musculus OX=10090 GN=Abcd3 PE=1 SV=2	ATP binding cassette subfamily D member 3	ABCD3	Cytoplasm	transporter	3	0	761.377	53	30	1190	30	1	659	75.4	9.26	22196	30	0	1.016	1.015	0.788567	0.536294	99.9	76.2	110.2	101.5	138.7	66.1	107.1	101.4	98.8	6.62451e+08	5.05213e+08	7.30887e+08	6.72258e+08	9.19325e+08	4.38312e+08	7.09438e+08	6.7259e+08	6.55257e+08
O89016	ATP-binding cassette sub-family D member 4 OS=Mus musculus OX=10090 GN=Abcd4 PE=1 SV=2	ATP binding cassette subfamily D member 4	ABCD4	Cytoplasm	transporter	2	0	120.697	24	10	124	10	1	606	68.5	6.42	2406	10	0	0.715	0.824	0.046476	0.271231	96.5	125.1	128.7	74.5	89.5	89.4	103.1	113.1	80.1	4.09169e+07	5.33117e+07	5.49918e+07	3.15783e+07	3.79495e+07	3.81528e+07	4.38296e+07	4.84603e+07	3.40444e+07
P61222	ATP-binding cassette sub-family E member 1 OS=Mus musculus OX=10090 GN=Abce1 PE=1 SV=1	ATP binding cassette subfamily E member 1	ABCE1	Cytoplasm	transporter	0	0	96.186	24	11	94	11	1	599	67.3	8.34	949	11	0	1.18	1.077	0.174472	0.460985	89.4	96.9	84.4	134.7	105.6	93.5	115.9	96.3	83.3	2.93509e+07	3.17096e+07	2.76914e+07	4.40726e+07	3.4622e+07	3.07226e+07	3.79159e+07	3.15335e+07	2.72563e+07
Q6P542	ATP-binding cassette sub-family F member 1 OS=Mus musculus OX=10090 GN=Abcf1 PE=1 SV=1	ATP binding cassette subfamily F member 1	ABCF1	Cytoplasm	transporter	0	0	11.221	6	3	20	3	1	837	94.9	6.51	271	3	0	1.059	1.027	0.610936	0.574068	71	116	84.2	79	142.4	89.1	81.9	149.9	86.5	2.27074e+06	3.2575e+06	2.764e+06	2.67018e+06	3.97183e+06	2.79534e+06	2.86457e+06	4.23741e+06	2.78555e+06
Q99LE6	ATP-binding cassette sub-family F member 2 OS=Mus musculus OX=10090 GN=Abcf2 PE=1 SV=1	ATP binding cassette subfamily F member 2	ABCF2	Cytoplasm	transporter	0	0.001	7.441	4	2	10	2	1	628	71.7	7.05	87	2	0	1.76	1.091	0.028868	0.495336	96.6	74.1	60.1	130.4	105.7	135.4	154	63	80.8	3.98116e+06	3.13504e+06	2.98894e+06	5.29743e+06	4.41694e+06	5.47209e+06	6.27794e+06	2.9467e+06	3.58337e+06
Q7TMS5	ATP-binding cassette sub-family G member 2 OS=Mus musculus OX=10090 GN=Abcg2 PE=1 SV=1	ATP binding cassette subfamily G member 2 (Junior blood group)	ABCG2	Plasma Membrane	transporter	6	0	834.283	51	34	2715	34	1	657	72.9	8.54	51460	34	0	0.702	0.727	0.010062	0.273778	125.5	124.1	107	88.1	71.8	87.1	90.2	127.4	78.8	8.73232e+09	8.63838e+09	7.44437e+09	6.13735e+09	4.99515e+09	6.06355e+09	6.28044e+09	8.86938e+09	5.49217e+09
Q8K4F5	Protein ABHD11 OS=Mus musculus OX=10090 GN=Abhd11 PE=1 SV=1	abhydrolase domain containing 11	ABHD11	Cytoplasm	enzyme	0	0	22.024	21	2	15	2	1	307	33.5	9.61	61	2	0	0.969	1.058	0.653332	0.60979	131.5	30.3	105.8	110.2	102.6	99.2	120.1	112	88.3	2.70381e+06	631117	2.28119e+06	2.27126e+06	2.1087e+06	2.04366e+06	2.48114e+06	2.31767e+06	1.82691e+06
Q99LR1	Monoacylglycerol lipase ABHD12 OS=Mus musculus OX=10090 GN=Abhd12 PE=1 SV=2	abhydrolase domain containing 12	ABHD12	Plasma Membrane	enzyme	1	0	72.355	33	8	48	8	1	398	45.2	8.72	798	8	0	1.155	1.277	0.388073	0.041931	85.9	85.4	91.4	99.2	134.8	77.5	119.9	109.7	96.2	1.60941e+07	1.59881e+07	1.71285e+07	1.86092e+07	2.52447e+07	1.45335e+07	2.2468e+07	2.05472e+07	1.80573e+07
Q8VCR7	Protein ABHD14B OS=Mus musculus OX=10090 GN=Abhd14b PE=1 SV=1	abhydrolase domain containing 14B	ABHD14B	Cytoplasm	enzyme	0	0	112.371	48	6	210	6	1	210	22.4	6.27	3244	6	0	1.695	1.134	0.029253	0.376141	101.2	58.4	75.8	128.6	112.7	137.1	118.4	81.7	86	1.78675e+08	1.03138e+08	1.34015e+08	2.26832e+08	1.98899e+08	2.42051e+08	2.08999e+08	1.44461e+08	1.51839e+08
Q9Z1Q2	Protein ABHD16A OS=Mus musculus OX=10090 GN=Abhd16a PE=1 SV=3	abhydrolase domain containing 16A	ABHD16A	membrane	other	2	0	53.489	18	10	118	10	1	558	63	8.25	1534	10	0	1.012	1.153	0.45684	0.234149	80.5	98.2	94.4	95.5	141	82.4	109.2	108.8	90	5.23753e+07	6.38478e+07	6.12318e+07	6.1964e+07	9.15447e+07	5.34668e+07	7.08489e+07	7.11387e+07	5.84288e+07
Q99JW1	Alpha/beta hydrolase domain-containing protein 17A OS=Mus musculus OX=10090 GN=Abhd17a PE=1 SV=1	abhydrolase domain containing 17A	ABHD17A	Plasma Membrane	enzyme	0	0	38.874	16	3	28	2	1	310	33.9	6.76	919	3	0	0.277	1.509	0.224513	0.876238	305.9	64.6	62.9	52.4	11.2	17.9	233.7	53.8	97.5	3.37432e+06	1.41042e+06	823230	1.69291e+06	124076	197520	2.57871e+06	1.58048e+06	1.25262e+06
Q7M759	Alpha/beta hydrolase domain-containing protein 17B OS=Mus musculus OX=10090 GN=Abhd17b PE=1 SV=1	abhydrolase domain containing 17B	ABHD17B	Plasma Membrane	peptidase	0	0	91.36	36	5	49	5	1	288	32.2	6.29	443	5	0	0.747	0.961	0.147889	0.840156	130.9	85.4	113.8	85	74.4	93.5	109.4	130.5	77	2.54324e+07	1.68099e+07	2.22089e+07	1.77455e+07	1.64014e+07	1.81783e+07	2.1263e+07	2.54312e+07	1.5247e+07
Q8VCV1	Alpha/beta hydrolase domain-containing protein 17C OS=Mus musculus OX=10090 GN=Abhd17c PE=1 SV=2	abhydrolase domain containing 17C	ABHD17C	Plasma Membrane	enzyme	0	0	89.615	42	7	46	6	1	320	35.1	5.64	1260	7	1	0.705	0.74	0.19026	0.512841	118.8	143.2	90.2	83.7	109.6	54.5	87.9	136.9	75.2	1.49961e+07	1.79263e+07	1.13658e+07	1.07009e+07	1.37232e+07	7.10993e+06	1.11168e+07	1.71393e+07	9.4295e+06
Q9QXM0	Monoacylglycerol lipase ABHD2 OS=Mus musculus OX=10090 GN=Abhd2 PE=1 SV=1	abhydrolase domain containing 2	ABHD2	Cytoplasm	enzyme	0	0	10.514	6	1	7	1	1	425	48.3	6.7	0	1	0	0.699	1.095	0.364079	0.788616	98	119.7	93.3	119	63.8	68.5	107.3	166.9	63.5	2.17737e+06	2.65153e+06	2.28459e+06	2.63551e+06	1.60657e+06	1.67535e+06	2.41733e+06	3.7997e+06	1.53943e+06
Q91ZH7	Phospholipase ABHD3 OS=Mus musculus OX=10090 GN=Abhd3 PE=1 SV=1	abhydrolase domain containing 3	ABHD3	Plasma Membrane	enzyme	1	0	75.248	26	6	67	6	1	411	46.2	7.49	292	6	0	1.535	1.575	0.045924	0.135108	71.5	71.3	98.6	109.7	128.4	103.8	112.6	118	86	1.77026e+07	1.72563e+07	2.42004e+07	2.66289e+07	3.13501e+07	2.50956e+07	2.71659e+07	2.85573e+07	2.09861e+07
Q9DBL9	1-acylglycerol-3-phosphate O-acyltransferase ABHD5 OS=Mus musculus OX=10090 GN=Abhd5 PE=1 SV=1	abhydrolase domain containing 5	ABHD5	Cytoplasm	enzyme	0	0	30.466	13	3	21	3	1	351	39.1	6.79	142	3	0	0.925	1.042	0.731559	0.711326	77.9	95.3	122.9	82.4	155	88.2	100.8	99.3	78.1	3.75125e+06	4.5897e+06	5.94441e+06	3.96945e+06	7.49156e+06	4.24565e+06	4.85199e+06	4.78148e+06	3.75489e+06
Q8R2Y0	Monoacylglycerol lipase ABHD6 OS=Mus musculus OX=10090 GN=Abhd6 PE=1 SV=1	abhydrolase domain containing 6	ABHD6	Cytoplasm	enzyme	1	0.001	8.151	11	2	2	2	1	336	38.2	8.47	52	2	0	1.336	1.987	0.965801	0.149503	71.1	32.2	134.4	95	28.6	108.8	141.3	109.4	179.2	346737	156948	654257	465757	142394	529911	688573	532697	874641
Q8CBW3	Abl interactor 1 OS=Mus musculus OX=10090 GN=Abi1 PE=1 SV=3	abl interactor 1	ABI1	Cytoplasm	other	0	0	33.961	21	6	58	5	1	481	52.3	7.64	691	6	1	1.511	1.312	0.13642	0.218024	72.6	104.7	76.2	92.9	139.3	115.1	95.5	99.9	103.8	2.06892e+07	2.97284e+07	2.16231e+07	2.65061e+07	3.97627e+07	3.27502e+07	2.71789e+07	2.8535e+07	2.95434e+07
P62484	Abl interactor 2 OS=Mus musculus OX=10090 GN=Abi2 PE=1 SV=1	abl interactor 2	ABI2	Cytoplasm	other	0	0.002	5.638	5	2	12	1	1	446	49.4	6.01	52	2	0	1.238	1.185	0.149562	0.259223	79.3	104.3	84.6	98.8	130	104.7	100.5	97.6	100.3	3.7066e+06	4.88067e+06	3.95146e+06	4.62108e+06	6.07787e+06	4.89965e+06	4.68921e+06	4.55946e+06	4.68131e+06
Q8BYZ1	ABI gene family member 3 OS=Mus musculus OX=10090 GN=Abi3 PE=1 SV=3	ABI family member 3	ABI3	Plasma Membrane	other	0	0.001	8.432	12	3	3	3	1	367	39.1	5.54	0	3	0	1.358	0.892	0.427811	0.783082	89	21.3	137.6	70.2	120.9	178.4	70.2	79.4	132.7	1.1229e+06	633955	1.73466e+06	884847	1.52487e+06	2.24897e+06	889641	1.00116e+06	1.67221e+06
Q5SSL4	Active breakpoint cluster region-related protein OS=Mus musculus OX=10090 GN=Abr PE=1 SV=1	ABR activator of RhoGEF and GTPase	ABR	Cytoplasm	other	0	0	10.931	3	2	21	2	1	859	97.6	6.58	202	2	0	1.366	1.45	0.507455	0.470406	83.5	71.1	115	114	75.7	122.2	122.9	74.6	121.1	1.11466e+06	952481	1.54322e+06	1.52531e+06	1.01075e+06	1.63215e+06	1.64349e+06	995681	1.61769e+06
Q4KML4	Costars family protein ABRACL OS=Mus musculus OX=10090 GN=Abracl PE=1 SV=1	ABRA C-terminal like	ABRACL	Other	other	0	0	18.475	27	2	17	2	1	81	9	5.8	730	2	0	1.441	1.185	0.01837	0.22892	87.5	65.8	86.3	104.5	124.3	128.3	123.4	77.7	102.2	2.02967e+06	1.54099e+06	1.97639e+06	2.45763e+06	2.84392e+06	2.94129e+06	2.8726e+06	1.77959e+06	2.34427e+06
Q3TCJ1	BRISC complex subunit Abraxas 2 OS=Mus musculus OX=10090 GN=Abraxas2 PE=1 SV=1	abraxas 2, BRISC complex subunit	ABRAXAS2	Nucleus	other	0	0.001	7.365	3	1	2	1	1	415	46.9	6.18	18	1	0	1.164	1.302	0.712465	0.294813	104.5	79.5	86.7	154.2	51.8	100.9	112.9	84.1	125.4	1.11936e+06	851997	928786	1.65802e+06	556594	1.08096e+06	1.21878e+06	902183	1.35305e+06
Q7TQI7	Ankyrin repeat and BTB/POZ domain-containing protein 2 OS=Mus musculus OX=10090 GN=Abtb2 PE=1 SV=1	ankyrin repeat and BTB domain containing 2	ABTB2	Nucleus	other	0	0	11.78	2	1	2	1	1	1024	113.4	6.28	0	1	0
Q921H8	3-ketoacyl-CoA thiolase A, peroxisomal OS=Mus musculus OX=10090 GN=Acaa1a PE=1 SV=1	acetyl-CoA acyltransferase 1	ACAA1	Cytoplasm	enzyme	0	0	195.154	42	12	211	3	1	424	43.9	8.44	2803	12	9	1.24	1.836	0.316124	0.095972	68.2	69.4	76.4	86	181.9	67.9	127.4	76.6	146.1	6.13983e+07	6.25131e+07	6.87333e+07	7.74385e+07	1.63635e+08	6.11074e+07	1.14843e+08	6.89702e+07	1.31447e+08
Q8VCH0	3-ketoacyl-CoA thiolase B, peroxisomal OS=Mus musculus OX=10090 GN=Acaa1b PE=1 SV=1	acetyl-Coenzyme A acyltransferase 1B	Acaa1b	Cytoplasm	enzyme	0	0	195.144	46	12	213	3	1	424	44	8.51	2717	12	0	1.246	2.041	0.231399	0.10064	76.4	9.9	74.9	93.4	195	64.3	159.7	73.6	152.9	8.75806e+06	2.02511e+06	8.75821e+06	1.06437e+07	2.24561e+07	7.42666e+06	1.81962e+07	8.39791e+06	1.77889e+07
Q8BWT1	3-ketoacyl-CoA thiolase, mitochondrial OS=Mus musculus OX=10090 GN=Acaa2 PE=1 SV=3	acetyl-CoA acyltransferase 2	ACAA2	Cytoplasm	enzyme	0	0	655.158	78	31	1039	31	1	397	41.8	8.09	17641	31	0	1.055	1.074	0.294216	0.22484	99.4	93.5	89.2	112.2	93.8	98.7	100.4	95.5	117.2	6.43194e+08	6.05511e+08	5.77302e+08	7.25769e+08	6.07147e+08	6.38611e+08	6.49803e+08	6.18323e+08	7.58408e+08
Q5SWU9	Acetyl-CoA carboxylase 1 OS=Mus musculus OX=10090 GN=Acaca PE=1 SV=1	acetyl-CoA carboxylase alpha	ACACA	Cytoplasm	enzyme	0	0	78.517	6	10	59	8	1	2345	265.1	6.39	923	10	2	1.188	1.099	0.301963	0.581071	64.6	105.9	86.6	85.1	160.9	102.8	95.2	70.6	128.2	1.31485e+07	2.1792e+07	1.76188e+07	1.73603e+07	3.28987e+07	2.09593e+07	1.93929e+07	1.47271e+07	2.60859e+07
E9Q4Z2	Acetyl-CoA carboxylase 2 OS=Mus musculus OX=10090 GN=Acacb PE=1 SV=1	acetyl-CoA carboxylase beta	ACACB	Cytoplasm	enzyme	1	0	28.582	4	5	16	3	1	2448	275.6	6.32	104	5	0	0.935	0.849	0.356338	0.784475	63.6	103.6	101.5	93.8	156	94.9	86.2	74.4	125.9	1.65281e+06	2.69143e+06	2.63923e+06	2.43925e+06	4.08127e+06	2.46439e+06	2.2412e+06	1.93825e+06	3.26925e+06
Q8K370	Acyl-CoA dehydrogenase family member 10 OS=Mus musculus OX=10090 GN=Acad10 PE=1 SV=1	acyl-CoA dehydrogenase family member 10	ACAD10	Cytoplasm	enzyme	0	0	100.672	15	11	99	11	1	1069	118.9	8.24	1093	11	0	1.244	1.424	0.03263	0.019118	75.9	80.5	89.9	100.1	99.7	118.7	114.6	99.1	121.5	2.65169e+07	2.81169e+07	3.13987e+07	3.49967e+07	3.47967e+07	4.14325e+07	4.0085e+07	3.47101e+07	4.24028e+07
Q80XL6	Acyl-CoA dehydrogenase family member 11 OS=Mus musculus OX=10090 GN=Acad11 PE=1 SV=2	acyl-CoA dehydrogenase family member 11	ACAD11	Cytoplasm	enzyme	0	0	217.654	40	22	276	22	1	779	87.3	8.43	3757	22	0	1.268	1.13	0.333456	0.505305	57.2	69.2	112.9	87.5	179.3	87.7	75.2	78.2	152.8	1.04941e+08	1.2664e+08	2.06692e+08	1.60585e+08	3.28454e+08	1.60732e+08	1.37666e+08	1.4337e+08	2.79761e+08
Q9D7B6	Isobutyryl-CoA dehydrogenase, mitochondrial OS=Mus musculus OX=10090 GN=Acad8 PE=1 SV=2	acyl-CoA dehydrogenase family member 8	ACAD8	Cytoplasm	enzyme	0	0	86.741	31	10	86	10	1	413	45	8.13	1482	10	0	1.318	1.039	0.001493	0.34363	90.3	86.8	86.3	114.3	121.8	110.4	112.9	87	90.1	4.91772e+07	4.75689e+07	4.72031e+07	6.2275e+07	6.63959e+07	6.0109e+07	6.14467e+07	4.79622e+07	4.91929e+07
Q8JZN5	Acyl-CoA dehydrogenase family member 9, mitochondrial OS=Mus musculus OX=10090 GN=Acad9 PE=1 SV=2	acyl-CoA dehydrogenase family member 9	ACAD9	Cytoplasm	enzyme	0	0	173.41	31	13	164	13	1	625	68.7	7.46	1977	13	0	1.16	1.053	0.98262	0.620865	83.8	91.1	132.9	105.7	88	115.3	95.9	91.1	96.1	3.75677e+07	4.10764e+07	5.94476e+07	4.72243e+07	3.97831e+07	5.15867e+07	4.31468e+07	4.07663e+07	4.29677e+07
P51174	Long-chain specific acyl-CoA dehydrogenase, mitochondrial OS=Mus musculus OX=10090 GN=Acadl PE=1 SV=2	acyl-CoA dehydrogenase long chain	ACADL	Cytoplasm	enzyme	0	0	306.379	53	19	421	19	1	430	47.9	8.31	4860	19	0	1.33	1.192	0.016262	0.022416	83.8	91.5	82.6	111.4	103.5	124.9	99.9	96.1	106.4	3.33904e+08	3.64687e+08	3.28846e+08	4.4384e+08	4.12367e+08	4.97421e+08	3.97747e+08	3.82812e+08	4.23712e+08
P45952	Medium-chain specific acyl-CoA dehydrogenase, mitochondrial OS=Mus musculus OX=10090 GN=Acadm PE=1 SV=1	acyl-CoA dehydrogenase medium chain	ACADM	Cytoplasm	enzyme	0	0	451.878	61	25	918	25	1	421	46.5	8.37	12375	25	0	1.112	1.163	0.913691	0.0794	94.6	92.8	89.3	112.7	65.7	103.3	131.7	101.9	107.9	8.47964e+08	8.31995e+08	8.00039e+08	1.01058e+09	5.88978e+08	9.25568e+08	1.18078e+09	9.13283e+08	9.67331e+08
Q07417	Short-chain specific acyl-CoA dehydrogenase, mitochondrial OS=Mus musculus OX=10090 GN=Acads PE=1 SV=2	acyl-CoA dehydrogenase short chain	ACADS	Cytoplasm	enzyme	0	0	291.672	50	14	381	14	1	412	44.9	8.47	8630	14	0	1.201	1.147	0.452556	0.514159	87.5	110	88.8	106.7	91.8	111.1	101.8	94.3	108	1.64935e+08	2.0734e+08	1.67343e+08	2.01084e+08	1.72942e+08	2.09262e+08	1.91837e+08	1.77634e+08	2.03375e+08
Q9DBL1	Short/branched chain specific acyl-CoA dehydrogenase, mitochondrial OS=Mus musculus OX=10090 GN=Acadsb PE=1 SV=1	acyl-CoA dehydrogenase short/branched chain	ACADSB	Cytoplasm	enzyme	0	0	188.701	40	11	206	11	1	432	47.8	7.87	1906	11	0	1.209	1.077	0.21228	0.842244	103.4	86.7	77.6	99.1	169.4	104.9	93.4	102.1	63.3	6.03572e+07	5.07707e+07	4.5303e+07	5.78638e+07	9.89043e+07	6.14359e+07	5.4538e+07	5.96978e+07	3.71251e+07
P50544	Very long-chain specific acyl-CoA dehydrogenase, mitochondrial OS=Mus musculus OX=10090 GN=Acadvl PE=1 SV=3	acyl-CoA dehydrogenase very long chain	ACADVL	Cytoplasm	enzyme	0	0	897.804	74	43	1516	43	1	656	70.8	8.75	30062	43	0	0.871	0.74	0.568463	0.19088	83.3	108.4	161.1	81.2	127.5	94.3	78.6	85.4	80.2	7.98698e+08	1.03913e+09	1.54585e+09	7.78738e+08	1.22293e+09	9.05242e+08	7.53305e+08	8.19366e+08	7.69678e+08
Q6ZQK5	Arf-GAP with coiled-coil, ANK repeat and PH domain-containing protein 2 OS=Mus musculus OX=10090 GN=Acap2 PE=1 SV=2	ArfGAP with coiled-coil, ankyrin repeat and PH domains 2	ACAP2	Nucleus	other	0	0.11	1.578	4	1	1	1	1	770	87.2	6.68	0	1	0	Present in 4h only							96.8	517.8	285.4							49035.4	262421	145880
Q8QZT1	Acetyl-CoA acetyltransferase, mitochondrial OS=Mus musculus OX=10090 GN=Acat1 PE=1 SV=1	acetyl-CoA acetyltransferase 1	ACAT1	Cytoplasm	enzyme	0	0	431.703	69	20	653	20	1	424	44.8	8.51	10763	20	0	1.128	0.986	0.273328	0.808413	92.6	90.9	102	104.5	93.4	123.1	116.9	91.4	85.2	4.42328e+08	4.33987e+08	4.87119e+08	4.99168e+08	4.46101e+08	5.87811e+08	5.58249e+08	4.37124e+08	4.06902e+08
Q8CAY6	Acetyl-CoA acetyltransferase, cytosolic OS=Mus musculus OX=10090 GN=Acat2 PE=1 SV=2	acetyl-CoA acetyltransferase 2	ACAT2	Cytoplasm	enzyme	0	0	95.615	32	6	50	6	1	397	41.3	7.5	670	6	0	1.208	1.355	0.112273	0.275303	83	59.2	86.5	100.2	98.4	155.4	112.4	65.2	139.7	2.10633e+07	1.55848e+07	2.23769e+07	2.5395e+07	2.50071e+07	3.97057e+07	2.8447e+07	1.71376e+07	3.55419e+07
Q8BMP6	Golgi resident protein GCP60 OS=Mus musculus OX=10090 GN=Acbd3 PE=1 SV=3	acyl-CoA binding domain containing 3	ACBD3	Cytoplasm	other	0	0	91.747	15	5	75	5	1	525	60.1	5.11	1375	5	0	1.127	1.006	0.355346	0.608543	96.4	99.7	84.9	108.7	136.9	84.7	97.1	97	94.5	2.6543e+07	2.74672e+07	2.34018e+07	2.99232e+07	3.77314e+07	2.33531e+07	2.67326e+07	2.67239e+07	2.60108e+07
Q5XG73	Acyl-CoA-binding domain-containing protein 5 OS=Mus musculus OX=10090 GN=Acbd5 PE=1 SV=1	acyl-CoA binding domain containing 5	ACBD5	Nucleus	other	1	0	10.225	7	3	6	3	1	508	56.6	5.41	57	3	0	0.998	0.703	0.440025	0.406469	119.3	116.9	110.4	116.7	120.1	55.1	82.2	142.3	36.9	1.51998e+07	1.47081e+07	1.37942e+07	1.47134e+07	1.52348e+07	7.66818e+06	1.13152e+07	1.78542e+07	4.59725e+06
P09470	Angiotensin-converting enzyme OS=Mus musculus OX=10090 GN=Ace PE=1 SV=3	angiotensin I converting enzyme	ACE	Plasma Membrane	peptidase	1	0	1765.65	65	76	4073	76	1	1312	150.8	6.55	57640	76	0	0.593	0.78	0.030787	0.124604	137.6	107.6	125.7	74.5	58.3	97.5	85.2	115.6	98	5.53628e+09	4.32861e+09	5.05737e+09	2.99957e+09	2.34387e+09	3.92489e+09	3.4311e+09	4.6512e+09	3.94438e+09
Q8R0I0	Angiotensin-converting enzyme 2 OS=Mus musculus OX=10090 GN=Ace2 PE=1 SV=1	angiotensin I converting enzyme 2	ACE2	Plasma Membrane	peptidase	1	0	1155.86	67	44	1744	44	1	805	92.3	5.54	29389	44	0	0.607	0.787	0.028465	0.165496	130	134.9	97.9	87	74.4	78.9	106.9	102.3	87.7	1.69556e+09	1.75852e+09	1.27777e+09	1.13372e+09	9.70744e+08	1.02963e+09	1.3936e+09	1.3379e+09	1.14465e+09
Q9JIX8	Apoptotic chromatin condensation inducer in the nucleus OS=Mus musculus OX=10090 GN=Acin1 PE=1 SV=3	apoptotic chromatin condensation inducer 1	ACIN1	Nucleus	enzyme	0	0	20.906	3	3	14	3	1	1338	150.6	5.91	62	3	0	1.305	1.063	0.294361	0.418467	105	60.3	92.7	121	128	80.8	132.3	98.6	81.3	5.15127e+06	2.96513e+06	4.54858e+06	5.98319e+06	6.27613e+06	3.95958e+06	6.48439e+06	4.85126e+06	3.98237e+06
Q91V92	ATP-citrate synthase OS=Mus musculus OX=10090 GN=Acly PE=1 SV=1	ATP citrate lyase	ACLY	Cytoplasm	enzyme	0	0	435.029	48	37	717	37	1	1091	119.7	7.44	13926	37	0	1.126	1.031	0.141513	0.560801	93.9	94.9	103.6	106.9	101.9	124	102.6	74.2	97.9	3.18008e+08	3.21268e+08	3.50653e+08	3.61795e+08	3.44857e+08	4.19395e+08	3.47442e+08	2.51784e+08	3.31097e+08
Q8R519	2-amino-3-carboxymuconate-6-semialdehyde decarboxylase OS=Mus musculus OX=10090 GN=Acmsd PE=1 SV=2	aminocarboxymuconate semialdehyde decarboxylase	ACMSD	Cytoplasm	enzyme	0	0	45.434	16	2	22	2	1	336	38	6.25	107	2	0	2.883	3.439	0.270145	0.070243	86	13.6	53.1	189	21.6	153.2	133.6		249.8	1.30272e+06	207076	804675	2.86501e+06	350382	2.32158e+06	2.07519e+06		3.90856e+06
A2AKK5	Acyl-coenzyme A amino acid N-acyltransferase 1 OS=Mus musculus OX=10090 GN=Acnat1 PE=1 SV=1	acyl-coenzyme A amino acid N-acyltransferase 2	Acnat1/Acnat2	Cytoplasm	enzyme	0	0	14.725	6	2	8	2	1	416	46	8.73	111	2	0	1.113	1.082	0.968949	0.445682	44.4	85.6	135.3	59.9	106.3	95.4	89.2	92.7	191.2	3.62518e+06	6.77963e+06	1.07046e+07	4.81378e+06	8.40413e+06	7.55569e+06	7.2942e+06	7.34013e+06	1.51774e+07
P28271	Cytoplasmic aconitate hydratase OS=Mus musculus OX=10090 GN=Aco1 PE=1 SV=3	aconitase 1	ACO1	Cytoplasm	enzyme	0	0	675.5	63	39	1241	39	1	889	98.1	7.5	16476	39	0	1.436	1.041	0.028654	0.706968	104	80.6	76.4	129.9	114.7	115.7	116.1	78.6	83.9	7.86978e+08	6.09727e+08	5.77945e+08	9.82663e+08	8.68449e+08	8.75414e+08	8.78625e+08	5.95868e+08	6.35247e+08
Q99KI0	Aconitate hydratase, mitochondrial OS=Mus musculus OX=10090 GN=Aco2 PE=1 SV=1	aconitase 2	ACO2	Cytoplasm	enzyme	0	0	994.512	69	50	1949	50	1	780	85.4	7.93	34295	50	0	0.911	0.935	0.947378	0.701813	111.6	105.9	87.7	123.8	81.9	96.5	109.4	99	84.1	1.72717e+09	1.63892e+09	1.35671e+09	1.91549e+09	1.26784e+09	1.49325e+09	1.69259e+09	1.53278e+09	1.30161e+09
O55137	Acyl-coenzyme A thioesterase 1 OS=Mus musculus OX=10090 GN=Acot1 PE=1 SV=1	acyl-CoA thioesterase 1	Acot1	Cytoplasm	enzyme	0	0	150.756	50	14	319	6	1	419	46.1	6.58	2798	14	8	2.027	2.195	0.002124	0.053713	60	63.8	61.7	125.1	132.5	104.8	135.4	76.5	140.3	9.36101e+07	9.94752e+07	9.61403e+07	1.95077e+08	2.06454e+08	1.63344e+08	2.11125e+08	1.19198e+08	2.18637e+08
Q8VHQ9	Acyl-coenzyme A thioesterase 11 OS=Mus musculus OX=10090 GN=Acot11 PE=1 SV=1	acyl-CoA thioesterase 11	ACOT11	Cytoplasm	enzyme	0	0	43.991	14	5	73	5	1	594	67.3	6.8	773	5	0	1.091	1.003	0.55811	0.602322	95.6	85.8	117.9	109.5	104	104.3	96.4	95.9	90.6	1.61759e+07	1.45857e+07	2.00193e+07	1.84397e+07	1.75583e+07	1.78415e+07	1.62506e+07	1.6272e+07	1.53761e+07
Q9DBK0	Acyl-coenzyme A thioesterase 12 OS=Mus musculus OX=10090 GN=Acot12 PE=1 SV=1	acyl-CoA thioesterase 12	ACOT12	Cytoplasm	enzyme	0	0	102.15	20	9	142	9	1	556	61.7	7.18	1693	9	0	1.417	1.444	0.001231	0.026226	82.8	76.3	76.5	106	108.4	116.8	110.4	95.5	127.4	3.32099e+07	3.0549e+07	3.09243e+07	4.24758e+07	4.34541e+07	4.68443e+07	4.42499e+07	3.82631e+07	5.10293e+07
Q9CQR4	Acyl-coenzyme A thioesterase 13 OS=Mus musculus OX=10090 GN=Acot13 PE=1 SV=1	acyl-CoA thioesterase 13	ACOT13	Cytoplasm	enzyme	0	0	26.041	34	3	30	3	1	140	15.2	8.82	463	3	0	1.347	1.242	0.738261	0.407163	97	54.6	111.7	136.5	35.8	130.6	138	75.2	120.5	1.44888e+07	8.15257e+06	1.67615e+07	2.04102e+07	5.36326e+06	1.95998e+07	2.06209e+07	1.12393e+07	1.79977e+07
Q9QYR9	Acyl-coenzyme A thioesterase 2, mitochondrial OS=Mus musculus OX=10090 GN=Acot2 PE=1 SV=2	acyl-CoA thioesterase 2	ACOT2	Cytoplasm	enzyme	0	0	106.215	40	11	241	4	1	453	49.6	7.36	2513	11	0	1.407	1.625	0.066705	0.122084	68.6	66.2	77.9	137.3	96.6	91.2	168.3	82.4	111.5	2.56384e+06	2.4898e+06	2.90835e+06	5.07584e+06	3.62882e+06	3.36452e+06	6.2428e+06	3.03895e+06	4.11992e+06
Q8BWN8	Acyl-coenzyme A thioesterase 4 OS=Mus musculus OX=10090 GN=Acot4 PE=1 SV=1	acyl-CoA thioesterase 4	ACOT4	Cytoplasm	enzyme	0	0	56.531	21	5	98	2	1	421	46.5	7.85	1587	5	0	2.272	1.428	0.100932	0.068854	60.7	76.8	72.1	165.7	163.8	74.4	102.9	77.2	106.4	942997	1.19205e+06	1.17122e+06	2.56831e+06	2.53602e+06	1.18186e+06	1.61128e+06	1.19605e+06	1.658e+06
P58137	Acyl-coenzyme A thioesterase 8 OS=Mus musculus OX=10090 GN=Acot8 PE=1 SV=1	acyl-CoA thioesterase 8	ACOT8	Cytoplasm	enzyme	0	0	82.648	31	7	40	7	1	320	35.8	7.64	537	7	0	0.883	0.741	0.360461	0.37777	107.4	77.4	185.1	74.8	98.4	94.8	79.6	62.8	119.7	2.58804e+07	1.86384e+07	4.45653e+07	1.80166e+07	2.37079e+07	2.28405e+07	1.91653e+07	1.51248e+07	2.88572e+07
Q9R0X4	Acyl-coenzyme A thioesterase 9, mitochondrial OS=Mus musculus OX=10090 GN=Acot9 PE=1 SV=1	acyl-CoA thioesterase 9	ACOT9	Cytoplasm	enzyme	0	0	70.621	22	8	81	8	1	439	50.5	8.59	722	8	0	1.2	1.379	0.438007	0.666763	118.6	75.5	79.4	135.2	95.3	93.1	123.9	109.5	69.7	3.52177e+07	2.26849e+07	2.3645e+07	4.01426e+07	2.8336e+07	2.77064e+07	3.67954e+07	3.27784e+07	2.07684e+07
Q9R0H0	Peroxisomal acyl-coenzyme A oxidase 1 OS=Mus musculus OX=10090 GN=Acox1 PE=1 SV=5	acyl-CoA oxidase 1	ACOX1	Cytoplasm	enzyme	0	0	991.156	86	45	1317	45	1	661	74.6	8.48	22877	45	0	1.236	1.534	0.293427	0.216786	74.6	50.6	107	92.2	116.5	90.2	114.4	82	172.3	5.95894e+08	4.04596e+08	8.54516e+08	7.35908e+08	9.29798e+08	7.19974e+08	9.13039e+08	6.54603e+08	1.37424e+09
Q9QXD1	Peroxisomal acyl-coenzyme A oxidase 2 OS=Mus musculus OX=10090 GN=Acox2 PE=1 SV=2	acyl-CoA oxidase 2	ACOX2	Cytoplasm	enzyme	0	0	236.622	37	18	285	18	1	681	76.8	7.46	4973	18	0	1.064	1.204	0.579718	0.920058	67.7	68.4	132	68.8	229.5	72.8	82.4	74.3	104	8.14104e+07	8.21562e+07	1.58769e+08	8.25727e+07	2.76414e+08	8.73939e+07	9.89341e+07	8.93637e+07	1.25375e+08
Q9EPL9	Peroxisomal acyl-coenzyme A oxidase 3 OS=Mus musculus OX=10090 GN=Acox3 PE=1 SV=2	acyl-CoA oxidase 3, pristanoyl	ACOX3	Cytoplasm	enzyme	0	0	256.776	41	19	201	19	1	700	78.4	7.12	4214	19	0	1.422	1.523	0.373088	0.39525	70.5	60.4	122.9	89.6	135.5	100.3	107.4	83.8	129.5	4.76233e+07	4.08047e+07	8.3158e+07	6.05198e+07	9.14906e+07	6.7711e+07	7.24836e+07	5.66024e+07	8.74556e+07
Q9D358	Low molecular weight phosphotyrosine protein phosphatase OS=Mus musculus OX=10090 GN=Acp1 PE=1 SV=3	acid phosphatase 1	ACP1	Cytoplasm	phosphatase	0	0	11.982	13	2	13	2	1	158	18.2	6.74	56	2	0	1.706	1.205	0.001171	0.131577	75.6	69.9	76.7	128.9	141.1	119	118.3	79.4	91	8.96634e+06	8.32979e+06	9.15261e+06	1.52971e+07	1.67433e+07	1.41726e+07	1.40412e+07	9.41809e+06	1.09339e+07
P24638	Lysosomal acid phosphatase OS=Mus musculus OX=10090 GN=Acp2 PE=1 SV=2	acid phosphatase 2, lysosomal	ACP2	Cytoplasm	phosphatase	2	0	142.383	30	13	240	13	1	423	48.5	7.02	2959	13	0	0.702	0.681	0.041334	0.132898	100.3	133.4	128.9	70.5	90.5	91.3	87.9	112.9	84.3	1.92268e+08	2.56023e+08	2.47108e+08	1.3508e+08	1.73541e+08	1.74936e+08	1.68509e+08	2.16369e+08	1.61577e+08
Q05117	Tartrate-resistant acid phosphatase type 5 OS=Mus musculus OX=10090 GN=Acp5 PE=1 SV=2	acid phosphatase 5, tartrate resistant	Acp5	Cytoplasm	phosphatase	0	0	15.489	6	1	12	1	1	327	36.8	8.9	142	1	0	0.694	0.782	0.174855	0.176569	96.3	130.9	144.3	75	114.8	90.8	104.3	41.3	102.3	4.36617e+06	5.93041e+06	6.53263e+06	3.39951e+06	5.19698e+06	4.11312e+06	4.74142e+06	2.95979e+06	4.72753e+06
Q8BP40	Lysophosphatidic acid phosphatase type 6 OS=Mus musculus OX=10090 GN=Acp6 PE=1 SV=1	acid phosphatase 6, lysophosphatidic	ACP6	Cytoplasm	phosphatase	0	0	59.297	16	6	45	6	1	418	47.6	7.72	425	6	0	0.898	1	0.424604	0.923885	88.5	115.4	104.3	93.7	100.5	92.1	104.3	107.5	93.7	2.30749e+07	3.00537e+07	2.71594e+07	2.44789e+07	2.62168e+07	2.40091e+07	2.72449e+07	2.79921e+07	2.4428e+07
Q8CE08	Prostatic acid phosphatase OS=Mus musculus OX=10090 GN=Acpp PE=2 SV=1	acid phosphatase, prostate	ACPP	Extracellular Space	phosphatase	0	0.031	2.569	2	1	2	1	1	381	43.7	6.24	63	1	0	1.286	1.567	0.599435	0.279593	57.5	66.5	116.8	76	117.4	85.5	85.6	104.2	190.6	323098	368523	646291	426040	667330	480472	475015	577763	1.05633e+06
Q8VCW8	Acyl-CoA synthetase family member 2, mitochondrial OS=Mus musculus OX=10090 GN=Acsf2 PE=1 SV=1	acyl-CoA synthetase family member 2	ACSF2	Cytoplasm	enzyme	0	0.02	2.961	4	1	4	1	1	615	67.9	8.18	39	1	0	2.701	2.548	0.430033	0.587562	153.8	27.8	42.9	130.7	87.5	116	109.4	24.5	207.4	496908	92129	194408	417869	282359	371304	352566	137006	666231
Q3URE1	Acyl-CoA synthetase family member 3, mitochondrial OS=Mus musculus OX=10090 GN=Acsf3 PE=1 SV=2	acyl-CoA synthetase family member 3	ACSF3	Cytoplasm	enzyme	0	0	26.84	5	2	26	2	1	583	65	8.02	236	2	0	2.1	0.767	0.320092	0.349797	49.9	132.2	76.1	159.7	244.9	56.5	65.5	56.8	58.4	1.96042e+06	7.42204e+06	2.97338e+06	8.39834e+06	1.09666e+07	2.20742e+06	2.57554e+06	2.22039e+06	2.27976e+06
P41216	Long-chain-fatty-acid--CoA ligase 1 OS=Mus musculus OX=10090 GN=Acsl1 PE=1 SV=2	acyl-CoA synthetase long chain family member 1	ACSL1	Cytoplasm	enzyme	1	0	401.393	49	27	531	24	1	699	77.9	7.15	7637	27	5	1.454	1.286	0.134409	0.310419	74.1	78.4	103.3	114.1	128.6	91.9	100.9	82.8	126	2.43081e+08	2.57432e+08	3.38748e+08	3.74071e+08	4.21625e+08	3.0125e+08	3.30888e+08	2.7181e+08	4.13353e+08
Q9CZW4	Long-chain-fatty-acid--CoA ligase 3 OS=Mus musculus OX=10090 GN=Acsl3 PE=1 SV=2	acyl-CoA synthetase long chain family member 3	ACSL3	Cytoplasm	enzyme	1	0	19.469	9	3	10	3	1	720	80.4	8.54	67	3	0	1.031	1.065	0.356649	0.271109	85.7	53.3	90.3	150.4	88.4	72.9	183.2	91.3	84.5	2.53002e+06	1.59174e+06	2.62633e+06	4.35016e+06	2.56761e+06	2.13629e+06	5.31726e+06	2.78196e+06	2.50832e+06
Q9QUJ7	Long-chain-fatty-acid--CoA ligase 4 OS=Mus musculus OX=10090 GN=Acsl4 PE=1 SV=2	acyl-CoA synthetase long chain family member 4	ACSL4	Cytoplasm	enzyme	1	0.001	7.336	3	1	1	1	1	711	79	8.28	27	1	0	1.302	1.934	0.436332	0.159868	71.9	64	92.9	121.1	93.6	63	180.1	74.6	139	938865	828784	1.20194e+06	1.58151e+06	1.21051e+06	814651	2.37254e+06	970991	1.79769e+06
Q8JZR0	Long-chain-fatty-acid--CoA ligase 5 OS=Mus musculus OX=10090 GN=Acsl5 PE=1 SV=1	acyl-CoA synthetase long chain family member 5	ACSL5	Cytoplasm	enzyme	1	0	197.869	35	19	251	16	1	683	76.2	7.09	2103	19	0	1.196	1.079	0.140482	0.545113	93.8	80.2	103.6	112.2	113.4	98.1	112.9	101.2	84.6	6.02883e+07	5.14475e+07	6.64561e+07	7.20353e+07	7.35214e+07	6.29378e+07	7.23938e+07	6.48778e+07	5.43242e+07
Q91VA0	Acyl-coenzyme A synthetase ACSM1, mitochondrial OS=Mus musculus OX=10090 GN=Acsm1 PE=1 SV=1	acyl-CoA synthetase medium chain family member 1	ACSM1	Cytoplasm	enzyme	0	0	145.456	28	10	260	9	1	573	64.7	7.17	2741	10	0	1.059	0.858	0.742426	0.851644	112.7	84	108.6	116.2	48.7	115	131.1	93.2	90.5	3.82081e+07	2.8503e+07	3.68811e+07	3.93716e+07	1.65064e+07	3.90554e+07	4.44258e+07	3.15728e+07	3.06712e+07
Q8K0L3	Acyl-coenzyme A synthetase ACSM2, mitochondrial OS=Mus musculus OX=10090 GN=Acsm2 PE=1 SV=1	acyl-CoA synthetase medium chain family member 2A	ACSM2A	Cytoplasm	enzyme	0	0	1004.35	76	41	2733	40	1	575	64.2	8.31	45238	41	1	1.008	1.203	0.727747	0.68868	122.1	94	84.9	117.6	68.3	94.8	113.4	113.1	91.7	4.19393e+09	3.22855e+09	2.91701e+09	4.03958e+09	2.34626e+09	3.25541e+09	3.89649e+09	3.88449e+09	3.14864e+09
Q3UNX5	Acyl-coenzyme A synthetase ACSM3, mitochondrial OS=Mus musculus OX=10090 GN=Acsm3 PE=1 SV=2	acyl-CoA synthetase medium chain family member 3	ACSM3	Cytoplasm	enzyme	0	0	268.12	45	19	432	19	1	580	65.6	7.46	6566	19	0	0.891	1.069	0.68371	0.611554	87.5	96.1	115.1	85.6	61.9	124.8	102.7	141	85.3	1.72989e+08	1.90021e+08	2.27399e+08	1.69209e+08	1.2232e+08	2.46619e+08	2.02902e+08	2.78765e+08	1.68584e+08
Q8BGA8	Acyl-coenzyme A synthetase ACSM5, mitochondrial OS=Mus musculus OX=10090 GN=Acsm5 PE=1 SV=1	acyl-CoA synthetase medium chain family member 5	ACSM5	mitochondria	enzyme	0	0	13.444	9	3	13	3	1	578	64.3	7.72	36	3	0	1.051	1.154	0.800421	0.673182	94.3	61.6	127.5	99	72.3	133.1	117.1	108.8	86.3	1.34225e+06	791442	1.58446e+06	1.39262e+06	936997	1.84562e+06	1.55899e+06	1.64166e+06	1.04567e+06
Q99NB1	Acetyl-coenzyme A synthetase 2-like, mitochondrial OS=Mus musculus OX=10090 GN=Acss1 PE=1 SV=1	acyl-CoA synthetase short chain family member 1	ACSS1	Cytoplasm	enzyme	0	0	369.344	53	23	453	23	1	682	74.6	6.98	6079	23	0	0.859	0.861	0.583761	0.347274	127.6	105.4	88.7	118.1	86.1	90.6	102.7	89.9	90.8	2.50642e+08	2.06828e+08	1.74001e+08	2.31819e+08	1.68884e+08	1.77633e+08	2.02052e+08	1.76363e+08	1.78056e+08
Q9QXG4	Acetyl-coenzyme A synthetase, cytoplasmic OS=Mus musculus OX=10090 GN=Acss2 PE=1 SV=2	acyl-CoA synthetase short chain family member 2	ACSS2	Cytoplasm	enzyme	1	0	122.568	21	12	135	12	1	701	78.8	6.64	1993	12	0	1.316	1.194	0.135621	0.379636	105.4	85.7	82.8	112.8	96.9	115.5	102.4	89.5	109	9.91891e+07	8.05955e+07	7.78001e+07	1.06061e+08	9.1019e+07	1.08508e+08	9.62162e+07	8.41058e+07	1.02403e+08
Q14DH7	Acyl-CoA synthetase short-chain family member 3, mitochondrial OS=Mus musculus OX=10090 GN=Acss3 PE=1 SV=2	acyl-CoA synthetase short chain family member 3	ACSS3	Cytoplasm	enzyme	0	0	37.284	9	4	29	4	1	682	74.5	8.63	504	4	0	0.948	0.888	0.805404	0.534175	133.2	75	111.8	124.8	71	105.9	99.3	70.6	108.4	6.56455e+06	3.75037e+06	5.50715e+06	6.1508e+06	3.50233e+06	5.25028e+06	4.89276e+06	3.52203e+06	5.3876e+06
P68134	Actin, alpha skeletal muscle OS=Mus musculus OX=10090 GN=Acta1 PE=1 SV=1	actin alpha 1, skeletal muscle	ACTA1	Cytoplasm	other	0	0	976.084	85	37	5651	4	1	377	42	5.39	76962	37	19	0.945	0.835	0.77904	0.278769	83.6	91.4	171.8	76.4	86.3	151.1	74.2	76.3	89	9.89468e+08	1.08032e+09	2.03018e+09	9.04494e+08	1.02032e+09	1.7905e+09	8.76514e+08	9.03056e+08	1.05243e+09
P62737	Actin, aortic smooth muscle OS=Mus musculus OX=10090 GN=Acta2 PE=1 SV=1	actin alpha 2, smooth muscle	ACTA2	Cytoplasm	other	0	0	867.636	91	37	4959	4	1	377	42	5.39	72276	37	0	0.904	0.757	0.445896	0.357689	104.6	62.1	229.8	71.2	94.5	101.2	96.3	61	79.2	3.81673e+07	2.26594e+07	8.41569e+07	2.61631e+07	3.4551e+07	3.73995e+07	3.51137e+07	2.23702e+07	2.89477e+07
Q8BFZ3	Beta-actin-like protein 2 OS=Mus musculus OX=10090 GN=Actbl2 PE=1 SV=1	actin beta like 2	ACTBL2	Nucleus	other	0	0	475.187	59	22	3285	8	1	376	42	5.49	44826	22	0	0.787	0.559	0.721325	0.391643	53.5	213.4	102.7	72.8	154.1	80.8	53	112.4	57.4	2.64057e+07	1.06628e+08	5.01076e+07	3.59099e+07	7.7056e+07	3.95747e+07	2.6064e+07	5.51613e+07	2.79222e+07
Q7TPR4	Alpha-actinin-1 OS=Mus musculus OX=10090 GN=Actn1 PE=1 SV=1	actinin alpha 1	ACTN1	Cytoplasm	transcription regulator	0	0	393.559	31	26	1066	7	1	892	103	5.38	23056	26	0	1.275	1.341	0.069131	0.033344	74	80.1	96.1	126.7	102.2	100.6	112	100.9	107.4	1.69282e+07	1.83725e+07	2.1977e+07	2.89799e+07	2.35576e+07	2.31507e+07	2.56578e+07	2.32412e+07	2.45888e+07
O88990	Alpha-actinin-3 OS=Mus musculus OX=10090 GN=Actn3 PE=2 SV=1	actinin alpha 3	Actn3	Plasma Membrane	other	0	0	119.749	8	8	277	1	1	900	103	5.45	5841	8	0
P57780	Alpha-actinin-4 OS=Mus musculus OX=10090 GN=Actn4 PE=1 SV=1	actinin alpha 4	ACTN4	Cytoplasm	transcription regulator	0	0	1538.24	83	69	2649	50	1	912	104.9	5.41	47549	69	22	1.115	1.018	0.964746	0.940448	76.2	134.9	91.4	101.9	86	111.9	86.3	118.4	93	1.43233e+09	2.5366e+09	1.71789e+09	1.91477e+09	1.61533e+09	2.10441e+09	1.62226e+09	2.22743e+09	1.74822e+09
Q9QZB7	Actin-related protein 10 OS=Mus musculus OX=10090 GN=Actr10 PE=1 SV=2	actin related protein 10	ACTR10	Cytoplasm	other	0	0	93.636	30	8	107	8	1	417	46.2	7.61	1140	8	0	1.343	1.079	0.404785	0.705924	88.5	77.2	122.2	87.7	118.9	135.8	97.7	76.3	95.5	1.77159e+07	1.54798e+07	2.44575e+07	1.75546e+07	2.38027e+07	2.71669e+07	1.95541e+07	1.52661e+07	1.91154e+07
P61164	Alpha-centractin OS=Mus musculus OX=10090 GN=Actr1a PE=1 SV=1	actin related protein 1A	ACTR1A	Cytoplasm	other	0	0	139.947	35	9	179	1	1	376	42.6	6.64	2932	9	0	1.16	0.954	0.670788	0.248149	91.2	93.5	121.4	108.5	81.4	144.7	95.6	74.6	89.2	5.58276e+06	5.72106e+06	7.43263e+06	6.63038e+06	4.98768e+06	8.84269e+06	5.84666e+06	4.70279e+06	5.45471e+06
Q8R5C5	Beta-centractin OS=Mus musculus OX=10090 GN=Actr1b PE=1 SV=1	actin related protein 1B	ACTR1B	Cytoplasm	other	0	0	169.966	37	10	180	2	1	376	42.3	6.4	2762	10	8	1.478	1.2	0.02498	0.371815	81.5	73.3	97.5	105.9	120.4	129.3	116.3	77.9	97.8	6.68755e+07	6.02149e+07	8.01713e+07	8.69478e+07	9.95234e+07	1.06088e+08	9.59198e+07	6.39855e+07	8.02644e+07
P61161	Actin-related protein 2 OS=Mus musculus OX=10090 GN=Actr2 PE=1 SV=1	actin related protein 2	ACTR2	Plasma Membrane	other	0	0	262.465	49	13	311	13	1	394	44.7	6.74	4610	13	0	1.15	1.111	0.321626	0.83133	86.8	82.2	112.5	99.8	98.7	131.4	96.5	88.4	103.7	1.17274e+08	1.11015e+08	1.52871e+08	1.34543e+08	1.33197e+08	1.77805e+08	1.2989e+08	1.19885e+08	1.40639e+08
Q99JY9	Actin-related protein 3 OS=Mus musculus OX=10090 GN=Actr3 PE=1 SV=3	actin related protein 3	ACTR3	Plasma Membrane	other	0	0	273.212	72	20	417	20	1	418	47.3	5.88	5010	20	0	1.023	0.98	0.436003	0.655795	76.4	94.7	108.4	91.2	96.9	133	119.7	86.7	92.9	1.25348e+08	1.55698e+08	1.7773e+08	1.49584e+08	1.59056e+08	2.18006e+08	1.96363e+08	1.42312e+08	1.5226e+08
Q61288	Serine/threonine-protein kinase receptor R3 OS=Mus musculus OX=10090 GN=Acvrl1 PE=1 SV=2	activin A receptor like type 1	ACVRL1	Plasma Membrane	kinase	0	0	11.643	3	1	4	1	1	502	56.5	7.72	16	1	0	1.428	1.449	0.299494	0.323093	86.3	56.8	95.4	63.9	157.5	123.3	126.3	65.5	125.1	454088	304498	487400	327605	818235	635439	649333	333797	631680
Q99JW2	Aminoacylase-1 OS=Mus musculus OX=10090 GN=Acy1 PE=1 SV=1	aminoacylase 1	ACY1	Cytoplasm	peptidase	0	0	130.953	33	10	98	10	1	408	45.8	6.32	1724	10	0	2.44	2.266	0.008676	0.035212	51.2	53.2	75.9	129.8	107.1	147.9	120.5	83.4	131	3.10803e+07	3.23148e+07	4.61374e+07	7.8254e+07	6.49196e+07	8.98419e+07	7.33223e+07	5.03928e+07	7.90357e+07
Q91XE4	N-acyl-aromatic-L-amino acid amidohydrolase (carboxylate-forming) OS=Mus musculus OX=10090 GN=Acy3 PE=1 SV=1	aminoacylase 3	ACY3	Cytoplasm	enzyme	0	0	466.009	65	16	1079	16	1	318	35.3	5.5	17643	16	0	2.184	1.74	0.010665	0.056462	60.3	59.6	78.9	131.6	112.1	159.2	114.8	78.7	104.9	8.45798e+08	8.35493e+08	1.10673e+09	1.84583e+09	1.57214e+09	2.2353e+09	1.60985e+09	1.10372e+09	1.47095e+09
O35598	Disintegrin and metalloproteinase domain-containing protein 10 OS=Mus musculus OX=10090 GN=Adam10 PE=1 SV=2	ADAM metallopeptidase domain 10	ADAM10	Plasma Membrane	peptidase	1	0	409.292	31	23	835	23	1	749	83.9	7.94	12527	23	0	0.909	0.932	0.513716	0.367215	112.1	105.6	92.9	96	105.4	95.2	95.2	98.5	99.3	8.83163e+08	8.31655e+08	7.31362e+08	7.5565e+08	8.29904e+08	7.49402e+08	7.49221e+08	7.75956e+08	7.81487e+08
O88839	Disintegrin and metalloproteinase domain-containing protein 15 OS=Mus musculus OX=10090 GN=Adam15 PE=1 SV=2	ADAM metallopeptidase domain 15	ADAM15	Plasma Membrane	peptidase	1	0	33.019	9	4	33	4	1	864	92.6	6.54	220	4	0	0.917	0.895	0.936914	0.951759	106.8	88.3	105.3	129	78.9	96.5	145.8	55.1	94.3	3.69913e+06	2.98116e+06	3.58424e+06	4.37833e+06	2.72493e+06	3.28398e+06	4.91825e+06	2.00041e+06	3.2076e+06
Q9Z0F8	Disintegrin and metalloproteinase domain-containing protein 17 OS=Mus musculus OX=10090 GN=Adam17 PE=1 SV=3	ADAM metallopeptidase domain 17	ADAM17	Plasma Membrane	peptidase	1	0	43.233	10	5	53	5	1	827	93	5.94	576	5	0	1.09	1.285	0.755561	0.751115	87	87.2	124.7	93.5	95	97.8	115.9	86.8	112	1.11175e+07	1.11023e+07	1.59102e+07	1.19134e+07	1.21228e+07	1.24767e+07	1.47672e+07	1.10687e+07	1.42726e+07
Q61072	Disintegrin and metalloproteinase domain-containing protein 9 OS=Mus musculus OX=10090 GN=Adam9 PE=1 SV=2	ADAM metallopeptidase domain 9	ADAM9	Plasma Membrane	peptidase	1	0	33.063	6	3	29	3	1	845	92	7.47	135	3	0	1.036	1.044	0.683526	0.67237	101.4	103.2	88.6	106.2	105.1	90.8	105.9	110.8	87.9	6.88472e+06	7.00744e+06	6.04095e+06	7.21233e+06	7.1437e+06	6.16697e+06	7.19235e+06	7.52057e+06	5.96703e+06
Q8BLI0	ADAMTS-like protein 1 OS=Mus musculus OX=10090 GN=Adamtsl1 PE=2 SV=2	ADAMTS like 1	ADAMTSL1	Extracellular Space	other	0	0.091	1.71	0	1	1	1	1	1745	191.9	7.59	0	1	0	0.966	0.644	0.604732	0.481435	50.5	213.1	103.5	74.1	110.4	100	63.4	118.3	66.6	512689	2.16155e+06	1.05372e+06	751371	1.12734e+06	1.01397e+06	642490	1.2359e+06	675231
Q8R2V5	Arf-GAP with dual PH domain-containing protein 2 OS=Mus musculus OX=10090 GN=Adap2 PE=1 SV=1	ArfGAP with dual PH domains 2	ADAP2	Cytoplasm	other	0	0.016	3.208	4	1	5	1	1	381	44	9.14	17	1	0	0.971	1.016	0.998752	0.542932	138	19.7	151.8	157.2	18	134	152		129.3	620968	88642.3	686442	708305	80978.6	602979	692074		585919
Q9JI20	Double-stranded RNA-specific editase B2 OS=Mus musculus OX=10090 GN=Adarb2 PE=2 SV=2	adenosine deaminase RNA specific B2 (inactive)	ADARB2	Nucleus	enzyme	0	0.084	1.783	3	1	2	1	1	745	82.1	9.7	0	1	0
Q91WF3	Adenylate cyclase type 4 OS=Mus musculus OX=10090 GN=Adcy4 PE=1 SV=1	adenylate cyclase 4	ADCY4	Plasma Membrane	enzyme	12	0.006	4.489	2	1	6	1	1	1077	120.3	7.88	19	1	0	1.465	1.186	0.35418	0.304207	88.7	77	84.9	124.4	134.8	62.8	149.8	100.7	76.9	339333	302370	332915	474309	523662	241762	574200	401866	296137
P84309	Adenylate cyclase type 5 OS=Mus musculus OX=10090 GN=Adcy5 PE=1 SV=2	adenylate cyclase 5	ADCY5	Plasma Membrane	enzyme	11	0	53.261	6	8	44	1	1	1262	139	7.06	284	8	0	1.235	1.026	0.589191	>0.999999	77.8	67.2	136.8	84.2	156.3	96	79.8	57.4	144.6	193089	168862	339285	208876	388523	238799	198658	333998	359643
Q01341	Adenylate cyclase type 6 OS=Mus musculus OX=10090 GN=Adcy6 PE=1 SV=1	adenylate cyclase 6	ADCY6	Plasma Membrane	enzyme	12	0	123.566	14	15	132	8	1	1165	130.2	7.87	1030	15	7	1.328	1.553	0.283734	0.164384	105.9	76.8	73.3	119.5	86.6	102	127.9	88.9	119.3	5.49607e+07	4.01907e+07	3.79597e+07	6.20847e+07	4.49071e+07	5.31251e+07	6.62491e+07	4.6047e+07	6.26097e+07
P51830	Adenylate cyclase type 9 OS=Mus musculus OX=10090 GN=Adcy9 PE=1 SV=1	adenylate cyclase 9	ADCY9	Plasma Membrane	enzyme	11	0	61.546	8	8	60	8	1	1353	150.9	7.21	808	8	0	1.238	1.241	0.319871	0.041335	85.6	99	84.4	106	118.1	83.2	106.2	102	115.5	1.46179e+07	1.68978e+07	1.44093e+07	1.81071e+07	2.01929e+07	1.42056e+07	1.81897e+07	1.74199e+07	1.97137e+07
Q9QYC0	Alpha-adducin OS=Mus musculus OX=10090 GN=Add1 PE=1 SV=2	adducin 1	ADD1	Cytoplasm	other	0	0	127.369	31	13	129	13	1	735	80.6	5.9	1170	13	0	1.396	1.132	0.161986	0.446783	103	79	82.6	115.3	124.4	90.1	129.9	82.2	93.5	4.92246e+07	3.79904e+07	3.95329e+07	5.54811e+07	5.98788e+07	4.33638e+07	6.21214e+07	3.98802e+07	4.49774e+07
Q9QYB5	Gamma-adducin OS=Mus musculus OX=10090 GN=Add3 PE=1 SV=2	adducin 3	ADD3	Cytoplasm	other	0	0	83.088	15	8	81	8	1	706	78.7	5.95	1062	8	0	1.353	1.165	0.292203	0.623843	112.7	88.4	72	119.6	89.1	122.2	110.2	82.8	103	2.13714e+07	1.71424e+07	1.36337e+07	2.33946e+07	1.69325e+07	2.31521e+07	2.11803e+07	1.56668e+07	1.96086e+07
Q91ZV8	Adhesion G protein-coupled receptor A2 OS=Mus musculus OX=10090 GN=Adgra2 PE=1 SV=2	adhesion G protein-coupled receptor A2	ADGRA2	Plasma Membrane	G-protein coupled receptor	6	0	19.121	3	3	8	3	1	1336	143.1	8.47	76	3	0	1.152	1.249	0.32548	0.072693	90.2	68.3	98.9	114.4	103.9	82.8	126.8	102.1	112.6	2.05054e+06	1.62463e+06	2.24681e+06	2.59769e+06	2.36628e+06	1.89781e+06	2.88169e+06	2.3481e+06	2.57087e+06
Q9Z0M6	CD97 antigen OS=Mus musculus OX=10090 GN=Cd97 PE=1 SV=2	adhesion G protein-coupled receptor E5	ADGRE5	Plasma Membrane	G-protein coupled receptor	7	0	26.768	7	3	3	3	1	818	90.4	7.39	34	3	0	2.702	2.884	0.10216	0.24572	46.2	35.4	66.9	124.7	73.5	210.7	133.2	25.5	184	1.93907e+06	1.45296e+06	3.63463e+06	5.13658e+06	3.01525e+06	8.72223e+06	5.45927e+06	1.04617e+06	7.60273e+06
G5E8Q8	Adhesion G protein-coupled receptor F5 OS=Mus musculus OX=10090 GN=Adgrf5 PE=1 SV=1	adhesion G protein-coupled receptor F5	ADGRF5	Plasma Membrane	G-protein coupled receptor	7	0	123.999	10	8	51	8	1	1348	149.3	7.02	792	8	0	0.996	1.045	0.951481	0.287218	104.9	86.9	99.7	99.4	86.1	107.6	99.3	104.2	111.8	3.64627e+07	3.02496e+07	3.501e+07	3.454e+07	3.01473e+07	3.77853e+07	3.45402e+07	3.68311e+07	3.89605e+07
Q8K209	Adhesion G-protein coupled receptor G1 OS=Mus musculus OX=10090 GN=Adgrg1 PE=1 SV=1	adhesion G protein-coupled receptor G1	ADGRG1	Plasma Membrane	G-protein coupled receptor	7	0	15.183	3	2	8	2	1	687	77.2	8.59	208	2	0	1.352	1.817	0.142854	0.07078	62.8	98	70.7	92.7	127.7	95.6	131.5	128.5	92.4	7.39846e+06	1.15461e+07	8.33285e+06	1.09589e+07	1.50457e+07	1.12968e+07	1.55461e+07	1.53522e+07	1.08884e+07
B7ZCC9	Adhesion G-protein coupled receptor G4 OS=Mus musculus OX=10090 GN=Adgrg4 PE=3 SV=1	adhesion G protein-coupled receptor G4	ADGRG4	Plasma Membrane	G-protein coupled receptor	7	0.066	1.96	1	1	1	1	1	3073	334	6.62	0	1	0
Q8BM96	Adhesion G-protein coupled receptor G7 OS=Mus musculus OX=10090 GN=Adgrg7 PE=1 SV=2	adhesion G protein-coupled receptor G7	ADGRG7	Plasma Membrane	G-protein coupled receptor	8	0.074	1.885	4	1	1	1	1	785	87.6	8.87	0	1	0	1.903	1.545	0.654335	0.683911	85.6			162.8	322.5	33.1	214.6		81.5	171920			314041	622051	63893.2	413868		157166
P00329	Alcohol dehydrogenase 1 OS=Mus musculus OX=10090 GN=Adh1 PE=1 SV=2	alcohol dehydrogenase 1C (class I), gamma polypeptide	ADH1C	Cytoplasm	enzyme	0	0	356.608	74	23	632	23	1	375	39.7	8.1	9398	23	0	1.306	0.88	0.403319	0.90765	128.6	54.6	95.3	124.5	87.6	140.8	118.9	66	83.8	5.55868e+08	2.3579e+08	4.11623e+08	5.38028e+08	3.78386e+08	6.08146e+08	5.14169e+08	2.84936e+08	3.61965e+08
P28474	Alcohol dehydrogenase class-3 OS=Mus musculus OX=10090 GN=Adh5 PE=1 SV=3	alcohol dehydrogenase 5 (class III), chi polypeptide	ADH5	Cytoplasm	enzyme	0	0	151.051	49	13	105	12	1	374	39.5	7.25	972	13	0	2.089	1.533	0.344113	0.528834	113.6	53.9	73.1	152.8	53.4	157.2	112.1	58.9	125	2.9638e+07	1.41761e+07	2.01767e+07	3.98654e+07	1.40352e+07	4.1143e+07	2.94807e+07	1.547e+07	3.2834e+07
Q64437	Alcohol dehydrogenase class 4 mu/sigma chain OS=Mus musculus OX=10090 GN=Adh7 PE=2 SV=2	alcohol dehydrogenase 7 (class IV), mu or sigma polypeptide	ADH7	Cytoplasm	enzyme	0	0	10.115	3	2	40	1	1	374	39.9	7.85	37	2	0	1.129	0.852	0.291723	0.231819	103.3	103.7	95.2	116.7	135.7	94.4	88	101.6	61.5	3.11213e+07	3.06339e+07	2.80634e+07	3.43996e+07	4.10355e+07	2.85167e+07	2.61808e+07	3.01232e+07	1.85838e+07
Q8R0N6	Hydroxyacid-oxoacid transhydrogenase, mitochondrial OS=Mus musculus OX=10090 GN=Adhfe1 PE=1 SV=2	alcohol dehydrogenase iron containing 1	ADHFE1	Cytoplasm	enzyme	0	0	104.71	35	7	63	7	1	465	49.9	7.58	430	7	0	1.656	1.545	0.075568	0.146968	72.7	66.6	100.3	95	132.1	120.4	86.7	113.9	112.3	1.41221e+07	1.25134e+07	1.80107e+07	1.6951e+07	2.24032e+07	2.03749e+07	1.86236e+07	1.93624e+07	1.93532e+07
Q91VH1	Adiponectin receptor protein 1 OS=Mus musculus OX=10090 GN=Adipor1 PE=1 SV=1	adiponectin receptor 1	ADIPOR1	Plasma Membrane	transmembrane receptor	7	0.061	2.011	5	1	2	1	1	375	42.3	7.02	25	1	0	0.973	1.208	0.767339	0.654208	67.6	89.9	135.1	87.5	57.9	121.5	108.6	70.4	161.5	54451.2	72512.1	110170	71819.5	46695	97930.8	88478.7	57337.5	130806
P55264	Adenosine kinase OS=Mus musculus OX=10090 GN=Adk PE=1 SV=2	adenosine kinase	ADK	Nucleus	kinase	0	0	65.399	24	8	43	8	1	361	40.1	6.21	394	8	0	1.446	1.251	0.150017	0.550641	106	76.3	73.1	156.9	110.3	98.5	101.8	81.7	95.4	1.89716e+07	1.3483e+07	1.36824e+07	2.82075e+07	1.96288e+07	1.88236e+07	2.02561e+07	1.44588e+07	1.81444e+07
Q8VDL4	ADP-dependent glucokinase OS=Mus musculus OX=10090 GN=Adpgk PE=1 SV=2	ADP dependent glucokinase	ADPGK	Plasma Membrane	kinase	0	0	12.735	7	3	10	3	1	496	53.9	5.62	126	3	0	1.182	0.884	0.361687	0.802714	98.6	59.3	118.6	85.7	159	116.6	81.8	87.2	93.3	4.24044e+06	2.54024e+06	5.07745e+06	3.6983e+06	6.8529e+06	5.11208e+06	3.49925e+06	3.73131e+06	4.00107e+06
P30545	Alpha-2B adrenergic receptor OS=Mus musculus OX=10090 GN=Adra2b PE=1 SV=2	adrenoceptor alpha 2B	ADRA2B	Plasma Membrane	G-protein coupled receptor	7	0.001	8.475	2	1	4	1	1	450	50.1	8.78	111	1	0	0.949	0.992	0.540777	0.806677	101.7	87.7	112.5	89.2	100.3	96.6	124.5	100.9	86.8	6.74693e+06	5.81939e+06	7.47587e+06	5.91904e+06	6.73357e+06	6.41399e+06	8.25994e+06	6.77951e+06	5.75624e+06
Q9JKV1	Proteasomal ubiquitin receptor ADRM1 OS=Mus musculus OX=10090 GN=Adrm1 PE=1 SV=2	adhesion regulating molecule 1	ADRM1	Plasma Membrane	other	0	0	12.101	9	4	29	4	1	407	42	5.07	255	4	0	0.903	1.044	0.917498	0.449053	91.7	121.9	96.2	86.8	145.6	84.7	103.8	100.5	68.8	2.33113e+07	3.10473e+07	2.43924e+07	2.21794e+07	3.68774e+07	2.14915e+07	2.63702e+07	2.5418e+07	1.74278e+07
P54822	Adenylosuccinate lyase OS=Mus musculus OX=10090 GN=Adsl PE=1 SV=2	adenylosuccinate lyase	ADSL	Cytoplasm	enzyme	0	0	148.753	28	10	92	10	1	484	54.8	7.27	1437	10	0	1.441	1.269	0.067403	0.542813	104	68.6	80.5	116.1	142.7	106.5	102.3	74.3	105	2.56216e+07	1.68373e+07	1.97987e+07	2.85722e+07	3.52431e+07	2.62038e+07	2.51441e+07	1.83592e+07	2.58637e+07
P28650	Adenylosuccinate synthetase isozyme 1 OS=Mus musculus OX=10090 GN=Adssl1 PE=1 SV=2	adenylosuccinate synthase 1	ADSS1	Cytoplasm	enzyme	0	0	10.767	3	1	1	1	1	457	50.2	8.43	40	1	0	1.258	1.032	0.214132	0.431078	87.3	94.3	78.1	136.2	109.8	83.8	140.7	79.8	90.1	984257	1.07302e+06	877978	1.53082e+06	1.23344e+06	942639	1.58096e+06	913017	1.01996e+06
P46664	Adenylosuccinate synthetase isozyme 2 OS=Mus musculus OX=10090 GN=Adss PE=1 SV=2	adenylosuccinate synthase 2	ADSS2	Cytoplasm	enzyme	0	0	58.37	13	4	39	4	1	456	50	6.38	548	4	0	1.563	1.549	0.003484	0.080843	77.6	72.5	67.9	132.5	113.3	110.5	132.9	80.6	112.3	9.45233e+06	8.82844e+06	8.32027e+06	1.61201e+07	1.38041e+07	1.34539e+07	1.61793e+07	9.90469e+06	1.36698e+07
Q9QZQ1	Afadin OS=Mus musculus OX=10090 GN=Afdn PE=1 SV=3	afadin, adherens junction formation factor	AFDN	Nucleus	other	0	0	102.753	9	11	57	11	1	1820	206.4	6.32	1168	11	0	0.816	0.863	0.864361	0.585474	77.8	121.3	112.4	83.8	125.8	91.8	101	97.1	89	1.22859e+07	1.91721e+07	1.78806e+07	1.33041e+07	1.98813e+07	1.45807e+07	1.61509e+07	1.53427e+07	1.41669e+07
Q3V384	AFG1-like ATPase OS=Mus musculus OX=10090 GN=Afg1l PE=1 SV=1	AFG1 like ATPase	AFG1L	Cytoplasm	other	0	0	16.544	8	4	27	4	1	480	54.3	8.03	65	4	0	0.92	0.826	0.258269	0.202369	106.6	96.5	143.8	98.1	82.4	104.1	106.4	88	74.1	2.07273e+07	1.8757e+07	2.79948e+07	1.91582e+07	1.60091e+07	2.0223e+07	2.0712e+07	1.71079e+07	1.44216e+07
Q8JZQ2	AFG3-like protein 2 OS=Mus musculus OX=10090 GN=Afg3l2 PE=1 SV=1	AFG3 like matrix AAA peptidase subunit 2	AFG3L2	Cytoplasm	peptidase	2	0.043	2.278	1	1	4	1	1	802	89.5	8.6	0	1	0	0.917	0.794	0.442912	0.122229	131.8	102	113.4	127.5	62.1	104	105.5	90.1	63.6	1.40168e+07	1.08128e+07	1.20149e+07	1.36333e+07	6.679e+06	1.10399e+07	1.12207e+07	9.76635e+06	6.75407e+06
Q80WT5	Aftiphilin OS=Mus musculus OX=10090 GN=Aftph PE=1 SV=2	aftiphilin	AFTPH	Cytoplasm	other	0	0.009	4.074	1	1	1	1	1	931	101.1	4.5	0	1	0	1.11	5.858	0.727397	0.430855	62.4	369.2	34	69.2				365.3		754519	4.46716e+06	411378	837401				4.41978e+06
Q8BXK8	Arf-GAP with GTPase, ANK repeat and PH domain-containing protein 1 OS=Mus musculus OX=10090 GN=Agap1 PE=1 SV=1	ArfGAP with GTPase domain, ankyrin repeat and PH domain 1	AGAP1	Cytoplasm	enzyme	0	0	37.224	4	2	24	2	1	857	94.4	7.94	151	2	0	1.515	1.137	0.039289	0.784323	84.5	71.5	100.2	128	141.4	106.2	103.7	96	68.4	1.29039e+06	1.07544e+06	1.6082e+06	1.90746e+06	2.14676e+06	1.58796e+06	1.62048e+06	1.46381e+06	1.14733e+06
Q80WC7	Arf-GAP domain and FG repeat-containing protein 2 OS=Mus musculus OX=10090 GN=Agfg2 PE=1 SV=1	ArfGAP with FG repeats 2	AGFG2	Other	other	0	0	11.183	4	1	4	1	1	479	48.9	9.1	108	1	0	1.184	1.23	0.267998	0.246581	95.7	90	39.4	106.5	143.2	76.7	161.1	110.6	76.8	1.20584e+06	1.13153e+06	527814	1.33917e+06	1.80283e+06	963993	2.02584e+06	1.3913e+06	967688
Q9ESW4	Acylglycerol kinase, mitochondrial OS=Mus musculus OX=10090 GN=Agk PE=1 SV=1	acylglycerol kinase	AGK	Cytoplasm	kinase	0	0	15.252	6	1	9	1	1	421	46.9	8.4	67	1	0	0.938	0.672	0.909161	0.948486	110.1	18.7	221.6	78.7		135.4	67.2	74	194.4	844059	142364	1.67735e+06	599409		1.05866e+06	509306	559885	1.49056e+06
A2AS89	Agmatinase, mitochondrial OS=Mus musculus OX=10090 GN=Agmat PE=1 SV=1	agmatinase	AGMAT	Cytoplasm	enzyme	0	0.065	1.967	12	1	1	1	1	358	38.2	7.87	0	1	0	Present in 4h only	Present in 8h only						238.7	230		298.7	132.6					76712.4	73897.2		95993.1	42601.5
O35083	1-acyl-sn-glycerol-3-phosphate acyltransferase alpha OS=Mus musculus OX=10090 GN=Agpat1 PE=1 SV=1	1-acylglycerol-3-phosphate O-acyltransferase 1	AGPAT1	Cytoplasm	enzyme	2	0	106.313	36	6	157	6	1	285	31.7	9.14	2215	6	0	1.069	0.997	0.790309	0.957701	136.2	76.2	91.6	98	108.8	80.3	148.1	91.4	69.5	5.17654e+07	2.65815e+07	3.21464e+07	3.42502e+07	3.79298e+07	2.80139e+07	5.29059e+07	3.19611e+07	2.42265e+07
Q8K3K7	1-acyl-sn-glycerol-3-phosphate acyltransferase beta OS=Mus musculus OX=10090 GN=Agpat2 PE=1 SV=1	1-acylglycerol-3-phosphate O-acyltransferase 2	AGPAT2	Cytoplasm	enzyme	3	0	23.008	18	3	3	3	1	278	31	8.88	69	3	0	1.781	1.496	0.010104	0.114626	81.9	70.2	38.9	118.8	134	125.1	79.8	105.1	146.2	3.60931e+06	3.73351e+06	2.60074e+06	5.55027e+06	5.96598e+06	5.58414e+06	3.6047e+06	4.72161e+06	6.78445e+06
Q9D517	1-acyl-sn-glycerol-3-phosphate acyltransferase gamma OS=Mus musculus OX=10090 GN=Agpat3 PE=1 SV=2	1-acylglycerol-3-phosphate O-acyltransferase 3	AGPAT3	Cytoplasm	enzyme	3	0	132.567	29	13	221	13	1	376	43.3	8.51	2846	13	0	1.1	1.39	0.936543	0.861348	82.2	71.7	143.3	90.4	79.3	121	114.3	75.8	121.9	1.22221e+08	1.06966e+08	2.13016e+08	1.34435e+08	1.18053e+08	1.79788e+08	1.69946e+08	1.12761e+08	1.8124e+08
Q8C0I1	Alkyldihydroxyacetonephosphate synthase, peroxisomal OS=Mus musculus OX=10090 GN=Agps PE=1 SV=1	alkylglycerone phosphate synthase	AGPS	Cytoplasm	enzyme	0	0	259.118	42	19	242	19	1	645	71.6	7.5	4305	19	0	1.158	1.169	0.478864	0.753739	75.5	86.2	109.6	99.9	170.2	73	76	108.7	100.8	8.82994e+07	1.00955e+08	1.28128e+08	1.16914e+08	1.99049e+08	8.53705e+07	8.88316e+07	1.27126e+08	1.17894e+08
A2ASQ1	Agrin OS=Mus musculus OX=10090 GN=Agrn PE=1 SV=1	agrin	AGRN	Plasma Membrane	other	1	0	70.845	4	4	32	4	1	1950	207.4	6.32	513	4	0	1.499	0.929	0.15273	0.821867	94.5	65.6	102.9	141.7	152.7	88.8	87.8	73.7	92.4	5.45154e+06	3.78261e+06	5.93454e+06	8.22845e+06	8.80695e+06	5.13688e+06	5.07109e+06	4.3233e+06	5.35387e+06
P11859	Angiotensinogen OS=Mus musculus OX=10090 GN=Agt PE=1 SV=1	angiotensinogen	AGT	Extracellular Space	growth factor	0	0	19.161	5	2	8	2	1	477	52	5.44	296	2	0	1.998	3.361	0.071296	0.110814	53.2	33.3	67.9	123.5	67.1	106.2	178.7	57.6	212.5	1.36681e+06	855705	1.74409e+06	3.16362e+06	1.71955e+06	2.73814e+06	4.6149e+06	1.48585e+06	5.44477e+06
Q9WVK0	Type-1 angiotensin II receptor-associated protein OS=Mus musculus OX=10090 GN=Agtrap PE=1 SV=2	angiotensin II receptor associated protein	AGTRAP	Plasma Membrane	G-protein coupled receptor	3	0	29.262	25	1	13	1	1	161	17.5	5.73	36	1	0	0.991	1.531	0.517019	0.845875	64.6	61	232.6	78.6		52.2	99	51.5	260.5	740259	689986	2.91807e+06	889919		592558	1.28563e+06	586123	2.94043e+06
Q3UEG6	Alanine--glyoxylate aminotransferase 2, mitochondrial OS=Mus musculus OX=10090 GN=Agxt2 PE=1 SV=1	alanine--glyoxylate aminotransferase 2	AGXT2	Cytoplasm	enzyme	0	0	44.754	15	6	46	6	1	513	57.1	7.93	345	6	0	1.105	0.98	0.968301	0.790103	105.1	68.8	130.8	116.1	44.8	148.3	111.8	71.3	103	9.43862e+06	6.25158e+06	1.17705e+07	1.04418e+07	4.02261e+06	1.33157e+07	1.00398e+07	6.41018e+06	9.33888e+06
P50247	Adenosylhomocysteinase OS=Mus musculus OX=10090 GN=Ahcy PE=1 SV=3	adenosylhomocysteinase	AHCY	Cytoplasm	enzyme	0	0	324.308	64	25	554	23	1	432	47.7	6.54	8933	25	0	1.494	1.303	0.128432	0.55902	76.4	65.5	103.8	114.1	99.1	166.2	99.6	71.5	103.7	3.06361e+08	2.62919e+08	4.1603e+08	4.57288e+08	3.97211e+08	6.66001e+08	3.9906e+08	2.86809e+08	4.15614e+08
Q80SW1	S-adenosylhomocysteine hydrolase-like protein 1 OS=Mus musculus OX=10090 GN=Ahcyl1 PE=1 SV=1	adenosylhomocysteinase like 1	AHCYL1	Cytoplasm	enzyme	0	0	276.678	57	24	640	8	1	530	58.9	6.89	9342	24	0	1.09	1.105	0.392235	0.515609	90.1	89.5	105.1	93.9	119.7	98.3	99.7	114.1	89.6	5.05584e+07	5.02014e+07	5.8948e+07	5.26421e+07	6.71506e+07	5.51188e+07	5.59396e+07	6.40816e+07	5.02434e+07
Q68FL4	Putative adenosylhomocysteinase 3 OS=Mus musculus OX=10090 GN=Ahcyl2 PE=1 SV=1	adenosylhomocysteinase like 2	AHCYL2	ER	enzyme	0	0	440.22	52	27	838	11	1	613	66.9	7.36	14160	27	14	0.931	0.855	0.8525	0.820061	80.4	113.4	106.9	94.5	99.5	113.6	91.5	111.8	88.3	6.3955e+08	9.025e+08	8.51553e+08	7.52087e+08	7.93073e+08	9.04637e+08	7.27841e+08	8.89939e+08	7.02658e+08
Q8BK64	Activator of 90 kDa heat shock protein ATPase homolog 1 OS=Mus musculus OX=10090 GN=Ahsa1 PE=1 SV=2	activator of HSP90 ATPase activity 1	AHSA1	Cytoplasm	other	0	0	59.507	20	7	74	7	1	338	38.1	5.53	521	7	0	0.998	0.916	0.498755	0.746419	103.1	82.6	110.7	101.9	111.5	102.9	94.4	92.3	100.6	4.4567e+07	3.57157e+07	4.77616e+07	4.39717e+07	4.80852e+07	4.44229e+07	4.07086e+07	3.98216e+07	4.34347e+07
P29699	Alpha-2-HS-glycoprotein OS=Mus musculus OX=10090 GN=Ahsg PE=1 SV=1	alpha 2-HS glycoprotein	AHSG	Extracellular Space	other	0	0	192.028	46	10	169	10	1	345	37.3	6.51	2615	10	0	1.659	3.805	0.10514	0.096982	42.5	39.7	23	138.9	65.9	61.8	151.1	78	299	2.82014e+07	2.63385e+07	1.52871e+07	9.23134e+07	4.37282e+07	4.10046e+07	1.00297e+08	5.23627e+07	1.9859e+08
Q91Z58	Uncharacterized protein C6orf132 homolog OS=Mus musculus OX=10090 PE=1 SV=2	expressed sequence AI661453	AI661453	Other	other	0	0.001	9.02	2	2	3	2	1	1206	127.8	9.36	72	2	0	0.843	0.939	0.80304	0.537922	85.8	140.4	100.4	42.8	167.2	84.6	62.6	122	94.2	2.72372e+06	4.47886e+06	3.17531e+06	1.34904e+06	5.30384e+06	2.6686e+06	1.97059e+06	3.90466e+06	2.97226e+06
Q9Z0X1	Apoptosis-inducing factor 1, mitochondrial OS=Mus musculus OX=10090 GN=Aifm1 PE=1 SV=1	apoptosis inducing factor mitochondria associated 1	AIFM1	Cytoplasm	enzyme	0	0	324.216	43	20	445	20	1	612	66.7	9.17	8888	20	0	0.821	0.998	0.213912	0.41707	88.6	105.1	159	93.2	86.3	76.7	80.8	105	105.2	2.69902e+08	3.20335e+08	4.85095e+08	2.84113e+08	2.63548e+08	2.33791e+08	2.46148e+08	3.19946e+08	3.20728e+08
Q8BUE4	Apoptosis-inducing factor 2 OS=Mus musculus OX=10090 GN=Aifm2 PE=1 SV=1	apoptosis inducing factor mitochondria associated 2	AIFM2	Cytoplasm	enzyme	1	0	27.462	10	2	29	2	1	373	40.6	8.98	239	2	0	0.848	0.945	0.171045	0.380109	111.3	93.7	133.5	100.2	68.4	94.4	105.1	85.4	108	6.46983e+06	5.44021e+06	7.75888e+06	5.82353e+06	3.98961e+06	5.50241e+06	6.14415e+06	5.01412e+06	6.3041e+06
P31230	Aminoacyl tRNA synthase complex-interacting multifunctional protein 1 OS=Mus musculus OX=10090 GN=Aimp1 PE=1 SV=2	aminoacyl tRNA synthetase complex interacting multifunctional protein 1	AIMP1	Extracellular Space	cytokine	0	0	188.783	51	11	148	11	1	310	34	8.35	1614	11	0	1.065	0.621	0.846011	0.086752	90	109.3	148.6	77.6	138.5	116.4	67.8	88.6	63.2	8.8261e+07	1.07382e+08	1.4569e+08	7.63661e+07	1.3591e+08	1.14289e+08	6.64455e+07	8.70855e+07	6.20616e+07
Q8R010	Aminoacyl tRNA synthase complex-interacting multifunctional protein 2 OS=Mus musculus OX=10090 GN=Aimp2 PE=1 SV=2	aminoacyl tRNA synthetase complex interacting multifunctional protein 2	AIMP2	Plasma Membrane	other	0	0	156.025	55	8	170	8	1	320	35.4	7.83	1789	8	0	1.333	0.779	0.859469	0.168169	87.7	94.6	165	74.1	129.8	126.1	73.7	76.1	72.9	3.80241e+07	4.09849e+07	7.14662e+07	3.21542e+07	5.63957e+07	5.46862e+07	3.19981e+07	3.29565e+07	3.15641e+07
O08915	AH receptor-interacting protein OS=Mus musculus OX=10090 GN=Aip PE=1 SV=1	aryl hydrocarbon receptor interacting protein	AIP	Nucleus	transcription regulator	0	0	12.589	4	1	12	1	1	330	37.6	6.4	356	1	0	1.404	1.193	0.083302	0.326844	74.2	96.9	80.9	113.6	132.8	94.6	130.7	79.8	96.5	2.80369e+06	3.65245e+06	3.04723e+06	4.2714e+06	4.99868e+06	3.56144e+06	4.91353e+06	3.02021e+06	3.63996e+06
Q9R0Y5	Adenylate kinase isoenzyme 1 OS=Mus musculus OX=10090 GN=Ak1 PE=1 SV=1	adenylate kinase 1	AK1	Cytoplasm	kinase	0	0	55.43	36	5	59	5	1	194	21.5	5.81	754	5	0	1.476	1.372	0.075016	0.376179	100.7	74.3	78.1	115.3	127.8	97.1	127	72.5	107.1	2.63049e+07	1.94484e+07	2.04787e+07	3.01074e+07	3.34783e+07	2.53693e+07	3.31685e+07	1.89812e+07	2.79775e+07
Q9WTP6	Adenylate kinase 2, mitochondrial OS=Mus musculus OX=10090 GN=Ak2 PE=1 SV=5	adenylate kinase 2	AK2	Cytoplasm	kinase	0	0	210.425	58	13	327	13	1	239	26.5	7.39	5084	13	0	0.924	0.97	0.491003	0.362131	101	95.7	121.4	112.8	86.9	93.3	98	104.5	86.5	1.18903e+08	1.12701e+08	1.42675e+08	1.32545e+08	1.02263e+08	1.10056e+08	1.15154e+08	1.22972e+08	1.01654e+08
Q9WTP7	GTP:AMP phosphotransferase AK3, mitochondrial OS=Mus musculus OX=10090 GN=Ak3 PE=1 SV=3	adenylate kinase 3	AK3	Cytoplasm	kinase	0	0	99.968	53	9	98	9	1	227	25.4	8.84	1161	9	0	1.147	1.133	0.531935	0.953467	116	96	81	114.7	110.1	93	119	108.7	61.5	5.47916e+07	4.52311e+07	3.82633e+07	5.43034e+07	5.1887e+07	4.39905e+07	5.63051e+07	5.1224e+07	2.89588e+07
Q9WUR9	Adenylate kinase 4, mitochondrial OS=Mus musculus OX=10090 GN=Ak4 PE=1 SV=1	adenylate kinase 4	AK4	Cytoplasm	kinase	0	0	217.765	65	10	416	10	1	223	25	7.53	4261	10	0	0.959	0.983	0.815313	0.942082	89.1	102.1	106.8	97.9	127.1	83.4	100.4	128.8	64.3	1.66967e+08	1.91232e+08	1.99904e+08	1.83297e+08	2.38087e+08	1.56335e+08	1.88007e+08	2.41302e+08	1.20485e+08
O08715	A-kinase anchor protein 1, mitochondrial OS=Mus musculus OX=10090 GN=Akap1 PE=1 SV=4	A-kinase anchoring protein 1	AKAP1	Cytoplasm	other	1	0.011	3.703	1	1	2	1	1	857	92.1	5.02	0	1	0	0.922	0.861	0.735956	0.492658	74.8	114	131.4	105.2	110.8	84	81.5	98.1	100.4	1.14573e+06	1.73087e+06	1.98498e+06	1.60404e+06	1.67725e+06	1.28122e+06	1.24175e+06	1.48228e+06	1.52842e+06
O88845	A-kinase anchor protein 10, mitochondrial OS=Mus musculus OX=10090 GN=Akap10 PE=1 SV=3	A-kinase anchoring protein 10	AKAP10	Cytoplasm	other	0	0	22.501	8	4	17	4	1	662	73.6	6.79	151	4	0	0.506	0.861	0.14453	0.282236	145	121.3	112.2	46.4	126.7	61.4	53.1	129.6	104.4	9.87674e+06	8.06932e+06	7.48327e+06	3.95147e+06	8.30608e+06	4.05488e+06	4.48719e+06	8.59476e+06	6.8518e+06
Q9WTQ5	A-kinase anchor protein 12 OS=Mus musculus OX=10090 GN=Akap12 PE=1 SV=1	A-kinase anchoring protein 12	AKAP12	Cytoplasm	transporter	0	0	25.98	2	3	39	3	1	1684	180.6	4.44	604	3	0	1.215	1.483	0.096512	0.058744	67.6	78.2	89.1	90.5	95.1	118.5	116.1	97.1	147.8	3.49904e+06	4.05993e+06	4.59618e+06	4.71041e+06	4.90662e+06	6.12496e+06	6.026e+06	5.03202e+06	7.63434e+06
E9Q394	A-kinase anchor protein 13 OS=Mus musculus OX=10090 GN=Akap13 PE=1 SV=1	A-kinase anchoring protein 13	AKAP13	Cytoplasm	other	0	0	11.241	1	1	11	1	1	2776	303.8	5.38	20	1	0	1.098	1.303	0.680519	0.17746	114.8	26.6	97.4	106.9	54.5	122.5	139.9	110.7	126.8	587787	137531	502026	548064	283100	637519	716745	568531	649489
Q70FJ1	A-kinase anchor protein 9 OS=Mus musculus OX=10090 GN=Akap9 PE=1 SV=2	A kinase (PRKA) anchor protein (yotiao) 9	Akap9	Cytoplasm	other	0	0	64.836	4	12	80	11	1	3797	435.9	5.03	698	12	0	1.055	1.152	0.836665	0.594058	88	156.1	79.1	92.8	131.8	79.5	101.3	111.9	59.5	1.59831e+07	2.87795e+07	1.43684e+07	1.69187e+07	2.38766e+07	1.45196e+07	1.843e+07	2.14215e+07	1.08519e+07
Q9JII6	Alcohol dehydrogenase [NADP(+)] OS=Mus musculus OX=10090 GN=Akr1a1 PE=1 SV=3	aldo-keto reductase family 1 member A1	AKR1A1	Cytoplasm	enzyme	0	0	554.055	85	26	1362	26	1	325	36.6	7.39	21043	26	0	1.712	1.386	0.002268	0.187414	90.6	73.7	66.4	126	129.5	126.2	108.2	77.1	102.2	1.33799e+09	1.08843e+09	9.80426e+08	1.86007e+09	1.91203e+09	1.86316e+09	1.59671e+09	1.13748e+09	1.50937e+09
P45376	Aldose reductase OS=Mus musculus OX=10090 GN=Akr1b1 PE=1 SV=3	aldo-keto reductase family 1 member B	AKR1B1	Cytoplasm	enzyme	0	0	120.037	55	16	293	15	1	316	35.7	7.18	5320	16	1	1.597	1.252	0.003974	0.031766	78.1	79.3	77.5	124.6	132.9	108.1	112.2	89.5	97.8	2.30985e+08	2.34885e+08	2.29192e+08	3.69004e+08	3.93031e+08	3.20126e+08	3.31773e+08	2.65272e+08	2.89031e+08
P45377	Aldose reductase-related protein 2 OS=Mus musculus OX=10090 GN=Akr1b8 PE=1 SV=2	aldo-keto reductase family 1 member B10	AKR1B10	Cytoplasm	enzyme	0	0	42.296	20	7	36	2	1	316	36.1	6.37	404	7	0	1.618	1.189	0.795523	0.683011	170.2	53.7	79.8	152.5	59.5	129.1	96.4	63.8	94.9	1.06354e+06	335836	498652	964746	372403	816660	606729	399304	596762
P21300	Aldose reductase-related protein 1 OS=Mus musculus OX=10090 GN=Akr1b7 PE=1 SV=4	aldo-keto reductase family 1, member B7	Akr1b7	Cytoplasm	enzyme	0	0	130.676	60	15	74	10	1	316	36	7.25	909	15	3	1.534	1.607	0.378404	0.377646	3.5	2.2	860.8	5.4	5.2	6.9	5.8	4.5	5.7	1.13917e+06	992174	2.68703e+08	1.90053e+06	1.64672e+06	2.21729e+06	1.80097e+06	1.40724e+06	1.77245e+06
Q91WR5	Aldo-keto reductase family 1 member C21 OS=Mus musculus OX=10090 GN=Akr1c21 PE=1 SV=2	aldo-keto reductase family 1 member C2	AKR1C1/AKR1C2	Cytoplasm	enzyme	0	0	419.708	82	20	1074	16	1	323	36.9	7.18	13626	20	5	1.693	1.354	0.000218	0.136747	82.1	73.5	73.5	124.4	118.1	125	124.5	79.5	99.4	1.00226e+09	8.96572e+08	8.96532e+08	1.51775e+09	1.44149e+09	1.52575e+09	1.51936e+09	9.70514e+08	1.21431e+09
Q8VC28	Aldo-keto reductase family 1 member C13 OS=Mus musculus OX=10090 GN=Akr1c13 PE=1 SV=2	aldo-keto reductase family 1, member C13	Akr1c12/Akr1c13	Other	enzyme	0	0.009	4.041	5	2	19	1	1	323	37	7.08	290	2	0	1.41	0.776	0.128873	0.915399	95	111	62	138.7	133.9	101.6	135.9	73.8	48.2	1.18298e+06	1.37642e+06	766984	1.71777e+06	1.73854e+06	1.25831e+06	1.68407e+06	912854	719269
Q8K023	Aldo-keto reductase family 1 member C18 OS=Mus musculus OX=10090 GN=Akr1c18 PE=1 SV=2	aldo-keto reductase family 1 member C3	AKR1C3	Cytoplasm	enzyme	0	0	62.478	17	7	281	3	1	323	37.2	6.46	3507	7	0	3.324	2.904	0.001947	0.058412	45.1	33.4	48.4	161.5	117.5	150	131.1	61.6	151.4	7.21886e+06	5.48073e+06	7.94854e+06	2.55354e+07	1.85771e+07	2.37296e+07	2.08208e+07	1.01379e+07	2.39968e+07
Q8CG76	Aflatoxin B1 aldehyde reductase member 2 OS=Mus musculus OX=10090 GN=Akr7a2 PE=1 SV=3	aldo-keto reductase family 7 member A2	AKR7A2	Cytoplasm	enzyme	0	0	218.671	33	8	314	8	1	367	40.6	8.12	7380	8	0	1.694	1.342	0.000489	0.015028	73.5	74.8	69.1	117.1	133.6	124.5	116.3	92.5	98.6	1.49212e+08	1.51761e+08	1.40204e+08	2.37429e+08	2.71258e+08	2.52393e+08	2.35923e+08	1.87494e+08	2.00088e+08
Q9D1F4	Proline-rich AKT1 substrate 1 OS=Mus musculus OX=10090 GN=Akt1s1 PE=1 SV=1	AKT1 substrate 1	AKT1S1	Cytoplasm	other	0	0.001	7.39	5	1	10	1	1	257	27.5	4.72	33	1	0	1.086	0.901	0.81747	0.945392	76.8	106.6	112.2	68.3	127.1	115.8	96.1	103.8	93.2	2.7757e+06	3.85999e+06	4.04371e+06	2.48206e+06	4.59255e+06	4.17322e+06	3.47933e+06	3.77252e+06	3.3581e+06
Q64362	AKT-interacting protein OS=Mus musculus OX=10090 GN=Aktip PE=1 SV=1	AKT interacting protein	AKTIP	Cytoplasm	other	0	0	30.978	15	2	11	2	1	292	32.9	9.31	125	2	0	0.956	1.034	0.779898	0.942706	141.6	59	106	121.1	56.8	101.3	142.9	61.8	109.6	5.67083e+06	2.52116e+06	4.24675e+06	4.92492e+06	2.43692e+06	4.05539e+06	5.73344e+06	2.6232e+06	4.39121e+06
P10518	Delta-aminolevulinic acid dehydratase OS=Mus musculus OX=10090 GN=Alad PE=1 SV=1	aminolevulinate dehydratase	ALAD	Cytoplasm	enzyme	0	0	54.843	25	4	47	4	1	330	36	6.79	635	4	0	1.313	0.915	0.016416	0.71026	92.1	93.4	69	120.9	139.5	118.1	80.3	84.3	102.4	1.43213e+07	1.45354e+07	1.07649e+07	1.88898e+07	2.16986e+07	1.838e+07	1.34668e+07	1.31104e+07	1.59384e+07
Q8VC19	5-aminolevulinate synthase, nonspecific, mitochondrial OS=Mus musculus OX=10090 GN=Alas1 PE=1 SV=2	5'-aminolevulinate synthase 1	ALAS1	Cytoplasm	enzyme	0	0.001	7.134	2	1	1	1	1	642	71	8.53	30	1	0	0.621	0.927	0.037425	0.604232	98.1	144.1	116.6	70.6	85.5	72.4	108.1	143.5	61.1	991143	1.48736e+06	1.17826e+06	728596	855698	736090	1.0997e+06	1.45405e+06	641378
P07724	Serum albumin OS=Mus musculus OX=10090 GN=Alb PE=1 SV=3	albumin	ALB	Extracellular Space	transporter	0	0	1744.88	89	64	4177	63	1	608	68.6	6.07	78652	64	2	1.742	2.957	0.739551	0.961248	55.2	52.3	31	127	91.1	75.2	154.7	100.3	213.1	3.37759e+09	3.19971e+09	1.8956e+09	7.76814e+09	5.57979e+09	4.59859e+09	9.46255e+09	6.14291e+09	1.30439e+10
Q61490	CD166 antigen OS=Mus musculus OX=10090 GN=Alcam PE=1 SV=3	activated leukocyte cell adhesion molecule	ALCAM	Plasma Membrane	other	1	0	194.901	32	14	281	14	1	583	65.1	6.15	4296	14	0	1.232	1.307	0.041873	0.02738	83.7	67.1	85	119.9	95.2	103	133.3	103.3	109.4	1.11755e+08	8.96573e+07	1.1356e+08	1.60169e+08	1.27132e+08	1.37627e+08	1.78079e+08	1.38523e+08	1.4605e+08
Q571I9	Aldehyde dehydrogenase family 16 member A1 OS=Mus musculus OX=10090 GN=Aldh16a1 PE=1 SV=2	aldehyde dehydrogenase 16 family member A1	ALDH16A1	Cytoplasm	enzyme	0	0	102.782	22	10	127	10	1	802	84.7	6.32	2112	10	0	1.559	1.095	0.035055	0.654009	81.5	85.6	92.7	101	133.5	136.5	96.6	78.8	93.7	2.22274e+07	2.33637e+07	2.53088e+07	2.77061e+07	3.64546e+07	3.72443e+07	2.65391e+07	2.15075e+07	2.56385e+07
P24549	Retinal dehydrogenase 1 OS=Mus musculus OX=10090 GN=Aldh1a1 PE=1 SV=5	aldehyde dehydrogenase 1 family member A1	ALDH1A1	Cytoplasm	enzyme	0	0	41.701	18	6	37	3	1	501	54.4	7.8	511	6	2	1.188	1.313	0.562307	0.687775	70.7	76	125.8	90.2	144.8	86.3	136.6	70	99.7	8.46628e+06	9.0943e+06	1.50514e+07	1.07929e+07	1.73261e+07	1.03193e+07	1.63381e+07	8.37415e+06	1.19374e+07
O35945	Aldehyde dehydrogenase, cytosolic 1 OS=Mus musculus OX=10090 GN=Aldh1a7 PE=1 SV=1	aldehyde dehydrogenase family 1, subfamily A7	Aldh1a7	Cytoplasm	enzyme	0	0	28.622	18	5	36	2	1	501	54.6	7.71	511	5	0	0.766	1.246	0.95937	0.745374	120.8	6.6	149.5	92.6	59.2	133	153.5	34.2	150.5	908493	50265.7	1.13119e+06	696076	445015	1.02721e+06	1.16361e+06	263368	1.14284e+06
Q9CZS1	Aldehyde dehydrogenase X, mitochondrial OS=Mus musculus OX=10090 GN=Aldh1b1 PE=1 SV=1	aldehyde dehydrogenase 1 family member B1	ALDH1B1	Cytoplasm	enzyme	0	0.005	4.691	4	2	21	1	1	519	57.5	7.02	363	2	0
Q8R0Y6	Cytosolic 10-formyltetrahydrofolate dehydrogenase OS=Mus musculus OX=10090 GN=Aldh1l1 PE=1 SV=1	aldehyde dehydrogenase 1 family member L1	ALDH1L1	Cytoplasm	enzyme	0	0	1222.84	82	59	2017	55	1	902	98.6	5.91	35126	59	4	1.213	0.985	0.004306	0.792058	94.7	97	92.1	116	107.2	114.8	103.7	81.3	93.2	1.27587e+09	1.30666e+09	1.24077e+09	1.56314e+09	1.44472e+09	1.54708e+09	1.39764e+09	1.09613e+09	1.25658e+09
Q8K009	Mitochondrial 10-formyltetrahydrofolate dehydrogenase OS=Mus musculus OX=10090 GN=Aldh1l2 PE=1 SV=2	aldehyde dehydrogenase 1 family member L2	ALDH1L2	Cytoplasm	enzyme	0	0	69.827	10	6	144	2	1	923	101.5	6.29	2898	6	0	1.196	0.783	0.894802	0.776577	139.3	88.8	58.5	132.6	106.2	31.6	227.5	69.5	45.8	2.64438e+06	1.64037e+06	1.19818e+06	2.42397e+06	1.97239e+06	594735	4.1457e+06	1.42223e+06	855836
P47738	Aldehyde dehydrogenase, mitochondrial OS=Mus musculus OX=10090 GN=Aldh2 PE=1 SV=1	aldehyde dehydrogenase 2 family member	ALDH2	Cytoplasm	enzyme	0	0	321.729	56	27	662	25	1	519	56.5	7.62	10938	27	2	1.062	1.031	0.452132	0.590431	91.5	99.1	98.4	104.5	87.9	121.7	101.4	91.6	103.8	3.75727e+08	4.0693e+08	4.03931e+08	4.28856e+08	3.61119e+08	4.99676e+08	4.16248e+08	3.76158e+08	4.26147e+08
P47740	Fatty aldehyde dehydrogenase OS=Mus musculus OX=10090 GN=Aldh3a2 PE=1 SV=2	aldehyde dehydrogenase 3 family member A2	ALDH3A2	Cytoplasm	enzyme	1	0	473.338	56	25	881	25	1	484	53.9	8.35	12435	25	0	1.081	1.04	0.310672	0.297491	97.2	85.2	98.1	105.1	121.9	89.3	101.1	109.3	92.8	6.4826e+08	5.67232e+08	6.53428e+08	7.00112e+08	8.12598e+08	5.95274e+08	6.73352e+08	7.28904e+08	6.1937e+08
Q80VQ0	Aldehyde dehydrogenase family 3 member B1 OS=Mus musculus OX=10090 GN=Aldh3b1 PE=1 SV=1	aldehyde dehydrogenase 3 family member B1	ALDH3B1	Cytoplasm	enzyme	0	0	72.72	30	9	81	5	1	468	52.3	7.55	1294	9	4	1.026	1.315	0.695641	0.091264	88.8	102.2	83.2	91.1	113.7	83	116.8	123.5	97.6	5.19223e+07	5.99087e+07	4.86756e+07	5.3353e+07	6.64874e+07	4.85417e+07	6.83014e+07	7.24271e+07	5.70773e+07
E9Q3E1	Aldehyde dehydrogenase family 3 member B2 OS=Mus musculus OX=10090 GN=Aldh3b2 PE=1 SV=1	aldehyde dehydrogenase 3 family, member B2	Aldh3b2	Cytoplasm	enzyme	0	0	31.901	16	5	28	1	1	479	52.9	6.09	582	5	0	0.762	0.534	0.582219	0.11317	59.4	82.4	151.9	54.5	367.9	62.8	29	48.3	44	1.73386e+06	2.40702e+06	4.43753e+06	1.59083e+06	1.07465e+07	1.83433e+06	1.0007e+06	1.41011e+06	1.28584e+06
Q8CHT0	Delta-1-pyrroline-5-carboxylate dehydrogenase, mitochondrial OS=Mus musculus OX=10090 GN=Aldh4a1 PE=1 SV=3	aldehyde dehydrogenase 4 family member A1	ALDH4A1	Cytoplasm	enzyme	0	0	192.707	30	13	287	13	1	562	61.8	8.24	4177	13	0	1.444	1.189	0.232368	0.241655	85	82.4	90.2	122.7	76.7	126.1	101.1	83.6	132.2	9.2991e+07	9.00744e+07	9.871e+07	1.34384e+08	8.39085e+07	1.37842e+08	1.1046e+08	9.16455e+07	1.44739e+08
Q8BWF0	Succinate-semialdehyde dehydrogenase, mitochondrial OS=Mus musculus OX=10090 GN=Aldh5a1 PE=1 SV=1	aldehyde dehydrogenase 5 family member A1	ALDH5A1	Cytoplasm	enzyme	0	0	172.442	42	12	174	12	1	523	55.9	8.25	2570	12	0	1.108	1.103	0.235072	0.171587	92	95.6	90.4	109.1	90.5	102	123.1	101.5	95.7	5.39646e+07	5.61741e+07	5.30361e+07	6.40389e+07	5.31212e+07	5.98237e+07	7.21868e+07	5.95922e+07	5.6127e+07
Q9EQ20	Methylmalonate-semialdehyde dehydrogenase [acylating], mitochondrial OS=Mus musculus OX=10090 GN=Aldh6a1 PE=1 SV=1	aldehyde dehydrogenase 6 family member A1	ALDH6A1	Cytoplasm	enzyme	1	0	610.506	70	31	970	31	1	535	57.9	8.07	16145	31	0	1.439	1.153	0.168539	0.078991	95.5	85.2	85.2	124.9	85.3	122.6	107.7	95.5	98.2	7.76341e+08	6.92882e+08	6.92673e+08	1.01687e+09	6.93546e+08	9.97032e+08	8.75988e+08	7.76368e+08	7.98221e+08
Q9DBF1	Alpha-aminoadipic semialdehyde dehydrogenase OS=Mus musculus OX=10090 GN=Aldh7a1 PE=1 SV=4	aldehyde dehydrogenase 7 family member A1	ALDH7A1	Cytoplasm	enzyme	0	0	250.959	44	16	281	16	1	539	58.8	7.47	3883	16	0	1.2	1.163	0.191162	0.457627	93.6	74.8	92.9	111.4	87.7	142.7	108	73.2	115.7	1.42678e+08	1.14004e+08	1.41671e+08	1.6993e+08	1.33761e+08	2.1759e+08	1.64713e+08	1.11748e+08	1.76532e+08
Q8BH00	Aldehyde dehydrogenase family 8 member A1 OS=Mus musculus OX=10090 GN=Aldh8a1 PE=1 SV=1	aldehyde dehydrogenase 8 family member A1	ALDH8A1	Cytoplasm	enzyme	0	0	524.772	72	25	632	25	1	487	53.6	7.55	10152	25	0	1.261	1.179	0.20084	0.934021	110.1	73.8	90	113.5	96.1	138	106.1	66	106.3	4.18665e+08	2.80972e+08	3.47004e+08	4.31525e+08	3.65561e+08	5.26701e+08	4.03467e+08	2.51151e+08	4.06067e+08
Q9JLJ2	4-trimethylaminobutyraldehyde dehydrogenase OS=Mus musculus OX=10090 GN=Aldh9a1 PE=1 SV=1	aldehyde dehydrogenase 9 family member A1	ALDH9A1	Cytoplasm	enzyme	0	0	479.478	78	30	657	30	1	494	53.5	6.98	9504	30	0	1.264	1.166	0.128197	0.46444	97.5	91.8	80	116.1	92	124.7	107.1	78.3	112.5	6.54165e+08	6.15799e+08	5.36893e+08	7.78395e+08	6.17235e+08	8.36406e+08	7.18103e+08	5.25226e+08	7.55359e+08
P05064	Fructose-bisphosphate aldolase A OS=Mus musculus OX=10090 GN=Aldoa PE=1 SV=2	aldolase, fructose-bisphosphate A	ALDOA	Cytoplasm	enzyme	0	0	686.844	88	31	1267	28	1	364	39.3	8.09	22458	31	4	1.482	1.203	0.361425	0.604205	124	71.7	67.3	131.6	91.9	106.2	140.2	80.8	86.3	1.09571e+09	6.3361e+08	5.94859e+08	1.16294e+09	8.11851e+08	9.38729e+08	1.23897e+09	7.14371e+08	7.6246e+08
Q91Y97	Fructose-bisphosphate aldolase B OS=Mus musculus OX=10090 GN=Aldob PE=1 SV=3	aldolase, fructose-bisphosphate B	ALDOB	Cytoplasm	enzyme	0	0	828.726	92	35	2205	34	1	364	39.5	8.27	47163	35	1	1.477	1.291	0.281522	0.424162	114.9	79.7	66.7	117.7	88.1	122.6	123.3	84	102.9	4.96226e+09	3.4413e+09	2.87768e+09	5.08274e+09	3.80262e+09	5.29097e+09	5.32391e+09	3.62752e+09	4.44129e+09
P05063	Fructose-bisphosphate aldolase C OS=Mus musculus OX=10090 GN=Aldoc PE=1 SV=4	aldolase, fructose-bisphosphate C	ALDOC	Cytoplasm	enzyme	0	0	104.348	26	7	304	4	1	363	39.4	7.12	1887	7	0	1.039	1.094	0.946408	0.649544	109.7	98.7	99	109	94.3	102.9	110.3	108.3	67.7	3.59808e+06	3.21436e+06	3.25824e+06	4.33968e+06	3.37074e+06	4.96011e+06	3.78913e+06	3.67392e+06	2.44342e+06
Q3TZM9	GDP-Man:Man(3)GlcNAc(2)-PP-Dol alpha-1,2-mannosyltransferase OS=Mus musculus OX=10090 GN=Alg11 PE=2 SV=1	ALG11 alpha-1,2-mannosyltransferase	ALG11	ER	other	2	0.001	8.49	2	1	16	1	1	492	55.2	8.29	317	1	0	1.199	1.199	0.860159	0.765482	94.5	38.1	148.8	113.3	51.4	140	113.3	82.6	117.9	1.61313e+06	656556	2.53671e+06	1.92909e+06	875641	2.38344e+06	1.93185e+06	1.42216e+06	2.00698e+06
Q9DBE8	Alpha-1,3/1,6-mannosyltransferase ALG2 OS=Mus musculus OX=10090 GN=Alg2 PE=1 SV=2	ALG2 alpha-1,3/1,6-mannosyltransferase	ALG2	Cytoplasm	enzyme	0	0	32.011	14	3	25	3	1	415	47.4	7.97	247	3	0	1.332	1.29	0.241605	0.173411	82.9	62.8	108.8	120.1	89.9	110.5	100.5	117.5	107	3.23947e+06	2.54155e+06	4.28501e+06	4.68844e+06	3.58992e+06	4.24589e+06	3.8681e+06	4.51337e+06	4.10589e+06
Q9DB25	Dolichyl-phosphate beta-glucosyltransferase OS=Mus musculus OX=10090 GN=Alg5 PE=1 SV=1	ALG5 dolichyl-phosphate beta-glucosyltransferase	ALG5	Cytoplasm	enzyme	1	0	86.813	25	6	55	6	1	324	36.8	8.6	907	6	0	1.25	0.996	0.156512	0.48536	94.2	86.2	98.1	118.9	117.9	91.7	108	93.9	91.1	2.93367e+07	2.68219e+07	3.05327e+07	3.70175e+07	3.6684e+07	2.85395e+07	3.36335e+07	2.92417e+07	2.83555e+07
Q8VDI9	Alpha-1,2-mannosyltransferase ALG9 OS=Mus musculus OX=10090 GN=Alg9 PE=2 SV=1	ALG9 alpha-1,2-mannosyltransferase	ALG9	Cytoplasm	enzyme	8	0.001	7.041	3	1	25	1	1	611	69.5	8.94	67	1	0	0.972	1.11	0.756052	0.314663	109.7	28.9	140.4	127.6	89.2		121.8	164.1	118.4	288807	76584.3	369474	335545	234550		321582	433077	311332
Q8K1E6	Alpha-ketoglutarate-dependent dioxygenase alkB homolog 3 OS=Mus musculus OX=10090 GN=Alkbh3 PE=1 SV=1	alkB homolog 3, alpha-ketoglutaratedependent dioxygenase	ALKBH3	Nucleus	enzyme	0	0.012	3.684	6	1	3	1	1	286	33	8.06	0	1	0	1.305	1.397	0.756521	0.466818	74	42	147.1	91.3	96.6	106.5	103.4	103.2	135.9	386769	216425	751577	467475	511077	549650	529103	541509	694185
P39655	Arachidonate 12-lipoxygenase, 12S-type OS=Mus musculus OX=10090 GN=Alox12 PE=1 SV=4	arachidonate 12-lipoxygenase, 12S type	ALOX12	Cytoplasm	enzyme	0	0	78.292	15	6	24	6	1	663	75.3	6.19	286	6	0	97.295	44.709	0.178194	0.345101	1.1	1.8		139.7	321	62.8	64.2	16.5	292.8	77876.9	123436		9.50056e+06	2.1843e+07	4.40924e+06	4.64875e+06	1.23914e+06	1.99136e+07
P09242	Alkaline phosphatase, tissue-nonspecific isozyme OS=Mus musculus OX=10090 GN=Alpl PE=1 SV=2	alkaline phosphatase, biomineralization associated	ALPL	Plasma Membrane	phosphatase	0	0	822.62	60	28	1676	28	1	524	57.5	7.01	34586	28	0	0.883	1.097	0.353043	0.814836	142.6	98	87.1	110.3	61.3	86.5	114.1	92.6	107.4	3.22454e+09	2.21745e+09	1.97032e+09	2.49565e+09	1.3873e+09	1.95689e+09	2.58121e+09	2.09358e+09	2.42977e+09
Q920R0	Alsin OS=Mus musculus OX=10090 GN=Als2 PE=1 SV=3	alsin Rho guanine nucleotide exchange factor ALS2	ALS2	Cytoplasm	other	0	0	24.372	3	3	14	3	1	1651	182.5	6.3	120	3	0	1.068	1.235	0.351119	0.080467	103	86.9	75.8	118.5	91.7	92.8	120.3	103.6	107.3	6.01148e+06	5.11385e+06	4.45317e+06	6.91772e+06	5.35696e+06	5.41437e+06	7.02523e+06	6.15431e+06	6.26432e+06
O08583	THO complex subunit 4 OS=Mus musculus OX=10090 GN=Alyref PE=1 SV=3	Aly/REF export factor	Alyref	Nucleus	other	0	0	9.961	4	1	18	1	1	255	26.9	11.15	422	1	0	1.221	1.175	0.237883	0.183733	75.1	91	87.6	140.9	106.9	80.9	128.6	86.1	102.9	4.51727e+06	5.48749e+06	5.28e+06	8.47637e+06	6.56779e+06	4.88331e+06	7.83074e+06	5.18447e+06	6.19118e+06
O09174	Alpha-methylacyl-CoA racemase OS=Mus musculus OX=10090 GN=Amacr PE=1 SV=4	alpha-methylacyl-CoA racemase	AMACR	Cytoplasm	enzyme	0	0	136.33	50	12	159	12	1	381	41.7	7.4	1908	12	0	1.085	1.594	0.256128	0.0302	80.4	69.6	84.7	129.7	87.3	81	140.9	98.2	128.2	6.96078e+07	6.01871e+07	7.31658e+07	1.17112e+08	7.59562e+07	7.02147e+07	1.23038e+08	8.48634e+07	1.11932e+08
Q07456	Protein AMBP OS=Mus musculus OX=10090 GN=Ambp PE=1 SV=2	alpha-1-microglobulin/bikunin precursor	AMBP	Extracellular Space	transporter	0	0	67.998	17	6	75	6	1	349	39	6.32	1391	6	0	1.534	1.606	0.116981	0.014866	71.6	74.3	59.9	109.8	153.7	77.3	138.5	100.1	115	2.80971e+07	2.91272e+07	2.34912e+07	4.30164e+07	6.03382e+07	3.04682e+07	5.42845e+07	3.9407e+07	4.50555e+07
Q8JZV7	N-acetylglucosamine-6-phosphate deacetylase OS=Mus musculus OX=10090 GN=Amdhd2 PE=1 SV=1	amidohydrolase domain containing 2	AMDHD2	Nucleus	enzyme	0	0	75.185	34	7	49	7	1	409	43.5	6.23	703	7	0	1.318	1.348	0.121318	0.098038	82.2	98.1	59.5	108.4	138.1	94.1	110.8	96.1	112.6	1.87073e+07	2.22955e+07	1.3531e+07	2.46173e+07	3.14221e+07	2.13916e+07	2.51601e+07	2.18178e+07	2.55808e+07
Q9R049	E3 ubiquitin-protein ligase AMFR OS=Mus musculus OX=10090 GN=Amfr PE=1 SV=2	autocrine motility factor receptor	AMFR	Plasma Membrane	transmembrane receptor	5	0	43.259	9	4	40	4	1	643	73.1	6.46	1132	4	0	0.888	0.892	0.932962	0.558375	95.2	113.1	106.2	94.4	130.2	86	94.8	124.6	55.6	4.4491e+06	5.29455e+06	4.96767e+06	4.41148e+06	6.09539e+06	4.01829e+06	4.43218e+06	5.85029e+06	2.70525e+06
Q99JB7	Protein amnionless OS=Mus musculus OX=10090 GN=Amn PE=1 SV=1	amnion associated transmembrane protein	AMN	Plasma Membrane	other	1	0	430.54	58	19	541	19	1	458	48.7	5.55	8269	19	0	0.735	0.859	0.089452	0.589705	118	124.2	95.8	99.8	70.6	86.8	130.9	101.4	72.4	3.79347e+08	3.98746e+08	3.08404e+08	3.2049e+08	2.26814e+08	2.79224e+08	4.21933e+08	3.25658e+08	2.32499e+08
Q8BTZ4	Anaphase-promoting complex subunit 5 OS=Mus musculus OX=10090 GN=Anapc5 PE=1 SV=1	anaphase promoting complex subunit 5	ANAPC5	Nucleus	other	0	0.001	9.032	1	1	1	1	1	740	83	6.71	33	1	0	1.014	0.974	0.677371	0.5303	92	119.9	98.8	95.5	100.1	103.4	96.1	106.3	87.8	2.02722e+06	2.63234e+06	2.18612e+06	2.10201e+06	2.23975e+06	2.27089e+06	2.11752e+06	2.34759e+06	2.02099e+06
Q9Z1P8	Angiopoietin-related protein 4 OS=Mus musculus OX=10090 GN=Angptl4 PE=2 SV=1	angiopoietin like 4	ANGPTL4	Extracellular Space	other	0	0.001	7.067	5	1	6	1	1	410	45.5	8.13	18	1	0	1.837	2.265	0.51172	0.202011	138.2	13.4	55.2	146.4	56.1	101.4	158.9	105.3	125	310104	41425.5	135432	330018	126246	230975	359517	249245	285056
Q02357	Ankyrin-1 OS=Mus musculus OX=10090 GN=Ank1 PE=1 SV=2	ankyrin 1	ANK1	Plasma Membrane	other	0	0	741.757	42	55	372	48	1	1862	204.1	6.55	3772	55	8	16.71	12.735	0.19773	0.014559	8.2	8.6	8.3	138.4	447	24.2	105.5	49.7	110.1	1.59188e+07	1.63856e+07	1.58678e+07	2.65315e+08	8.57791e+08	4.64137e+07	2.02214e+08	9.52716e+07	2.11012e+08
Q8C8R3	Ankyrin-2 OS=Mus musculus OX=10090 GN=Ank2 PE=1 SV=2	ankyrin 2, brain	Ank2	Plasma Membrane	other	0	0	98.667	3	11	104	2	1	3898	426	5.17	1096	11	0	1.488	1.441	0.351799	0.538848	135.1	45.4	70.4	104.6	104.7	130.2	84	124.2	101.4	1.96307e+06	651783	1.0188e+06	1.52796e+06	1.51372e+06	1.90003e+06	1.21243e+06	1.7811e+06	1.45567e+06
G5E8K5	Ankyrin-3 OS=Mus musculus OX=10090 GN=Ank3 PE=1 SV=1	ankyrin 3	ANK3	Plasma Membrane	other	0	0	334.489	18	27	296	18	1	1961	213.9	6.7	3051	27	3	1.427	1.246	0.009805	0.068289	83.3	71	82.2	117.3	123.6	101.6	127.3	91.2	102.5	6.72995e+07	5.73289e+07	6.64043e+07	9.47575e+07	9.99835e+07	8.19963e+07	1.02744e+08	7.36859e+07	8.27121e+07
Q810B6	Rabankyrin-5 OS=Mus musculus OX=10090 GN=Ankfy1 PE=1 SV=2	ankyrin repeat and FYVE domain containing 1	ANKFY1	Cytoplasm	transcription regulator	0	0	158.477	23	19	121	19	1	1169	128.6	5.91	1101	19	0	1.172	1.169	0.024805	0.145163	78.2	89.5	88.3	101.9	103.5	118.9	103.2	89.1	127.5	4.8008e+07	5.48618e+07	5.42032e+07	6.24894e+07	6.34709e+07	7.3007e+07	6.33328e+07	5.50085e+07	7.82475e+07
Q9JHZ2	Progressive ankylosis protein OS=Mus musculus OX=10090 GN=Ankh PE=2 SV=1	ANKH inorganic pyrophosphate transport regulator	ANKH	Plasma Membrane	transporter	8	0	20.222	7	2	11	2	1	492	54.3	7.88	79	2	0	1.257	1.098	0.423691	0.354932	100	90.8	84.6	114.2	115.6	79.4	128	99.7	87.7	887792	807547	751171	1.01395e+06	1.02684e+06	704710	1.13821e+06	888533	779341
Q6ZPS6	Ankyrin repeat and IBR domain-containing protein 1 OS=Mus musculus OX=10090 GN=Ankib1 PE=1 SV=2	ankyrin repeat and IBR domain containing 1	ANKIB1	Nucleus	transcription regulator	0	0	91.042	12	7	96	7	1	1085	121.8	5.16	908	7	0	0.822	0.846	0.080637	0.257955	113	128.2	107.3	92.9	105.5	75.6	95.6	120	62	1.80903e+07	2.05281e+07	1.71938e+07	1.4915e+07	1.68768e+07	1.21194e+07	1.53097e+07	1.92626e+07	9.94228e+06
Q3TPE9	Ankyrin repeat and MYND domain-containing protein 2 OS=Mus musculus OX=10090 GN=Ankmy2 PE=1 SV=1	ankyrin repeat and MYND domain containing 2	ANKMY2	Plasma Membrane	other	0	0.008	4.157	3	1	3	1	1	440	48.7	6.67	17	1	0	0.921	0.935	0.67042	0.813723	137	71.1	105.9	97.5	85.5	103.8	94.3	106.1	99	2.26858e+06	1.18021e+06	1.76774e+06	1.62359e+06	1.41744e+06	1.72079e+06	1.57636e+06	1.81867e+06	1.64122e+06
Q505D1	Serine/threonine-protein phosphatase 6 regulatory ankyrin repeat subunit A OS=Mus musculus OX=10090 GN=Ankrd28 PE=1 SV=1	ankyrin repeat domain 28	ANKRD28	Cytoplasm	other	0	0.016	3.253	1	1	1	1	1	1053	112.8	6.27	26	1	0	1.069	1.061	0.373369	0.418919	68.1	97.8	86.9	78.3	192	92.9	108.8	92.2	82.9	491666	703524	625603	572483	1.38132e+06	668629	782652	668897	596935
Q3U0L2	Ankyrin repeat domain-containing protein 33B OS=Mus musculus OX=10090 GN=Ankrd33b PE=1 SV=1	ankyrin repeat domain 33B	ANKRD33B	Other	other	0	0	10.859	2	1	14	1	1	486	53.2	8.68	168	1	0	0.8	1.353	0.307817	0.131196	90	69.2	93.9	72	52.2	85.6	121.8	208	107.2	657884	507416	687242	526228	384429	630162	890915	1.52961e+06	784141
Q8BTZ5	Ankyrin repeat domain-containing protein 46 OS=Mus musculus OX=10090 GN=Ankrd46 PE=1 SV=1	ankyrin repeat domain 46	ANKRD46	Nucleus	transcription regulator	1	0.001	7.128	5	1	3	1	1	228	25.2	5.73	61	1	0	1.004	1.022	0.924432	0.794714	101.4	89.1	112.6	101.7	97.5	101.8	104	103.6	88.4	2.06114e+06	1.80916e+06	2.29385e+06	2.06503e+06	1.97944e+06	2.06969e+06	2.10993e+06	2.10298e+06	1.7932e+06
Q8K3X6	Ankyrin repeat and SAM domain-containing protein 4B OS=Mus musculus OX=10090 GN=Anks4b PE=1 SV=1	ankyrin repeat and sterile alpha motif domain containing 4B	ANKS4B	Nucleus	transcription regulator	0	0	205.461	42	13	299	13	1	423	47.9	4.96	4170	13	0	0.816	0.983	0.685063	0.866962	62.5	134.8	118.2	76.8	96.5	110.8	64.6	119.5	116.3	1.12731e+08	2.43531e+08	2.13197e+08	1.38538e+08	1.74067e+08	1.99934e+08	1.16641e+08	2.16324e+08	2.09721e+08
Q8BHY3	Anoctamin-1 OS=Mus musculus OX=10090 GN=Ano1 PE=1 SV=2	anoctamin 1	ANO1	Plasma Membrane	ion channel	7	0.001	6.095	1	1	5	1	1	960	110.8	7.83	19	1	0	1.253	1.165	0.870237	0.901152	66.9	74.8	149.3	86.5	125.9	93.7	131	84.9	87.1	2.24487e+06	2.5068e+06	4.99726e+06	2.89601e+06	4.21417e+06	3.15069e+06	4.38843e+06	2.84392e+06	2.92e+06
Q8BH79	Anoctamin-10 OS=Mus musculus OX=10090 GN=Ano10 PE=1 SV=1	anoctamin 10	ANO10	Plasma Membrane	ion channel	8	0	13.125	6	3	9	3	1	659	76.1	6.7	95	3	0	1.19	0.9	0.442392	0.705989	81.9	101.3	85.4	101.6	154.9	74.4	76.8	151	72.6	5.06457e+06	6.25248e+06	5.2923e+06	6.27279e+06	9.60778e+06	4.75324e+06	4.74832e+06	9.32103e+06	4.58615e+06
Q8CFW1	Anoctamin-2 OS=Mus musculus OX=10090 GN=Ano2 PE=1 SV=2	anoctamin 2	ANO2	Plasma Membrane	ion channel	8	0.042	2.314	2	1	2	1	1	1002	114.1	7.36	0	1	0
A2AHL1	Anoctamin-3 OS=Mus musculus OX=10090 GN=Ano3 PE=1 SV=1	anoctamin 3	ANO3	Plasma Membrane	transporter	8	0.068	1.931	2	1	2	1	1	981	114.5	8.87	0	1	0	0.359	0.61	0.51886	0.228275		135.5	325.9			75.3	137.2	97.9	128.2		2.13645e+06	5.14021e+06			1.18819e+06	2.16389e+06	1.95309e+06	2.02189e+06
Q6P9J9	Anoctamin-6 OS=Mus musculus OX=10090 GN=Ano6 PE=1 SV=1	anoctamin 6	ANO6	Plasma Membrane	ion channel	8	0	329.214	24	21	544	21	1	911	106.2	6.76	8740	21	0	0.915	0.958	0.025863	0.431379	109.7	104.2	101.4	95.5	87.8	95.4	99.8	107	99.4	4.38105e+08	4.15939e+08	4.05029e+08	3.80974e+08	3.50378e+08	3.81042e+08	3.98371e+08	4.27154e+08	3.96666e+08
O35381	Acidic leucine-rich nuclear phosphoprotein 32 family member A OS=Mus musculus OX=10090 GN=Anp32a PE=1 SV=1	acidic (leucine-rich) nuclear phosphoprotein 32 family, member A	Anp32a	Nucleus	other	0	0	66.844	22	6	91	4	1	247	28.5	4.07	1512	6	2	1.025	0.892	0.501669	0.353231	102.7	107.6	89.4	121.1	105.3	94.3	99.6	91.7	88.3	6.48578e+07	6.79455e+07	5.64153e+07	7.64263e+07	6.65263e+07	5.95348e+07	6.28598e+07	5.79095e+07	5.57881e+07
Q9EST5	Acidic leucine-rich nuclear phosphoprotein 32 family member B OS=Mus musculus OX=10090 GN=Anp32b PE=1 SV=1	acidic (leucine-rich) nuclear phosphoprotein 32 family, member B	Anp32b	Nucleus	other	0	0	22.444	17	5	36	3	1	272	31.1	4.01	925	5	0	1.004	0.708	0.926459	0.550399	106.6	144.3	70.5	107	135.7	70.3	75.5	126.1	63.9	1.71841e+07	2.32909e+07	1.13804e+07	1.72525e+07	2.19167e+07	1.14242e+07	1.21621e+07	2.03518e+07	1.03639e+07
P97449	Aminopeptidase N OS=Mus musculus OX=10090 GN=Anpep PE=1 SV=4	alanyl aminopeptidase, membrane	ANPEP	Plasma Membrane	peptidase	1	0	2838.48	62	81	12153	81	1	966	109.6	5.9	252071	81	0	0.787	0.787	0.030096	0.075679	131.1	117	108	92.1	68.5	92.6	92.1	109.2	89.6	2.49045e+10	2.22226e+10	2.05197e+10	1.74958e+10	1.30098e+10	1.75845e+10	1.74949e+10	2.074e+10	1.70183e+10
P10107	Annexin A1 OS=Mus musculus OX=10090 GN=Anxa1 PE=1 SV=2	annexin A1	ANXA1	Plasma Membrane	enzyme	0	0	878.555	86	42	1867	42	1	346	38.7	7.37	45167	42	0	1.57	1.889	0.032728	0.027341	62.5	65.6	66	103	136.4	89.4	123.9	95.6	157.6	1.2104e+09	1.27036e+09	1.28039e+09	1.99449e+09	2.64068e+09	1.73109e+09	2.40039e+09	1.85312e+09	3.05243e+09
P97384	Annexin A11 OS=Mus musculus OX=10090 GN=Anxa11 PE=1 SV=2	annexin A11	ANXA11	Nucleus	other	0	0	694.725	49	38	2695	37	1	503	54	7.66	52551	38	0	1.168	1.074	0.185946	0.234639	98.3	96.1	72	112.2	122.6	91.3	110.8	93.5	103.2	3.35375e+09	3.27914e+09	2.45702e+09	3.82981e+09	4.18407e+09	3.11508e+09	3.78268e+09	3.19406e+09	3.52186e+09
Q99JG3	Annexin A13 OS=Mus musculus OX=10090 GN=Anxa13 PE=1 SV=3	annexin A13	ANXA13	Plasma Membrane	other	0	0	501.795	79	28	797	28	1	317	35.9	5.99	15316	28	0	0.992	0.897	0.477069	0.952709	103	107.1	84.8	114.6	102.1	98.1	92.3	140.1	57.8	6.28063e+08	6.534e+08	5.18115e+08	6.99348e+08	6.22937e+08	5.98531e+08	5.63299e+08	8.55337e+08	3.53069e+08
P07356	Annexin A2 OS=Mus musculus OX=10090 GN=Anxa2 PE=1 SV=2	annexin A2	ANXA2	Plasma Membrane	other	0	0	1272.33	87	57	4654	57	1	339	38.7	7.69	98725	57	0	1.237	1.36	0.076299	0.029519	84.4	88.8	81.3	117.4	104.4	90.4	121.9	96.4	114.8	7.09339e+09	7.46136e+09	6.8347e+09	9.85961e+09	8.7758e+09	7.59836e+09	1.02431e+10	8.11041e+09	9.64403e+09
O35639	Annexin A3 OS=Mus musculus OX=10090 GN=Anxa3 PE=1 SV=4	annexin A3	ANXA3	Cytoplasm	enzyme	0	0	748.064	84	36	1638	35	1	323	36.4	5.76	31768	36	0	1.126	1.277	0.076618	0.06481	73.2	85.6	85.7	95.9	123.5	96.4	109.4	94.9	135.4	9.96131e+08	1.16736e+09	1.16743e+09	1.30636e+09	1.68102e+09	1.31276e+09	1.48892e+09	1.29333e+09	1.84411e+09
P97429	Annexin A4 OS=Mus musculus OX=10090 GN=Anxa4 PE=1 SV=4	annexin A4	ANXA4	Plasma Membrane	other	0	0	966.826	87	42	3198	41	1	319	35.9	5.57	77566	42	0	1.18	1.231	0.078518	0.043608	88.4	93.6	79.7	104.3	118.6	95	115	96.7	108.8	4.48428e+09	4.74733e+09	4.04635e+09	5.28927e+09	6.01463e+09	4.81884e+09	5.83528e+09	4.90621e+09	5.52221e+09
P48036	Annexin A5 OS=Mus musculus OX=10090 GN=Anxa5 PE=1 SV=1	annexin A5	ANXA5	Plasma Membrane	transporter	0	0	1160.05	98	52	8190	52	1	319	35.7	4.96	146843	52	0	1.244	1.274	0.022566	0.014069	88.3	85.7	84.9	106.6	118	98	112.2	97	109.2	1.1747e+10	1.13919e+10	1.12968e+10	1.41778e+10	1.56971e+10	1.30356e+10	1.49141e+10	1.29158e+10	1.45162e+10
P14824	Annexin A6 OS=Mus musculus OX=10090 GN=Anxa6 PE=1 SV=3	annexin A6	ANXA6	Plasma Membrane	ion channel	0	0	1688.1	88	81	5878	80	1	673	75.8	5.5	96275	81	0	1.21	1.332	0.094116	0.155202	97.6	86.2	84.9	110.3	104.3	94.4	118.6	88.8	114.8	6.55109e+09	5.78954e+09	5.69963e+09	7.40588e+09	7.00422e+09	6.3372e+09	7.9638e+09	5.96409e+09	7.71028e+09
Q07076	Annexin A7 OS=Mus musculus OX=10090 GN=Anxa7 PE=1 SV=2	annexin A7	ANXA7	Plasma Membrane	ion channel	0	0	477.243	53	34	2102	34	1	463	49.9	6.18	34406	34	0	1.109	1.085	0.155144	0.075594	94.8	93.4	78.2	103.5	120.9	93	114.3	101.3	100.5	3.59803e+09	3.54639e+09	2.96678e+09	3.92491e+09	4.58788e+09	3.53291e+09	4.33517e+09	3.84914e+09	3.81544e+09
O35640	Annexin A8 OS=Mus musculus OX=10090 GN=Anxa8 PE=1 SV=2	annexin A8 like 1	ANXA8/ANXA8L1	Plasma Membrane	other	0	0	13.064	12	4	47	4	1	327	36.7	5.94	246	4	0	1.138	1.459	0.518264	0.037254	47.1	84.4	94.2	54.6	130.8	96.1	123.1	116.9	152.9	5.5896e+06	9.59061e+06	1.06748e+07	6.83001e+06	1.49262e+07	1.08735e+07	1.39438e+07	1.32353e+07	1.73355e+07
Q9JHQ0	Annexin A9 OS=Mus musculus OX=10090 GN=Anxa9 PE=2 SV=2	annexin A9	ANXA9	Plasma Membrane	transmembrane receptor	0	0.01	3.921	3	1	5	1	1	345	38.1	5.49	103	1	0	1.035	1.052	0.885856	0.703425	118.9	81.2	96.3	137.6	45.9	99.7	137.2	81.9	101.3	1.94831e+06	1.34019e+06	1.57681e+06	2.27217e+06	755072	1.63815e+06	2.27615e+06	1.34069e+06	1.66468e+06
O70423	Membrane primary amine oxidase OS=Mus musculus OX=10090 GN=Aoc3 PE=1 SV=3	amine oxidase copper containing 3	AOC3	Plasma Membrane	enzyme	1	0	426.543	42	22	488	22	1	765	84.5	6.42	6511	22	0	1.357	1.755	0.010413	0.014118	76	68.4	74.4	121.6	100.9	99.3	130.5	97.8	131.3	2.24663e+08	2.0204e+08	2.20444e+08	3.59504e+08	2.98584e+08	2.94318e+08	3.85614e+08	2.90689e+08	3.88173e+08
O35643	AP-1 complex subunit beta-1 OS=Mus musculus OX=10090 GN=Ap1b1 PE=1 SV=2	adaptor related protein complex 1 subunit beta 1	AP1B1	Cytoplasm	other	0	0	284.889	34	25	405	11	1	943	103.9	5.17	5267	25	0	0.898	0.853	0.290019	0.012152	103	114.7	110.8	77.7	99.5	112.3	92.2	95.3	94.5	9.46373e+07	1.05603e+08	1.02233e+08	7.14178e+07	9.14065e+07	1.0338e+08	8.48203e+07	8.77805e+07	8.69015e+07
P22892	AP-1 complex subunit gamma-1 OS=Mus musculus OX=10090 GN=Ap1g1 PE=1 SV=3	adaptor related protein complex 1 subunit gamma 1	AP1G1	Cytoplasm	other	0	0	97.483	16	8	77	8	1	822	91.3	6.8	395	8	0	0.893	0.887	0.837616	0.343834	105	83.2	132	93.8	93.6	121.7	93.1	78.5	99.1	3.49642e+07	2.77478e+07	4.40381e+07	3.12327e+07	3.11767e+07	4.05336e+07	3.10488e+07	2.61546e+07	3.30297e+07
P35585	AP-1 complex subunit mu-1 OS=Mus musculus OX=10090 GN=Ap1m1 PE=1 SV=3	adaptor related protein complex 1 subunit mu 1	AP1M1	Cytoplasm	transporter	0	0	88.467	27	8	86	6	1	423	48.5	7.3	882	8	2	0.896	0.824	0.311931	0.472815	88.4	147.3	102.9	91.3	93.5	92.3	84.9	123.3	76	8.90814e+07	1.48802e+08	1.05005e+08	9.21838e+07	9.44374e+07	9.3637e+07	8.67485e+07	1.24803e+08	7.75236e+07
Q9WVP1	AP-1 complex subunit mu-2 OS=Mus musculus OX=10090 GN=Ap1m2 PE=1 SV=3	adaptor related protein complex 1 subunit mu 2	AP1M2	Cytoplasm	transporter	0	0	18.263	11	4	27	2	1	423	48.1	7.55	128	4	0	4.48	3.86	0.404207	0.123065	19.8	31.5	125.9	19.3	183	141.2	142.3	121.7	115.3	946089	3.30129e+06	6.02179e+06	955032	8.80238e+06	6.73453e+06	6.7997e+06	5.86466e+06	5.51021e+06
P61967	AP-1 complex subunit sigma-1A OS=Mus musculus OX=10090 GN=Ap1s1 PE=1 SV=1	adaptor related protein complex 1 subunit sigma 1	AP1S1	Cytoplasm	transporter	0	0	56.105	20	3	88	3	1	158	18.7	5.73	2153	3	0	0.801	0.768	0.270634	0.039508	101.8	112.8	133.5	90.3	78.1	120.1	86.6	90.3	86.5	2.41581e+07	2.68269e+07	3.18499e+07	2.16541e+07	1.8538e+07	2.86671e+07	2.06666e+07	2.14409e+07	2.07502e+07
Q7TN05	AP-1 complex subunit sigma-3 OS=Mus musculus OX=10090 GN=Ap1s3 PE=1 SV=1	adaptor related protein complex 1 subunit sigma 3	AP1S3	Cytoplasm	transporter	0	0.018	3.068	6	1	1	1	1	154	18.4	6.34	35	1	0	0.972	0.874	0.888736	0.440908	99.5	95.7	117.6	96.7	96.7	115.3	115.1	76.4	87	2.63836e+06	2.54322e+06	3.12036e+06	2.56587e+06	2.56645e+06	3.05888e+06	3.07129e+06	2.07278e+06	2.3572e+06
P17426	AP-2 complex subunit alpha-1 OS=Mus musculus OX=10090 GN=Ap2a1 PE=1 SV=1	adaptor related protein complex 2 subunit alpha 1	AP2A1	Cytoplasm	transporter	0	0	209.976	24	17	323	10	1	977	107.6	7.03	6346	17	0	1.502	1.354	0.031082	0.239029	64.5	74.8	75.8	112.3	130.8	90.7	101.3	70.1	179.6	4.48329e+07	5.1817e+07	5.26857e+07	7.76829e+07	9.04633e+07	6.29047e+07	7.00376e+07	4.85037e+07	1.24191e+08
P17427	AP-2 complex subunit alpha-2 OS=Mus musculus OX=10090 GN=Ap2a2 PE=1 SV=2	adaptor related protein complex 2 subunit alpha 2	AP2A2	Cytoplasm	transporter	0	0	509.458	52	37	641	30	1	938	104	6.93	9803	37	7	0.945	0.947	0.92278	0.133298	101.9	96.3	109	96.4	92.6	121.2	96.5	89.5	96.6	2.90883e+08	2.74707e+08	3.10754e+08	2.74796e+08	2.64277e+08	3.45628e+08	2.75293e+08	2.55222e+08	2.75449e+08
Q9DBG3	AP-2 complex subunit beta OS=Mus musculus OX=10090 GN=Ap2b1 PE=1 SV=1	adaptor-related protein complex 2, beta 1 subunit	Ap2b1	Plasma Membrane	other	0	0	326.251	39	28	456	14	1	937	104.5	5.38	4172	28	15	1.073	1.108	0.526485	0.857715	83.4	88.5	114.5	94.9	92.1	133.8	98	88.2	106.5	1.51162e+08	1.60529e+08	2.07123e+08	1.72306e+08	1.66585e+08	2.41943e+08	1.78045e+08	1.59747e+08	1.9296e+08
P84091	AP-2 complex subunit mu OS=Mus musculus OX=10090 GN=Ap2m1 PE=1 SV=1	adaptor related protein complex 2 subunit mu 1	AP2M1	Cytoplasm	other	0	0	381.477	56	25	637	25	1	435	49.6	9.54	7071	25	0	1.095	1.069	0.664819	0.987256	91.4	81.4	120.3	100	92.8	120.3	97.7	85.5	110.6	2.66964e+08	2.37931e+08	3.52167e+08	2.92511e+08	2.7207e+08	3.51575e+08	2.85864e+08	2.51027e+08	3.23407e+08
P62743	AP-2 complex subunit sigma OS=Mus musculus OX=10090 GN=Ap2s1 PE=1 SV=1	adaptor related protein complex 2 subunit sigma 1	AP2S1	Cytoplasm	transporter	0	0.001	7.57	11	2	54	2	1	142	17	6.18	743	2	0	1.065	0.894	0.735346	0.357905	85.5	111.6	107	84.3	120.8	114	95.7	95.9	85.1	5.79986e+07	7.56601e+07	7.26036e+07	5.74303e+07	8.19169e+07	7.73556e+07	6.48738e+07	6.50407e+07	5.77479e+07
Q9Z1T1	AP-3 complex subunit beta-1 OS=Mus musculus OX=10090 GN=Ap3b1 PE=1 SV=2	adaptor related protein complex 3 subunit beta 1	AP3B1	Plasma Membrane	transporter	0	0	239.723	27	27	283	27	1	1105	122.7	5.66	3858	27	0	0.942	1.025	0.571656	0.613604	92	94.3	131.2	88.8	82	116.3	96.7	92.5	106.4	1.08526e+08	1.11285e+08	1.54911e+08	1.0478e+08	9.67925e+07	1.37273e+08	1.14065e+08	1.09322e+08	1.2554e+08
O54774	AP-3 complex subunit delta-1 OS=Mus musculus OX=10090 GN=Ap3d1 PE=1 SV=1	adaptor related protein complex 3 subunit delta 1	AP3D1	Cytoplasm	other	0	0	149.672	14	13	273	13	1	1199	135	7.37	2619	13	0	0.917	0.957	0.616559	0.248943	98.3	119.9	101.4	89.4	118.7	92.9	97	103.4	79	1.07397e+08	1.32592e+08	1.10285e+08	9.76131e+07	1.29948e+08	1.01085e+08	1.06738e+08	1.1261e+08	8.59686e+07
Q9JKC8	AP-3 complex subunit mu-1 OS=Mus musculus OX=10090 GN=Ap3m1 PE=1 SV=1	adaptor related protein complex 3 subunit mu 1	AP3M1	Cytoplasm	transporter	0	0	99.497	27	9	111	9	1	418	46.9	6.93	1500	9	0	0.91	0.862	0.211978	0.021354	103.2	111.7	113.5	81.3	101.7	107.4	96.2	97	88	6.27227e+07	6.78882e+07	6.90114e+07	4.97114e+07	6.18001e+07	6.53664e+07	5.85456e+07	5.89977e+07	5.35836e+07
Q9DCR2	AP-3 complex subunit sigma-1 OS=Mus musculus OX=10090 GN=Ap3s1 PE=1 SV=2	adaptor related protein complex 3 subunit sigma 1	AP3S1	Cytoplasm	transporter	0	0	20.279	6	1	42	1	1	193	21.7	5.39	308	1	0	0.803	0.951	0.719091	0.610749	100.9	81.5	137.8	81	68.3	139.2	87.8	96	107.5	4.98732e+06	4.02813e+06	6.81543e+06	4.01241e+06	3.38399e+06	6.87968e+06	4.34584e+06	4.74679e+06	5.31354e+06
Q8BSZ2	AP-3 complex subunit sigma-2 OS=Mus musculus OX=10090 GN=Ap3s2 PE=1 SV=1	adaptor related protein complex 3 subunit sigma 2	AP3S2	Cytoplasm	transporter	0	0	22.273	8	1	5	1	1	193	22	5.22	34	1	0	0.802	1.401	0.582638	0.469725	109	76.5	100.2	66.4	80.3	110.1	140.4	62.9	154.3	913453	644305	858054	556593	661610	896722	1.04365e+06	600552	1.14824e+06
Q80V94	AP-4 complex subunit epsilon-1 OS=Mus musculus OX=10090 GN=Ap4e1 PE=1 SV=3	adaptor related protein complex 4 subunit epsilon 1	AP4E1	Cytoplasm	other	0	0.07	1.916	2	1	1	1	1	1122	124.8	5.72	0	1	0	0.994	0.932	0.594728	0.780187	64.7	91.9	134	91.4	164.1	90	85.7	127.1	51.1	200384	284919	424588	283153	507751	279153	270467	393535	158839
Q9JKC7	AP-4 complex subunit mu-1 OS=Mus musculus OX=10090 GN=Ap4m1 PE=1 SV=1	adaptor related protein complex 4 subunit mu 1	AP4M1	Cytoplasm	other	0	0.012	3.624	3	1	16	1	1	449	49.5	6.64	28	1	0	0.632	0.74	0.346629	0.34473	116.1	74.7	178.3	73.5	69.4	117.9	81.1	103	86	800308	514666	1.23441e+06	507064	480050	817073	558956	717369	591733
Q9WVL1	AP-4 complex subunit sigma-1 OS=Mus musculus OX=10090 GN=Ap4s1 PE=2 SV=1	adaptor related protein complex 4 subunit sigma 1	AP4S1	Cytoplasm	other	0	0.087	1.757	10	1	4	1	1	144	16.8	5.34	36	1	0	1.052	0.85	0.445336	0.694951	55.8	100.5	114.8	71.8	203.3	105.7	87.6	85.4	75.1	263969	475060	543775	341447	969794	502855	416191	407330	354960
Q3TAP4	AP-5 complex subunit beta-1 OS=Mus musculus OX=10090 GN=Ap5b1 PE=1 SV=1	adaptor related protein complex 5 subunit beta 1	AP5B1	Cytoplasm	other	0	0	40.232	5	3	26	3	1	876	94.6	6.07	289	3	0	0.933	0.911	0.812355	0.552824	92.4	51	197.8	74.4	86.2	143.6	69.2	84.2	101.1	1.3328e+06	733909	2.84816e+06	1.0754e+06	1.23984e+06	2.09394e+06	994847	1.22037e+06	1.45831e+06
Q9D742	AP-5 complex subunit sigma-1 OS=Mus musculus OX=10090 GN=Ap5s1 PE=1 SV=1	adaptor related protein complex 5 subunit sigma 1	AP5S1	Cytoplasm	other	0	0	13.123	11	2	10	2	1	170	18.8	7.24	35	2	0	1.351	1.047	0.946379	0.586752	88.1	63.6	164.8	46.5	119.1	160.6	59.4	105.6	92.3	471220	339809	888951	248703	637173	858926	318221	564770	493579
Q3U829	AP-5 complex subunit zeta-1 OS=Mus musculus OX=10090 GN=Ap5z1 PE=2 SV=1	adaptor related protein complex 5 subunit zeta 1	AP5Z1	Nucleus	other	0	0.001	8.814	6	2	9	2	1	807	89.4	6.95	15	2	0	0.787	0.615	0.610678	0.217287	67.8	130.4	163.5	56	141.3	102.6	81.4	76.9	80.1	295642	499143	619353	275093	515537	374036	348314	348133	319992
O88888	Amyloid-beta A4 precursor protein-binding family A member 3 OS=Mus musculus OX=10090 GN=Apba3 PE=1 SV=1	amyloid beta precursor protein binding family A member 3	APBA3	Cytoplasm	transporter	0	0	10.389	6	1	12	1	1	571	60.7	5.08	0	1	0	0.947	0.961	0.848201	0.457536	113.6	35.1	121.1	120.6	107.7	61.6	102.2	109.2	129	257839	79518.2	276846	273516	273037	141906	231737	247870	297133
Q61315	Adenomatous polyposis coli protein OS=Mus musculus OX=10090 GN=Apc PE=1 SV=1	APC regulator of WNT signaling pathway	APC	Nucleus	enzyme	0	0.095	1.673	0	1	3	1	1	2845	310.9	7.58	21	1	0	1.195	0.898	0.259689	0.924341	63.6	105.8	94.5	88.7	175	112.9	77.6	97.2	84.9	7.4427e+06	1.24392e+07	1.10594e+07	1.03882e+07	2.06393e+07	1.32227e+07	9.14616e+06	1.14023e+07	9.95658e+06
Q8R146	Acylamino-acid-releasing enzyme OS=Mus musculus OX=10090 GN=Apeh PE=1 SV=3	acylaminoacyl-peptide hydrolase	APEH	Cytoplasm	peptidase	0	0	341.443	54	24	335	24	1	732	81.5	5.59	3254	24	0	1.244	0.959	0.063672	0.633367	89.8	104.7	86.3	107.4	111.7	130.1	85.3	86.2	98.4	1.42305e+08	1.66013e+08	1.36926e+08	1.70158e+08	1.77011e+08	2.06048e+08	1.35309e+08	1.36482e+08	1.55919e+08
P28352	DNA-(apurinic or apyrimidinic site) lyase OS=Mus musculus OX=10090 GN=Apex1 PE=1 SV=2	apurinic/apyrimidinic endodeoxyribonuclease 1	APEX1	Nucleus	enzyme	0	0	30.978	11	2	27	2	1	317	35.5	7.91	461	2	0	1.01	1.007	0.793332	0.696675	103.2	105	79.3	104.2	110.8	82.5	140.6	103.9	70.5	4.62968e+06	4.72007e+06	3.56349e+06	4.74644e+06	4.96767e+06	3.70534e+06	6.31908e+06	4.6637e+06	3.17666e+06
O35841	Apoptosis inhibitor 5 OS=Mus musculus OX=10090 GN=Api5 PE=1 SV=2	apoptosis inhibitor 5	API5	Cytoplasm	other	0	0	38.475	11	5	33	5	1	504	56.8	5.92	327	5	0	0.875	1.059	0.271994	0.865264	88.2	142.9	100	87.6	103.8	58.6	105.9	132.3	80.8	6.92827e+06	1.12229e+07	7.85841e+06	6.87717e+06	8.3394e+06	4.82625e+06	8.33423e+06	1.03919e+07	6.60467e+06
Q9WVQ5	Methylthioribulose-1-phosphate dehydratase OS=Mus musculus OX=10090 GN=Apip PE=1 SV=1	APAF1 interacting protein	APIP	Cytoplasm	enzyme	0	0	15.369	6	1	1	1	1	241	26.9	6.9	23	1	0	1.379	1.163	0.226383	0.435135	109.8	80.6	54.1	130.3	111.2	88.9	159.8	71.5	93.8	2.04146e+06	1.50687e+06	1.00651e+06	2.42223e+06	2.07137e+06	1.77993e+06	2.97487e+06	1.37338e+06	1.76444e+06
Q06335	Amyloid-like protein 2 OS=Mus musculus OX=10090 GN=Aplp2 PE=1 SV=4	amyloid beta precursor like protein 2	APLP2	Cytoplasm	other	2	0	16.462	3	1	15	1	1	707	80.4	4.7	182	1	0	0.528	0.791	0.74431	0.532444	111.7	86.7	130	176.3	59	48.1	125.3	88.3	74.5	346982	268622	414001	516658	201114	156865	367138	264438	221468
Q9D7N9	Adipocyte plasma membrane-associated protein OS=Mus musculus OX=10090 GN=Apmap PE=1 SV=1	adipocyte plasma membrane associated protein	APMAP	Plasma Membrane	enzyme	1	0	299.629	59	17	306	17	1	415	46.4	6.32	2512	17	0	1.288	1.211	0.107686	0.013098	81.3	88.2	88	113.3	130.4	89.2	96.4	106.5	106.6	1.06192e+08	1.15166e+08	1.14766e+08	1.47818e+08	1.70194e+08	1.16537e+08	1.25811e+08	1.39082e+08	1.39197e+08
Q00623	Apolipoprotein A-I OS=Mus musculus OX=10090 GN=Apoa1 PE=1 SV=2	apolipoprotein A1	APOA1	Extracellular Space	transporter	0	0	111.115	43	12	138	12	1	264	30.6	5.73	1395	12	0	2.271	3.088	0.013636	0.078618	30.1	54.5	42.4	96.2	117.8	79.3	130.8	92.4	256.5	1.98782e+07	3.60445e+07	2.83014e+07	6.30528e+07	7.72324e+07	5.1954e+07	8.65821e+07	6.05878e+07	1.68167e+08
P09813	Apolipoprotein A-II OS=Mus musculus OX=10090 GN=Apoa2 PE=1 SV=2	apolipoprotein A2	APOA2	Extracellular Space	transporter	0	0.001	5.974	10	1	7	1	1	102	11.3	7.18	74	1	0	1.499	2.432	0.008898	0.007989	64	64.1	50.6	107	96	85.4	155.7	165.8	111.5	6.22262e+06	6.25392e+06	4.91679e+06	1.04028e+07	9.34029e+06	8.30153e+06	1.51371e+07	1.6119e+07	1.08404e+07
P06728	Apolipoprotein A-IV OS=Mus musculus OX=10090 GN=Apoa4 PE=1 SV=3	apolipoprotein A4	APOA4	Extracellular Space	transporter	0	0	79.537	34	12	61	12	1	395	45	5.47	838	12	0	1.943	2.358	0.035652	0.203534	34.8	47.3	47.2	100.9	91.8	59.7	111.4	65.6	341.3	1.9119e+07	2.61753e+07	2.62505e+07	5.54238e+07	5.03808e+07	3.29243e+07	6.11884e+07	3.62431e+07	1.87973e+08
P34928	Apolipoprotein C-I OS=Mus musculus OX=10090 GN=Apoc1 PE=1 SV=1	apolipoprotein C-I	Apoc1	Extracellular Space	other	0	0.031	2.573	10	1	10	1	1	88	9.7	9.09	97	1	0	3.57	6.779	0.096307	0.011794	22.3	54.1	25.8	92.3	171.7	61.4	175.2	105.8	191.4	2.14821e+06	5.24641e+06	2.49167e+06	8.88282e+06	1.65405e+07	5.91656e+06	1.69208e+07	1.02494e+07	1.84523e+07
P08226	Apolipoprotein E OS=Mus musculus OX=10090 GN=Apoe PE=1 SV=2	apolipoprotein E	APOE	Extracellular Space	transporter	0	0	17.046	7	2	20	2	1	311	35.8	5.68	215	2	0	2.423	1.94	0.003592	0.221492	48	52.3	72.5	106.4	127.3	126.6	101.4	58.6	207	1.38963e+06	1.51342e+06	2.10783e+06	3.08193e+06	3.6954e+06	3.67379e+06	2.94136e+06	1.69572e+06	6.35321e+06
Q91V80	Apolipoprotein F OS=Mus musculus OX=10090 GN=Apof PE=2 SV=2	apolipoprotein F	APOF	Extracellular Space	transporter	0	0	11.535	9	2	3	2	1	315	34.3	5.82	34	2	0	1.692	2.167	0.079056	0.230283	42.5	34.8	41.2	69.6	109.6	55.1	89.2	73.7	384.2	722606	592507	699488	1.18733e+06	1.86745e+06	936449	1.54752e+06	1.26606e+06	6.54773e+06
Q01339	Beta-2-glycoprotein 1 OS=Mus musculus OX=10090 GN=Apoh PE=1 SV=1	apolipoprotein H	APOH	Extracellular Space	transporter	0	0	352.008	54	19	570	19	1	345	38.6	8.22	6733	19	0	1.678	2.619	0.031732	0.030295	57.4	57.8	51.1	117.1	74.4	96.4	150.5	98.7	196.5	1.85352e+08	1.86624e+08	1.65195e+08	3.77898e+08	2.40243e+08	3.11046e+08	4.85577e+08	3.18541e+08	6.34039e+08
Q9DCZ4	MICOS complex subunit Mic26 OS=Mus musculus OX=10090 GN=Apoo PE=1 SV=2	apolipoprotein O	APOO	Extracellular Space	other	1	0	27.172	18	3	23	3	1	198	22.6	9.25	364	3	0	0.795	0.76	0.236471	0.353233	87.6	116	141.7	105.3	92.3	68.4	88.2	114	86.5	1.76304e+07	2.33464e+07	2.8777e+07	2.12166e+07	1.88466e+07	1.38099e+07	1.77487e+07	2.32824e+07	1.74812e+07
Q78IK4	MICOS complex subunit Mic27 OS=Mus musculus OX=10090 GN=Apool PE=1 SV=1	apolipoprotein O like	APOOL	Extracellular Space	other	0	0	74.997	37	6	66	6	1	265	29.2	9.31	1838	6	0	0.872	0.959	0.48231	0.633202	99.9	68.6	176.9	117.2	55.7	87.2	95.8	87.7	111	1.80401e+07	1.2298e+07	3.16491e+07	2.10018e+07	9.96257e+06	1.56267e+07	1.71447e+07	1.5688e+07	1.98545e+07
P12023	Amyloid-beta A4 protein OS=Mus musculus OX=10090 GN=App PE=1 SV=3	amyloid beta precursor protein	APP	Plasma Membrane	other	1	0	21.114	4	2	24	2	1	770	86.7	4.79	381	2	0	0.832	0.8	0.056007	0.999182	106.5	116.4	97.7	88.6	94.4	75.6	85.3	166.3	69.1	5.59396e+06	6.2824e+06	5.15904e+06	4.64235e+06	4.9445e+06	3.9704e+06	4.46327e+06	8.89943e+06	3.61769e+06
Q8K3H0	DCC-interacting protein 13-alpha OS=Mus musculus OX=10090 GN=Appl1 PE=1 SV=1	adaptor protein, phosphotyrosine interacting with PH domain and leucine zipper 1	APPL1	Cytoplasm	other	0	0	13.791	10	4	22	4	1	707	79.3	5.41	284	4	0	0.89	0.939	0.468156	0.671845	104.9	72.8	151.9	93.3	80.6	99	107.7	91.4	98.4	2.66874e+06	1.85414e+06	3.86549e+06	2.39137e+06	2.05121e+06	2.53484e+06	2.74102e+06	2.33005e+06	2.54352e+06
Q8K3G9	DCC-interacting protein 13-beta OS=Mus musculus OX=10090 GN=Appl2 PE=1 SV=1	adaptor protein, phosphotyrosine interacting with PH domain and leucine zipper 2	APPL2	Cytoplasm	other	0	0	42.623	6	3	50	2	1	662	73.8	5.03	912	3	0	0.69	1.279	0.746784	0.740453	97.1	49.2	153.1	56.5	67	135.5	64.6	124.3	152.8	820439	404710	1.40242e+06	551413	636087	1.1158e+06	595624	1.03581e+06	1.2061e+06
P08030	Adenine phosphoribosyltransferase OS=Mus musculus OX=10090 GN=Aprt PE=1 SV=2	adenine phosphoribosyltransferase	APRT	Cytoplasm	enzyme	0	0	46.575	32	3	51	3	1	180	19.7	6.79	805	3	0	2.25	1.749	0.014875	0.198876	48.7	44.2	61.6	109.6	148.6	97.2	231.4	73.5	85.2	1.2118e+06	1.27391e+06	1.56646e+06	2.7413e+06	3.7461e+06	2.49195e+06	6.54454e+06	1.82579e+06	2.11696e+06
Q02013	Aquaporin-1 OS=Mus musculus OX=10090 GN=Aqp1 PE=1 SV=3	aquaporin 1 (Colton blood group)	AQP1	Plasma Membrane	transporter	6	0	297.177	57	14	495	14	1	269	28.8	7.43	8035	14	0	0.677	0.686	0.020379	0.367767	117.3	141.1	109.3	91.6	71.4	79.4	80.5	143.3	66.2	7.87897e+08	9.44855e+08	7.33215e+08	6.16262e+08	4.78571e+08	5.3383e+08	5.43999e+08	9.59585e+08	4.44961e+08
P56402	Aquaporin-2 OS=Mus musculus OX=10090 GN=Aqp2 PE=1 SV=2	aquaporin 2	AQP2	Plasma Membrane	transporter	6	0	58.281	14	6	162	6	1	271	28.9	6.93	1835	6	0	0.962	1.041	0.497772	0.66611	102	97.4	81.7	141.2	93.7	86.8	114.9	81	101.4	3.38322e+08	3.22315e+08	2.69876e+08	4.67758e+08	3.09512e+08	2.87513e+08	3.80126e+08	2.6846e+08	3.35034e+08
Q8R2N1	Aquaporin-3 OS=Mus musculus OX=10090 GN=Aqp3 PE=1 SV=1	aquaporin 3 (Gill blood group)	AQP3	Plasma Membrane	transporter	6	0	11.443	3	1	32	1	1	292	31.5	7.18	606	1	0	1.359	1.914	0.290878	0.177991	80.2	36.1	76.5	185.7	53.1	104	146.5	57.8	160.1	1.82809e+07	8.39843e+06	1.76614e+07	4.31127e+07	1.21202e+07	2.46477e+07	3.32608e+07	1.37471e+07	3.66402e+07
O54794	Aquaporin-7 OS=Mus musculus OX=10090 GN=Aqp7 PE=1 SV=1	aquaporin 7	AQP7	Plasma Membrane	transporter	6	0	59.978	18	4	58	4	1	303	32.6	8.7	1378	4	0	0.452	0.54	0.008205	0.016758	125.8	152.4	159.7	49.3	68.9	90.3	65.6	105.7	82.3	2.17665e+07	2.63732e+07	2.76372e+07	8.5497e+06	1.19249e+07	1.56137e+07	1.13616e+07	1.82906e+07	1.42405e+07
P04627	Serine/threonine-protein kinase A-Raf OS=Mus musculus OX=10090 GN=Araf PE=1 SV=2	A-Raf proto-oncogene, serine/threonine kinase	ARAF	Cytoplasm	kinase	0	0	57.038	11	6	53	6	1	604	67.5	9.11	347	6	0	1.061	0.947	0.936956	0.482957	110.1	94.1	99.9	107.6	92.3	105.9	104.2	91.2	94.6	1.46702e+07	1.253e+07	1.3301e+07	1.43492e+07	1.23e+07	1.41188e+07	1.38772e+07	1.22172e+07	1.25998e+07
Q8R5G7	Arf-GAP with Rho-GAP domain, ANK repeat and PH domain-containing protein 3 OS=Mus musculus OX=10090 GN=Arap3 PE=1 SV=3	ArfGAP with RhoGAP domain, ankyrin repeat and PH domain 3	ARAP3	Cytoplasm	other	0	0.002	5.715	1	1	3	1	1	1538	169.6	6.84	25	1	0	1.051	0.918	0.608605	0.815007	105.1	46.3	127	83.3	110.4	130.9	90.2	96.5	110.3	389253	170964	470979	312234	407929	490500	333697	356136	414093
Q5XJY5	Coatomer subunit delta OS=Mus musculus OX=10090 GN=Arcn1 PE=1 SV=2	archain 1	ARCN1	Cytoplasm	other	0	0	85.393	21	10	152	10	1	511	57.2	6.21	2783	10	0	0.983	0.958	0.620075	0.775656	109.1	107.1	77.8	105.3	142.6	79.7	102.5	110.2	65.7	1.00837e+08	9.8926e+07	7.19111e+07	9.75572e+07	1.31725e+08	7.36874e+07	9.49564e+07	1.01753e+08	6.10007e+07
P84078	ADP-ribosylation factor 1 OS=Mus musculus OX=10090 GN=Arf1 PE=1 SV=2	ADP ribosylation factor 1	ARF1	Cytoplasm	enzyme	0	0	383.904	87	16	325	12	1	181	20.7	6.8	3646	16	4	1.077	0.998	0.511124	0.622419	105.5	40.4	114.8	113.6	74.3	137	105.3	62.8	146.3	8.62047e+07	3.45023e+07	9.47002e+07	9.29613e+07	6.09053e+07	1.12007e+08	8.60125e+07	5.37907e+07	1.19594e+08
P61750	ADP-ribosylation factor 4 OS=Mus musculus OX=10090 GN=Arf4 PE=1 SV=2	ADP ribosylation factor 4	ARF4	Cytoplasm	enzyme	0	0	114.867	66	9	98	4	1	180	20.4	7.14	1185	9	0	1.081	1.054	0.578676	0.587028	109	61.9	99.4	149.5	64.7	107.5	128.6	74.5	104.8	2.83946e+07	1.6058e+07	2.57808e+07	3.8788e+07	1.68385e+07	2.78745e+07	3.33453e+07	1.93202e+07	2.71605e+07
P84084	ADP-ribosylation factor 5 OS=Mus musculus OX=10090 GN=Arf5 PE=1 SV=2	ADP ribosylation factor 5	ARF5	Cytoplasm	enzyme	0	0	91.76	58	7	55	2	1	180	20.5	6.79	702	7	0	0.847	0.768	0.935548	0.797772	120	47.4	144.6	114.8	87.7	101.7	126.7	65	92.2	1.20287e+06	467859	1.44702e+06	1.13527e+06	866288	1.08152e+06	1.35537e+06	720310	918688
P62331	ADP-ribosylation factor 6 OS=Mus musculus OX=10090 GN=Arf6 PE=1 SV=2	ADP ribosylation factor 6	ARF6	Plasma Membrane	transporter	0	0	60.791	54	5	44	5	1	175	20.1	8.95	539	5	0	0.866	0.639	0.707424	0.901168	107.8	46.7	128.5	88.7	93.3	135.8	68.8	64.9	165.6	1.51496e+07	6.5656e+06	1.82737e+07	1.26416e+07	1.30765e+07	1.90471e+07	9.74922e+06	9.14734e+06	2.31925e+07
Q99K28	ADP-ribosylation factor GTPase-activating protein 2 OS=Mus musculus OX=10090 GN=Arfgap2 PE=1 SV=1	ADP ribosylation factor GTPase activating protein 2	ARFGAP2	Nucleus	other	0	0.001	6.699	3	2	9	1	1	520	56.6	8.18	52	2	1	0.712	0.872	0.294862	0.808539	78.4	119.5	113.2	80.6	100.5	76.7	98.7	153.9	78.6	2.53348e+07	3.87147e+07	3.66708e+07	2.6136e+07	3.24932e+07	2.48345e+07	3.22512e+07	5.00868e+07	2.54729e+07
Q9D8S3	ADP-ribosylation factor GTPase-activating protein 3 OS=Mus musculus OX=10090 GN=Arfgap3 PE=1 SV=2	ADP ribosylation factor GTPase activating protein 3	ARFGAP3	Cytoplasm	transporter	0	0	11.091	4	2	9	1	1	523	57.4	8.47	92	2	0	0.789	1.019	0.916885	0.682558	51.2	119.5	119.7	93.9	94.7	94.2	121.7	78.1	127	310328	700293	707193	579297	547049	554703	715995	443096	736450
G3X9K3	Brefeldin A-inhibited guanine nucleotide-exchange protein 1 OS=Mus musculus OX=10090 GN=Arfgef1 PE=1 SV=1	ADP ribosylation factor guanine nucleotide exchange factor 1	ARFGEF1	Cytoplasm	other	0	0	67.642	5	7	70	5	1	1846	208.4	5.86	1431	7	0	0.844	0.867	0.27353	0.438694	115.5	91.7	115.7	97.4	79.7	104.5	109.8	85.4	100.2	1.25132e+07	9.93449e+06	1.25466e+07	1.05629e+07	8.63876e+06	1.13225e+07	1.18981e+07	9.26095e+06	1.08615e+07
A2A5R2	Brefeldin A-inhibited guanine nucleotide-exchange protein 2 OS=Mus musculus OX=10090 GN=Arfgef2 PE=1 SV=1	ADP ribosylation factor guanine nucleotide exchange factor 2	ARFGEF2	Cytoplasm	other	0	0	113.158	12	13	86	11	1	1792	202.1	6.55	1382	13	2	0.848	0.889	0.158884	0.352556	138.8	93.9	107.1	90.8	88.8	91	112.2	95.2	82.3	3.51576e+07	2.38527e+07	2.77431e+07	2.29942e+07	2.42407e+07	2.35488e+07	2.84339e+07	2.45863e+07	2.17439e+07
Q8K221	Arfaptin-2 OS=Mus musculus OX=10090 GN=Arfip2 PE=1 SV=2	ADP ribosylation factor interacting protein 2	ARFIP2	Cytoplasm	other	0	0	19.377	19	4	9	4	1	341	37.7	5.87	90	4	0	1.444	1.221	0.766722	0.952157	82.5	157.7	48.7	119.1	153.2	57.3	100.8	126.8	53.9	2.40773e+07	4.59675e+07	1.41969e+07	3.47917e+07	4.52631e+07	1.67274e+07	2.93858e+07	3.6966e+07	1.5766e+07
Q8BXL7	ADP-ribosylation factor-related protein 1 OS=Mus musculus OX=10090 GN=Arfrp1 PE=1 SV=2	ADP ribosylation factor related protein 1	ARFRP1	Cytoplasm	enzyme	0	0.119	1.53	4	1	1	1	1	201	22.6	6.55	0	1	0	1.379	1.761	0.317258	0.372579	44.3	73.6	122.5	98.4	101.5	123	139.4	67.7	129.6	162085	263093	428499	349761	358365	425975	488329	239416	451352
Q5FWK3	Rho GTPase-activating protein 1 OS=Mus musculus OX=10090 GN=Arhgap1 PE=1 SV=1	Rho GTPase activating protein 1	ARHGAP1	Cytoplasm	other	1	0	172.519	45	15	287	14	1	439	50.4	6.44	3499	15	0	1.016	0.919	0.863113	0.822964	109.2	92.4	104.2	116	77	105.8	123.3	76.3	95.8	1.39605e+08	1.18206e+08	1.33163e+08	1.48304e+08	9.87768e+07	1.35366e+08	1.57662e+08	9.75435e+07	1.2243e+08
Q3UIA2	Rho GTPase-activating protein 17 OS=Mus musculus OX=10090 GN=Arhgap17 PE=1 SV=1	Rho GTPase activating protein 17	ARHGAP17	Cytoplasm	other	0	0	74.683	13	8	76	8	1	846	92.1	7.56	1110	8	0	0.754	0.968	0.662484	0.758807	62.9	113.6	97.8	70.3	189.3	73.8	80.9	116.7	94.7	1.06317e+07	1.92298e+07	1.66218e+07	1.18717e+07	3.20092e+07	1.31338e+07	1.38522e+07	1.97328e+07	1.60246e+07
Q8K0Q5	Rho GTPase-activating protein 18 OS=Mus musculus OX=10090 GN=Arhgap18 PE=1 SV=1	Rho GTPase activating protein 18	ARHGAP18	Cytoplasm	other	0	0	51.298	7	4	101	4	1	663	74.9	6.73	968	4	0	1.227	1.216	0.727586	0.569042	77	86.4	121.7	107.3	106	88.5	105.1	93	114.9	1.00951e+07	1.12674e+07	1.58639e+07	1.39735e+07	1.39081e+07	1.17267e+07	1.36968e+07	1.21897e+07	1.49829e+07
Q8C4V1	Rho GTPase-activating protein 24 OS=Mus musculus OX=10090 GN=Arhgap24 PE=1 SV=2	Rho GTPase activating protein 24	ARHGAP24	Cytoplasm	other	0	0	27.821	4	2	17	2	1	747	84	6.95	78	2	0	0.972	1.11	0.432872	0.593212	115.8	48.5	101.5	133.2	95.9	98.7	114.1	79.7	112.6	1.80253e+06	865520	1.68715e+06	2.06473e+06	1.51984e+06	1.53847e+06	1.77329e+06	1.40556e+06	1.86601e+06
A2AB59	Rho GTPase-activating protein 27 OS=Mus musculus OX=10090 GN=Arhgap27 PE=1 SV=1	Rho GTPase activating protein 27	ARHGAP27	Cytoplasm	other	0	0	13.918	3	2	8	2	1	869	97	5.94	13	2	0	1.314	1.161	0.466977	0.576403	66.7	88.1	119.3	82.3	115.8	123.9	90.7	102.3	110.9	1.46067e+06	1.93039e+06	2.61472e+06	1.80179e+06	2.53671e+06	2.72217e+06	1.9858e+06	2.25309e+06	2.44961e+06
Q8CGF1	Rho GTPase-activating protein 29 OS=Mus musculus OX=10090 GN=Arhgap29 PE=1 SV=1	Rho GTPase activating protein 29	ARHGAP29	Cytoplasm	other	0	0	25.763	5	3	9	3	1	1266	142.3	7.17	27	3	0	0.867	1.016	0.786817	0.738572	98.7	40	162.5	85.7	84.4	170.5	109.4	48.4	100.3	1.50293e+06	611536	2.46877e+06	1.30109e+06	1.28237e+06	2.60757e+06	1.66194e+06	759179	1.52374e+06
Q811P8	Rho GTPase-activating protein 32 OS=Mus musculus OX=10090 GN=Arhgap32 PE=1 SV=2	Rho GTPase activating protein 32	ARHGAP32	Cytoplasm	other	0	0.001	9.139	1	2	31	2	1	2089	229.6	6.86	88	2	0	1.197	1.146	0.166248	0.175526	88.9	95.1	83.1	106.4	129.4	90.8	89.8	114.5	101.9	2.45338e+06	2.6288e+06	2.31042e+06	2.93515e+06	3.56873e+06	2.50686e+06	2.47844e+06	3.16303e+06	2.82064e+06
Q91YM2	Rho GTPase-activating protein 35 OS=Mus musculus OX=10090 GN=Arhgap35 PE=1 SV=3	Rho GTPase activating protein 35	ARHGAP35	Nucleus	transcription regulator	0	0.009	3.951	1	1	7	1	1	1499	170.3	6.61	54	1	0	0.674	0.838	0.522633	0.781621	52.6	130.3	205	87.9	73.2	128.2		89.7	133.1	188511	462486	817424	311640	276295	477425		329233	498685
P97393	Rho GTPase-activating protein 5 OS=Mus musculus OX=10090 GN=Arhgap5 PE=1 SV=2	Rho GTPase activating protein 5	ARHGAP5	Cytoplasm	enzyme	0	0	31.747	4	4	35	4	1	1501	172	6.34	837	4	0	0.793	1.011	0.614168	0.629684	109.2	72.6	121.3	86.6	62.9	118.1	110.3	95.4	123.6	2.93475e+06	1.94988e+06	3.28497e+06	2.3898e+06	1.82838e+06	3.17468e+06	2.9647e+06	2.57882e+06	3.3376e+06
O54834	Rho GTPase-activating protein 6 OS=Mus musculus OX=10090 GN=Arhgap6 PE=1 SV=3	Rho GTPase activating protein 6	ARHGAP6	Cytoplasm	other	0	0	12.665	3	2	11	2	1	987	108.8	8.28	44	2	0	0.859	0.985	0.985673	0.880107	105.6	48.8	141.8	90.7	81.9	121.9	109.8	95.6	104	518866	239930	701285	447949	402456	599899	546032	488750	511546
Q99PT1	Rho GDP-dissociation inhibitor 1 OS=Mus musculus OX=10090 GN=Arhgdia PE=1 SV=3	Rho GDP dissociation inhibitor alpha	ARHGDIA	Cytoplasm	other	0	0	137.957	46	8	204	8	1	204	23.4	5.2	2796	8	0	1.75	1.391	0.000442	0.165193	80.9	72.5	70.5	120.9	126.9	134	100.9	73.5	119.9	7.33659e+07	6.57609e+07	6.39248e+07	1.09644e+08	1.15113e+08	1.21465e+08	9.14989e+07	6.66552e+07	1.08719e+08
Q61599	Rho GDP-dissociation inhibitor 2 OS=Mus musculus OX=10090 GN=Arhgdib PE=1 SV=3	Rho GDP dissociation inhibitor beta	ARHGDIB	Cytoplasm	enzyme	0	0.002	5.715	11	1	1	1	1	200	22.8	5.11	17	1	0	1.298	1.471	0.717458	0.762755	91.2		108.1	165.2	55.3	128.8	168.5	36.8	146.1	1.02423e+06		1.22245e+06	1.85787e+06	632862	1.47105e+06	1.90396e+06	412560	1.63846e+06
Q61210	Rho guanine nucleotide exchange factor 1 OS=Mus musculus OX=10090 GN=Arhgef1 PE=1 SV=2	Rho guanine nucleotide exchange factor 1	ARHGEF1	Cytoplasm	other	0	0	49.88	10	6	78	6	1	920	102.7	5.6	949	6	0	1.288	1.161	0.101791	0.167222	74.8	94.4	86.4	111.3	143.8	96.4	104.1	88.5	100.3	4.99945e+06	6.34597e+06	5.78373e+06	7.43607e+06	9.63263e+06	6.47517e+06	6.95897e+06	5.918e+06	6.7078e+06
Q8R4H2	Rho guanine nucleotide exchange factor 12 OS=Mus musculus OX=10090 GN=Arhgef12 PE=1 SV=2	Rho guanine nucleotide exchange factor 12	ARHGEF12	Cytoplasm	other	0	0	81.834	10	12	69	12	1	1543	172.2	5.74	1052	12	0	1.079	1.046	0.625026	0.841551	89.6	128.8	92.8	100.1	105.2	83.4	97	122.1	81	2.80743e+07	4.02059e+07	2.90163e+07	3.13508e+07	3.28725e+07	2.60442e+07	3.03486e+07	3.82158e+07	2.527e+07
Q5FWH6	Rho guanine nucleotide exchange factor 15 OS=Mus musculus OX=10090 GN=Arhgef15 PE=1 SV=1	Rho guanine nucleotide exchange factor 15	ARHGEF15	Cytoplasm	other	0	0	9.777	3	2	20	2	1	849	92.9	8.34	24	2	0	1.093	1.112	0.358957	0.619187	88.5	47.1	119.5	96.7	93.1	156.6	98.4	70.9	129.2	673596	357990	907576	735832	707129	1.19414e+06	750724	548064	981997
Q3U5C8	Rho guanine nucleotide exchange factor 16 OS=Mus musculus OX=10090 GN=Arhgef16 PE=1 SV=3	Rho guanine nucleotide exchange factor 16	ARHGEF16	Cytoplasm	other	0	0	49.594	15	6	36	6	1	713	80.3	7.49	175	6	0	0.98	1.012	0.9171	0.397408	96.4	95.6	116.9	94.5	94.2	116.8	101.2	86.8	97.6	9.51972e+06	9.83049e+06	1.15515e+07	9.32472e+06	9.32281e+06	1.15041e+07	9.98894e+06	8.87922e+06	9.64562e+06
Q6P9R4	Rho guanine nucleotide exchange factor 18 OS=Mus musculus OX=10090 GN=Arhgef18 PE=1 SV=2	Rho/Rac guanine nucleotide exchange factor 18	ARHGEF18	Cytoplasm	other	0	0.032	2.516	1	1	4	1	1	1021	114.3	6.21	0	1	0	present in sham only	1.134		0.210242	294.8	279.6						325.6		7.90478e+06	7.49799e+06						8.73066e+06
Q60875	Rho guanine nucleotide exchange factor 2 OS=Mus musculus OX=10090 GN=Arhgef2 PE=1 SV=4	Rho/Rac guanine nucleotide exchange factor 2	ARHGEF2	Cytoplasm	other	0	0	74.431	7	4	40	4	1	985	111.9	7.25	269	4	0	0.741	0.883	0.865442	0.551363	138.3	69.7	113.4	164.6	51.6	84	100.1	74.5	103.8	3.49237e+06	1.75638e+06	2.86067e+06	4.18158e+06	1.31385e+06	2.11706e+06	2.52348e+06	1.87719e+06	2.62577e+06
P97433	Rho guanine nucleotide exchange factor 28 OS=Mus musculus OX=10090 GN=Arhgef28 PE=1 SV=1	Rho guanine nucleotide exchange factor 28	ARHGEF28	Cytoplasm	other	0	0	25.568	2	3	10	3	1	1693	190.2	5.97	106	3	0	0.898	0.599	0.613196	0.066191	86.1	146.6	127.8	114.8	93.6	119.9	76.5	81.3	53.5	5.63025e+06	9.4521e+06	7.76187e+06	7.90439e+06	7.97379e+06	7.67708e+06	6.14922e+06	5.67893e+06	4.81477e+06
E9Q7D5	Rho guanine nucleotide exchange factor 5 OS=Mus musculus OX=10090 GN=Arhgef5 PE=1 SV=1	Rho guanine nucleotide exchange factor 5	ARHGEF5	Cytoplasm	other	0	0	11.263	2	2	10	2	1	1581	176.6	5.83	45	2	0	1.008	1.264	0.451605	0.762906	63.2	24.8	238.8	28.1	63.8	67.3	260.6	73.5	79.9	657250	261227	2.48297e+06	292482	743095	1.32389e+06	2.76022e+06	768388	830530
Q9ES28	Rho guanine nucleotide exchange factor 7 OS=Mus musculus OX=10090 GN=Arhgef7 PE=1 SV=2	Rho guanine nucleotide exchange factor 7	ARHGEF7	Cytoplasm	other	0	0	60.793	7	4	52	4	1	862	97	6.8	1013	4	0	1.202	1.155	0.088058	0.252883	92.2	70.3	100.9	102.8	110.9	117	106.5	91.1	108.3	5.26856e+06	4.01974e+06	5.80044e+06	5.87354e+06	6.32982e+06	6.68822e+06	6.09579e+06	5.23542e+06	6.18193e+06
P61211	ADP-ribosylation factor-like protein 1 OS=Mus musculus OX=10090 GN=Arl1 PE=1 SV=1	ADP ribosylation factor like GTPase 1	ARL1	Cytoplasm	enzyme	0	0	70.796	26	4	121	4	1	181	20.4	5.72	1348	4	0	0.799	0.818	0.311434	0.255822	116.9	83.3	169.6	113.5	60.5	93.4	98.8	68.3	95.7	1.5216e+07	1.08389e+07	2.20873e+07	1.48123e+07	7.88064e+06	1.21758e+07	1.28653e+07	8.90296e+06	1.25212e+07
Q8BIX3	ARL14 effector protein OS=Mus musculus OX=10090 GN=Arl14ep PE=1 SV=1	ADP ribosylation factor like GTPase 14 effector protein	ARL14EP	Other	other	0	0.045	2.223	6	1	2	1	1	276	31	8.24	0	1	0
Q8BGR6	ADP-ribosylation factor-like protein 15 OS=Mus musculus OX=10090 GN=Arl15 PE=1 SV=1	ADP ribosylation factor like GTPase 15	ARL15	Cytoplasm	other	0	0	28.813	39	4	38	4	1	204	22.9	5.29	1062	4	0	0.916	1.086	0.922184	0.565995	97.8	106	87.3	89.6	116.3	88.5	123.7	106.3	84.6	2.80965e+07	3.03693e+07	2.50803e+07	2.56711e+07	3.33306e+07	2.54571e+07	3.54632e+07	3.04681e+07	2.43562e+07
Q9D0J4	ADP-ribosylation factor-like protein 2 OS=Mus musculus OX=10090 GN=Arl2 PE=1 SV=1	ADP ribosylation factor like GTPase 2	ARL2	Cytoplasm	enzyme	0	0	12.528	20	2	20	2	1	184	20.9	5.96	495	2	0	1.37	0.904	0.109132	0.726949	7.5	103.4	102.7	122.1	156.4	140.7	25.6	92.9	148.8	608421	1.87102e+06	1.86238e+06	2.21824e+06	2.84197e+06	2.54395e+06	1.15105e+06	1.70054e+06	2.68977e+06
Q9WUL7	ADP-ribosylation factor-like protein 3 OS=Mus musculus OX=10090 GN=Arl3 PE=1 SV=1	ADP ribosylation factor like GTPase 3	ARL3	Cytoplasm	enzyme	0	0.001	9.386	6	1	18	1	1	182	20.5	7.24	331	1	0	2.36	2.323	0.013613	0.030352	54.9	78.3	34.7	106.6	145.7	129.6	132.7	89.8	127.6	4.16438e+06	5.93438e+06	2.63374e+06	8.08669e+06	1.11544e+07	9.84145e+06	1.00705e+07	6.85285e+06	9.73748e+06
O88848	ADP-ribosylation factor-like protein 6 OS=Mus musculus OX=10090 GN=Arl6 PE=1 SV=1	ADP ribosylation factor like GTPase 6	ARL6	Cytoplasm	transporter	0	0	24.078	16	3	36	3	1	186	20.9	8.25	473	3	0	0.945	1.094	0.779323	0.360265	115.6	62.3	95.2	126.4	76.2	89.9	135.3	94.9	104.1	4.62867e+06	2.50139e+06	3.8094e+06	5.07877e+06	3.05759e+06	3.62439e+06	5.47324e+06	3.81644e+06	4.16774e+06
Q9JKW0	ADP-ribosylation factor-like protein 6-interacting protein 1 OS=Mus musculus OX=10090 GN=Arl6ip1 PE=1 SV=1	ADP ribosylation factor like GTPase 6 interacting protein 1	ARL6IP1	Cytoplasm	other	4	0	60.486	29	4	223	4	1	203	23.4	9.32	2193	4	0	1.15	1.05	0.309619	0.762106	91	79	112.6	104.7	98.2	122	95.6	101.9	94.9	1.35407e+08	1.17691e+08	1.67418e+08	1.56462e+08	1.46116e+08	1.81984e+08	1.42559e+08	1.5163e+08	1.41273e+08
Q8R5J9	PRA1 family protein 3 OS=Mus musculus OX=10090 GN=Arl6ip5 PE=1 SV=2	ADP ribosylation factor like GTPase 6 interacting protein 5	ARL6IP5	Cytoplasm	other	4	0	61.488	24	6	101	6	1	188	21.5	9.61	683	6	0	0.95	1.048	0.525883	0.374204	96.9	67.1	106.6	122.3	89.4	92	135.6	88.6	101.5	1.40859e+07	9.80878e+06	1.55365e+07	1.78168e+07	1.30083e+07	1.34115e+07	1.97606e+07	1.28858e+07	1.47642e+07
Q8VEH3	ADP-ribosylation factor-like protein 8A OS=Mus musculus OX=10090 GN=Arl8a PE=1 SV=1	ADP ribosylation factor like GTPase 8A	ARL8A	Cytoplasm	enzyme	0	0	224.946	56	9	484	2	1	186	21.4	7.77	6095	9	0	0.713	0.407	0.78384	0.172478	66.5	140.1	160	67.9	99.9	163.6	44.7	100.3	57.1	1.7279e+07	3.12526e+07	3.58701e+07	1.59918e+07	2.52581e+07	3.6343e+07	1.31216e+07	2.27364e+07	1.52728e+07
Q9CQW2	ADP-ribosylation factor-like protein 8B OS=Mus musculus OX=10090 GN=Arl8b PE=1 SV=1	ADP ribosylation factor like GTPase 8B	ARL8B	Plasma Membrane	enzyme	0	0	334.603	69	15	631	8	1	186	21.5	8.43	9402	15	8	0.982	0.908	0.673336	0.174109	97.2	97.5	130.7	89.1	95.7	120.6	94	88.5	86.8	7.01806e+08	7.03627e+08	9.44272e+08	6.43368e+08	6.90525e+08	8.71638e+08	6.7889e+08	6.38632e+08	6.26553e+08
Q9D7A8	Armadillo repeat-containing protein 1 OS=Mus musculus OX=10090 GN=Armc1 PE=1 SV=1	armadillo repeat containing 1	ARMC1	Cytoplasm	other	0	0	23.26	19	2	10	2	1	282	31.2	5.57	15	2	0	1.169	0.648	0.733291	0.394065	88.8	95.1	119.5	33.7	218.1	111.1	49.5	122.4	61.6	2.34892e+06	2.57447e+06	3.15984e+06	898003	5.83585e+06	2.93326e+06	1.75463e+06	3.22915e+06	1.9399e+06
Q9D0L7	Armadillo repeat-containing protein 10 OS=Mus musculus OX=10090 GN=Armc10 PE=1 SV=1	armadillo repeat containing 10	ARMC10	Cytoplasm	other	1	0	25.016	13	2	10	2	1	306	33.3	7.99	192	2	0	0.941	0.811	0.981456	0.437546	147.5	80.3	95.8	90.1	162.7	68.2	77.7	117.3	60.4	2.85114e+06	1.53975e+06	1.90042e+06	2.2056e+06	3.13382e+06	1.3684e+06	1.48954e+06	2.30151e+06	1.15862e+06
Q9DBR3	Armadillo repeat-containing protein 8 OS=Mus musculus OX=10090 GN=Armc8 PE=1 SV=2	armadillo repeat containing 8	ARMC8	Nucleus	other	0	0	10.441	6	2	8	2	1	673	75.3	6.73	71	2	0	0.921	0.569	0.937296	0.78228	100.7	7.8	204.7	92.7	35.8	203.6	57.3	46.9	150.7	255567	19991.9	514229	232699	112774	511754	145673	121805	378126
Q9R0Q6	Actin-related protein 2/3 complex subunit 1A OS=Mus musculus OX=10090 GN=Arpc1a PE=1 SV=1	actin related protein 2/3 complex subunit 1A	ARPC1A	Extracellular Space	other	0	0	181.255	46	13	207	12	1	370	41.6	8.18	3210	13	1	1.084	1.062	0.931372	0.997591	114.6	87.6	98.9	108.6	82.1	107.2	109	86.9	105.1	1.72869e+08	1.32238e+08	1.49332e+08	1.63866e+08	1.23869e+08	1.61921e+08	1.64635e+08	1.31124e+08	1.588e+08
Q9WV32	Actin-related protein 2/3 complex subunit 1B OS=Mus musculus OX=10090 GN=Arpc1b PE=1 SV=4	actin related protein 2/3 complex subunit 1B	ARPC1B	Cytoplasm	other	0	0	174.952	39	10	214	9	1	372	41	8.35	3251	10	0	1.118	1.313	0.010456	0.099373	87.9	86.3	92.3	102.4	98.2	97.7	115.4	91.9	128	1.06695e+08	1.04893e+08	1.12078e+08	1.24372e+08	1.19252e+08	1.18748e+08	1.40145e+08	1.11578e+08	1.55469e+08
Q9CVB6	Actin-related protein 2/3 complex subunit 2 OS=Mus musculus OX=10090 GN=Arpc2 PE=1 SV=3	actin related protein 2/3 complex subunit 2	ARPC2	Cytoplasm	other	0	0	162.988	57	18	224	18	1	300	34.3	7.36	2251	18	0	1.228	1.067	0.037545	0.660589	85.2	88.7	98.1	109	108.7	131.1	94.6	86.6	98.1	1.46923e+08	1.53031e+08	1.69973e+08	1.88306e+08	1.87571e+08	2.26257e+08	1.63401e+08	1.49357e+08	1.69347e+08
Q9JM76	Actin-related protein 2/3 complex subunit 3 OS=Mus musculus OX=10090 GN=Arpc3 PE=1 SV=3	actin related protein 2/3 complex subunit 3	ARPC3	Cytoplasm	other	0	0	137.309	37	9	443	9	1	178	20.5	8.59	4941	9	0	1.001	1.127	0.914702	0.263151	111.4	78.1	90.9	109.4	91	84.2	131.7	100.7	102.5	2.34017e+08	1.6401e+08	1.91983e+08	2.30441e+08	1.9131e+08	1.76962e+08	2.77368e+08	2.12694e+08	2.16031e+08
P59999	Actin-related protein 2/3 complex subunit 4 OS=Mus musculus OX=10090 GN=Arpc4 PE=1 SV=3	actin related protein 2/3 complex subunit 4	ARPC4	Cytoplasm	other	0	0	41.594	31	7	140	7	1	168	19.7	8.43	1809	7	0	1.247	1.03	0.251852	0.834187	107.7	91.4	87.1	113.9	125.1	92.8	97.2	90.5	94.1	1.6196e+08	1.36965e+08	1.30457e+08	1.70688e+08	1.87535e+08	1.38966e+08	1.45817e+08	1.35584e+08	1.41231e+08
Q9CPW4	Actin-related protein 2/3 complex subunit 5 OS=Mus musculus OX=10090 GN=Arpc5 PE=1 SV=3	actin related protein 2/3 complex subunit 5	ARPC5	Cytoplasm	other	0	0	34.134	44	4	33	4	1	151	16.3	5.67	590	4	0	1.244	1.138	0.130151	0.093301	82.6	84.2	80	102.8	98.8	162.1	108.5	86.9	94	1.814e+07	1.85353e+07	1.75874e+07	2.25779e+07	2.16981e+07	3.56014e+07	2.38532e+07	1.91359e+07	2.06581e+07
Q9D898	Actin-related protein 2/3 complex subunit 5-like protein OS=Mus musculus OX=10090 GN=Arpc5l PE=1 SV=1	actin related protein 2/3 complex subunit 5 like	ARPC5L	Cytoplasm	other	0	0	28.4	22	3	23	3	1	153	17	6.8	400	3	0	1.031	0.953	0.50264	0.815795	94	93	99.9	87.4	96.9	135.2	115.6	89.5	88.6	1.03443e+07	1.02312e+07	1.10464e+07	9.6191e+06	1.06584e+07	1.49712e+07	1.2716e+07	9.91507e+06	9.7575e+06
Q8BWG8	Beta-arrestin-1 OS=Mus musculus OX=10090 GN=Arrb1 PE=1 SV=1	arrestin beta 1	ARRB1	Cytoplasm	other	0	0	33.959	16	4	44	4	1	418	46.9	6.28	182	4	0	1.313	0.879	0.010015	0.906399	93.4	74.2	91.9	118.9	137.3	120.7	77.6	80.8	105.1	5.354e+06	4.24855e+06	5.27098e+06	6.81119e+06	7.87679e+06	6.92655e+06	4.71009e+06	4.63233e+06	6.01891e+06
Q99KN1	Arrestin domain-containing protein 1 OS=Mus musculus OX=10090 GN=Arrdc1 PE=1 SV=2	arrestin domain containing 1	ARRDC1	Cytoplasm	other	0	0	16.824	7	3	7	3	1	434	46.3	7.21	41	3	0	1.045	1.051	0.380273	0.421305	30.1	112.1	95.4	76.4	180.5	99.7	95.6	100.4	109.7	2.23153e+06	7.46288e+06	6.36553e+06	5.0906e+06	1.20236e+07	6.64257e+06	6.36814e+06	6.6795e+06	7.304e+06
Q8R2G4	Ecto-ADP-ribosyltransferase 3 OS=Mus musculus OX=10090 GN=Art3 PE=1 SV=2	ADP-ribosyltransferase 3	ART3	Plasma Membrane	enzyme	0	0	15.489	6	1	1	1	1	371	42	6.02	22	1	0	1.265	0.744	0.088102	0.305922	100.1	97	103.6	128.7	126.6	102.8	74.5	112	54.7	887205	860072	917381	1.1397e+06	1.17243e+06	910116	725196	1.00521e+06	485798
Q9CRA0	Ecto-ADP-ribosyltransferase 4 OS=Mus musculus OX=10090 GN=Art4 PE=1 SV=1	ADP-ribosyltransferase 4 (Dombrock blood group)	ART4	Nucleus	enzyme	0	0	66.512	18	5	90	5	1	300	33.1	8.47	1092	5	0	1.1	1.3	0.854063	0.66714	96.3	48	145.5	105.9	57.9	106.9	125.2	70.6	143.6	1.49163e+07	7.4309e+06	2.25357e+07	1.64315e+07	9.03927e+06	1.6562e+07	1.93937e+07	1.09195e+07	2.22074e+07
P70352	Ecto-ADP-ribosyltransferase 5 OS=Mus musculus OX=10090 GN=Art5 PE=2 SV=3	ADP-ribosyltransferase 5	ART5	Extracellular Space	enzyme	0	0.113	1.558	8	1	1	1	1	309	34.3	8.19	0	1	0	present in sham only	present in sham only				900									285360
P98203	Armadillo repeat protein deleted in velo-cardio-facial syndrome homolog OS=Mus musculus OX=10090 GN=Arvcf PE=1 SV=2	ARVCF delta catenin family member	ARVCF	Plasma Membrane	other	0	0	201.219	20	12	218	12	1	962	105	6.64	3322	12	0	0.961	0.993	0.534044	0.728108	113	63.9	103.2	120.1	99.2	95.2	130.8	72.2	102.4	3.08935e+07	1.77857e+07	2.82057e+07	3.28351e+07	2.72807e+07	2.60362e+07	3.57626e+07	1.98289e+07	2.7995e+07
Q91WU5	Arsenite methyltransferase OS=Mus musculus OX=10090 GN=As3mt PE=1 SV=2	arsenite methyltransferase	AS3MT	Cytoplasm	enzyme	0	0	138.816	33	9	118	9	1	376	41.8	5.86	2290	9	0	1.487	1.53	0.073297	0.105123	99.8	75.4	64.3	127	97.8	112.1	117.2	91.1	115.4	3.79827e+07	2.86915e+07	2.44769e+07	4.83633e+07	3.72244e+07	4.26581e+07	4.46002e+07	3.46852e+07	4.39397e+07
Q9WV54	Acid ceramidase OS=Mus musculus OX=10090 GN=Asah1 PE=1 SV=1	N-acylsphingosine amidohydrolase 1	ASAH1	Cytoplasm	enzyme	0	0	148.477	32	13	228	13	1	394	44.6	8.46	4137	13	0	1.205	1.197	0.196825	0.372077	86.6	68.8	105.6	98	110.8	104.4	103.6	79	143.2	4.69966e+07	3.69307e+07	5.6739e+07	5.25892e+07	5.95152e+07	5.60678e+07	5.56344e+07	4.2411e+07	7.68367e+07
Q9JHE3	Neutral ceramidase OS=Mus musculus OX=10090 GN=Asah2 PE=1 SV=1	N-acylsphingosine amidohydrolase 2	ASAH2	Cytoplasm	enzyme	1	0	87.486	16	8	115	8	1	756	83.5	6.86	2568	8	0	0.664	0.668	0.057757	0.201686	142.5	133.5	104.6	88.7	59	100.2	89.1	127.4	55.1	9.41326e+07	8.61273e+07	6.80157e+07	5.85898e+07	3.84084e+07	6.46284e+07	5.8645e+07	8.22404e+07	3.55572e+07
Q7SIG6	Arf-GAP with SH3 domain, ANK repeat and PH domain-containing protein 2 OS=Mus musculus OX=10090 GN=Asap2 PE=1 SV=3	ArfGAP with SH3 domain, ankyrin repeat and PH domain 2	ASAP2	Nucleus	other	0	0	13.813	2	2	30	2	1	958	106.7	6.65	435	2	0	0.961	0.821	0.541387	0.797139	66.5	105.5	120.7	101.3	126.5	101.3	84.9	86.6	106.7	129130	204906	236150	197835	246686	197134	167548	168354	211267
Q9WV72	Ankyrin repeat and SOCS box protein 3 OS=Mus musculus OX=10090 GN=Asb3 PE=1 SV=2	ankyrin repeat and SOCS box containing 3	ASB3/GPR75-ASB3	Cytoplasm	transcription regulator	0	0.053	2.071	2	1	4	1	1	525	58.2	5.9	0	1	0	0.969	1.897	0.671575	0.778791	43.1	74.9	186.7	72.5	60	109.2	142.1	54.1	157.3	955622	1.65985e+06	4.14602e+06	1.60675e+06	1.34297e+06	2.4204e+06	3.15127e+06	1.20814e+06	3.48475e+06
Q91ZT8	Ankyrin repeat and SOCS box protein 9 OS=Mus musculus OX=10090 GN=Asb9 PE=1 SV=2	ankyrin repeat and SOCS box containing 9	ASB9	Nucleus	transcription regulator	0	0	12.745	16	2	3	2	1	290	31.6	7.56	0	2	0
Q91WR3	Activating signal cointegrator 1 complex subunit 2 OS=Mus musculus OX=10090 GN=Ascc2 PE=1 SV=1	activating signal cointegrator 1 complex subunit 2	ASCC2	Nucleus	other	0	0.043	2.292	1	1	1	1	1	749	85.6	5.03	16	1	0	1.056	1.103	0.265547	0.174259	99.2	50.7	100.4	104.8	112.4	98.5	109.5	119.4	105.1	629471	320804	634027	663088	709799	625666	698757	754188	664626
Q91YI0	Argininosuccinate lyase OS=Mus musculus OX=10090 GN=Asl PE=1 SV=1	argininosuccinate lyase	ASL	Cytoplasm	enzyme	0	0	364.233	54	23	657	23	1	464	51.7	6.96	12552	23	0	0.968	1.157	0.87457	0.930544	123.5	92.7	79.4	125.2	89.6	89.7	107.2	83.5	109.2	4.76451e+08	3.56793e+08	3.05694e+08	4.82991e+08	3.44887e+08	3.46469e+08	4.1378e+08	3.21575e+08	4.21069e+08
Q8R3P0	Aspartoacylase OS=Mus musculus OX=10090 GN=Aspa PE=1 SV=2	aspartoacylase	ASPA	Cytoplasm	enzyme	0	0	155.444	39	11	134	11	1	312	35.3	6.58	1822	11	0	1.636	1.364	0.01523	0.20839	87	56.6	76.9	125.9	109.4	140.9	126.9	71.5	104.9	4.37316e+07	2.8435e+07	3.86599e+07	6.32509e+07	5.49871e+07	7.08126e+07	6.39202e+07	3.59249e+07	5.2986e+07
Q9DCQ2	Putative L-aspartate dehydrogenase OS=Mus musculus OX=10090 GN=Aspdh PE=1 SV=1	aspartate dehydrogenase domain containing	ASPDH	Other	other	0	0.051	2.09	3	1	11	1	1	287	30.3	6.95	181	1	0	1.531	1.244	0.079381	0.004245	75.3	73.8	82.7	100	115.2	172.3	93.6	92.8	94.4	2.33038e+06	2.28015e+06	2.56161e+06	3.09091e+06	3.58289e+06	5.32693e+06	2.90198e+06	2.90167e+06	2.91654e+06
Q8BSY0	Aspartyl/asparaginyl beta-hydroxylase OS=Mus musculus OX=10090 GN=Asph PE=1 SV=1	aspartate beta-hydroxylase	ASPH	Cytoplasm	enzyme	1	0	54.355	14	7	34	7	1	741	83	5.08	231	7	0	1.757	1.445	0.054378	0.001406	80.3	73.1	69.9	128.4	139.6	87	112.6	105.6	103.3	1.08107e+07	9.86286e+06	9.40703e+06	1.72653e+07	1.88043e+07	1.17232e+07	1.51637e+07	1.42082e+07	1.39512e+07
Q8VBT9	Tether containing UBX domain for GLUT4 OS=Mus musculus OX=10090 GN=Aspscr1 PE=1 SV=1	ASPSCR1 tether for SLC2A4, UBX domain containing	ASPSCR1	Cytoplasm	other	0	0	32.838	5	2	33	2	1	550	59.8	6.96	352	2	0	1.235	0.889	0.307587	0.965995	105.2	87.2	92.2	113.8	131.4	87.7	123	77.6	81.9	5.89453e+06	4.90761e+06	5.16874e+06	6.37658e+06	7.46687e+06	4.91299e+06	6.8916e+06	4.58848e+06	4.5853e+06
P16460	Argininosuccinate synthase OS=Mus musculus OX=10090 GN=Ass1 PE=1 SV=1	argininosuccinate synthase 1	ASS1	Cytoplasm	enzyme	0	0	1343.77	87	48	5196	48	1	412	46.6	8.22	76294	48	0	1.075	1.296	0.684322	0.626811	125.2	86.9	68.7	128.2	93.4	86.8	113.3	85	112.6	1.18395e+10	8.21342e+09	6.49826e+09	1.21202e+10	8.83065e+09	8.20605e+09	1.07083e+10	8.03125e+09	1.06425e+10
Q9D5T0	ATPase family AAA domain-containing protein 1 OS=Mus musculus OX=10090 GN=Atad1 PE=1 SV=1	ATPase family AAA domain containing 1	ATAD1	Plasma Membrane	enzyme	0	0	32.755	18	5	43	5	1	361	40.7	6.9	591	5	0	1.262	1.39	0.945204	0.601485	78.3	79.1	133.7	113.5	99.9	72.9	110	110.6	102	8.87042e+06	8.91203e+06	1.50797e+07	1.27188e+07	1.11583e+07	8.51868e+06	1.25856e+07	1.23632e+07	1.16944e+07
Q925I1	ATPase family AAA domain-containing protein 3 OS=Mus musculus OX=10090 GN=Atad3 PE=1 SV=1	ATPase family AAA domain containing 3A	ATAD3A	Cytoplasm	other	0	0.001	9.618	3	2	11	2	1	591	66.7	9.29	224	2	0	0.891	0.918	0.31765	0.475798	91.2	95.3	167.6	110.1	61.6	84.9	87.4	81.8	120	8.58393e+06	8.94947e+06	1.57545e+07	1.03553e+07	5.80413e+06	7.97948e+06	8.21661e+06	7.71375e+06	1.12796e+07
Q9CPX6	Ubiquitin-like-conjugating enzyme ATG3 OS=Mus musculus OX=10090 GN=Atg3 PE=1 SV=1	autophagy related 3	ATG3	Cytoplasm	enzyme	0	0	27.695	8	2	29	2	1	314	35.8	4.72	698	2	0	1.137	0.979	0.237172	0.858184	99	108.3	78.8	112.6	124	97.7	97	103.1	79.6	1.70432e+07	1.85636e+07	1.35089e+07	1.92904e+07	2.14268e+07	1.68281e+07	1.66504e+07	1.78109e+07	1.37311e+07
Q8BGE6	Cysteine protease ATG4B OS=Mus musculus OX=10090 GN=Atg4b PE=1 SV=2	autophagy related 4B cysteine peptidase	ATG4B	Cytoplasm	peptidase	0	0.001	7.713	5	1	3	1	1	393	44.3	5.07	63	1	0	2.08	1.446	0.080112	0.096659	65.6	67.2	81.8	154.9	139.8	81.2	129.4	83.1	97.1	277742	283065	340479	645010	584603	338963	551688	348400	404553
Q99J83	Autophagy protein 5 OS=Mus musculus OX=10090 GN=Atg5 PE=1 SV=1	autophagy related 5	ATG5	Cytoplasm	other	0	0	15.489	7	1	3	1	1	275	32.4	5.91	57	1	0	1.616	1.511	0.158497	0.237035	70.5	97.3	76.8	81	138.5	124.2	116.1	76.1	119.7	1.88882e+06	2.60658e+06	2.0717e+06	2.17021e+06	3.71323e+06	3.32662e+06	3.12302e+06	2.05312e+06	3.2219e+06
Q9D906	Ubiquitin-like modifier-activating enzyme ATG7 OS=Mus musculus OX=10090 GN=Atg7 PE=1 SV=1	autophagy related 7	ATG7	Cytoplasm	enzyme	0	0.016	3.259	3	1	1	1	1	698	77.5	6.4	0	1	0	1.463	1.076	0.455417	0.586066	113	81.3	69.9	119	146.2	65.7	139.2	87.5	78.2	1.34504e+06	969330	834159	1.42531e+06	1.7476e+06	783525	1.68451e+06	1.05411e+06	938155
Q68FE2	Autophagy-related protein 9A OS=Mus musculus OX=10090 GN=Atg9a PE=1 SV=1	autophagy related 9A	ATG9A	Cytoplasm	other	5	0.088	1.751	1	1	1	1	1	551	63.1	8.12	0	1	0	1.31	1.88	0.945798	0.649491	93.2	228.4	99.5		211.4	80.4		187		1.33312e+06	3.26636e+06	1.43459e+06		3.0288e+06	1.14953e+06		2.69183e+06
Q9CWJ9	Bifunctional purine biosynthesis protein PURH OS=Mus musculus OX=10090 GN=Atic PE=1 SV=2	5-aminoimidazole-4-carboxamide ribonucleotide formyltransferase/IMP cyclohydrolase	ATIC	Cytoplasm	enzyme	0	0	90.696	23	7	66	7	1	592	64.2	6.76	662	7	0	1.681	1.702	0.000969	0.06312	74.3	67.9	71.4	120	127.5	109.6	127.8	80	121.5	1.11483e+07	1.02921e+07	1.07491e+07	1.80158e+07	1.92448e+07	1.64826e+07	1.92143e+07	1.20407e+07	1.8243e+07
Q6PA06	Atlastin-2 OS=Mus musculus OX=10090 GN=Atl2 PE=1 SV=1	atlastin GTPase 2	ATL2	Cytoplasm	other	2	0	174.523	26	12	158	12	1	583	66.2	5.43	1234	12	0	1.191	1.102	0.097156	0.763742	91.2	77.9	106.7	108.6	117.4	107.4	117.4	100.5	72.8	3.0679e+07	2.61799e+07	3.57821e+07	3.65695e+07	3.93743e+07	3.59853e+07	3.95953e+07	3.39518e+07	2.45099e+07
Q91YH5	Atlastin-3 OS=Mus musculus OX=10090 GN=Atl3 PE=1 SV=1	atlastin GTPase 3	ATL3	Cytoplasm	other	2	0	235.657	45	16	296	16	1	541	60.5	6.1	3374	16	0	1.141	1.112	0.594322	0.7239	98.1	63.4	119.9	111.9	85.5	117.2	109.1	79.1	115.9	8.12339e+07	5.247e+07	9.92762e+07	9.26665e+07	7.11617e+07	9.70706e+07	9.03038e+07	6.54779e+07	9.596e+07
O08997	Copper transport protein ATOX1 OS=Mus musculus OX=10090 GN=Atox1 PE=1 SV=1	antioxidant 1 copper chaperone	ATOX1	Cytoplasm	transporter	0	0	38.616	47	3	22	3	1	68	7.3	6.51	413	3	0	1.77	1.346	0.172292	0.539609	108.6	56.7	75.9	160.4	82.8	134.3	102.1	68.2	111.1	1.96533e+07	1.06466e+07	1.37578e+07	2.87831e+07	1.48773e+07	2.4462e+07	1.84296e+07	1.28756e+07	1.99474e+07
P98197	Probable phospholipid-transporting ATPase IH OS=Mus musculus OX=10090 GN=Atp11a PE=1 SV=1	ATPase phospholipid transporting 11A	ATP11A	Plasma Membrane	transporter	7	0	1249.29	50	62	3197	59	1	1187	135.4	6.48	49112	62	3	0.615	0.607	0.00237	0.187165	132.8	137.6	115	80.5	81.7	81.6	80.6	134.1	56.1	4.62336e+09	4.78855e+09	4.00457e+09	2.80321e+09	2.84478e+09	2.83954e+09	2.80724e+09	4.66766e+09	1.95407e+09
Q9QZW0	Phospholipid-transporting ATPase 11C OS=Mus musculus OX=10090 GN=Atp11c PE=1 SV=2	ATPase phospholipid transporting 11C	ATP11C	Plasma Membrane	transporter	8	0	236.065	20	17	301	14	1	1129	129.2	7.3	7688	17	0	1.1	1.198	0.400631	0.050717	97.3	90.8	92.1	111.2	101.3	87.7	110.4	111.2	97.9	8.49627e+07	7.92565e+07	8.04218e+07	9.71589e+07	8.85732e+07	7.67289e+07	9.6377e+07	9.70972e+07	8.55069e+07
Q9EPE9	Manganese-transporting ATPase 13A1 OS=Mus musculus OX=10090 GN=Atp13a1 PE=1 SV=2	ATPase 13A1	ATP13A1	Extracellular Space	transporter	6	0	241.144	22	17	226	17	1	1200	132.3	8.03	1907	17	0	0.886	0.909	0.618407	0.808894	93.6	92.1	94.9	82.9	164.1	78.6	85.1	132.2	76.7	4.06224e+07	4.07297e+07	4.1213e+07	3.59825e+07	7.11293e+07	3.40792e+07	3.76442e+07	5.81145e+07	3.33427e+07
Q5XF89	Probable cation-transporting ATPase 13A3 OS=Mus musculus OX=10090 GN=Atp13a3 PE=1 SV=1	ATPase 13A3	ATP13A3	Extracellular Space	transporter	10	0	182.719	20	16	160	16	1	1219	137.4	6.67	1463	16	0	0.704	1.029	0.00852	0.463022	130.6	111.5	113.6	82.9	61.3	80.1	123	116.9	79.9	5.33305e+07	4.62249e+07	4.63866e+07	3.3862e+07	2.51673e+07	3.27856e+07	5.02158e+07	4.79499e+07	3.28338e+07
Q8VDN2	Sodium/potassium-transporting ATPase subunit alpha-1 OS=Mus musculus OX=10090 GN=Atp1a1 PE=1 SV=1	ATPase Na+/K+ transporting subunit alpha 1	ATP1A1	Plasma Membrane	transporter	10	0	2975.28	66	96	19042	69	1	1023	112.9	5.45	397170	96	50	1.183	1.173	0.210961	0.036102	94.7	91.6	81	108.4	110.2	86.9	107.5	101.5	118.4	4.32806e+10	4.1889e+10	3.70238e+10	4.95375e+10	5.03709e+10	3.97316e+10	4.91365e+10	4.63984e+10	5.41025e+10
Q6PIE5	Sodium/potassium-transporting ATPase subunit alpha-2 OS=Mus musculus OX=10090 GN=Atp1a2 PE=1 SV=1	ATPase Na+/K+ transporting subunit alpha 2	ATP1A2	Plasma Membrane	transporter	8	0	953.159	34	34	7366	9	1	1020	112.1	5.55	151826	34	2	1.139	1.392	0.400761	0.092642	94	78.7	86.1	129.4	98.1	76.4	126.7	90.7	119.9	1.64005e+08	1.37331e+08	1.51504e+08	2.29376e+08	1.70882e+08	1.33518e+08	2.27705e+08	1.59877e+08	2.09144e+08
Q6PIC6	Sodium/potassium-transporting ATPase subunit alpha-3 OS=Mus musculus OX=10090 GN=Atp1a3 PE=1 SV=1	ATPase Na+/K+ transporting subunit alpha 3	ATP1A3	Plasma Membrane	transporter	8	0	942.056	32	32	6762	7	1	1013	111.6	5.41	150690	32	0	1.339	1.118	0.572892	0.87264	68.8	135.8	51	92	234.8	44.3	76.9	135.4	60.9	2.83653e+07	5.56558e+07	2.09023e+07	3.8306e+07	9.61969e+07	1.83262e+07	3.1687e+07	5.547e+07	2.56485e+07
Q9WV27	Sodium/potassium-transporting ATPase subunit alpha-4 OS=Mus musculus OX=10090 GN=Atp1a4 PE=1 SV=3	ATPase Na+/K+ transporting subunit alpha 4	ATP1A4	Plasma Membrane	transporter	10	0	626.279	14	19	4970	3	1	1032	114.8	5.71	90251	19	0	Present in 4h only								900									3.43559e+06
P14094	Sodium/potassium-transporting ATPase subunit beta-1 OS=Mus musculus OX=10090 GN=Atp1b1 PE=1 SV=1	ATPase Na+/K+ transporting subunit beta 1	ATP1B1	Plasma Membrane	transporter	1	0	1048.13	63	36	3432	36	1	304	35.2	8.65	52629	36	0	1.097	1.337	0.253966	0.134025	99.7	83.7	86	113	94.3	94.1	115	91.5	122.7	9.65307e+09	8.10606e+09	8.32863e+09	1.09312e+10	9.12341e+09	9.11339e+09	1.11262e+10	8.85283e+09	1.18776e+10
P14231	Sodium/potassium-transporting ATPase subunit beta-2 OS=Mus musculus OX=10090 GN=Atp1b2 PE=1 SV=2	ATPase Na+/K+ transporting subunit beta 2	ATP1B2	Plasma Membrane	transporter	1	0	15.102	10	2	11	2	1	290	33.3	8.31	45	2	0	0.798	0.918	0.115318	0.482039	101.3	139.4	105	83.8	100.6	61.8	96.4	123.6	88.1	1.57953e+07	2.10631e+07	1.60029e+07	1.27505e+07	1.51972e+07	9.40627e+06	1.46423e+07	1.8898e+07	1.35011e+07
P97370	Sodium/potassium-transporting ATPase subunit beta-3 OS=Mus musculus OX=10090 GN=Atp1b3 PE=1 SV=1	ATPase Na+/K+ transporting subunit beta 3	ATP1B3	Plasma Membrane	transporter	1	0	124.444	50	11	287	11	1	278	31.8	8.51	3398	11	0	1.169	1.464	0.086068	0.040714	82.5	74.9	89.2	121.8	96.4	94.5	120.8	94.4	125.5	1.94302e+08	1.7643e+08	2.09983e+08	2.86723e+08	2.2714e+08	2.23287e+08	2.84488e+08	2.22298e+08	2.9549e+08
Q8R429	Sarcoplasmic/endoplasmic reticulum calcium ATPase 1 OS=Mus musculus OX=10090 GN=Atp2a1 PE=1 SV=1	ATPase sarcoplasmic/endoplasmic reticulum Ca2+ transporting 1	ATP2A1	Cytoplasm	transporter	7	0	124.995	13	10	234	2	1	994	109.4	5.22	3685	10	0	5.768	4.391	0.206042	0.0072	26.2	60.2	31.5	197.9	181.6	11.8	150.5	102	138.3	688621	1.30279e+06	585844	3.69297e+06	3.45632e+06	336229	2.80174e+06	1.92168e+06	2.59804e+06
O55143	Sarcoplasmic/endoplasmic reticulum calcium ATPase 2 OS=Mus musculus OX=10090 GN=Atp2a2 PE=1 SV=2	ATPase sarcoplasmic/endoplasmic reticulum Ca2+ transporting 2	ATP2A2	Cytoplasm	transporter	8	0	632.544	39	36	1123	28	1	1044	114.8	5.34	17030	36	9	1.128	1.104	0.316209	0.495343	95.7	95.2	92.3	120.6	107.3	88	105.1	110.9	85	5.82762e+08	5.78556e+08	5.61583e+08	7.33267e+08	6.53478e+08	5.36338e+08	6.3888e+08	6.73144e+08	5.1782e+08
G5E829	Plasma membrane calcium-transporting ATPase 1 OS=Mus musculus OX=10090 GN=Atp2b1 PE=1 SV=1	ATPase plasma membrane Ca2+ transporting 1	ATP2B1	Plasma Membrane	transporter	7	0	673.988	43	40	836	25	1	1220	134.7	5.91	13355	40	17	1.099	1.172	0.207107	0.084577	97.2	86.6	92.5	112.7	101.7	92.1	112.9	95.8	108.5	4.84305e+08	4.31216e+08	4.60778e+08	5.62297e+08	5.06592e+08	4.58695e+08	5.6337e+08	4.77263e+08	5.40275e+08
Q9R0K7	Plasma membrane calcium-transporting ATPase 2 OS=Mus musculus OX=10090 GN=Atp2b2 PE=1 SV=2	ATPase plasma membrane Ca2+ transporting 2	ATP2B2	Plasma Membrane	transporter	8	0	147.537	9	9	205	1	1	1198	132.5	5.96	4698	9	0	1.221	0.73	0.638339	0.467219	177.8	91.1	81.7	123.4	61.1	111.2	50.9	66.5	136.2	530690	273423	249624	375650	229408	330635	153214	203912	405117
Q6Q477	Plasma membrane calcium-transporting ATPase 4 OS=Mus musculus OX=10090 GN=Atp2b4 PE=1 SV=1	ATPase plasma membrane Ca2+ transporting 4	ATP2B4	Plasma Membrane	transporter	7	0	555.523	32	38	681	27	1	1205	133	6.13	8971	38	0	1.306	1.498	0.03739	0.060516	86	76	77.4	126.6	98.8	101	115.9	89.1	129.1	2.16893e+08	1.91503e+08	1.96032e+08	3.19437e+08	2.49268e+08	2.5437e+08	2.92438e+08	2.24486e+08	3.25246e+08
Q80XR2	Calcium-transporting ATPase type 2C member 1 OS=Mus musculus OX=10090 GN=Atp2c1 PE=1 SV=2	ATPase secretory pathway Ca2+ transporting 1	ATP2C1	Cytoplasm	transporter	8	0	29.274	8	4	13	4	1	918	100.2	6.83	101	4	0	1.034	1.341	0.383852	0.151173	48.9	106.7	83.8	86.6	161	81.7	116.5	112.4	102.5	5.81518e+06	1.27166e+07	9.97077e+06	1.06189e+07	1.92344e+07	9.72318e+06	1.38703e+07	1.33758e+07	1.22811e+07
Q64436	Potassium-transporting ATPase alpha chain 1 OS=Mus musculus OX=10090 GN=Atp4a PE=1 SV=3	ATPase H+/K+ transporting subunit alpha	ATP4A	Plasma Membrane	transporter	8	0	166.395	11	12	2208	6	1	1033	113.9	5.88	38526	12	0	1.203	1.57	0.25112	0.114608	72.7	83.3	70.9	87.4	115.4	74.8	114.1	95.3	186.1	7.35729e+06	8.43841e+06	7.40581e+06	9.93517e+06	1.3048e+07	8.26831e+06	1.45947e+07	1.09477e+07	1.83781e+07
P56382	ATP synthase subunit epsilon, mitochondrial OS=Mus musculus OX=10090 GN=Atp5f1e PE=1 SV=2	ATP synthase, H+ transporting, mitochondrial F1 complex, epsilon subunit	Atp5e	Cytoplasm	transporter	0	0.001	8.975	44	3	39	3	1	52	5.8	10.01	500	3	0	1.247	1.413	0.818194	0.598056	132	65.3	70.2	189.3	87.6	28.6	160.5	99.2	67.4	6.47074e+07	2.99497e+07	3.46997e+07	8.92291e+07	4.21497e+07	1.31358e+07	7.56669e+07	4.53983e+07	3.16333e+07
Q03265	ATP synthase subunit alpha, mitochondrial OS=Mus musculus OX=10090 GN=Atp5f1a PE=1 SV=1	ATP synthase F1 subunit alpha	ATP5F1A	Cytoplasm	transporter	0	0	638.327	66	37	1211	37	1	553	59.7	9.19	26028	37	0	1.216	1.1	0.553342	0.580103	77.9	85.4	117.1	108.1	103.8	93.3	93.9	87	133.4	9.84466e+08	1.07855e+09	1.47907e+09	1.36595e+09	1.3118e+09	1.17908e+09	1.18592e+09	1.10011e+09	1.6854e+09
P56480	ATP synthase subunit beta, mitochondrial OS=Mus musculus OX=10090 GN=Atp5f1b PE=1 SV=2	ATP synthase F1 subunit beta	ATP5F1B	Cytoplasm	transporter	0	0	543.355	71	24	713	24	1	529	56.3	5.34	11044	24	0	1.283	1.202	0.021164	0.171748	88	82.1	93.2	112.9	114.8	99.5	105.7	87	116.7	3.9856e+08	3.71641e+08	4.22469e+08	5.10776e+08	5.19549e+08	4.50489e+08	4.78036e+08	3.93559e+08	5.27775e+08
Q91VR2	ATP synthase subunit gamma, mitochondrial OS=Mus musculus OX=10090 GN=Atp5f1c PE=1 SV=1	ATP synthase F1 subunit gamma	ATP5F1C	Cytoplasm	transporter	0	0	58.203	20	5	65	5	1	298	32.9	9.01	1172	5	0	0.752	0.953	0.936985	0.956598	110.7	81	109.5	138.2	82.4	75	109.8	89.1	104.3	5.03764e+07	3.70906e+07	4.96906e+07	6.28217e+07	3.74742e+07	3.41214e+07	5.0235e+07	4.05801e+07	4.79757e+07
Q9D3D9	ATP synthase subunit delta, mitochondrial OS=Mus musculus OX=10090 GN=Atp5f1d PE=1 SV=1	ATP synthase F1 subunit delta	ATP5F1D	Cytoplasm	transporter	0	0	30.747	38	3	18	3	1	168	17.6	5.08	386	3	0	0.993	0.716	0.845559	0.820982	105.6	67.8	140.7	133.2	56.9	104.9	75.6	70.2	145.1	1.13146e+07	7.23729e+06	1.49783e+07	1.41997e+07	6.15834e+06	1.11766e+07	8.60913e+06	7.47744e+06	1.54561e+07
O35143	ATPase inhibitor, mitochondrial OS=Mus musculus OX=10090 GN=ATP5IF1 PE=1 SV=2	ATP synthase inhibitory factor subunit 1	ATP5IF1	Cytoplasm	transporter	0	0	14.637	25	2	13	2	1	106	12.2	9.64	15	2	0	0.836	0.873	0.765435	0.675152	126.4	106.3	74.1	156.7	88.9	87.5	136.9	92.8	30.5	1.39243e+06	1.16717e+06	808228	1.71158e+06	971316	974429	1.49455e+06	1.01269e+06	515491
Q06185	ATP synthase subunit e, mitochondrial OS=Mus musculus OX=10090 GN=Atp5me PE=1 SV=2	ATP synthase, H+ transporting, mitochondrial F1F0 complex, subunit E	Atp5k	Cytoplasm	transporter	0	0	100.069	68	8	390	8	1	71	8.2	9.35	6641	8	0	0.908	0.951	0.40337	0.786337	87.3	122.5	110.7	100.5	108.6	61.2	88.5	115.5	105.2	1.98687e+08	2.78361e+08	2.51488e+08	2.28623e+08	2.4683e+08	1.39223e+08	2.01051e+08	2.62765e+08	2.39074e+08
Q78IK2	Up-regulated during skeletal muscle growth protein 5 OS=Mus musculus OX=10090 GN=Usmg5 PE=1 SV=1	ATP synthase membrane subunit DAPIT	ATP5MD	Cytoplasm	transporter	1	0	52.746	45	4	129	4	1	58	6.4	9.83	3331	4	0	0.967	0.884	0.3115	0.718141	92.9	83.3	176.9	89.8	50.7	97.7	76.2	82.1	150.5	7.18313e+07	6.44796e+07	1.37047e+08	6.95802e+07	3.92038e+07	7.56613e+07	5.89235e+07	6.34943e+07	1.1644e+08
P56135	ATP synthase subunit f, mitochondrial OS=Mus musculus OX=10090 GN=Atp5j2 PE=1 SV=3	ATP synthase membrane subunit f	ATP5MF	Cytoplasm	transporter	1	0	44.315	38	4	293	4	1	88	10.3	9.95	4141	4	0	0.906	0.977	0.230162	0.787672	86.1	98.1	158.2	90.9	88.9	57.3	95.8	93.8	130.9	2.88343e+08	3.30641e+08	5.30387e+08	3.05236e+08	2.9783e+08	1.99757e+08	3.21032e+08	3.21295e+08	4.38218e+08
Q9CPQ8	ATP synthase subunit g, mitochondrial OS=Mus musculus OX=10090 GN=Atp5l PE=1 SV=1	ATP synthase membrane subunit g	ATP5MG	Cytoplasm	transporter	0	0	138.31	53	6	305	6	1	103	11.4	9.74	3479	6	0	0.95	1.006	0.366769	0.929954	94.9	70.4	171.5	90.9	56.8	90.1	95.5	70.8	159.2	1.7525e+08	1.2994e+08	3.16998e+08	1.6797e+08	1.04893e+08	1.66667e+08	1.76286e+08	1.31221e+08	2.94557e+08
P56379	6.8 kDa mitochondrial proteolipid OS=Mus musculus OX=10090 GN=Mp68 PE=1 SV=1	ATP synthase membrane subunit 6.8PL	ATP5MPL	Cytoplasm	transporter	1	0.001	9.103	34	2	22	2	1	58	6.7	9.99	160	2	0	0.826	0.932	0.246591	0.749913	94.5	81.4	181.7	78.1	55.1	89.8	88	85	146.4	3.05019e+07	2.61671e+07	5.84785e+07	2.57836e+07	1.7758e+07	2.89964e+07	2.85663e+07	2.74262e+07	4.72648e+07
Q9CQQ7	ATP synthase F(0) complex subunit B1, mitochondrial OS=Mus musculus OX=10090 GN=Atp5f1 PE=1 SV=1	ATP synthase peripheral stalk-membrane subunit b	ATP5PB	Cytoplasm	transporter	0	0	250.572	46	16	607	16	1	256	28.9	9.06	7266	16	0	0.804	0.99	0.342393	0.601637	96.5	96.1	138.4	116.6	77.7	73.2	86.2	95.6	119.9	6.96015e+08	6.93297e+08	9.97406e+08	8.41164e+08	5.60795e+08	5.26516e+08	6.21951e+08	6.89843e+08	8.6356e+08
Q9DCX2	ATP synthase subunit d, mitochondrial OS=Mus musculus OX=10090 GN=Atp5h PE=1 SV=3	ATP synthase peripheral stalk subunit d	ATP5PD	Cytoplasm	transporter	0	0	295.836	90	15	1059	15	1	161	18.7	5.69	12794	15	0	0.809	0.967	0.284869	0.644631	100.1	91.8	138.4	109.5	81	72.4	94.9	96.8	115.1	7.93019e+08	7.2754e+08	1.09627e+09	8.67666e+08	6.41459e+08	5.73187e+08	7.52713e+08	7.67013e+08	9.11836e+08
P97450	ATP synthase-coupling factor 6, mitochondrial OS=Mus musculus OX=10090 GN=Atp5j PE=1 SV=1	ATP synthase peripheral stalk subunit F6	ATP5PF	Cytoplasm	transporter	0	0	17.607	44	2	5	2	1	108	12.5	9.36	41	2	0	0.25	0.802	0.123264	0.586723	72.3	133.2	249.3	83.3	9	33.3	9.4	106.9	203.3	3.00459e+06	5.51216e+06	1.03521e+07	3.44436e+06	458629	2.14691e+06	776935	4.46588e+06	8.4666e+06
Q9DB20	ATP synthase subunit O, mitochondrial OS=Mus musculus OX=10090 GN=Atp5o PE=1 SV=1	ATP synthase peripheral stalk subunit OSCP	ATP5PO	Cytoplasm	transporter	0	0	386.198	77	18	663	18	1	213	23.3	9.99	15135	18	0	0.962	0.952	0.612974	0.530517	117.7	114.5	92.2	125.3	110.2	47.7	112.6	108.9	70.9	6.88213e+08	6.69523e+08	5.38617e+08	7.31899e+08	6.43858e+08	2.78988e+08	6.57612e+08	6.36288e+08	4.14476e+08
Q9R1Q9	V-type proton ATPase subunit S1 OS=Mus musculus OX=10090 GN=Atp6ap1 PE=1 SV=1	ATPase H+ transporting accessory protein 1	ATP6AP1	Cytoplasm	transporter	2	0.047	2.187	2	1	14	1	1	463	51	5.92	132	1	0	0.69	0.78	0.337282	0.367844	155	74.5	134.9	93	40.9	120.6	105.2	68.1	107.8	2.32993e+07	1.09492e+07	2.01795e+07	1.36416e+07	6.12712e+06	1.80637e+07	1.54429e+07	1.0231e+07	1.62756e+07
Q9Z1G4	V-type proton ATPase 116 kDa subunit a isoform 1 OS=Mus musculus OX=10090 GN=Atp6v0a1 PE=1 SV=3	ATPase H+ transporting V0 subunit a1	ATP6V0A1	Cytoplasm	transporter	6	0	516.554	34	28	832	27	1	839	96.4	6.76	12350	28	0	0.927	0.97	0.341745	0.505049	122.4	108.8	91.5	100.9	75.7	104.8	105.6	108.3	81.9	6.15314e+08	5.47283e+08	4.59655e+08	5.06411e+08	3.80179e+08	5.26904e+08	5.30966e+08	5.43303e+08	4.10518e+08
P15920	V-type proton ATPase 116 kDa subunit a isoform 2 OS=Mus musculus OX=10090 GN=Atp6v0a2 PE=1 SV=2	ATPase H+ transporting V0 subunit a2	ATP6V0A2	Cytoplasm	transporter	6	0	98.043	17	11	72	11	1	856	98.1	6.64	1201	11	0	0.85	0.883	0.51334	0.927569	109.8	72.5	127.3	93.2	85.7	95.4	135.4	97	83.7	2.98011e+07	1.97309e+07	3.45532e+07	2.53813e+07	2.34627e+07	2.60816e+07	3.67834e+07	2.65375e+07	2.31261e+07
Q920R6	V-type proton ATPase 116 kDa subunit a isoform 4 OS=Mus musculus OX=10090 GN=Atp6v0a4 PE=1 SV=1	ATPase H+ transporting V0 subunit a4	ATP6V0A4	Cytoplasm	transporter	6	0	1055.84	45	41	2391	40	1	833	95.5	6.35	40580	41	1	0.843	0.958	0.177044	0.577622	126.7	106.8	97.8	104.8	62.1	90	115.9	102.4	93.5	4.10361e+09	3.46345e+09	3.16885e+09	3.39711e+09	2.0125e+09	2.91751e+09	3.75627e+09	3.31647e+09	3.03074e+09
P63082	V-type proton ATPase 16 kDa proteolipid subunit OS=Mus musculus OX=10090 GN=Atp6v0c PE=1 SV=1	ATPase H+ transporting V0 subunit c	ATP6V0C	Cytoplasm	transporter	4	0	65.86	32	2	99	2	1	155	15.8	9.13	843	2	0	0.755	0.795	0.475393	0.680746	224.9	22.9	132.4	100	23	105.7	149.6	36.2	105.3	2.82429e+07	3.34141e+06	1.68662e+07	1.24693e+07	3.40001e+06	1.32435e+07	1.86118e+07	4.66267e+06	1.30973e+07
P51863	V-type proton ATPase subunit d 1 OS=Mus musculus OX=10090 GN=Atp6v0d1 PE=1 SV=2	ATPase H+ transporting V0 subunit d1	ATP6V0D1	Cytoplasm	transporter	0	0	372.081	60	21	917	21	1	351	40.3	5	16489	21	0	0.77	0.915	0.549953	0.245647	96.6	112.4	111	85.4	82.7	124	84	102.5	101.5	1.37395e+09	1.59861e+09	1.57941e+09	1.21525e+09	1.17636e+09	1.76467e+09	1.19465e+09	1.45947e+09	1.44467e+09
Q80SY3	V-type proton ATPase subunit d 2 OS=Mus musculus OX=10090 GN=Atp6v0d2 PE=2 SV=2	ATPase H+ transporting V0 subunit d2	ATP6V0D2	Cytoplasm	transporter	0	0	371.397	68	17	418	17	1	350	40.5	5.25	7763	17	0	1.551	0.926	0.296852	0.593576	47.3	77.3	110.6	69.8	119.9	160.3	54.8	71.6	188.4	1.48042e+08	2.42312e+08	3.4636e+08	2.19041e+08	3.75535e+08	5.0197e+08	1.71573e+08	2.23989e+08	5.89588e+08
P50516	V-type proton ATPase catalytic subunit A OS=Mus musculus OX=10090 GN=Atp6v1a PE=1 SV=2	ATPase H+ transporting V1 subunit A	ATP6V1A	Plasma Membrane	transporter	0	0	1410.19	92	52	3659	52	1	617	68.3	5.58	66880	52	0	0.866	0.936	0.409644	0.441338	108	120.9	91.2	93.5	86	109.9	101.1	107.6	81.7	4.07973e+09	4.56569e+09	3.44295e+09	3.53175e+09	3.24854e+09	4.1494e+09	3.81667e+09	4.06458e+09	3.08462e+09
P62814	V-type proton ATPase subunit B, brain isoform OS=Mus musculus OX=10090 GN=Atp6v1b2 PE=1 SV=1	ATPase H+ transporting V1 subunit B2	ATP6V1B2	Cytoplasm	transporter	0	0	1233.04	91	41	3456	41	1	511	56.5	5.81	61724	41	0	0.908	0.959	0.452986	0.575616	106.4	126.9	86.2	96.5	90	102.4	102	111.2	78.4	2.97368e+09	3.54794e+09	2.41024e+09	2.70049e+09	2.51612e+09	2.86292e+09	2.85744e+09	3.10799e+09	2.19277e+09
Q9Z1G3	V-type proton ATPase subunit C 1 OS=Mus musculus OX=10090 GN=Atp6v1c1 PE=1 SV=4	ATPase H+ transporting V1 subunit C1	ATP6V1C1	Cytoplasm	transporter	0	0	324.768	59	21	459	21	1	382	43.9	7.46	8521	21	0	0.914	0.892	0.427099	0.372389	138.8	114.9	84.9	111.6	65.9	105.1	107.7	102.6	68.5	5.21548e+08	4.32132e+08	3.18481e+08	4.19196e+08	2.47477e+08	3.93829e+08	4.04124e+08	3.84338e+08	2.57634e+08
Q99L60	V-type proton ATPase subunit C 2 OS=Mus musculus OX=10090 GN=Atp6v1c2 PE=1 SV=1	ATPase H+ transporting V1 subunit C2	ATP6V1C2	Cytoplasm	transporter	0	0	139.416	31	14	173	14	1	427	48.3	6.76	2732	14	0	0.891	1.041	0.131066	0.551972	104	110.9	102.3	104.6	87.3	92.6	108.3	80.6	109.3	1.2674e+08	1.35261e+08	1.24793e+08	1.27556e+08	1.06352e+08	1.13011e+08	1.32075e+08	9.84351e+07	1.3325e+08
P57746	V-type proton ATPase subunit D OS=Mus musculus OX=10090 GN=Atp6v1d PE=1 SV=1	ATPase H+ transporting V1 subunit D	ATP6V1D	Cytoplasm	transporter	0	0	239.325	56	14	416	14	1	247	28.4	9.45	7970	14	0	0.885	0.775	0.439624	0.305037	117.5	123	86.4	104	78.2	107.1	103.4	91	89.4	6.91109e+08	7.23456e+08	5.08786e+08	6.127e+08	4.59841e+08	6.29853e+08	6.09044e+08	5.35421e+08	5.25971e+08
P50518	V-type proton ATPase subunit E 1 OS=Mus musculus OX=10090 GN=Atp6v1e1 PE=1 SV=2	ATPase H+ transporting V1 subunit E1	ATP6V1E1	Cytoplasm	transporter	0	0	343.948	61	22	1042	22	1	226	26.1	8.43	19810	22	0	0.962	0.825	0.383318	0.521298	113.4	110.3	97.2	106	67.4	106.7	118	91	89.9	9.84418e+08	9.58442e+08	8.43632e+08	9.22533e+08	5.85681e+08	9.25877e+08	1.02398e+09	7.89102e+08	7.79145e+08
Q9D1K2	V-type proton ATPase subunit F OS=Mus musculus OX=10090 GN=Atp6v1f PE=1 SV=2	ATPase H+ transporting V1 subunit F	ATP6V1F	Cytoplasm	transporter	0	0	140.312	90	9	211	9	1	119	13.4	5.82	3183	9	0	0.922	0.876	0.599012	0.113044	107.2	122.4	98.3	98.9	68.8	128.4	99.3	93.9	82.8	1.09999e+08	1.24849e+08	1.00274e+08	1.00918e+08	7.0367e+07	1.3102e+08	1.01365e+08	9.59001e+07	8.45437e+07
Q9CR51	V-type proton ATPase subunit G 1 OS=Mus musculus OX=10090 GN=Atp6v1g1 PE=1 SV=3	ATPase H+ transporting V1 subunit G1	ATP6V1G1	Cytoplasm	transporter	0	0	197.275	64	9	270	9	1	118	13.7	7.97	5195	9	0	0.872	0.711	0.606757	0.173727	125.6	128.5	84.7	109.5	71.8	122.7	89.3	98.2	69.7	2.52608e+08	2.61934e+08	1.70282e+08	2.19968e+08	1.45185e+08	2.48057e+08	1.79573e+08	1.97938e+08	1.40018e+08
Q8BMC1	V-type proton ATPase subunit G 3 OS=Mus musculus OX=10090 GN=Atp6v1g3 PE=1 SV=1	ATPase H+ transporting V1 subunit G3	ATP6V1G3	Cytoplasm	transporter	0	0	101.347	51	6	151	6	1	118	13.7	8.97	2208	6	0	1.075	1.027	0.972455	0.75749	138.9	93.8	73.4	132.5	75.6	100.8	109.6	79.1	96.3	7.58273e+07	5.15286e+07	4.02405e+07	7.25114e+07	4.17932e+07	5.51524e+07	5.97802e+07	4.38597e+07	5.29285e+07
Q8BVE3	V-type proton ATPase subunit H OS=Mus musculus OX=10090 GN=Atp6v1h PE=1 SV=1	ATPase H+ transporting V1 subunit H	ATP6V1H	Cytoplasm	transporter	0	0	681.761	62	30	1571	30	1	483	55.8	6.61	22314	30	0	0.719	0.854	0.170497	0.462805	120.3	124	88.7	100.4	84.7	86.6	102.8	114.4	78.1	1.6424e+09	1.69419e+09	1.21104e+09	1.37067e+09	1.15559e+09	1.18168e+09	1.40304e+09	1.56286e+09	1.06563e+09
Q64430	Copper-transporting ATPase 1 OS=Mus musculus OX=10090 GN=Atp7a PE=1 SV=3	ATPase copper transporting alpha	ATP7A	Plasma Membrane	transporter	7	0	76.355	8	8	70	8	1	1491	161.9	6.62	468	8	0	0.984	1.093	0.581124	0.081067	100	94.9	86.3	115.7	93.3	88.8	115.2	102.2	103.7	2.84186e+07	2.69455e+07	2.45039e+07	3.31596e+07	2.65622e+07	2.52165e+07	3.2802e+07	2.90245e+07	2.94448e+07
P70704	Phospholipid-transporting ATPase IA OS=Mus musculus OX=10090 GN=Atp8a1 PE=1 SV=2	ATPase phospholipid transporting 8A1	ATP8A1	Cytoplasm	transporter	8	0	101.415	12	10	97	10	1	1164	131.3	6.84	601	10	0	1.45	1.515	0.000562	0.019279	75.7	74.2	82.9	115.9	109.5	109.7	122.6	94.7	114.7	2.26205e+07	2.21658e+07	2.49359e+07	3.46178e+07	3.26875e+07	3.27616e+07	3.67088e+07	2.82574e+07	3.47321e+07
O70228	Probable phospholipid-transporting ATPase IIA OS=Mus musculus OX=10090 GN=Atp9a PE=1 SV=3	ATPase phospholipid transporting 9A (putative)	ATP9A	Cytoplasm	transporter	10	0	142.987	17	16	172	13	1	1047	118.5	7.69	2816	16	3	0.751	0.877	0.045363	0.269053	106.3	136.8	111.4	76.3	97.4	83.6	97.7	120.2	70.2	9.44754e+07	1.21446e+08	9.88716e+07	6.87878e+07	8.65427e+07	7.42897e+07	8.76192e+07	1.07018e+08	6.26379e+07
P98195	Probable phospholipid-transporting ATPase IIB OS=Mus musculus OX=10090 GN=Atp9b PE=1 SV=4	ATPase phospholipid transporting 9B (putative)	ATP9B	Cytoplasm	transporter	10	0	127.974	17	14	119	11	1	1146	128.9	7.64	2144	14	0	0.766	0.93	0.015012	0.206507	111.8	123.7	107	95.7	85.6	81.7	110.7	104	79.7	1.3191e+08	1.45865e+08	1.26218e+08	1.1289e+08	1.01466e+08	9.65621e+07	1.30757e+08	1.22732e+08	9.40815e+07
Q9WU60	Attractin OS=Mus musculus OX=10090 GN=Atrn PE=1 SV=3	attractin	ATRN	Extracellular Space	other	1	0.001	6.695	1	1	16	1	1	1428	158	7.27	143	1	0	1.038	1.328	0.817967	0.295795	91	47.5	127.3	86.9	101.8	94.4	106.6	123.6	120.9	1.49798e+06	785398	2.08041e+06	1.4239e+06	1.69291e+06	1.56465e+06	1.7433e+06	2.02213e+06	1.97448e+06
P54254	Ataxin-1 OS=Mus musculus OX=10090 GN=Atxn1 PE=1 SV=2	ataxin 1	ATXN1	Nucleus	transcription regulator	0	0.032	2.556	4	1	3	1	1	791	83.7	8.16	0	1	0
Q9JLZ3	Methylglutaconyl-CoA hydratase, mitochondrial OS=Mus musculus OX=10090 GN=Auh PE=1 SV=1	AU RNA binding methylglutaconyl-CoA hydratase	AUH	Cytoplasm	enzyme	0	0	33.526	15	4	56	4	1	314	33.4	9.51	818	4	0	0.845	0.857	0.186885	0.352945	114.7	136.8	92.7	97.8	96.9	86.2	98.2	118.9	57.8	3.7717e+07	4.49883e+07	3.04361e+07	3.2115e+07	3.18199e+07	2.83335e+07	3.22465e+07	3.91209e+07	1.91591e+07
P70295	Ancient ubiquitous protein 1 OS=Mus musculus OX=10090 GN=Aup1 PE=1 SV=1	AUP1 lipid droplet regulating VLDL assembly factor	AUP1	Cytoplasm	other	1	0	147.614	28	6	72	6	1	410	46.1	8.4	613	6	0	0.986	1.112	0.566641	0.970782	96.5	98	90.6	95.2	153.7	78.9	107.3	117.5	62.3	3.81003e+07	3.86081e+07	3.57391e+07	3.75541e+07	6.0551e+07	3.11247e+07	4.22959e+07	4.63648e+07	2.45749e+07
Q00993	Tyrosine-protein kinase receptor UFO OS=Mus musculus OX=10090 GN=Axl PE=1 SV=2	AXL receptor tyrosine kinase	AXL	Plasma Membrane	kinase	1	0	16.188	4	3	13	2	1	888	98.1	5.74	41	3	0	1.163	1.815	0.336675	0.069559	74.9	66.9	96.6	80.6	120.4	87.1	144.6	92.9	135.9	1.18002e+06	1.0577e+06	1.53713e+06	1.2709e+06	2.04508e+06	1.37973e+06	2.2861e+06	1.47199e+06	2.16078e+06
Q9QYP6	5-azacytidine-induced protein 2 OS=Mus musculus OX=10090 GN=Azi2 PE=1 SV=1	5-azacytidine induced 2	AZI2	Cytoplasm	other	0	0.062	2.003	4	1	2	1	1	405	46.1	6.7	0	1	0	present in sham only	0.608		0.697603		376.1					390.1		133.8		172970					179447		61538.5
P01887	Beta-2-microglobulin OS=Mus musculus OX=10090 GN=B2m PE=1 SV=2	beta-2-microglobulin	B2M	Plasma Membrane	transmembrane receptor	1	0	25.016	47	4	51	4	1	119	13.8	8.44	926	4	0	1.332	1.23	0.177574	0.566041	69	78.8	108.1	99.6	105	154.5	97	76.4	111.7	8.40225e+07	9.60389e+07	1.31628e+08	1.21422e+08	1.27949e+08	1.8818e+08	1.18181e+08	9.30956e+07	1.36105e+08
P58158	Galactosylgalactosylxylosylprotein 3-beta-glucuronosyltransferase 3 OS=Mus musculus OX=10090 GN=B3gat3 PE=1 SV=1	beta-1,3-glucuronyltransferase 3	B3GAT3	Cytoplasm	enzyme	1	0	43.087	30	5	33	5	1	335	37	8.78	286	5	0	0.726	0.968	0.164959	0.700512	92.4	116.4	120.2	84.5	105	81.2	129.3	112.7	58.3	1.59726e+07	2.01319e+07	2.08157e+07	1.45956e+07	1.81595e+07	1.4217e+07	2.2351e+07	1.94753e+07	1.02355e+07
Q5JCS9	N-acetyllactosaminide beta-1,3-N-acetylglucosaminyltransferase 3 OS=Mus musculus OX=10090 GN=B3gnt3 PE=2 SV=1	UDP-GlcNAc:betaGal beta-1,3-N-acetylglucosaminyltransferase 3	B3GNT3	Cytoplasm	enzyme	1	0.041	2.316	8	1	4	1	1	372	42.6	8.79	0	1	0
P15535	Beta-1,4-galactosyltransferase 1 OS=Mus musculus OX=10090 GN=B4galt1 PE=1 SV=1	beta-1,4-galactosyltransferase 1	B4GALT1	Cytoplasm	enzyme	1	0	33.473	13	4	65	4	1	399	44.4	9.38	677	4	0	1.004	1.195	0.990036	0.143665	92.5	81.8	108.3	105.8	83.6	92.8	122.5	102.3	110.5	1.07489e+07	9.5419e+06	1.26272e+07	1.23262e+07	9.72156e+06	1.07955e+07	1.425e+07	1.19849e+07	1.29023e+07
Q8K3W0	BRISC and BRCA1-A complex member 2 OS=Mus musculus OX=10090 GN=Babam2 PE=1 SV=2	BRISC and BRCA1 A complex member 2	BABAM2	Cytoplasm	other	0	0	19.101	11	3	14	3	1	383	43.5	5.94	47	3	0	1.098	1.054	0.234489	0.340105	108.8	36.3	94	103.3	137.3	102.9	99.1	124.6	93.6	8.79223e+06	4.10172e+06	7.59332e+06	8.33697e+06	1.10821e+07	8.30602e+06	8.03471e+06	1.00814e+07	7.60035e+06
Q91YN9	BAG family molecular chaperone regulator 2 OS=Mus musculus OX=10090 GN=Bag2 PE=1 SV=1	BCL2 associated athanogene 2	BAG2	Cytoplasm	other	0	0.041	2.324	13	1	1	1	1	210	23.5	6.42	0	1	0	1.045	1.33	0.736061	0.565679	84.8	70.9	109.1	157.1	88.7	54	173.4	49.1	112.8	102626	86400.2	131140	195233	107764	67666.3	222152	62525.8	136006
Q9JLV1	BAG family molecular chaperone regulator 3 OS=Mus musculus OX=10090 GN=Bag3 PE=1 SV=2	BCL2 associated athanogene 3	BAG3	Cytoplasm	other	0	0	15.489	2	1	20	1	1	577	61.8	7.27	723	1	0	1.484	2.204	0.265202	0.08554	52.5	66.8	86.3	99.1	63.1	111.1	147.2	85.2	188.6	595815	761904	976489	1.12312e+06	714943	1.26813e+06	1.67874e+06	963997	2.14763e+06
Q8CI32	BAG family molecular chaperone regulator 5 OS=Mus musculus OX=10090 GN=Bag5 PE=1 SV=1	BCL2 associated athanogene 5	BAG5	Cytoplasm	other	0	0.032	2.54	6	1	4	1	1	447	50.9	6.05	20	1	0	1.289	1.459	0.246221	0.52497	70.6	46.2	99.3	212.8	89.8	91	149	38.4	102.9	56804.2	35576.8	87866.6	164831	72735.1	69573.4	114772	29375.6	79105.3
Q9Z1R2	Large proline-rich protein BAG6 OS=Mus musculus OX=10090 GN=Bag6 PE=1 SV=1	BCL2 associated athanogene 6	BAG6	Nucleus	enzyme	0	0	111.263	12	9	70	9	1	1154	121	5.71	648	9	0	1.246	1.096	0.094804	0.147844	90.1	90.8	71.6	96.4	143.9	112.3	98.8	106.2	89.8	1.38063e+07	1.4019e+07	1.09948e+07	1.47983e+07	2.26758e+07	1.72637e+07	1.51286e+07	1.72409e+07	1.37702e+07
Q8BKX1	Brain-specific angiogenesis inhibitor 1-associated protein 2 OS=Mus musculus OX=10090 GN=Baiap2 PE=1 SV=2	BAR/IMD domain containing adaptor protein 2	BAIAP2	Plasma Membrane	kinase	0	0	358.564	54	24	610	24	1	535	59.2	9.04	9152	24	0	0.872	1.017	0.869374	0.494951	56.3	109.1	115.3	90.5	95.2	105.1	91.4	111	126.1	2.07007e+08	4.01684e+08	4.24518e+08	3.33498e+08	3.50208e+08	3.8659e+08	3.36125e+08	4.08083e+08	4.63695e+08
Q9DBJ3	Brain-specific angiogenesis inhibitor 1-associated protein 2-like protein 1 OS=Mus musculus OX=10090 GN=Baiap2l1 PE=1 SV=1	BAR/IMD domain containing adaptor protein 2 like 1	BAIAP2L1	Cytoplasm	other	0	0	192.313	55	21	268	21	1	514	57.2	8.75	2577	21	0	0.773	0.885	0.075069	0.819153	105	136.6	94.4	76.4	81.1	85.6	89	139.1	92.9	1.89162e+08	2.46637e+08	1.69499e+08	1.37581e+08	1.45745e+08	1.53706e+08	1.60979e+08	2.50238e+08	1.66895e+08
Q80Y61	Brain-specific angiogenesis inhibitor 1-associated protein 2-like protein 2 OS=Mus musculus OX=10090 GN=Baiap2l2 PE=1 SV=1	BAR/IMD domain containing adaptor protein 2 like 2	BAIAP2L2	Cytoplasm	other	0	0	125.366	20	6	88	6	1	522	58.4	9.5	1537	6	0	0.627	0.693	0.482719	0.949955	61.6	126.4	129.6	79.2	67.6	111.2	87.6	160.5	76.4	8.87884e+06	1.81379e+07	1.862e+07	1.18145e+07	1.01771e+07	1.59678e+07	1.31838e+07	2.30387e+07	1.10433e+07
O54962	Barrier-to-autointegration factor OS=Mus musculus OX=10090 GN=Banf1 PE=1 SV=1	barrier to autointegration factor 1	BANF1	Nucleus	other	0	0	27.447	45	3	15	3	1	89	10.1	6.09	75	3	0	13.942	6.603	0.02925	0.245672	3	9.3	70.9	110.9	206.5	129.2	61.2	51.8	257.4	68941.8	301328	1.64175e+06	2.58787e+06	4.72061e+06	2.94616e+06	1.39191e+06	1.24127e+06	5.85767e+06
Q91XV3	Brain acid soluble protein 1 OS=Mus musculus OX=10090 GN=Basp1 PE=1 SV=3	brain abundant membrane attached signal protein 1	BASP1	Nucleus	transcription regulator	0	0	58.722	34	3	25	3	1	226	22.1	4.51	751	3	0	0.382	0.4	0.38907	0.275509	135.2	26.5	377.5	51.7	20	147.3	71.1	16.5	54.1	2.99216e+06	1.01204e+06	8.47443e+06	1.67372e+06	753640	3.19755e+06	1.59698e+06	438763	1.69826e+06
Q07813	Apoptosis regulator BAX OS=Mus musculus OX=10090 GN=Bax PE=1 SV=1	BCL2 associated X, apoptosis regulator	BAX	Cytoplasm	transporter	1	0	28.394	14	2	5	2	1	192	21.4	4.98	205	2	0	1.283	1.081	0.261903	0.927631	113.8	81.7	79.9	97.9	152	104.8	117.5	88.3	64.1	4.5124e+06	3.44102e+06	3.02044e+06	3.71169e+06	5.79282e+06	4.02601e+06	4.44846e+06	3.33932e+06	2.42246e+06
Q9R069	Basal cell adhesion molecule OS=Mus musculus OX=10090 GN=Bcam PE=1 SV=1	basal cell adhesion molecule (Lutheran blood group)	BCAM	Plasma Membrane	transmembrane receptor	1	0	310.383	54	20	338	20	1	622	67.6	6.25	5941	20	0	1.187	1.161	0.169893	0.122836	83.1	103.3	89	105.7	105.8	97.2	112	103.4	100.5	1.78228e+08	2.21346e+08	1.91013e+08	2.26431e+08	2.27313e+08	2.08576e+08	2.3993e+08	2.2178e+08	2.15301e+08
Q61335	B-cell receptor-associated protein 31 OS=Mus musculus OX=10090 GN=Bcap31 PE=1 SV=4	B cell receptor associated protein 31	BCAP31	Cytoplasm	transporter	2	0	132.851	31	13	166	13	1	245	27.9	8.7	1836	13	0	1.033	0.861	0.678688	0.153447	103.1	89.7	113.2	129.6	88.3	106.5	92.3	88.4	88.8	9.69861e+07	8.45078e+07	1.06505e+08	1.22204e+08	8.32243e+07	1.00149e+08	8.68474e+07	8.32028e+07	8.35442e+07
Q61140	Breast cancer anti-estrogen resistance protein 1 OS=Mus musculus OX=10090 GN=Bcar1 PE=1 SV=2	BCAR1 scaffold protein, Cas family member	BCAR1	Plasma Membrane	enzyme	0	0	25.62	5	2	29	2	1	874	94.2	5.68	196	2	0	1.299	1.656	0.061544	0.049062	86.7	54.2	76.3	93.9	99.1	99.6	163.5	100.5	126.3	1.66597e+06	1.03651e+06	1.46105e+06	1.79726e+06	1.91842e+06	1.92458e+06	3.12736e+06	1.92448e+06	2.45168e+06
Q9QZK2	Breast cancer anti-estrogen resistance protein 3 OS=Mus musculus OX=10090 GN=Bcar3 PE=1 SV=1	BCAR3 adaptor protein, NSP family member	BCAR3	Cytoplasm	other	0	0.055	2.057	3	1	3	1	1	820	92.2	7.81	0	1	0	1.207	0.87	0.402439	0.940063	92.1	104.7	69	111.2	192.4	68.4	107.5	74.6	80.2	102180	115269	84859.1	121695	213190	74988.8	119306	96572.9	99095.6
Q8CCN5	Breast carcinoma-amplified sequence 3 homolog OS=Mus musculus OX=10090 GN=Bcas3 PE=1 SV=2	BCAS3 microtubule associated cell migration factor	BCAS3	Nucleus	other	0	0	23.003	3	2	17	2	1	928	101	6.7	186	2	0	0.784	0.73	0.50794	0.224507	80.5	114.7	157.1	89.9	127.5	76.2	94.6	75.6	83.8	330199	470291	643393	372093	522724	311991	396265	312253	342980
P24288	Branched-chain-amino-acid aminotransferase, cytosolic OS=Mus musculus OX=10090 GN=Bcat1 PE=1 SV=2	branched chain amino acid transaminase 1	BCAT1	Cytoplasm	enzyme	0	0.009	4.058	3	1	1	1	1	386	42.8	5.39	24	1	0	1.385	0.891	0.442653	0.726431	11.9	98	129.5	195.8	135.8	48.9	110	87.3	82.8	386994	3.19476e+06	4.21984e+06	6.3805e+06	4.42432e+06	2.6853e+06	3.5859e+06	2.8464e+06	2.69758e+06
O35855	Branched-chain-amino-acid aminotransferase, mitochondrial OS=Mus musculus OX=10090 GN=Bcat2 PE=1 SV=2	branched chain amino acid transaminase 2	BCAT2	Cytoplasm	enzyme	0	0	156.856	37	10	280	10	1	393	44.1	8.29	2629	10	0	0.828	0.72	0.50156	0.662046	125.8	119.2	79.9	108.6	98.7	81.3	85.9	139.4	61.2	1.15633e+09	1.09559e+09	7.35697e+08	9.97913e+08	9.09602e+08	7.47221e+08	7.92845e+08	1.29335e+09	5.67059e+08
P50136	2-oxoisovalerate dehydrogenase subunit alpha, mitochondrial OS=Mus musculus OX=10090 GN=Bckdha PE=1 SV=1	branched chain keto acid dehydrogenase E1 subunit alpha	BCKDHA	Cytoplasm	enzyme	0	0	107.445	23	7	78	7	1	442	50.3	8.06	1208	7	0	0.892	0.793	0.910923	0.653717	68.9	119.5	118.1	60.2	152.2	105.3	68.5	113.6	93.7	3.1425e+07	5.4292e+07	5.34364e+07	2.82923e+07	6.90622e+07	4.76986e+07	3.13382e+07	5.13925e+07	4.23633e+07
Q6P3A8	2-oxoisovalerate dehydrogenase subunit beta, mitochondrial OS=Mus musculus OX=10090 GN=Bckdhb PE=1 SV=2	branched chain keto acid dehydrogenase E1 subunit beta	BCKDHB	Cytoplasm	enzyme	0	0	24.409	12	3	6	3	1	390	42.9	6.7	106	3	0	1.3	1.142	0.304431	0.31084	48	79	69.3	69	301.7	90	79.1	99	65	3.38983e+06	5.55536e+06	4.89401e+06	4.87567e+06	2.12245e+07	6.34176e+06	5.56291e+06	6.97884e+06	4.58342e+06
P10417	Apoptosis regulator Bcl-2 OS=Mus musculus OX=10090 GN=Bcl2 PE=1 SV=3	BCL2 apoptosis regulator	BCL2	Cytoplasm	transporter	1	0.001	9.559	11	1	5	1	1	236	26.4	7.18	0	1	0	1.657	1.656	0.117374	0.041701	68.8	44.9	79.3	141.9	114	72.3	162.3	113.9	102.6	462410	301689	536338	964743	765130	485912	1.09534e+06	765290	696158
P59017	Bcl-2-like protein 13 OS=Mus musculus OX=10090 GN=Bcl2l13 PE=1 SV=2	BCL2 like 13	BCL2L13	Cytoplasm	other	1	0.001	5.911	6	1	6	1	1	434	46.7	4.59	0	1	0	0.81	0.877	0.885324	0.722038	104.9	86.3	120.5	151.2	85	62.4	92	127.1	70.6	521290	426715	599604	756816	429131	308450	458847	628878	349113
Q67FY2	B-cell CLL/lymphoma 9-like protein OS=Mus musculus OX=10090 GN=Bcl9l PE=1 SV=1	BCL9 like	BCL9L	Cytoplasm	other	0	0.061	2.014	3	1	3	1	1	1494	156.6	8.63	0	1	0
Q6PAJ1	Breakpoint cluster region protein OS=Mus musculus OX=10090 GN=Bcr PE=1 SV=3	BCR activator of RhoGEF and GTPase	BCR	Cytoplasm	kinase	0	0	12.153	3	2	16	2	1	1270	143	6.92	151	2	0	1.051	0.876	0.699273	0.595145	51.4	154.2	94.9	74.9	180	99.8	59.4	102.2	83.1	1.51431e+06	4.5134e+06	2.78111e+06	2.18914e+06	5.27376e+06	2.92582e+06	1.74315e+06	2.98532e+06	2.44409e+06
Q9CZP5	Mitochondrial chaperone BCS1 OS=Mus musculus OX=10090 GN=Bcs1l PE=1 SV=1	BCS1 homolog, ubiquinol-cytochrome c reductase complex chaperone	BCS1L	Cytoplasm	other	0	0.011	3.838	5	1	1	1	1	418	47.4	7.93	0	1	0	1.232	1.23	0.645744	0.478401	82.7	31.4	143	95.7	107.9	101.8	99.9	101.7	135.9	327236	124218	593541	370304	417452	397397	394621	398036	540029
Q80XN0	D-beta-hydroxybutyrate dehydrogenase, mitochondrial OS=Mus musculus OX=10090 GN=Bdh1 PE=1 SV=2	3-hydroxybutyrate dehydrogenase 1	BDH1	Cytoplasm	enzyme	0	0	406.929	57	21	672	21	1	343	38.3	9.01	11051	21	0	1.131	1.207	0.954581	0.80735	76.2	85.8	132.3	105.3	95.2	97	96.4	103.5	108.2	4.40547e+08	4.95477e+08	7.64807e+08	6.08373e+08	5.50744e+08	5.61216e+08	5.57489e+08	5.99888e+08	6.25894e+08
Q8JZV9	3-hydroxybutyrate dehydrogenase type 2 OS=Mus musculus OX=10090 GN=Bdh2 PE=1 SV=1	3-hydroxybutyrate dehydrogenase 2	BDH2	Cytoplasm	enzyme	0	0	121.959	44	11	232	11	1	245	26.7	7.99	7448	11	0	1.343	1.233	0.287867	0.469489	113.3	81.9	77.8	118.5	93.7	109.9	114.4	89.5	101	2.62136e+08	1.89024e+08	1.79937e+08	2.73533e+08	2.17175e+08	2.5371e+08	2.64101e+08	2.07077e+08	2.33027e+08
O35623	BET1 homolog OS=Mus musculus OX=10090 GN=Bet1 PE=1 SV=1	Bet1 golgi vesicular membrane trafficking protein	BET1	Cytoplasm	transporter	1	0.016	3.142	9	1	2	1	1	118	13.3	9.07	16	1	0	1.185	1.463	0.555636	0.883944	75.9	76.8	175.3	106.3	62.5	91	112.9	86.9	112.3	1.23496e+06	1.25116e+06	2.90939e+06	1.72927e+06	1.01982e+06	1.48144e+06	1.85986e+06	1.41606e+06	1.87977e+06
P28653	Biglycan OS=Mus musculus OX=10090 GN=Bgn PE=1 SV=1	biglycan	BGN	Extracellular Space	other	0	0	68.266	25	7	39	7	1	369	41.6	7.27	407	7	0	2.13	1.011	0.265521	0.532111	67.6	61.3	143	91.6	175.6	144	68.3	65.7	83	1.55337e+07	1.37492e+07	3.20587e+07	2.05326e+07	3.93697e+07	3.23485e+07	1.54215e+07	1.50977e+07	1.88081e+07
P70444	BH3-interacting domain death agonist OS=Mus musculus OX=10090 GN=Bid PE=1 SV=2	BH3 interacting domain death agonist	BID	Cytoplasm	other	0	0	44.023	23	3	12	3	1	195	21.9	4.81	108	3	0	0.901	0.844	0.780889	0.259784	110.5	80.8	140.7	99.6	87.2	126.6	93.3	66.3	95.1	2.65144e+07	1.9436e+07	3.36627e+07	2.38402e+07	2.09201e+07	3.03449e+07	2.23082e+07	1.59531e+07	2.28189e+07
D3Z6Q9	Bridging integrator 2 OS=Mus musculus OX=10090 GN=Bin2 PE=1 SV=1	bridging integrator 2	BIN2	Plasma Membrane	other	0	0	12.487	3	1	1	1	1	489	52.5	5.34	42	1	0
O88738	Baculoviral IAP repeat-containing protein 6 OS=Mus musculus OX=10090 GN=Birc6 PE=1 SV=2	baculoviral IAP repeat containing 6	BIRC6	Cytoplasm	enzyme	0	0	279.609	10	25	257	25	1	4882	531.8	6.07	1991	25	0	1.061	0.85	0.888907	0.278911	106.9	83.4	132.1	69.8	129	113.5	97	77.4	90.9	4.26309e+07	3.30826e+07	5.24443e+07	2.78635e+07	5.11821e+07	4.50007e+07	3.84779e+07	3.06902e+07	3.60625e+07
Q8R016	Bleomycin hydrolase OS=Mus musculus OX=10090 GN=Blmh PE=1 SV=1	bleomycin hydrolase	BLMH	Cytoplasm	peptidase	0	0	39.021	16	4	14	4	1	455	52.5	6.48	225	4	0	1.126	1.115	0.235456	0.477766	101.2	16.2	102.7	114	90.8	171.4	112.9	60	130.8	3.24071e+06	767532	3.29754e+06	3.62108e+06	2.89e+06	5.4787e+06	3.58889e+06	1.93514e+06	4.15916e+06
O55102	Biogenesis of lysosome-related organelles complex 1 subunit 1 OS=Mus musculus OX=10090 GN=Bloc1s1 PE=1 SV=2	biogenesis of lysosomal organelles complex 1 subunit 1	BLOC1S1	Cytoplasm	other	0	0.016	3.219	23	1	1	1	1	125	14.3	8.15	0	1	0	1.76	1.654	0.278637	0.148842	64.4	54.9	102.6	65.1	162.5	113.3	88.4	106.5	142.5	334979	271973	508351	322227	869145	561415	442313	610554	705221
Q5U5M8	Biogenesis of lysosome-related organelles complex 1 subunit 3 OS=Mus musculus OX=10090 GN=Bloc1s3 PE=1 SV=1	biogenesis of lysosomal organelles complex 1 subunit 3	BLOC1S3	Cytoplasm	transporter	0	0	17.574	13	2	7	2	1	195	20.4	4.92	146	2	0	1.429	1.301	0.12457	0.394407	93.1	69.8	81	115.8	87.3	144.5	105.4	64.3	138.6	1.11609e+07	9.00895e+06	9.74329e+06	1.40153e+07	1.07407e+07	1.73383e+07	1.26612e+07	7.90422e+06	1.69855e+07
Q8R015	Biogenesis of lysosome-related organelles complex 1 subunit 5 OS=Mus musculus OX=10090 GN=Bloc1s5 PE=1 SV=1	biogenesis of lysosomal organelles complex 1 subunit 5	BLOC1S5	Extracellular Space	other	0	0.011	3.729	7	1	1	1	1	185	21.3	7.34	18	1	0	1.199	0.897	0.111011	0.554547	96.3	99	77.9	115.5	149.1	102.6	86.4	90.9	82.2	873984	898735	708119	1.04818e+06	1.35555e+06	949803	784118	825066	746006
Q9CY64	Biliverdin reductase A OS=Mus musculus OX=10090 GN=Blvra PE=1 SV=1	biliverdin reductase A	BLVRA	Cytoplasm	enzyme	0	0	95.223	46	9	82	9	1	295	33.5	7.02	875	9	0	2.271	1.325	0.002646	0.091687	78.9	46.5	64.6	127.8	151.2	146.8	116.1	82.6	85.6	3.51721e+07	2.09134e+07	2.9133e+07	5.69483e+07	6.73343e+07	6.54046e+07	5.17116e+07	3.67922e+07	3.89896e+07
Q923D2	Flavin reductase (NADPH) OS=Mus musculus OX=10090 GN=Blvrb PE=1 SV=3	biliverdin reductase B	BLVRB	Cytoplasm	enzyme	0	0	61.193	36	5	43	5	1	206	22.2	7.01	403	5	0	2.327	1.872	0.137816	0.005125	64.7	58.3	45.4	135.6	222.2	65	109.1	90.5	109.2	1.24438e+07	1.1197e+07	8.72425e+06	2.6272e+07	4.27376e+07	1.25015e+07	2.11018e+07	1.74055e+07	2.11217e+07
O35607	Bone morphogenetic protein receptor type-2 OS=Mus musculus OX=10090 GN=Bmpr2 PE=1 SV=1	bone morphogenetic protein receptor type 2	BMPR2	Plasma Membrane	kinase	1	0	15.02	3	2	7	2	1	1038	114.9	6.23	23	2	0	0.672	0.628	0.092939	0.194015	150.5	127.9	98.4	102	57.2	85.9	80.3	122.1	75.7	4.49196e+07	3.80312e+07	2.92242e+07	3.0596e+07	1.71617e+07	2.55669e+07	2.4412e+07	3.61627e+07	2.254e+07
Q8BXK4	S-adenosylmethionine sensor upstream of mTORC1 OS=Mus musculus OX=10090 GN=Bmt2 PE=2 SV=2	base methyltransferase of 25S rRNA 2 homolog	BMT2	Other	other	0	0.084	1.786	3	1	9	1	1	403	45.9	6.27	15	1	0	0.875	0.818	0.618028	0.643978	97.1	105.1	43.2	84.9	189.7	46.8	79.4	218.4	35.2	1.16621e+06	1.21521e+06	495413	1.06732e+06	2.20536e+06	547708	948740	2.58675e+06	417695
Q6QD59	Vesicle transport protein SEC20 OS=Mus musculus OX=10090 GN=Bnip1 PE=1 SV=1	BCL2 interacting protein 1	BNIP1	Cytoplasm	transporter	1	0	22.961	13	2	18	2	1	228	26.2	8.75	432	2	0	1.168	1.173	0.158076	0.395123	84.6	90.6	97	127.1	105.9	93.5	113.1	106.3	81.8	3.8447e+06	4.11031e+06	4.39901e+06	5.76382e+06	4.81595e+06	4.24728e+06	5.12632e+06	4.82e+06	3.74063e+06
P15327	Bisphosphoglycerate mutase OS=Mus musculus OX=10090 GN=Bpgm PE=1 SV=2	bisphosphoglycerate mutase	BPGM	Extracellular Space	phosphatase	0	0	14.78	11	2	3	2	1	259	30	7.06	22	2	0	8.18	5.695	0.065662	0.041323	19.8	24.4	13.3	161.9	263.8	65.2	112.7	62.6	176.3	865986	1.1236e+06	596020	6.56935e+06	1.07082e+07	2.64487e+06	4.72406e+06	2.63043e+06	7.16307e+06
Q8R164	Valacyclovir hydrolase OS=Mus musculus OX=10090 GN=Bphl PE=1 SV=1	biphenyl hydrolase like	BPHL	Cytoplasm	enzyme	0	0	301.785	67	19	663	19	1	291	32.8	8.94	9643	19	0	1.061	1.408	0.893997	0.697119	136.9	77.8	77.3	132.2	65.2	82.6	145.4	109.6	73.1	6.3708e+08	3.6154e+08	3.59194e+08	6.14231e+08	3.04837e+08	3.83707e+08	6.75533e+08	5.10076e+08	3.40038e+08
P07743	BPI fold-containing family A member 2 OS=Mus musculus OX=10090 GN=Bpifa2 PE=1 SV=1	BPI fold containing family A member 2	BPIFA2	Extracellular Space	other	0	0	32.239	35	5	6	5	1	235	24.7	5.01	59	5	0	1.019	1.225	0.535927	0.245876	105.7	86.4	46.1	101.5	88	85.7	105.9	88.8	191.9	7.68508e+06	6.28771e+06	3.34354e+06	7.36934e+06	6.39606e+06	6.22367e+06	7.69042e+06	6.47751e+06	1.39555e+07
Q9Z0S1	3'(2'),5'-bisphosphate nucleotidase 1 OS=Mus musculus OX=10090 GN=Bpnt1 PE=1 SV=2	3'(2'), 5'-bisphosphate nucleotidase 1	BPNT1	Nucleus	phosphatase	0	0	293.521	59	15	350	15	1	308	33.2	5.82	7346	15	0	1.736	1.507	0.002987	0.195311	90.2	70.5	71.1	120.4	133	123.4	109.2	75.1	107.1	2.35483e+08	1.83565e+08	1.85244e+08	3.13855e+08	3.46796e+08	3.21627e+08	2.84867e+08	1.95733e+08	2.79265e+08
P46737	Lys-63-specific deubiquitinase BRCC36 OS=Mus musculus OX=10090 GN=Brcc3 PE=1 SV=1	BRCA1/BRCA2-containing complex subunit 3	BRCC3	Nucleus	enzyme	0	0	27.638	13	3	17	3	1	291	33.3	5.83	136	3	0	1.263	1.445	0.191469	0.16388	82.4	72.2	91.2	104.1	82.5	133.6	119.1	79.9	135	3.88765e+06	3.3752e+06	4.26207e+06	4.86675e+06	3.85701e+06	6.27246e+06	5.59802e+06	3.7803e+06	6.32706e+06
P28662	Brain protein I3 OS=Mus musculus OX=10090 GN=Bri3 PE=2 SV=2	brain protein I3	BRI3	Cytoplasm	other	2	0	30.978	16	2	6	2	1	125	13.6	8.41	292	2	0	0.832	0.856	0.074841	0.39581	102.3	116.8	113	81.4	102.6	94	96.7	121.1	72.2	6.1129e+06	7.00035e+06	6.77405e+06	4.88568e+06	6.14751e+06	5.62429e+06	5.78011e+06	7.30677e+06	4.31829e+06
Q91VR8	Protein BRICK1 OS=Mus musculus OX=10090 GN=Brk1 PE=1 SV=1	BRICK1 subunit of SCAR/WAVE actin nucleating complex	BRK1	Cytoplasm	other	0	0	15.489	17	1	1	1	1	75	8.8	5.45	58	1	0	1.845	1.528	0.526171	0.867	68.1	49	141.5	125.6	49.5	183.1	104.1	27.3	151.8	1.16293e+06	801301	2.32235e+06	2.05749e+06	847082	3.04611e+06	1.72439e+06	446775	2.51759e+06
Q8K2Q7	BRO1 domain-containing protein BROX OS=Mus musculus OX=10090 GN=Brox PE=1 SV=1	BRO1 domain and CAAX motif containing	BROX	Cytoplasm	other	0	0	19.034	18	3	6	3	1	411	46.2	7.69	56	3	0	10.566	6.619	0.014149	0.032512	13	15.2	15.8	160.2	89.8	201.7	94.6	100.3	209.5	168326	196453	204159	2.23481e+06	1.88713e+06	2.62228e+06	1.22561e+06	1.30033e+06	2.74365e+06
P18572	Basigin OS=Mus musculus OX=10090 GN=Bsg PE=1 SV=2	basigin (Ok blood group)	BSG	Plasma Membrane	transporter	1	0	153.431	23	11	793	11	1	389	42.4	5.85	9596	11	0	1.085	1.263	0.471494	0.162708	97.9	92.4	83.4	119.1	100.2	81.9	116.7	90.2	118.2	1.2337e+09	1.16472e+09	1.05213e+09	1.49956e+09	1.26234e+09	1.03395e+09	1.46967e+09	1.13723e+09	1.49027e+09
Q8VIM4	Barttin OS=Mus musculus OX=10090 GN=Bsnd PE=1 SV=3	barttin CLCNK type accessory beta subunit	BSND	Plasma Membrane	ion channel	2	0	142.886	38	9	159	9	1	307	33.8	4.67	2383	9	0	2.193	2.134	0.008229	0.072197	84.8	57.1	55.6	125.3	126.2	108.4	139.8	80.7	122	1.02212e+08	6.85497e+07	6.70163e+07	1.50648e+08	1.52108e+08	1.2971e+08	1.67133e+08	9.67127e+07	1.45841e+08
Q80YW5	B box and SPRY domain-containing protein OS=Mus musculus OX=10090 GN=Bspry PE=1 SV=1	B-box and SPRY domain containing	BSPRY	Cytoplasm	other	0	0	42.315	13	4	41	4	1	473	52.7	6.38	640	4	0	1.64	1.489	0.11345	0.105225	67.3	63.5	92.2	87.8	153.2	110.4	100.2	90.1	135.3	3.12188e+06	2.94606e+06	4.29281e+06	4.07513e+06	7.10831e+06	5.12026e+06	4.6574e+06	4.18217e+06	6.28943e+06
Q64277	ADP-ribosyl cyclase/cyclic ADP-ribose hydrolase 2 OS=Mus musculus OX=10090 GN=Bst1 PE=1 SV=1	bone marrow stromal cell antigen 1	BST1	Plasma Membrane	enzyme	1	0	188.346	41	11	394	11	1	311	34.6	5.8	6364	11	0	1.005	0.897	0.920058	0.737301	118.2	86	101.2	101.7	107.8	92.6	112.5	90.8	89.2	3.3026e+08	2.40394e+08	2.83084e+08	2.84151e+08	3.01501e+08	2.58649e+08	3.14122e+08	2.55145e+08	2.49317e+08
Q8R2Q8	Bone marrow stromal antigen 2 OS=Mus musculus OX=10090 GN=Bst2 PE=1 SV=1	bone marrow stromal cell antigen 2	Bst2	Plasma Membrane	other	1	0	76.995	17	5	78	5	1	172	19.1	7.34	1222	5	0	1.158	1.225	0.480285	0.394735	92.3	75.4	105.9	125.5	78.9	106.9	113	82.3	119.8	2.37958e+07	1.96339e+07	2.724e+07	3.30779e+07	2.0408e+07	2.74326e+07	2.90342e+07	2.117e+07	3.08145e+07
Q8CIF4	Biotinidase OS=Mus musculus OX=10090 GN=Btd PE=1 SV=2	biotinidase	BTD	Extracellular Space	enzyme	0	0	19.657	7	2	7	2	1	520	58.1	5.8	34	2	0	2.548	1.373	0.2171	0.459302	105.8	20	48.8	124.3	263.2	66.4	67	150.8	53.7	1.26061e+06	238380	975775	1.49856e+06	3.13459e+06	1.23851e+06	1.36533e+06	1.79626e+06	898062
Q64152	Transcription factor BTF3 OS=Mus musculus OX=10090 GN=Btf3 PE=1 SV=3	basic transcription factor 3	BTF3	Nucleus	transcription regulator	0	0	30.247	11	2	32	2	1	204	22	9.52	140	2	0	2.416	2.397	0.013966	0.036928	75.7	51.7	50.7	142.4	124.9	99	145.6	86.1	123.9	1.17862e+06	804222	788279	2.21707e+06	1.94839e+06	1.53832e+06	2.26371e+06	1.34959e+06	1.93335e+06
Q9CQH7	Transcription factor BTF3 homolog 4 OS=Mus musculus OX=10090 GN=Btf3l4 PE=1 SV=1	basic transcription factor 3 like 4	BTF3L4	Other	other	0	0	25.972	45	2	16	2	1	158	17.3	6.35	179	2	0	1.684	1.909	0.074667	0.144473	90.2	34	62.1	104.6	92.2	125.9	118.6	78.2	194.4	745713	283254	510466	874481	757204	1.04251e+06	988999	643986	1.59977e+06
Q8BJE2	Butyrophilin-like protein 9 OS=Mus musculus OX=10090 GN=Btnl9 PE=1 SV=1	butyrophilin like 9	BTNL9	Plasma Membrane	other	1	0	84.832	16	8	111	8	1	536	60.5	6.42	1980	8	0	1.452	1.203	0.070363	0.67093	82.3	105.8	80.4	124.6	119.5	102.3	108.1	99	78	8.23233e+07	1.05808e+08	8.03767e+07	1.24649e+08	1.19691e+08	1.02396e+08	1.0809e+08	9.92645e+07	7.81438e+07
Q9CQC6	Basic leucine zipper and W2 domain-containing protein 1 OS=Mus musculus OX=10090 GN=Bzw1 PE=1 SV=1	basic leucine zipper and W2 domains 1	BZW1	Cytoplasm	translation regulator	0	0	16.857	6	1	24	1	1	419	48	5.92	57	1	0	1.764	1.301	0.222206	0.139054	45.6	79.7	94.3	149.4	140.7	63.4	133.6	103.7	89.6	564204	908185	1.07471e+06	1.74019e+06	1.60786e+06	721746	1.532e+06	1.19573e+06	1.02406e+06
Q91V76	Ester hydrolase C11orf54 homolog OS=Mus musculus OX=10090 PE=1 SV=1	chromosome 11 open reading frame 54	C11orf54	Nucleus	enzyme	0	0	402.548	75	21	635	21	1	315	35	6.29	7805	21	0	1.896	1.444	0.061214	0.408562	105.9	67.9	68.6	133.6	102.4	130	118.2	74.5	99	4.6985e+08	3.01399e+08	3.04604e+08	5.9276e+08	4.54786e+08	5.76783e+08	5.24579e+08	3.31266e+08	4.39349e+08
Q9JK81	UPF0160 protein MYG1, mitochondrial OS=Mus musculus OX=10090 GN=Myg1 PE=1 SV=1	chromosome 12 open reading frame 10	C12orf10	Nucleus	other	0	0.015	3.354	3	1	2	1	1	380	42.7	7.02	0	1	0
Q9CYI0	Protein Njmu-R1 OS=Mus musculus OX=10090 PE=1 SV=2	chromosome 17 open reading frame 75	C17orf75	Extracellular Space	other	0	0.001	9.509	3	1	6	1	1	393	44.4	5.05	108	1	0	4.2	1.738	0.070625	0.441275	28.4	80.9	33.5	243.8	98.3	140.8	186.9	58.3	29	293237	392302	360101	1.1811e+06	482472	682100	922470	283326	314838
Q3TQQ9	Uncharacterized protein C1orf112 homolog OS=Mus musculus OX=10090 PE=1 SV=2	chromosome 1 open reading frame 112	C1orf112	Other	other	0	0.064	1.982	3	1	4	1	1	903	101.2	6.84	0	1	0
Q8BI29	Specifically androgen-regulated gene protein OS=Mus musculus OX=10090 GN=Sarg PE=1 SV=2	chromosome 1 open reading frame 116	C1orf116	Cytoplasm	other	0	0	25.14	6	2	2	2	1	606	65.1	9.14	27	2	0	0.51	0.587	0.517776	0.309472	92.9	187.5	101.7	49.9	172.8	51.8	59.7	132.7	50.9	1.21027e+06	2.4349e+06	1.32028e+06	648641	2.25757e+06	689525	781295	1.72244e+06	668331
Q8C3W1	Uncharacterized protein C1orf198 homolog OS=Mus musculus OX=10090 PE=1 SV=1	chromosome 1 open reading frame 198	C1orf198	Cytoplasm	other	0	0.001	7.337	9	2	2	2	1	322	35.3	5.24	33	2	0	0.848	0.758	0.140275	0.001155	126	125.9	128.4	106.9	126.9	94.9	92.4	98.6		3.12329e+06	2.92263e+06	3.02578e+06	2.49096e+06	2.95507e+06	2.20532e+06	2.13691e+06	2.28831e+06
Q8R092	Uncharacterized protein C1orf43 homolog OS=Mus musculus OX=10090 PE=2 SV=1	chromosome 1 open reading frame 43	C1orf43	Plasma membrane	other	1	0.001	6.296	6	1	1	1	1	253	28.7	9.36	33	1	0	1.174	0.916	0.685617	0.744356	106.2	102	76.6	119.7	126.8	66.1	128.4	93.4	80.8	1.41124e+06	1.31631e+06	991513	1.54546e+06	1.65294e+06	853785	1.67353e+06	1.2059e+06	1.05201e+06
Q5EBG8	Uncharacterized protein C1orf50 homolog OS=Mus musculus OX=10090 PE=1 SV=1	chromosome 1 open reading frame 50	C1orf50	Other	other	0	0.001	9.163	11	1	4	1	1	199	21.8	5.53	0	1	0	1.754	1.398	0.177769	0.338846	86.8	58.9	67.6	188.4	118.5	74.2	152.2	59	94.5	242949	164887	189141	530627	338865	207560	425826	166381	265534
P98086	Complement C1q subcomponent subunit A OS=Mus musculus OX=10090 GN=C1qa PE=1 SV=2	complement C1q A chain	C1QA	Extracellular Space	other	0	0	17.115	6	1	5	1	1	245	26	9.11	57	1	0	3.312	4.159	0.011607	0.131973	46.1	12.2	29.1	96.3	144.6	96.1	121	64.4	290.1	343762	89797.7	233427	722884	1.06293e+06	715081	887760	473844	2.1628e+06
O35658	Complement component 1 Q subcomponent-binding protein, mitochondrial OS=Mus musculus OX=10090 GN=C1qbp PE=1 SV=1	complement C1q binding protein	C1QBP	Cytoplasm	transcription regulator	0	0	45.115	10	2	32	2	1	278	31	4.92	796	2	0	0.847	1.092	0.556437	0.94101	65.9	150.2	102.8	87	74.3	107.2	82.9	112.2	117.5	2.43236e+06	5.48483e+06	3.76854e+06	3.1956e+06	2.71981e+06	3.99218e+06	3.02645e+06	4.09301e+06	4.35917e+06
E9Q3C1	C2 domain-containing protein 2 OS=Mus musculus OX=10090 GN=C2cd2 PE=1 SV=1	C2 calcium dependent domain containing 2	C2CD2	Cytoplasm	other	1	0	17.121	5	3	17	3	1	696	76.5	7.72	186	3	0	0.961	0.999	0.468312	0.881659	104.9	106.4	93.2	103.6	100.8	78.7	131.2	104.8	76.3	6.17956e+06	6.33013e+06	5.50387e+06	6.09684e+06	5.94032e+06	4.63578e+06	7.75093e+06	6.23148e+06	4.52801e+06
Q80X80	Phospholipid transfer protein C2CD2L OS=Mus musculus OX=10090 GN=C2cd2l PE=1 SV=3	C2CD2 like	C2CD2L	Cytoplasm	transporter	1	0	76.756	16	7	89	7	1	706	76.3	7.21	1174	7	0	1.013	1.189	0.984724	0.684209	103.3	80.4	106.9	120.4	104.7	66.6	126.5	122.8	68.3	1.18883e+07	9.16351e+06	1.22152e+07	1.37728e+07	1.19561e+07	7.66474e+06	1.44109e+07	1.39926e+07	7.84092e+06
Q7TPS5	C2 domain-containing protein 5 OS=Mus musculus OX=10090 GN=C2cd5 PE=1 SV=2	C2 calcium dependent domain containing 5	C2CD5	Cytoplasm	other	0	0	10.321	4	2	10	2	1	1016	111.6	5.78	33	2	0	1.217	0.566	0.751064	0.855263	41.7	118.2	114.4	29.3	139.3	153	64.8	49.2	190.1	533492	1.12092e+06	1.08702e+06	276382	1.31837e+06	1.46575e+06	711550	572319	1.82986e+06
P01027	Complement C3 OS=Mus musculus OX=10090 GN=C3 PE=1 SV=3	complement C3	C3	Extracellular Space	peptidase	1	0	821.28	50	66	796	66	1	1663	186.4	6.73	11792	66	0	4.24	5.53	0.009038	0.065453	31.2	28	28	118.7	140.7	80.1	154.8	70.8	247.7	1.33671e+08	1.20042e+08	1.19814e+08	5.0839e+08	6.02301e+08	3.43333e+08	6.62891e+08	3.03009e+08	1.06034e+09
P01029	Complement C4-B OS=Mus musculus OX=10090 GN=C4b PE=1 SV=3	complement C4B (Chido blood group)	C4A/C4B	Extracellular Space	other	0	0	208.078	15	14	119	14	1	1738	192.8	7.53	1397	14	0	3.565	6.606	0.025884	0.076976	28.4	16.7	29.4	85.4	101.1	173.9	187.4	48.1	229.5	1.25847e+07	7.41342e+06	1.3106e+07	3.79217e+07	4.48742e+07	7.72657e+07	8.30293e+07	2.13306e+07	1.01794e+08
Q99K99	Uncharacterized protein C4orf19 homolog OS=Mus musculus OX=10090 PE=1 SV=2	chromosome 4 open reading frame 19	C4orf19	Nucleus	other	0	0	19.439	9	2	23	2	1	313	33.9	4.44	256	2	0	0.713	0.785	0.467354	0.276803	134.3	86.2	121.9	137.3	45.5	86.9	94.8	97.5	95.6	2.93422e+06	1.90283e+06	2.67901e+06	2.99951e+06	993810	1.90417e+06	2.07244e+06	2.13167e+06	2.09063e+06
P06684	Complement C5 OS=Mus musculus OX=10090 GN=C5 PE=1 SV=2	complement C5	C5	Extracellular Space	cytokine	0	0	32.909	4	4	10	4	1	1680	188.8	6.81	116	4	0	13.961	30.512	0.025403	0.524599			4.4	62	64.6	50.2	135.5	40.8	542.4			64504.3	910720	939322	730670	2.0058e+06	593984	7.88574e+06
P30993	C5a anaphylatoxin chemotactic receptor 1 OS=Mus musculus OX=10090 GN=C5ar1 PE=1 SV=2	complement C5a receptor 1	C5AR1	Plasma Membrane	G-protein coupled receptor	7	0	9.744	3	1	9	1	1	351	39	8.79	137	1	0	1.582	1.982	0.036566	0.031965	57.8	65.9	80.4	104.3	83.8	105.3	130.6	102.6	169.5	1.75544e+06	2.05896e+06	2.46225e+06	3.1782e+06	2.62005e+06	3.25658e+06	3.96395e+06	3.1867e+06	5.1561e+06
Q8BR90	UPF0600 protein C5orf51 homolog OS=Mus musculus OX=10090 PE=1 SV=1	chromosome 5 open reading frame 51	C5orf51	Other	other	0	0	11.707	8	2	17	2	1	294	33.5	5.19	96	2	0	0.92	0.838	0.467172	0.842836	53.6	108.7	115.2	100.1	132.9	98.7	111.1	91.1	88.5	4.40143e+06	7.91736e+06	8.32856e+06	7.43354e+06	9.61197e+06	7.1569e+06	8.23519e+06	6.62162e+06	6.43888e+06
Q5SS90	Uncharacterized protein C7orf57 homolog OS=Mus musculus OX=10090 GN=Gm11992 PE=1 SV=1	chromosome 7 open reading frame 57	C7orf57	Other	other	0	0	23.058	12	2	5	2	1	291	32.9	8.68	54	2	0	1.016	1.219	0.477522	0.952954	67.7	174.6	86.4	92	87.7	70	105.3	141.6	74.6	1.18948e+06	3.03814e+06	1.5447e+06	1.6021e+06	1.52795e+06	1.21834e+06	1.83847e+06	2.49191e+06	1.30786e+06
Q8K182	Complement component C8 alpha chain OS=Mus musculus OX=10090 GN=C8a PE=1 SV=1	complement C8 alpha chain	C8A	Extracellular Space	other	0	0	28.202	5	2	7	2	1	587	66	6.54	37	2	0	2.154	5.828	0.562831	0.30306	77.6	18.1		80.7	91.5	33.5	218.3	29.6	350.7	833074	193857		882013	981832	561730	2.3421e+06	354356	3.76298e+06
Q8BH35	Complement component C8 beta chain OS=Mus musculus OX=10090 GN=C8b PE=1 SV=1	complement C8 beta chain	C8B	Extracellular Space	other	0	0	56.152	13	5	11	5	1	589	66.2	7.77	263	5	0	19.372	41.634	0.09697	0.113946	4.1	4.5	5.4	86.8	95.9	9.3	186.5	63	444.6	365015	235923	282195	4.59998e+06	5.07358e+06	973972	9.87995e+06	3.48429e+06	2.34344e+07
Q8VCG4	Complement component C8 gamma chain OS=Mus musculus OX=10090 GN=C8g PE=1 SV=1	complement C8 gamma chain	C8G	Extracellular Space	transporter	0	0	50.613	35	5	12	5	1	202	22.5	9.25	511	5	0	3.29	6.586	0.016677	0.164221	23.4	9.4	20.5	67.5	110.8	63	135.1	57	413.3	1.87382e+06	756970	1.63971e+06	5.46217e+06	8.87651e+06	5.11926e+06	1.07844e+07	5.15024e+06	3.30197e+07
P06683	Complement component C9 OS=Mus musculus OX=10090 GN=C9 PE=1 SV=2	complement C9	C9	Extracellular Space	other	0	0	58.342	17	8	30	8	1	548	62	5.78	459	8	0	6.331	35.99	1.2e-05	0.157308	6.6	6	4.5	38.2	38.1	41.4	217.3	27.5	520.3	346026	858168	239702	2.0303e+06	2.17733e+06	2.17469e+06	1.14748e+07	1.59983e+06	2.7388e+07
Q6DFW0	Guanine nucleotide exchange C9orf72 homolog OS=Mus musculus OX=10090 PE=1 SV=2	C9orf72-SMCR8 complex subunit	C9orf72	Cytoplasm	other	0	0.016	3.154	2	1	1	1	1	481	54.2	6.09	21	1	0
P13634	Carbonic anhydrase 1 OS=Mus musculus OX=10090 GN=Ca1 PE=1 SV=4	carbonic anhydrase 1	CA1	Cytoplasm	enzyme	0	0	12.432	5	1	2	1	1	261	28.3	6.96	44	1	0	Present in 4h only	Present in 8h only						179.4	233.6	58	175.2	66.5	187.3				2.77312e+06	3.62006e+06	894902	2.71102e+06	1.02672e+06	2.89397e+06
Q8CI85	Carbonic anhydrase 12 OS=Mus musculus OX=10090 GN=Ca12 PE=1 SV=1	carbonic anhydrase 12	CA12	Plasma Membrane	enzyme	1	0	349.713	46	13	743	13	1	354	39.7	8.05	8151	13	0	0.929	1.206	0.990943	0.527786	114.7	81.2	94.6	116.2	85.9	87.9	114	86.5	119.1	5.32182e+08	3.76147e+08	4.3848e+08	5.38931e+08	3.99744e+08	4.07485e+08	5.29107e+08	4.00974e+08	5.52354e+08
Q9WVT6	Carbonic anhydrase 14 OS=Mus musculus OX=10090 GN=Ca14 PE=1 SV=1	carbonic anhydrase 14	CA14	Plasma Membrane	enzyme	1	0	166.929	25	10	523	10	1	337	37.5	6.35	11165	10	0	0.696	0.82	0.103064	0.382647	119	122	99.7	105.7	63.8	82.9	97.6	89.5	119.9	5.53494e+08	5.66449e+08	4.63735e+08	4.90737e+08	2.96137e+08	3.85042e+08	4.53183e+08	4.166e+08	5.57078e+08
P00920	Carbonic anhydrase 2 OS=Mus musculus OX=10090 GN=Ca2 PE=1 SV=4	carbonic anhydrase 2	CA2	Cytoplasm	enzyme	0	0	214.89	67	13	288	13	1	260	29	7.01	4195	13	0	1.712	1.646	0.286099	0.443939	113.9	53	73.3	154.7	71.5	125.6	124.1	63.2	120.8	1.98966e+08	9.27774e+07	1.28084e+08	2.70077e+08	1.2481e+08	2.19202e+08	2.1668e+08	1.10884e+08	2.10834e+08
P16015	Carbonic anhydrase 3 OS=Mus musculus OX=10090 GN=Ca3 PE=1 SV=3	carbonic anhydrase 3	CA3	Cytoplasm	enzyme	0	0	99.798	51	10	89	10	1	260	29.3	7.37	756	10	0	1.564	1.176	0.096245	0.524734	107.5	78.3	62.1	149.8	122.6	101.2	92.1	82.5	103.9	7.35153e+07	5.34837e+07	4.23976e+07	1.0232e+08	8.36677e+07	6.91063e+07	6.29661e+07	5.63452e+07	7.09076e+07
Q64444	Carbonic anhydrase 4 OS=Mus musculus OX=10090 GN=Ca4 PE=1 SV=1	carbonic anhydrase 4	CA4	Plasma Membrane	enzyme	0	0	314.782	51	17	712	17	1	305	34.3	8.21	6956	17	0	0.999	1.004	0.994825	0.964557	112.9	105.6	82.4	105.5	116.4	78.7	106	120.2	72.3	8.03211e+08	7.50706e+08	5.85909e+08	7.49762e+08	8.27941e+08	5.59298e+08	7.53764e+08	8.54833e+08	5.1379e+08
Q9QZA0	Carbonic anhydrase 5B, mitochondrial OS=Mus musculus OX=10090 GN=Ca5b PE=1 SV=2	carbonic anhydrase 5B	CA5B	Cytoplasm	enzyme	0	0.001	7.083	5	1	3	1	1	317	36.6	7.31	26	1	0	1.036	0.733	0.982271	0.933291	117.8	57.4	129.3	146.1	33.4	122.1	159.7	47.9	86.3	1.14909e+06	544378	1.2341e+06	1.38402e+06	316308	1.1583e+06	1.53921e+06	454288	817754
Q8VHB5	Carbonic anhydrase 9 OS=Mus musculus OX=10090 GN=Ca9 PE=2 SV=2	carbonic anhydrase 9	CA9	Nucleus	enzyme	1	0.036	2.427	3	1	2	1	1	437	47.2	4.82	0	1	0
Q06138	Calcium-binding protein 39 OS=Mus musculus OX=10090 GN=Cab39 PE=1 SV=2	calcium binding protein 39	CAB39	Cytoplasm	enzyme	0	0.001	9.129	3	1	13	1	1	341	39.8	6.89	185	1	0	0.745	0.951	0.794315	0.703246	105.5	59.8	157.2	78.6	76.5	138.4	100.3	68.4	115.3	3.36998e+06	1.90566e+06	5.01507e+06	2.50443e+06	2.44105e+06	4.4089e+06	3.19806e+06	2.18725e+06	3.7162e+06
Q9DB16	Calcium-binding protein 39-like OS=Mus musculus OX=10090 GN=Cab39l PE=1 SV=3	calcium binding protein 39 like	CAB39L	Cytoplasm	kinase	0	0	15.032	8	2	6	2	1	337	39.1	8.31	30	2	0	0.808	0.724	0.956907	0.709305	121	30	168.4	97.8	64.2	149.2	75.2	87.6	106.6	1.23999e+06	306591	1.73291e+06	998457	676992	1.52263e+06	800313	899210	1.08806e+06
Q8BG21	Calcium channel flower homolog OS=Mus musculus OX=10090 GN=Cacfd1 PE=1 SV=1	calcium channel flower domain containing 1	CACFD1	Plasma Membrane	ion channel	3	0.059	2.029	9	1	4	1	1	171	18.3	5.44	0	1	0	0.79	0.879	0.384767	0.354866	91.2	177.1	97.3	76.9	125.4	66.5	85.5	117.3	62.9	3.67146e+06	7.12702e+06	3.92061e+06	3.11034e+06	5.04931e+06	2.67968e+06	3.48122e+06	4.73177e+06	2.55045e+06
O08532	Voltage-dependent calcium channel subunit alpha-2/delta-1 OS=Mus musculus OX=10090 GN=Cacna2d1 PE=1 SV=1	calcium voltage-gated channel auxiliary subunit alpha2delta 1	CACNA2D1	Plasma Membrane	ion channel	0	0	367.851	32	28	473	28	1	1103	124.6	5.3	6836	28	0	1.294	1.177	0.24457	0.309016	84	98.9	89.1	115.4	119.7	85	117.6	104.9	85.5	2.33413e+08	2.7479e+08	2.47673e+08	3.20961e+08	3.32473e+08	2.3609e+08	3.27557e+08	2.9141e+08	2.37697e+08
Q9CXW3	Calcyclin-binding protein OS=Mus musculus OX=10090 GN=Cacybp PE=1 SV=1	calcyclin binding protein	CACYBP	Nucleus	other	0	0	38.571	23	4	31	4	1	229	26.5	7.87	112	4	0	0.948	0.761	0.510907	0.262307	106.4	127.1	96.4	100.8	118.9	78	77.5	113.9	81	3.3557e+07	4.00627e+07	3.04021e+07	3.1801e+07	3.7533e+07	2.46002e+07	2.44374e+07	3.59204e+07	2.5532e+07
B2RQC6	CAD protein OS=Mus musculus OX=10090 GN=Cad PE=1 SV=1	carbamoyl-phosphate synthetase 2, aspartate transcarbamylase, and dihydroorotase	CAD	Cytoplasm	enzyme	0	0	23.719	3	4	15	4	1	2225	243.1	6.43	130	4	0	1.097	1.024	0.341052	0.578238	86.7	84	93.1	95.2	199.1	86.8	88.8	89.2	77.1	5.66642e+06	6.1046e+06	6.0809e+06	6.27193e+06	1.30191e+07	5.67588e+06	5.85182e+06	6.16718e+06	5.10011e+06
Q8R5M8	Cell adhesion molecule 1 OS=Mus musculus OX=10090 GN=Cadm1 PE=1 SV=2	cell adhesion molecule 1	CADM1	Plasma Membrane	other	1	0	35.724	18	4	50	4	1	456	49.8	5.03	370	4	0	0.78	0.8	0.449595	0.665227	121.7	76.2	125.6	108.3	94.9	72.7	108.2	95	97.4	1.96e+07	1.23337e+07	2.02562e+07	1.74499e+07	1.55767e+07	1.19195e+07	1.74263e+07	1.57503e+07	1.57927e+07
Q8R464	Cell adhesion molecule 4 OS=Mus musculus OX=10090 GN=Cadm4 PE=1 SV=1	cell adhesion molecule 4	CADM4	Plasma Membrane	other	1	0	56.37	19	5	74	5	1	388	42.7	6.3	693	5	0	0.949	1.024	0.922143	0.47886	99.2	114.2	99.1	94.2	132.6	90.2	101.6	112.6	56.3	2.80258e+07	3.21886e+07	2.79657e+07	2.65402e+07	3.73881e+07	2.545e+07	2.86146e+07	3.1752e+07	1.73868e+07
Q80TJ1	Calcium-dependent secretion activator 1 OS=Mus musculus OX=10090 GN=Cadps PE=1 SV=3	calcium dependent secretion activator	CADPS	Plasma Membrane	other	0	0.097	1.658	1	1	3	1	1	1355	153	5.74	0	1	0
P12658	Calbindin OS=Mus musculus OX=10090 GN=Calb1 PE=1 SV=2	calbindin 1	CALB1	Cytoplasm	other	0	0	133.968	40	9	254	9	1	261	30	4.83	2526	9	0	1.165	1.012	0.421951	0.807419	114.8	85.3	88	139.3	92.2	102.5	109.8	79.1	89	1.34596e+08	1.00794e+08	1.02972e+08	1.63462e+08	1.08223e+08	1.20256e+08	1.29214e+08	9.32169e+07	1.04569e+08
Q8CGU1	Calcium-binding and coiled-coil domain-containing protein 1 OS=Mus musculus OX=10090 GN=Calcoco1 PE=1 SV=2	calcium binding and coiled-coil domain 1	CALCOCO1	Nucleus	transcription regulator	0	0.001	7.288	2	1	2	1	1	691	77.2	4.82	39	1	0	0.96	0.922	0.346668	0.845063	69.7	108.5	106.3	102	137	100.8	98.4	79.3	98	592742	921487	925701	865976	1.16344e+06	861345	837251	679286	849651
Q9R1W5	Calcitonin gene-related peptide type 1 receptor OS=Mus musculus OX=10090 GN=Calcrl PE=1 SV=2	calcitonin receptor like receptor	CALCRL	Plasma Membrane	G-protein coupled receptor	7	0	42.739	10	4	33	4	1	463	53.2	6.71	876	4	0	0.872	1.011	0.763717	0.979262	102.3	93.5	107.4	89.2	86.4	117.3	110.4	90	103.4	2.64067e+07	2.39822e+07	2.75449e+07	2.28833e+07	2.21615e+07	3.00977e+07	2.84231e+07	2.30737e+07	2.65208e+07
Q8VEC4	Calcium homeostasis modulator protein 2 OS=Mus musculus OX=10090 GN=Calhm2 PE=2 SV=1	calcium homeostasis modulator family member 2	CALHM2	Plasma membrane	other	4	0.001	9.681	10	2	13	2	1	323	35.8	8.28	24	2	0	1.043	1.306	0.777412	0.64199	93.5	36.5	142.2	97.5	76.5	129.2	126.8	75.5	122.1	1.20735e+06	472922	1.83556e+06	1.26829e+06	994685	1.69259e+06	1.63698e+06	1.02814e+06	1.5901e+06
P0DP28	Calmodulin-3 OS=Mus musculus OX=10090 GN=Calm3 PE=1 SV=1	calmodulin 1	Calm1 (includes others)	Nucleus	other	0	0	153.139	62	7	289	7	1	149	16.8	4.22	4111	7	0	0.816	0.693	0.102638	0.012704	133.1	121.2	117.3	114.6	69.8	98.9	95.3	84	65.8	2.475e+08	2.24222e+08	2.1687e+08	2.13624e+08	1.29042e+08	1.83124e+08	1.76717e+08	1.55202e+08	1.21548e+08
Q91WQ9	Calmodulin-like protein 4 OS=Mus musculus OX=10090 GN=Calml4 PE=1 SV=2	calmodulin like 4	CALML4	Other	other	0	0	21.265	14	2	38	2	1	153	17.7	7.96	921	2	0	0.789	0.822	0.980768	0.506653	50.7	114.9	162.7	54.2	90.7	179.6	47	94.4	105.8	1.00537e+07	2.27533e+07	3.22488e+07	1.07908e+07	1.81872e+07	3.55653e+07	9.45263e+06	1.87041e+07	2.09433e+07
P14211	Calreticulin OS=Mus musculus OX=10090 GN=Calr PE=1 SV=1	calreticulin	CALR	Cytoplasm	transcription regulator	0	0	265.698	52	19	354	19	1	416	48	4.49	4727	19	0	1.279	0.955	0.243838	0.76206	93.1	73.9	107.8	119.1	88.7	152.2	88.8	90	86.4	2.12037e+08	1.68234e+08	2.45493e+08	2.7126e+08	2.02078e+08	3.4661e+08	2.02516e+08	2.04945e+08	1.96913e+08
O35887	Calumenin OS=Mus musculus OX=10090 GN=Calu PE=1 SV=1	calumenin	CALU	Cytoplasm	other	0	0	17.235	9	2	9	2	1	315	37	4.67	90	2	0	1.39	0.902	0.583618	0.869784	103.3	31.9	129	143.5	36.2	176.1	107.4	79.5	93.1	4.31853e+06	1.90435e+06	5.41007e+06	6.00446e+06	2.25848e+06	7.35878e+06	4.49304e+06	3.33006e+06	3.90001e+06
Q6PHZ2	Calcium/calmodulin-dependent protein kinase type II subunit delta OS=Mus musculus OX=10090 GN=Camk2d PE=1 SV=1	calcium/calmodulin dependent protein kinase II delta	CAMK2D	Cytoplasm	kinase	0	0	113.617	28	11	167	8	1	499	56.3	7.25	1910	11	3	1.046	0.888	0.383834	0.077577	93.6	98.1	98.3	90.4	161.6	102.6	87.1	92	76.3	6.94094e+07	7.28136e+07	7.3032e+07	6.72165e+07	1.19876e+08	7.6129e+07	6.46234e+07	6.82027e+07	5.66416e+07
Q923T9	Calcium/calmodulin-dependent protein kinase type II subunit gamma OS=Mus musculus OX=10090 GN=Camk2g PE=1 SV=1	calcium/calmodulin dependent protein kinase II gamma	CAMK2G	Cytoplasm	kinase	0	0	48.987	15	6	91	3	1	529	59.6	7.58	826	6	0	1.037	0.834	0.504544	0.52344	91.9	110.9	92.3	95.7	156.4	91.2	77	116.2	68.4	4.97258e+06	6.00061e+06	4.99492e+06	5.17915e+06	8.45869e+06	4.93338e+06	4.18157e+06	6.28776e+06	3.71619e+06
P49070	Calcium signal-modulating cyclophilin ligand OS=Mus musculus OX=10090 GN=Camlg PE=1 SV=2	calcium modulating ligand	CAMLG	Cytoplasm	other	0	0.016	3.219	7	1	3	1	1	294	32.5	7.74	0	1	0	0.884	0.836	0.932853	0.949755	131.2	18.9	151.1	131.2	40.5	116.1	109.7	55.8	145.5	229778	33128.7	264551	228655	70860.1	203322	191812	100327	253588
P51437	Cathelicidin antimicrobial peptide OS=Mus musculus OX=10090 GN=Camp PE=1 SV=2	cathelicidin antimicrobial peptide	CAMP	Cytoplasm	other	0	0	77.292	47	5	51	5	1	172	19.4	8.68	1598	5	0	13.49	18.14	0.069917	0.005087	7.3	12.8	5.6	98.8	284.4	98.8	132.9	91.9	167.4	1.84887e+06	3.23184e+06	1.44213e+06	2.49947e+07	7.17068e+07	2.49724e+07	3.35142e+07	2.31705e+07	4.22334e+07
Q80VC9	Calmodulin-regulated spectrin-associated protein 3 OS=Mus musculus OX=10090 GN=Camsap3 PE=1 SV=1	calmodulin regulated spectrin associated protein family member 3	CAMSAP3	Cytoplasm	other	0	0	19.937	3	2	20	2	1	1252	135.1	8.43	395	2	0	0.824	0.918	0.471108	0.925388	114.6	75.5	120.4	100.4	94.4	78.7	105.1	125.9	85	1.68881e+06	1.11789e+06	1.78468e+06	1.48081e+06	1.44608e+06	1.16931e+06	1.54927e+06	1.85441e+06	1.25258e+06
Q6ZQ38	Cullin-associated NEDD8-dissociated protein 1 OS=Mus musculus OX=10090 GN=Cand1 PE=1 SV=2	cullin associated and neddylation dissociated 1	CAND1	Cytoplasm	transcription regulator	0	0	312.402	36	29	323	29	1	1230	136.2	5.78	2625	29	0	1.037	0.957	0.357193	0.898077	100.7	81.6	109.5	100.8	104.4	116	96.4	81.5	109.2	1.16849e+08	9.46753e+07	1.27049e+08	1.17032e+08	1.21145e+08	1.34596e+08	1.11851e+08	9.47266e+07	1.2673e+08
Q6ZQ73	Cullin-associated NEDD8-dissociated protein 2 OS=Mus musculus OX=10090 GN=Cand2 PE=1 SV=2	cullin associated and neddylation dissociated 2 (putative)	CAND2	Nucleus	transcription regulator	0	0.055	2.049	3	1	1	1	1	1235	135.5	5.58	16	1	0
Q8VCF1	Soluble calcium-activated nucleotidase 1 OS=Mus musculus OX=10090 GN=Cant1 PE=2 SV=1	calcium activated nucleotidase 1	CANT1	Extracellular Space	enzyme	0	0.06	2.02	1	1	5	1	1	403	45.6	6.77	23	1	0	1.629	1.365	0.211909	0.024269	74.9	73.6	91	122	152.9	72.2	112.7	102.2	98.7	507490	499801	616428	829433	1.03739e+06	490497	767812	700480	672366
P35564	Calnexin OS=Mus musculus OX=10090 GN=Canx PE=1 SV=1	calnexin	CANX	Cytoplasm	other	1	0	602.533	46	24	934	24	1	591	67.2	4.64	10759	24	0	1.1	1.033	0.192975	0.358743	97.7	80.2	100	114.5	107.5	95.3	112.3	100.9	91.6	7.53893e+08	6.18597e+08	7.71224e+08	8.83274e+08	8.28622e+08	7.35181e+08	8.65936e+08	7.78091e+08	7.06873e+08
P40124	Adenylyl cyclase-associated protein 1 OS=Mus musculus OX=10090 GN=Cap1 PE=1 SV=4	cyclase associated actin cytoskeleton regulatory protein 1	CAP1	Plasma Membrane	other	0	0	566.235	66	25	848	25	1	474	51.5	7.52	10239	25	0	1.215	1.112	0.087074	0.328051	95.7	88.3	89.6	123.5	108.9	96.4	99.6	87.2	110.8	2.62175e+08	2.41538e+08	2.45341e+08	3.37767e+08	2.97872e+08	2.63911e+08	2.72542e+08	2.38431e+08	3.03105e+08
P24452	Macrophage-capping protein OS=Mus musculus OX=10090 GN=Capg PE=1 SV=2	capping actin protein, gelsolin like	CAPG	Nucleus	other	0	0	23.758	9	3	22	3	1	352	39.2	7.2	296	3	0	4.739	4.371	0.08481	0.02143	36.5	25.3	40.2	174.3	172.8	46.4	164.6	159.4	80.7	3.63105e+06	2.50437e+06	3.97506e+06	1.73128e+07	1.72037e+07	4.64132e+06	1.63134e+07	1.58734e+07	1.00893e+07
O35350	Calpain-1 catalytic subunit OS=Mus musculus OX=10090 GN=Capn1 PE=1 SV=1	calpain 1	CAPN1	Cytoplasm	peptidase	0	0	81.434	19	10	54	10	1	713	82.1	5.87	1004	10	0	1.265	1.146	0.109183	0.330283	85.6	80	96.9	108.2	145.6	100.2	98	86.7	98.8	3.8058e+07	3.55704e+07	4.3049e+07	4.8098e+07	6.47976e+07	4.46279e+07	4.37609e+07	3.86137e+07	4.40656e+07
O08529	Calpain-2 catalytic subunit OS=Mus musculus OX=10090 GN=Capn2 PE=1 SV=4	calpain 2	CAPN2	Cytoplasm	peptidase	0	0	147.587	31	13	128	13	1	700	79.8	4.96	1825	13	0	1.048	0.893	0.359342	0.403166	99	81.5	111.9	103.8	142.2	97.6	96.4	79.3	88.4	7.03562e+07	5.82967e+07	7.96417e+07	7.39743e+07	1.01171e+08	6.96765e+07	6.87961e+07	5.67667e+07	6.29886e+07
O08688	Calpain-5 OS=Mus musculus OX=10090 GN=Capn5 PE=1 SV=1	calpain 5	CAPN5	Cytoplasm	peptidase	0	0	126.121	23	11	124	11	1	640	72.9	7.36	1399	11	0	1.284	1.61	0.269344	0.137691	79.7	58.6	94	126.9	102.4	73.9	128.3	81.4	154.8	5.32423e+07	3.87569e+07	6.23599e+07	8.40244e+07	6.77054e+07	4.88592e+07	8.48332e+07	5.41214e+07	1.02299e+08
O88456	Calpain small subunit 1 OS=Mus musculus OX=10090 GN=Capns1 PE=1 SV=1	calpain small subunit 1	CAPNS1	Cytoplasm	peptidase	0	0	156.511	54	9	115	9	1	269	28.4	5.63	2917	9	0	1.326	1.161	0.057243	0.784133	87.1	79.8	107	115.4	109.4	115.6	101.1	74.5	110.1	3.57997e+07	3.28386e+07	4.38421e+07	4.72838e+07	4.49573e+07	4.74043e+07	4.13932e+07	3.06302e+07	4.51637e+07
Q60865	Caprin-1 OS=Mus musculus OX=10090 GN=Caprin1 PE=1 SV=2	cell cycle associated protein 1	CAPRIN1	Plasma Membrane	other	0	0	26.949	7	3	22	3	1	707	78.1	5.25	609	3	0	1.402	1.486	0.383461	0.33641	108	63.9	77	149.3	69.4	108	137.5	72.5	114.5	1.15324e+07	6.80718e+06	8.20494e+06	1.60073e+07	7.44879e+06	1.15337e+07	1.48023e+07	7.74274e+06	1.22651e+07
P47753	F-actin-capping protein subunit alpha-1 OS=Mus musculus OX=10090 GN=Capza1 PE=1 SV=4	capping actin protein of muscle Z-line subunit alpha 1	CAPZA1	Cytoplasm	other	0	0	47.835	22	4	50	3	1	286	32.9	5.55	892	4	0	2.286	1.952	0.175829	0.408498	50.1	56.2	114.3	82.8	147.8	128.5	109.7	54	156.6	6.77211e+06	7.67508e+06	1.53071e+07	1.13005e+07	2.06679e+07	1.75687e+07	1.46813e+07	7.26642e+06	2.12661e+07
P47754	F-actin-capping protein subunit alpha-2 OS=Mus musculus OX=10090 GN=Capza2 PE=1 SV=3	capping actin protein of muscle Z-line subunit alpha 2	CAPZA2	Cytoplasm	other	0	0	53.341	24	5	81	4	1	286	32.9	5.85	1582	5	1	1.495	1.138	0.137924	0.367495	70.2	103.6	82.2	90.7	143.3	122.8	92	101.6	93.5	5.2462e+07	7.75043e+07	6.13566e+07	6.77885e+07	1.06979e+08	9.17412e+07	6.87778e+07	7.63009e+07	6.98378e+07
P47757	F-actin-capping protein subunit beta OS=Mus musculus OX=10090 GN=Capzb PE=1 SV=3	capping actin protein of muscle Z-line subunit beta	CAPZB	Cytoplasm	other	0	0	122.362	50	10	153	10	1	277	31.3	5.74	3240	10	0	1.13	1.036	0.127769	0.482084	97.4	92.5	79.2	104.6	140.8	102.1	88.9	95.9	98.6	9.9682e+07	9.44869e+07	8.08219e+07	1.06783e+08	1.43662e+08	1.04205e+08	9.07507e+07	9.83864e+07	1.00819e+08
Q99N23	Carbonic anhydrase 15 OS=Mus musculus OX=10090 GN=Ca15 PE=1 SV=1	carbonic anhydrase 15	Car15	Extracellular Space	enzyme	0	0	201.228	42	11	484	11	1	324	35.5	6.79	8729	11	0	1.088	1.051	0.439237	0.331293	96.4	102.2	72.4	104.9	140.3	77.9	93.2	101.4	111.2	3.93349e+08	4.17233e+08	2.95215e+08	4.28529e+08	5.72046e+08	3.17502e+08	3.80106e+08	4.1367e+08	4.53321e+08
Q9WVG6	Histone-arginine methyltransferase CARM1 OS=Mus musculus OX=10090 GN=Carm1 PE=1 SV=2	coactivator associated arginine methyltransferase 1	CARM1	Nucleus	transcription regulator	0	0.027	2.685	4	1	1	1	1	608	65.8	6.77	0	1	0	0.761	1.098	0.967717	0.556422	145	18.4	106.1	80.7	63.4	120.1	116.5	66.9	182.8	234658	29340.8	169975	130300	100441	190312	193270	105920	291595
Q6EDY6	F-actin-uncapping protein LRRC16A OS=Mus musculus OX=10090 GN=Carmil1 PE=1 SV=2	capping protein regulator and myosin 1 linker 1	CARMIL1	Cytoplasm	enzyme	0	0	37.359	7	5	34	5	1	1374	151.8	7.8	277	5	0	1.54	1.357	0.389987	0.833481	74.6	126.7	70.4	114.9	142.8	85.1	101.2	108.6	75.8	3.63976e+06	6.16477e+06	3.53876e+06	5.61453e+06	7.01394e+06	4.17818e+06	4.93235e+06	5.32463e+06	3.70045e+06
Q3V3V9	Capping protein, Arp2/3 and myosin-I linker protein 2 OS=Mus musculus OX=10090 GN=Carmil2 PE=1 SV=2	capping protein regulator and myosin 1 linker 2	CARMIL2	Plasma Membrane	other	0	0.104	1.613	1	1	13	1	1	1296	141.3	7.18	44	1	0
Q6P2L7	Protein CASC4 OS=Mus musculus OX=10090 GN=Casc4 PE=1 SV=1	cancer susceptibility 4	CASC4	Cytoplasm	other	1	0.089	1.742	5	1	6	1	1	435	49.4	5.45	0	1	0
Q7TN73	N-acetylneuraminate 9-O-acetyltransferase OS=Mus musculus OX=10090 GN=Casd1 PE=2 SV=1	CAS1 domain containing 1	CASD1	Cytoplasm	enzyme	12	0.05	2.108	1	1	12	1	1	797	91.5	8.76	226	1	0
O70589	Peripheral plasma membrane protein CASK OS=Mus musculus OX=10090 GN=Cask PE=1 SV=2	calcium/calmodulin dependent serine protein kinase	CASK	Plasma Membrane	kinase	0	0	153.136	23	18	255	18	1	926	105	6.43	2633	18	0	0.996	0.967	0.812726	0.885575	105.1	83.4	118.3	104.7	69.1	119.3	101.7	81.2	117.2	2.00797e+08	1.59203e+08	2.26507e+08	1.9998e+08	1.32237e+08	2.2798e+08	1.94101e+08	1.55204e+08	2.23917e+08
Q8VHK1	Caskin-2 OS=Mus musculus OX=10090 GN=Caskin2 PE=1 SV=3	CASK interacting protein 2	CASKIN2	Cytoplasm	other	0	0.016	3.167	1	1	4	1	1	1201	126.7	7.39	0	1	0	0.95	0.905	0.760027	0.718255	96.7	86.6	111.7	62	175.2	91.8	69.2	119.3	87.5	916813	809379	1.05409e+06	583527	1.6393e+06	864223	648048	1.12099e+06	822995
O08738	Caspase-6 OS=Mus musculus OX=10090 GN=Casp6 PE=1 SV=1	caspase 6	CASP6	Cytoplasm	peptidase	0	0	19.906	7	3	46	3	1	276	31.6	6.89	419	3	0	1.363	1.494	0.052993	0.125334	98.4	71.1	76.9	103.4	122.5	104.8	120.8	87.4	114.9	7.64018e+06	5.52161e+06	5.96633e+06	8.02962e+06	9.50216e+06	8.137e+06	9.38478e+06	6.81421e+06	8.91422e+06
Q9QY96	Extracellular calcium-sensing receptor OS=Mus musculus OX=10090 GN=Casr PE=1 SV=2	calcium sensing receptor	CASR	Plasma Membrane	G-protein coupled receptor	7	0	112.534	15	11	121	11	1	1079	120.8	6.07	1961	11	0	1.826	2.199	0.050668	0.108352	92.1	57.6	57.4	123.6	95.7	105.1	161.3	80.5	126.6	4.30194e+07	2.69735e+07	2.68429e+07	5.77625e+07	4.48127e+07	4.91121e+07	7.5479e+07	3.76257e+07	5.96763e+07
P24270	Catalase OS=Mus musculus OX=10090 GN=Cat PE=1 SV=4	catalase	CAT	Cytoplasm	enzyme	0	0	777.837	76	34	1161	34	1	527	59.8	7.88	20319	34	0	1.344	1.602	0.096668	0.093367	72.9	68.6	93.4	105.1	97.9	89.5	116.8	94.8	161.1	6.55717e+08	6.17091e+08	8.40182e+08	9.45117e+08	8.83091e+08	8.05712e+08	1.05055e+09	8.52572e+08	1.44932e+09
P49817	Caveolin-1 OS=Mus musculus OX=10090 GN=Cav1 PE=1 SV=1	caveolin 1	CAV1	Plasma Membrane	transmembrane receptor	1	0	69.88	39	7	58	7	1	178	20.5	6.02	1226	7	0	1.237	1.227	0.597523	0.321416	99.9	58.6	99.2	136.6	50.1	122.7	121.6	76.8	134.6	9.08827e+07	5.33034e+07	9.02548e+07	1.24375e+08	4.56905e+07	1.11802e+08	1.10701e+08	6.99211e+07	1.22484e+08
O54724	Caveolae-associated protein 1 OS=Mus musculus OX=10090 GN=Cavin1 PE=1 SV=1	caveolae associated protein 1	CAVIN1	Nucleus	transcription regulator	0	0	94.063	23	7	87	7	1	392	43.9	5.52	1344	7	0	1.066	0.973	0.777994	0.536586	86.8	100.4	115.6	69.8	107	147.7	67	97.7	108	4.53039e+07	5.23771e+07	6.02049e+07	3.63911e+07	5.57347e+07	7.69851e+07	3.49167e+07	5.0923e+07	5.6292e+07
Q63918	Caveolae-associated protein 2 OS=Mus musculus OX=10090 GN=Cavin2 PE=1 SV=3	caveolae associated protein 2	CAVIN2	Plasma Membrane	other	0	0	12.813	9	4	45	4	1	418	46.7	5.21	239	4	0	1.228	0.935	0.533293	0.411847	84.7	119.7	95.6	82.3	140.9	117.5	66.6	103.2	89.4	1.84182e+07	2.61019e+07	2.08279e+07	1.78656e+07	3.05922e+07	2.55526e+07	1.44495e+07	2.24014e+07	1.94957e+07
P48758	Carbonyl reductase [NADPH] 1 OS=Mus musculus OX=10090 GN=Cbr1 PE=1 SV=3	carbonyl reductase 1	CBR1	Cytoplasm	enzyme	0	0	45.204	26	7	120	7	1	277	30.6	8.31	1744	7	0	1.162	1.244	0.139147	0.37292	101.8	88.6	72	124.9	103	99.4	122.5	77.6	110.2	6.21062e+07	5.44094e+07	4.40874e+07	7.61808e+07	6.32259e+07	6.07795e+07	7.48709e+07	4.74007e+07	6.72287e+07
Q91VT4	Carbonyl reductase family member 4 OS=Mus musculus OX=10090 GN=Cbr4 PE=1 SV=2	carbonyl reductase 4	CBR4	Cytoplasm	enzyme	0	0	81.644	23	5	93	5	1	236	25.4	9.69	1967	5	0	0.983	1.065	0.950926	0.789933	110.7	105.3	78.4	109.7	103.6	83.6	120.4	112.2	76.2	4.82026e+07	4.58545e+07	3.41424e+07	4.77441e+07	4.51297e+07	3.6458e+07	5.24418e+07	4.88536e+07	3.31718e+07
Q91WT9	Cystathionine beta-synthase OS=Mus musculus OX=10090 GN=Cbs PE=1 SV=3	cystathionine beta-synthase	CBS/CBSL	Cytoplasm	enzyme	0	0	289.423	66	22	420	22	1	561	61.5	6.48	4511	22	0	0.924	0.85	0.981193	0.79158	111.2	125.5	68.2	102.8	104.1	99.3	94.5	111.4	82.8	2.80554e+08	3.16567e+08	1.72022e+08	2.59437e+08	2.62698e+08	2.50424e+08	2.39194e+08	2.80911e+08	2.08863e+08
Q8VEH6	COBW domain-containing protein 1 OS=Mus musculus OX=10090 GN=Cbwd1 PE=1 SV=1	COBW domain containing 1	CBWD1	Other	other	0	0	11.909	9	2	19	2	1	393	43.7	4.89	54	2	0	1.109	0.992	0.778591	0.890142	140	60.4	83.3	159.7	92.4	64.8	151.9	82.7	64.8	251919	108687	149969	287304	166279	116684	273320	148777	116522
Q32MG2	Spermatid-associated protein OS=Mus musculus OX=10090 GN=Spert PE=1 SV=2	chibby family member 2	CBY2	Cytoplasm	other	0	0.07	1.916	9	1	8	1	1	446	51.8	6.74	0	1	0	0.657	1.681	0.372654	0.574361	87.4		101.7	103.7	50.3	61.9	158.5	18.1	318.4	2.65338e+06		2.73042e+06	2.79275e+06	1.34965e+06	2.08366e+06	4.58603e+06	492382	8.55299e+06
Q8K1A6	Coiled-coil and C2 domain-containing protein 1A OS=Mus musculus OX=10090 GN=Cc2d1a PE=1 SV=2	coiled-coil and C2 domain containing 1A	CC2D1A	Cytoplasm	transcription regulator	0	0.001	6.769	4	2	3	2	1	943	103.6	7.84	16	2	0	0.885	0.858	0.902221	0.663754	139.6	61.3	115	144.4	56.2	101.8	104.3	98.7	78.6	1.57062e+06	714075	1.29319e+06	1.66923e+06	629620	1.15054e+06	1.17293e+06	1.1225e+06	1.0731e+06
Q8BRN9	Coiled-coil and C2 domain-containing protein 1B OS=Mus musculus OX=10090 GN=Cc2d1b PE=1 SV=1	coiled-coil and C2 domain containing 1B	CC2D1B	Nucleus	transcription regulator	0	0.001	6.872	2	2	18	2	1	848	93	5.41	252	2	0	1.278	1.197	0.863279	0.924375	82	131.4	84.7	108.3	119.3	81.3	104	101.4	87.6	3.40813e+06	5.45073e+06	3.55249e+06	4.4953e+06	4.9602e+06	3.39451e+06	4.32196e+06	4.2276e+06	3.66591e+06
Q8VDP4	Cell cycle and apoptosis regulator protein 2 OS=Mus musculus OX=10090 GN=Ccar2 PE=1 SV=2	cell cycle and apoptosis regulator 2	CCAR2	Cytoplasm	peptidase	0	0	27.549	10	5	25	5	1	922	102.9	5.25	262	5	0	1.151	1.18	0.3468	0.243156	75	95	66.7	86.2	217	79.2	88.5	107	85.4	5.22962e+06	6.52299e+06	4.62294e+06	5.90188e+06	1.48776e+07	5.44918e+06	6.05085e+06	7.34411e+06	5.91453e+06
A0AUP1	Coiled-coil domain-containing protein 112 OS=Mus musculus OX=10090 GN=Ccdc112 PE=2 SV=2	coiled-coil domain containing 112	CCDC112	Extracellular Space	other	0	0.046	2.213	5	1	2	1	1	442	52.7	9.6	0	1	0
Q8CDI7	Coiled-coil domain-containing protein 150 OS=Mus musculus OX=10090 GN=Ccdc150 PE=2 SV=2	coiled-coil domain containing 150	CCDC150	Other	other	0	0.084	1.796	2	1	1	1	1	1110	128.4	6.93	0	1	0	1.916	present in sham only	0.214554		119.7	115.1	95.7	263.3	220.6	85.6				673919	879281	502820	1.38343e+06	1.15865e+06	449458
Q8C9S4	Coiled-coil domain-containing protein 186 OS=Mus musculus OX=10090 GN=Ccdc186 PE=1 SV=2	coiled-coil domain containing 186	CCDC186	Other	other	0	0.008	4.272	1	1	4	1	1	917	104.8	5.53	0	1	0	1.125	1.313	0.822364	0.523376	76.2	90.4	116.1	104.1	86.3	101.6	118.6	75.9	130.8	185416	221932	282904	253364	209998	248116	288759	185492	318464
Q9JIG7	Coiled-coil domain-containing protein 22 OS=Mus musculus OX=10090 GN=Ccdc22 PE=1 SV=1	coiled-coil domain containing 22	CCDC22	Cytoplasm	other	0	0	110.464	29	13	136	13	1	627	70.8	6.01	1550	13	0	1.113	1.216	0.502007	0.985508	71.9	122.2	73.9	82.2	203	79.8	89.8	97.6	79.6	2.09106e+07	3.55358e+07	2.14789e+07	2.39012e+07	5.90345e+07	2.31959e+07	2.61063e+07	2.84879e+07	2.31616e+07
Q8BS39	Coiled-coil domain-containing protein 32 OS=Mus musculus OX=10090 GN=Ccdc32 PE=2 SV=2	coiled-coil domain containing 32	CCDC32	Other	other	0	0.042	2.299	7	1	1	1	1	179	19.9	4.84	0	1	0	1.234	0.818	0.620618	0.182941	93.6	112.8	100.2	81.2	127.2	123.6	101.9	81.9	77.5	5.85781e+06	7.08347e+06	6.27644e+06	5.07627e+06	7.95599e+06	7.78165e+06	6.37703e+06	5.13672e+06	4.84978e+06
Q9D024	Coiled-coil domain-containing protein 47 OS=Mus musculus OX=10090 GN=Ccdc47 PE=1 SV=2	coiled-coil domain containing 47	CCDC47	Extracellular Space	other	0	0	54.616	22	7	64	7	1	483	55.8	4.84	893	7	0	1.425	1.546	0.013895	0.030247	75.5	71.9	91.5	102.2	109.4	107.6	116.7	98	127.1	2.06898e+07	1.9668e+07	2.50472e+07	2.80015e+07	2.99392e+07	2.94532e+07	3.19671e+07	2.68186e+07	3.47732e+07
Q8R3Q6	Coiled-coil domain-containing protein 58 OS=Mus musculus OX=10090 GN=Ccdc58 PE=1 SV=1	coiled-coil domain containing 58	CCDC58	Cytoplasm	other	0	0	14.908	12	1	5	1	1	144	16.7	8.16	97	1	0	0.709	0.871	0.299093	0.260612	114.1	136.3	109.3	80.9	135.7	26.8	99.4	122.4	75.2	4.71794e+06	5.65116e+06	4.59939e+06	3.34404e+06	5.63195e+06	2.29708e+06	4.13519e+06	5.22935e+06	3.19989e+06
D3YZP9	Coiled-coil domain-containing protein 6 OS=Mus musculus OX=10090 GN=Ccdc6 PE=1 SV=1	coiled-coil domain containing 6	CCDC6	Cytoplasm	other	0	0	15.309	4	1	19	1	1	469	52.9	7.34	177	1	0	1.002	0.92	0.75943	0.787548	72.8	97.8	142.7	98.1	106.5	87.9	89.4	90	114.8	196237	263158	384508	263800	290799	238923	240559	242517	311927
E9Q6B2	Coiled-coil domain-containing protein 85C OS=Mus musculus OX=10090 GN=Ccdc85c PE=1 SV=1	coiled-coil domain containing 85C	CCDC85C	Plasma Membrane	other	0	0.003	5.239	2	1	4	1	1	420	45.3	6.96	68	1	0	0.916	0.863	0.283996	0.059993	121.3	102.2	111.6	102.3	65.6	111.4	96.3	89.3	100	162956	137307	149799	137950	87959	150203	132749	119935	134635
Q7TQK5	Coiled-coil domain-containing protein 93 OS=Mus musculus OX=10090 GN=Ccdc93 PE=1 SV=1	coiled-coil domain containing 93	CCDC93	Extracellular Space	other	0	0	34.988	16	7	41	7	1	629	72.6	8.29	409	7	0	0.994	1.047	0.739299	0.860814	76.3	113.3	100.2	75.6	136.8	99.7	79.8	104.9	113.4	7.67167e+06	1.11524e+07	9.87466e+06	7.71561e+06	1.35432e+07	9.81032e+06	8.12438e+06	1.03426e+07	1.11951e+07
O08786	Cholecystokinin receptor type A OS=Mus musculus OX=10090 GN=Cckar PE=1 SV=1	cholecystokinin A receptor	CCKAR	Plasma Membrane	G-protein coupled receptor	7	0.004	4.981	6	2	3	2	1	436	48.4	9.13	17	2	0	1.263	0.927	0.076805	0.541747	92.4	72.7	96	99.4	116.6	135.7	84.2	117.3	85.6	1.40238e+06	1.08772e+06	1.43125e+06	1.49866e+06	1.77231e+06	2.02151e+06	1.27858e+06	1.76596e+06	1.2858e+06
P27784	C-C motif chemokine 6 OS=Mus musculus OX=10090 GN=Ccl6 PE=1 SV=1	chemokine (C-C motif) ligand 6	Ccl6	Extracellular Space	cytokine	1	0	15.489	18	1	15	1	1	116	13	9.33	48	1	0	1.172	2.233	0.173462	0.088963	76.5	27.5	66.6	124.2	78	76.1	148.7	83.6	218.8	806077	291199	701440	1.30933e+06	831437	815398	1.59428e+06	885632	2.31062e+06
P51670	C-C motif chemokine 9 OS=Mus musculus OX=10090 GN=Ccl9 PE=1 SV=1	chemokine (C-C motif) ligand 9	Ccl9	Extracellular Space	cytokine	0	0.001	9.269	17	1	2	1	1	122	13.9	8.73	0	1	0	1.581	2.471	0.087552	0.198047	50.2	25.2	69.6	90.2	70.4	79.4	124	65.1	325.9	465609	235241	645711	837303	653410	738096	1.15131e+06	606322	3.02397e+06
P18406	Protein CYR61 OS=Mus musculus OX=10090 GN=Cyr61 PE=1 SV=1	cellular communication network factor 1	CCN1	Extracellular Space	other	0	0	30.293	12	4	11	4	1	379	41.7	8.12	18	4	0	41.394	29.942	0.000549	0.02658	4.3	7.6	2.4	201.8	143.9	176.1	176.9	59.7	127.4	229569	402151	124249	1.06892e+07	7.6055e+06	9.37893e+06	9.36978e+06	3.2129e+06	7.27001e+06
P29268	Connective tissue growth factor OS=Mus musculus OX=10090 GN=Ctgf PE=2 SV=3	cellular communication network factor 2	CCN2	Extracellular Space	growth factor	0	0.016	3.28	3	1	2	1	1	348	37.8	7.81	26	1	0
Q8BGU5	Cyclin-Y OS=Mus musculus OX=10090 GN=Ccny PE=1 SV=1	cyclin Y	CCNY	Nucleus	other	0	0	109.337	19	6	221	6	1	341	39.4	7.2	2729	6	0	0.896	0.795	0.35167	0.551485	96.2	113.9	110.2	77.7	109.7	98.7	82.9	123	87.6	5.74361e+07	6.80398e+07	6.58386e+07	4.64561e+07	6.55377e+07	5.90451e+07	4.97082e+07	7.34564e+07	5.23022e+07
O35457	C-C chemokine receptor-like 2 OS=Mus musculus OX=10090 GN=Ccrl2 PE=1 SV=2	C-C motif chemokine receptor like 2	CCRL2	Plasma Membrane	G-protein coupled receptor	7	0.009	3.992	4	1	2	1	1	360	40.7	7.62	13	1	0	0.925	0.403	0.2278	0.061398	130.6	120.1	121.1	88.7	112	124.3	43.7	110.7	48.8	2.78596e+06	2.56285e+06	2.58306e+06	1.8917e+06	2.3894e+06	2.65085e+06	1.11096e+06	2.36239e+06	1.24881e+06
Q9WU84	Copper chaperone for superoxide dismutase OS=Mus musculus OX=10090 GN=Ccs PE=1 SV=1	copper chaperone for superoxide dismutase	CCS	Cytoplasm	enzyme	0	0	20.301	13	3	17	3	1	274	28.9	6.1	778	3	0	0.902	0.798	0.238406	0.380925	129.9	109.6	93.7	98.9	102.8	74.7	87.5	116.9	85.9	3.82005e+08	3.22603e+08	2.75751e+08	2.90834e+08	3.02308e+08	2.21907e+08	2.57175e+08	3.44254e+08	2.52714e+08
P80314	T-complex protein 1 subunit beta OS=Mus musculus OX=10090 GN=Cct2 PE=1 SV=4	chaperonin containing TCP1 subunit 2	CCT2	Cytoplasm	kinase	0	0	440.265	67	28	467	28	1	535	57.4	6.4	8819	28	0	1.363	1.265	0.151353	0.122663	79	96.4	68.2	107.7	160	92.7	104.1	92	99.9	2.16321e+08	2.6385e+08	1.86681e+08	2.94746e+08	4.37771e+08	2.54251e+08	2.84863e+08	2.51646e+08	2.73774e+08
P80318	T-complex protein 1 subunit gamma OS=Mus musculus OX=10090 GN=Cct3 PE=1 SV=1	chaperonin containing TCP1 subunit 3	CCT3	Cytoplasm	other	0	0	397.083	61	27	590	27	1	545	60.6	6.7	11880	27	0	1.316	1.199	0.168161	0.299701	74.6	99.4	79.4	104.5	161.2	96.9	101.1	95.2	87.6	3.94629e+08	5.25632e+08	4.20008e+08	5.52889e+08	8.52444e+08	5.12854e+08	5.34714e+08	5.03716e+08	4.6391e+08
P80315	T-complex protein 1 subunit delta OS=Mus musculus OX=10090 GN=Cct4 PE=1 SV=3	chaperonin containing TCP1 subunit 4	CCT4	Cytoplasm	other	0	0	451.255	72	31	770	30	1	539	58	8.02	13680	31	1	0.993	0.965	0.479895	0.370762	89.1	103.3	96.8	96.1	153.3	88.5	95.4	93.4	84.2	4.4631e+08	5.18167e+08	4.85083e+08	4.81844e+08	7.68018e+08	4.4334e+08	4.78205e+08	4.67978e+08	4.22082e+08
P80316	T-complex protein 1 subunit epsilon OS=Mus musculus OX=10090 GN=Cct5 PE=1 SV=1	chaperonin containing TCP1 subunit 5	CCT5	Cytoplasm	other	0	0	299.886	55	22	476	21	1	541	59.6	6.02	8348	22	0	1.296	1.148	0.06669	0.14562	80.5	89.8	82.4	106.8	140.7	100.8	115.4	88.9	94.6	1.29726e+08	1.44744e+08	1.32904e+08	1.72102e+08	2.26859e+08	1.62435e+08	1.86031e+08	1.43521e+08	1.52535e+08
P80317	T-complex protein 1 subunit zeta OS=Mus musculus OX=10090 GN=Cct6a PE=1 SV=3	chaperonin containing TCP1 subunit 6A	CCT6A	Cytoplasm	other	0	0	382.061	53	24	597	24	1	531	58	7.08	7544	24	0	1.366	1.168	0.175123	0.529091	81.8	99.9	82.9	113.3	147.9	90.6	105.2	96.8	81.4	2.63024e+08	3.21643e+08	2.66301e+08	3.65088e+08	4.75212e+08	2.91062e+08	3.38221e+08	3.11002e+08	2.6158e+08
P80313	T-complex protein 1 subunit eta OS=Mus musculus OX=10090 GN=Cct7 PE=1 SV=1	chaperonin containing TCP1 subunit 7	CCT7	Cytoplasm	other	0	0	418.217	67	28	824	28	1	544	59.6	7.84	12537	28	0	1.037	0.929	0.606267	0.13979	99.5	103.7	98	103.1	135.1	86.9	98.7	92.4	82.6	5.70289e+08	5.94615e+08	5.61602e+08	5.91029e+08	7.74171e+08	4.98369e+08	5.65983e+08	5.3015e+08	4.73999e+08
P42932	T-complex protein 1 subunit theta OS=Mus musculus OX=10090 GN=Cct8 PE=1 SV=3	chaperonin containing TCP1 subunit 8	CCT8	Cytoplasm	enzyme	0	0	390.881	53	27	479	27	1	548	59.5	5.62	11062	27	0	1.208	1.146	0.122078	0.181746	82.2	96.3	85.1	100.7	141	102.8	104	90.3	97.6	2.82107e+08	3.29837e+08	2.92172e+08	3.45139e+08	4.83016e+08	3.52976e+08	3.55566e+08	3.08848e+08	3.3416e+08
Q8C1Y8	Vacuolar fusion protein CCZ1 homolog OS=Mus musculus OX=10090 GN=Ccz1 PE=1 SV=1	CCZ1 homolog B, vacuolar protein trafficking and biogenesis associated	CCZ1/CCZ1B	Cytoplasm	other	0	0	14.972	6	2	3	2	1	480	55.5	6.02	23	2	0	1.885	1.167	0.014909	0.278684	78.3	84	46.8	114	147.6	151.6	91.4	68.7	117.6	1.83208e+06	1.95627e+06	1.547e+06	2.65552e+06	3.48221e+06	3.59983e+06	2.12801e+06	1.59952e+06	2.7454e+06
P10810	Monocyte differentiation antigen CD14 OS=Mus musculus OX=10090 GN=Cd14 PE=1 SV=1	CD14 molecule	CD14	Plasma Membrane	transmembrane receptor	0	0	141.787	35	10	116	10	1	366	39.2	5.21	2273	10	0	1.292	1.443	0.306314	0.106635	76.9	76.8	103.8	88.2	99.3	106.9	111	99.2	137.9	5.45861e+07	5.45622e+07	7.36205e+07	6.26327e+07	7.08341e+07	7.58699e+07	7.88266e+07	7.04476e+07	9.78427e+07
O35566	CD151 antigen OS=Mus musculus OX=10090 GN=Cd151 PE=1 SV=2	CD151 molecule (Raph blood group)	CD151	Plasma Membrane	other	4	0	17.844	9	2	9	2	1	253	28.2	7.47	93	2	0	1.234	2.002	0.393704	0.232237	87.8	57.1	83	110.1	64.3	102.4	166.2	54.9	174.2	586724	383638	570820	737469	431200	684428	1.11368e+06	385289	1.16469e+06
Q2VLH6	Scavenger receptor cysteine-rich type 1 protein M130 OS=Mus musculus OX=10090 GN=Cd163 PE=1 SV=2	CD163 molecule	CD163	Plasma Membrane	transmembrane receptor	2	0.019	3.018	1	1	1	1	1	1121	120.8	6.24	0	1	0	0.981	1.144	0.560052	0.129449	82.1	89.8	99	128.1	83.3	88.1	99	127.8	102.8	1.72864e+06	1.88835e+06	2.07876e+06	2.74416e+06	1.75543e+06	1.85119e+06	2.0936e+06	2.68685e+06	2.17412e+06
Q8R2S8	CD177 antigen OS=Mus musculus OX=10090 GN=Cd177 PE=2 SV=1	CD177 molecule	CD177	Cytoplasm	other	0	0	163.516	30	18	83	18	1	817	87	5.67	1206	18	0	5.057	6.619	0.044535	0.024536	22.4	32.5	12.4	113.2	207.8	80.7	148.2	82.6	200	1.88994e+07	2.74153e+07	1.06544e+07	9.53224e+07	1.74995e+08	6.81965e+07	1.24764e+08	6.99117e+07	1.68384e+08
Q62192	CD180 antigen OS=Mus musculus OX=10090 GN=Cd180 PE=1 SV=2	CD180 molecule	CD180	Plasma Membrane	other	1	0	42.185	12	4	66	4	1	661	74.3	5.88	309	4	0	1.39	1.312	0.639138	0.434648	80.6	21.6	138.8	61.1	112	127.7	105.7	76.1	176.5	2.29226e+06	603470	3.88801e+06	1.70878e+06	3.13605e+06	3.59081e+06	2.95751e+06	2.13388e+06	4.95814e+06
O54901	OX-2 membrane glycoprotein OS=Mus musculus OX=10090 GN=Cd200 PE=1 SV=1	CD200 molecule	CD200	Plasma Membrane	other	1	0	62.197	17	6	128	6	1	278	31.2	8.79	1550	6	0	1.343	1.055	0.022672	0.423953	94.9	86.9	87.8	117.9	120.9	101.5	110.8	86.7	92.6	1.15051e+08	1.05517e+08	1.06425e+08	1.432e+08	1.46615e+08	1.23217e+08	1.34779e+08	1.05196e+08	1.12345e+08
Q8K4F0	CD226 antigen OS=Mus musculus OX=10090 GN=Cd226 PE=2 SV=1	CD226 molecule	CD226	Plasma Membrane	other	1	0	13.91	5	1	3	1	1	333	38	9.03	103	1	0	3.79	4.381	0.450601	0.389929			25.8	97.8	290.7	72.9	113.1	63.5	236.2			419180	1.59615e+06	4.77301e+06	1.18303e+06	1.86852e+06	1.03091e+06	3.86845e+06
Q9EP73	Programmed cell death 1 ligand 1 OS=Mus musculus OX=10090 GN=Cd274 PE=1 SV=1	CD274 molecule	CD274	Plasma Membrane	enzyme	1	0.016	3.197	4	1	1	1	1	290	32.8	6.23	14	1	0	1.24	1.413	0.775023	0.517899	87.4	62.2	123.2	108.3	65.6	121.3	140	68.6	123.5	2.88462e+06	2.0964e+06	4.05627e+06	3.57416e+06	2.16932e+06	4.02703e+06	4.60812e+06	2.29165e+06	4.07236e+06
Q9JLQ0	CD2-associated protein OS=Mus musculus OX=10090 GN=Cd2ap PE=1 SV=3	CD2 associated protein	CD2AP	Cytoplasm	other	0	0	67.231	13	8	68	8	1	637	70.4	6.38	798	8	0	0.937	1.04	0.796275	0.541395	74.2	104.6	109.5	88.6	98	112.5	108.8	110.3	93.7	1.10899e+07	1.54908e+07	1.62562e+07	1.32179e+07	1.44721e+07	1.67612e+07	1.61092e+07	1.62546e+07	1.41005e+07
Q1ERP8	CMRF35-like molecule 9 OS=Mus musculus OX=10090 GN=Cd300lg PE=1 SV=1	CD300 molecule like family member g	CD300LG	Plasma Membrane	other	1	0	27.551	12	2	11	2	1	331	36.7	5.85	370	2	0	0.73	0.393	0.441357	0.131861	100.4	95.8	262	70.7	73.4	156.6	39.5	70.5	31.1	1.81855e+06	2.12097e+06	4.7324e+06	1.27555e+06	1.66232e+06	2.83145e+06	1.05906e+06	1.49687e+06	673726
Q9DCG2	CD302 antigen OS=Mus musculus OX=10090 GN=Cd302 PE=1 SV=2	CD302 molecule	CD302	Plasma Membrane	transmembrane receptor	1	0.003	5.281	7	1	3	1	1	228	25.4	4.61	17	1	0	Present in 4h only	Present in 8h only							503.3			396.7						5.64094e+06			4.44707e+06
Q64314	Hematopoietic progenitor cell antigen CD34 OS=Mus musculus OX=10090 GN=Cd34 PE=1 SV=1	CD34 molecule	CD34	Plasma Membrane	other	1	0	53.009	15	4	36	4	1	382	41	5.3	455	4	0	1.157	0.823	0.998045	0.405364	110.2	87.5	113.1	127.5	55	128.1	90.7	79.8	108.1	1.36249e+07	1.08306e+07	1.40012e+07	1.58025e+07	6.83355e+06	1.58597e+07	1.12577e+07	9.90568e+06	1.35077e+07
Q08857	Platelet glycoprotein 4 OS=Mus musculus OX=10090 GN=Cd36 PE=1 SV=2	CD36 molecule	CD36	Plasma Membrane	transmembrane receptor	2	0	250.456	31	17	607	16	1	472	52.7	8.35	10476	17	1	1.173	1.169	0.048371	0.098361	91.7	78.9	93.5	107.6	98.4	116.2	113.8	92.8	107.2	7.75994e+08	6.67601e+08	7.91835e+08	9.10233e+08	8.33117e+08	9.83602e+08	9.62782e+08	7.8553e+08	9.07093e+08
P56528	ADP-ribosyl cyclase/cyclic ADP-ribose hydrolase 1 OS=Mus musculus OX=10090 GN=Cd38 PE=1 SV=2	CD38 molecule	CD38	Plasma Membrane	enzyme	1	0	260.253	58	12	548	12	1	304	34.4	8.29	7097	12	0	1.104	1.095	0.215215	0.256618	95.2	77.2	100.3	93.5	105.1	118.7	113.5	92.1	104.2	3.16297e+08	2.55583e+08	3.32853e+08	3.10121e+08	3.47432e+08	3.926e+08	3.771e+08	3.05004e+08	3.44626e+08
P15379	CD44 antigen OS=Mus musculus OX=10090 GN=Cd44 PE=1 SV=3	CD44 molecule (Indian blood group)	CD44	Plasma Membrane	other	1	0	20.832	3	2	33	2	1	778	85.6	4.96	832	2	0	2.113	2.516	0.081988	0.014224	39.5	48.6	50.8	102.7	184.2	77.1	122.3	103.1	171.7	1.36264e+07	1.67509e+07	1.75059e+07	3.56468e+07	6.35865e+07	2.65857e+07	4.21756e+07	3.55393e+07	5.91486e+07
Q61735	Leukocyte surface antigen CD47 OS=Mus musculus OX=10090 GN=Cd47 PE=1 SV=2	CD47 molecule	CD47	Plasma Membrane	transmembrane receptor	5	0	85.136	9	2	542	2	1	303	33.1	8.63	21467	2	0	1.074	1.018	0.484003	0.618511	97.4	103	90.8	104.6	113.7	90.5	107.4	99.1	93.4	5.15206e+08	5.44641e+08	4.79922e+08	5.53022e+08	6.01565e+08	4.78877e+08	5.68031e+08	5.24061e+08	4.93957e+08
P18181	CD48 antigen OS=Mus musculus OX=10090 GN=Cd48 PE=1 SV=1	CD48 molecule	CD48	Plasma Membrane	other	0	0	20.146	13	3	17	3	1	240	27.4	7.69	157	3	0	1.065	1.271	0.969475	0.442121	75.1	84.7	127.2	83.6	90.2	111	107.7	107.4	113.1	8.12619e+06	9.18328e+06	1.37424e+07	9.0523e+06	9.74164e+06	1.1997e+07	1.16506e+07	1.16045e+07	1.22385e+07
O55186	CD59A glycoprotein OS=Mus musculus OX=10090 GN=Cd59a PE=2 SV=1	CD59a antigen	Cd59a	Plasma Membrane	other	1	0	65.509	23	3	95	3	1	123	13.6	7.47	1355	3	0	1.041	0.895	0.91769	0.3303	106.1	120.2	85.1	110.5	123.4	82.7	78.7	98.3	95	5.33477e+07	6.03019e+07	4.28272e+07	5.54461e+07	6.18699e+07	4.15778e+07	3.9517e+07	4.94281e+07	4.76534e+07
P41731	CD63 antigen OS=Mus musculus OX=10090 GN=Cd63 PE=1 SV=2	CD63 molecule	CD63	Plasma Membrane	other	4	0	11.165	4	1	18	1	1	238	25.7	6.98	237	1	0	0.705	0.855	0.75043	0.859155	120.9	31.8	180.7	85.2	4	176.7	103.4	32.8	164.5	1.83711e+07	5.04683e+06	2.76101e+07	1.29153e+07	1.14828e+06	2.67814e+07	1.56797e+07	5.26044e+06	2.49936e+07
P31996	Macrosialin OS=Mus musculus OX=10090 GN=Cd68 PE=1 SV=1	CD68 molecule	CD68	Plasma Membrane	other	1	0.012	3.697	3	1	14	1	1	326	34.8	8.85	125	1	0	1.003	1.689	0.420355	0.008349	52.6	86.6	77.4	67.7	130.3	77.6	124.7	152.2	130.8	4.12579e+06	6.86522e+06	6.08411e+06	5.32355e+06	1.03184e+07	6.15369e+06	9.76148e+06	1.19104e+07	1.02332e+07
P04441	H-2 class II histocompatibility antigen gamma chain OS=Mus musculus OX=10090 GN=Cd74 PE=1 SV=3	CD74 molecule	CD74	Plasma Membrane	transmembrane receptor	1	0.001	6.201	7	2	10	2	1	279	31.5	8.34	26	2	0
P35762	CD81 antigen OS=Mus musculus OX=10090 GN=Cd81 PE=1 SV=2	CD81 molecule	CD81	Plasma Membrane	other	4	0	265.809	31	5	424	5	1	236	25.8	5.83	8235	5	0	0.95	0.983	0.526921	0.610116	108.4	55.4	105.9	100.7	82.7	133.7	104.1	70.3	138.8	4.44179e+08	2.2669e+08	4.34136e+08	4.12305e+08	3.38577e+08	5.47516e+08	4.26411e+08	2.89549e+08	5.68428e+08
P40237	CD82 antigen OS=Mus musculus OX=10090 GN=Cd82 PE=1 SV=1	CD82 molecule	CD82	Plasma Membrane	other	4	0	18.105	8	2	42	2	1	266	29.6	5.02	923	2	0	1.118	1.562	0.674336	0.289599	109	72.3	77.8	156.4	58.2	87	140.4	77.3	121.6	6.43335e+07	4.26304e+07	4.5958e+07	9.23118e+07	3.44458e+07	5.13474e+07	8.27925e+07	4.5617e+07	7.20844e+07
P40240	CD9 antigen OS=Mus musculus OX=10090 GN=Cd9 PE=1 SV=2	CD9 molecule	CD9	Plasma Membrane	other	4	0	138.239	16	3	511	3	1	226	25.2	7.23	20956	3	0	1.678	1.805	0.036621	0.125901	84.7	45.3	70.7	118.7	135.3	96.3	127.6	72.3	149.2	1.03235e+08	5.50545e+07	8.58082e+07	1.45041e+08	1.64304e+08	1.16844e+08	1.55522e+08	8.90172e+07	1.81679e+08
O89103	Complement component C1q receptor OS=Mus musculus OX=10090 GN=Cd93 PE=1 SV=1	CD93 molecule	CD93	Plasma Membrane	other	1	0	25.695	5	3	23	3	1	644	69.3	5.07	167	3	0	1.093	1.827	0.959439	0.08583	75.7	72.3	112.6	82.7	75.6	99.9	138.3	102.8	140.2	4.78172e+06	4.37824e+06	6.80368e+06	5.12978e+06	4.5992e+06	6.12889e+06	8.73763e+06	6.27567e+06	8.75643e+06
Q8VCN6	CD99 antigen OS=Mus musculus OX=10090 GN=Cd99 PE=1 SV=1	CD99 antigen	Cd99	Plasma Membrane	other	2	0	46.142	27	2	33	2	1	175	16.8	5.33	470	2	0
P56389	Cytidine deaminase OS=Mus musculus OX=10090 GN=Cda PE=1 SV=2	cytidine deaminase	CDA	Nucleus	enzyme	0	0	144.824	68	6	195	6	1	146	16.1	5.58	3618	6	0	2.022	2.093	0.000304	0.049843	72.9	59.3	57.8	122.4	119.9	119.5	143	81	124.2	9.36015e+07	7.62161e+07	7.42672e+07	1.57079e+08	1.54067e+08	1.53531e+08	1.83528e+08	1.04102e+08	1.59385e+08
Q61081	Hsp90 co-chaperone Cdc37 OS=Mus musculus OX=10090 GN=Cdc37 PE=1 SV=1	cell division cycle 37	CDC37	Cytoplasm	other	0	0	86.045	24	6	88	6	1	379	44.6	5.34	1041	6	0	0.953	0.867	0.404011	0.250911	88.5	102.3	102.2	97.3	143.3	97.2	96.7	88.6	83.9	1.70643e+07	1.97494e+07	1.97099e+07	1.8828e+07	2.76456e+07	1.88148e+07	1.86787e+07	1.70965e+07	1.61853e+07
P60766	Cell division control protein 42 homolog OS=Mus musculus OX=10090 GN=Cdc42 PE=1 SV=2	cell division cycle 42	Cdc42	Plasma Membrane	enzyme	0	0	395.491	69	15	1092	14	1	191	21.2	6.55	18635	15	1	0.929	1.054	0.826757	0.911205	120.9	86.6	97.3	120.2	83.7	90.3	102.5	95.8	102.8	9.83261e+08	7.03582e+08	7.89981e+08	9.76201e+08	6.79889e+08	7.34236e+08	8.32354e+08	7.77995e+08	8.36013e+08
Q3UU96	Serine/threonine-protein kinase MRCK alpha OS=Mus musculus OX=10090 GN=Cdc42bpa PE=1 SV=2	CDC42 binding protein kinase alpha	CDC42BPA	Cytoplasm	kinase	0	0	22.447	3	4	8	3	1	1719	195.4	6.51	120	4	0	1.102	0.819	0.508836	0.898491	23.9	115.1	139.8	97.5	134.9	126.9	46.5	121.2	94.2	931117	3.08496e+06	3.73821e+06	2.63814e+06	3.60905e+06	3.40417e+06	1.50963e+06	3.26614e+06	2.60866e+06
Q7TT50	Serine/threonine-protein kinase MRCK beta OS=Mus musculus OX=10090 GN=Cdc42bpb PE=1 SV=2	CDC42 binding protein kinase beta	CDC42BPB	Cytoplasm	kinase	0	0	209.34	18	23	189	21	1	1713	194.6	6.46	1987	23	2	1.459	1.09	0.207709	0.471517	71.3	87.6	102.7	82.4	142	127.9	86.9	95.5	103.7	3.75452e+07	4.62136e+07	5.41616e+07	4.34199e+07	7.47976e+07	6.74315e+07	4.58777e+07	5.04979e+07	5.52664e+07
Q80UW5	Serine/threonine-protein kinase MRCK gamma OS=Mus musculus OX=10090 GN=Cdc42bpg PE=1 SV=2	CDC42 binding protein kinase gamma	CDC42BPG	Cytoplasm	kinase	0	0	27.616	4	3	27	2	1	1551	172	6.05	35	3	0	0.998	1.107	0.755176	0.889342	96.8	112	81.6	96.6	138.1	76	107.1	125.1	66.8	1.24378e+06	1.43551e+06	1.05054e+06	1.24333e+06	1.77217e+06	982656	1.37587e+06	1.60407e+06	861584
Q91W92	Cdc42 effector protein 1 OS=Mus musculus OX=10090 GN=Cdc42ep1 PE=1 SV=1	CDC42 effector protein 1	CDC42EP1	Extracellular Space	other	0	0	15.123	3	1	1	1	1	409	43.1	7.21	25	1	0	1.012	0.741	0.769698	0.252782	73.4	144.6	123.4	57.9	129.2	124.9	60.7	94.4	91.4	1.64349e+06	3.25406e+06	2.76522e+06	1.29582e+06	2.89872e+06	2.82494e+06	1.35983e+06	2.12162e+06	2.04935e+06
Q8BHL7	CDC42 small effector protein 1 OS=Mus musculus OX=10090 GN=Cdc42se1 PE=1 SV=1	CDC42 small effector 1	CDC42SE1	Plasma Membrane	other	0	0	24.787	61	2	41	2	1	80	9.1	9.99	659	2	0	1.223	1.254	0.832993	0.656267	136.1	73	85.5	118.3	53	104.6	136.7	107.2	85.7	2.82549e+06	1.5152e+06	1.88276e+06	2.58489e+06	1.11457e+06	2.34548e+06	3.20818e+06	2.22689e+06	2.06656e+06
Q8JZM7	Parafibromin OS=Mus musculus OX=10090 GN=Cdc73 PE=1 SV=1	cell division cycle 73	CDC73	Nucleus	other	0	0	14.489	5	2	32	2	1	531	60.5	9.61	141	2	0	1.05	0.963	0.847115	0.90425	129.8	82.9	93.6	117.2	98.3	79.8	128.6	79.7	90.1	1.41417e+06	909704	1.0194e+06	1.27883e+06	1.06998e+06	872797	1.39954e+06	883375	981996
Q5U462	CUB domain-containing protein 1 OS=Mus musculus OX=10090 GN=Cdcp1 PE=2 SV=1	CUB domain containing protein 1	CDCP1	Plasma Membrane	other	1	0	28.267	5	3	16	3	1	833	92.7	7.75	108	3	0	0.915	1.248	0.121673	0.11573	106.3	94.6	91.2	86.5	91.9	79.2	118	130.9	101.4	8.00411e+06	7.27544e+06	7.0484e+06	6.4223e+06	6.87405e+06	6.22501e+06	9.50921e+06	1.01612e+07	7.81173e+06
P09803	Cadherin-1 OS=Mus musculus OX=10090 GN=Cdh1 PE=1 SV=1	cadherin 1	CDH1	Plasma Membrane	other	1	0	153.705	20	13	148	13	1	884	98.2	4.83	2567	13	0	1.203	1.491	0.361243	0.199904	103.2	58.9	72.3	143.7	87	78.7	162.8	85.5	107.8	9.07302e+07	5.19692e+07	6.38595e+07	1.26263e+08	7.69904e+07	6.96111e+07	1.4313e+08	7.54149e+07	9.56611e+07
P55288	Cadherin-11 OS=Mus musculus OX=10090 GN=Cdh11 PE=1 SV=1	cadherin 11	CDH11	Plasma Membrane	other	1	0.002	5.695	1	1	8	1	1	796	88.1	4.89	197	1	0	1.042	0.978	0.510289	0.716002	107	61.6	90.2	191.8	62.2	94	146.9	58	88.2	3.24792e+06	1.86038e+06	2.72407e+06	5.78338e+06	1.90853e+06	2.83246e+06	4.43892e+06	1.75681e+06	2.66677e+06
Q9WTR5	Cadherin-13 OS=Mus musculus OX=10090 GN=Cdh13 PE=1 SV=2	cadherin 13	CDH13	Plasma Membrane	other	0	0	75.562	9	4	85	4	1	714	78.1	5.12	1668	4	0	1.393	1.103	0.272109	0.349423	83.8	78	97.6	134.4	116.7	76.9	135.2	92.5	84.8	2.83203e+07	2.63539e+07	3.29112e+07	4.53114e+07	3.93638e+07	2.59301e+07	4.57634e+07	3.11756e+07	2.85816e+07
O88338	Cadherin-16 OS=Mus musculus OX=10090 GN=Cdh16 PE=1 SV=1	cadherin 16	CDH16	Plasma Membrane	enzyme	1	0	888.772	42	23	1992	23	1	830	89.8	4.67	33573	23	0	0.976	1.008	0.952376	0.837861	115.1	77.3	105.1	105.1	102.6	87.4	117.8	83.6	106	2.69153e+09	1.80597e+09	2.45486e+09	2.46346e+09	2.39704e+09	2.03835e+09	2.75002e+09	1.95313e+09	2.47256e+09
P15116	Cadherin-2 OS=Mus musculus OX=10090 GN=Cdh2 PE=1 SV=2	cadherin 2	CDH2	Plasma Membrane	other	1	0	49.476	8	3	9	3	1	906	99.7	4.78	33	3	0	0.806	0.509	0.802631	0.756349	171.7	41.1	116.7	142.9	94.1	56.1	164.2	59.4	53.9	6.25577e+06	1.51167e+06	4.24051e+06	5.15829e+06	3.46379e+06	2.16823e+06	5.95093e+06	2.14144e+06	1.98144e+06
P55284	Cadherin-5 OS=Mus musculus OX=10090 GN=Cdh5 PE=1 SV=2	cadherin 5	CDH5	Plasma Membrane	other	2	0	18.996	4	2	8	2	1	784	87.8	5.3	26	2	0	0.878	0.894	0.756583	0.865091	100.5	133.3	76.9	12.2	163.7	88.3	89.8	150	85.3	1.144e+06	1.51273e+06	878642	391129	1.85878e+06	1.03313e+06	1.03891e+06	1.74641e+06	1.00175e+06
E9Q7P9	Cadherin-related family member 2 OS=Mus musculus OX=10090 GN=Cdhr2 PE=1 SV=1	cadherin related family member 2	CDHR2	Plasma Membrane	other	1	0	327.793	22	25	575	25	1	1308	142.5	4.44	11539	25	0	0.959	1.186	0.220748	0.639719	91.8	123	96.1	93.8	75.1	92.2	97.9	114	116.2	3.88015e+08	5.19811e+08	4.05997e+08	3.96197e+08	3.17353e+08	3.89507e+08	4.13777e+08	4.81541e+08	4.91252e+08
Q8VHF2	Cadherin-related family member 5 OS=Mus musculus OX=10090 GN=Cdhr5 PE=1 SV=1	cadherin related family member 5	CDHR5	Plasma Membrane	other	1	0	417.484	32	21	770	21	1	831	88.2	5.08	13196	21	0	0.699	0.777	0.024128	0.050289	125.2	126.8	114.6	87.5	56.1	93.5	97.3	112.5	86.5	1.22435e+09	1.23924e+09	1.12104e+09	8.56317e+08	5.49671e+08	9.16315e+08	9.5283e+08	1.09983e+09	8.4641e+08
Q8VDP6	CDP-diacylglycerol--inositol 3-phosphatidyltransferase OS=Mus musculus OX=10090 GN=Cdipt PE=1 SV=1	CDP-diacylglycerol--inositol 3-phosphatidyltransferase	CDIPT	Cytoplasm	enzyme	3	0	13.112	5	1	23	1	1	213	23.6	8.27	923	1	0	1.111	1.141	0.403798	0.306701	93.8	84.4	105.7	104.2	94.2	105.4	107	93.9	111.5	1.91838e+07	1.71994e+07	2.1506e+07	2.12001e+07	1.91717e+07	2.14639e+07	2.18022e+07	1.92631e+07	2.26852e+07
Q8K0D0	Cyclin-dependent kinase 17 OS=Mus musculus OX=10090 GN=Cdk17 PE=1 SV=2	cyclin dependent kinase 17	CDK17	Cytoplasm	kinase	0	0	10.308	4	2	73	1	1	523	59.5	9.03	790	2	0	0.552	0.766	0.628564	0.852185		137.8		76	168.7	31.6	104	276.3	105.6		614694		341263	763922	193868	464275	1.25846e+06	471067
Q04899	Cyclin-dependent kinase 18 OS=Mus musculus OX=10090 GN=Cdk18 PE=1 SV=1	cyclin dependent kinase 18	CDK18	Cytoplasm	kinase	0	0	20.148	8	3	80	2	1	451	51.8	8.51	908	3	0	1.032	1.365	0.943491	0.43184	84.6	119.9	80.7	85.5	116	87.3	120.2	115.4	90.3	4.31748e+06	6.12237e+06	4.12437e+06	4.36774e+06	5.92204e+06	4.4575e+06	6.13814e+06	5.89936e+06	4.61456e+06
P49615	Cyclin-dependent-like kinase 5 OS=Mus musculus OX=10090 GN=Cdk5 PE=1 SV=1	cyclin dependent kinase 5	CDK5	Nucleus	kinase	0	0.001	8.827	8	3	85	2	1	292	33.3	7.66	928	3	0	1.217	1.106	0.155275	0.535391	104.3	83.2	89	108.3	119.7	96.6	116	84.5	98.5	4.21877e+06	3.36708e+06	3.60265e+06	4.38403e+06	4.84339e+06	3.91993e+06	4.69299e+06	3.45989e+06	3.98722e+06
Q64261	Cyclin-dependent kinase 6 OS=Mus musculus OX=10090 GN=Cdk6 PE=1 SV=2	cyclin dependent kinase 6	CDK6	Nucleus	kinase	0	0.002	5.669	7	2	73	1	1	326	37	6.62	790	2	0
Q4VAA2	Protein CDV3 OS=Mus musculus OX=10090 GN=Cdv3 PE=1 SV=2	CDV3 homolog	CDV3	Cytoplasm	other	0	0	25.979	11	1	19	1	1	281	29.7	6.1	328	1	0	2.016	1.087	0.160253	0.504365	76.9	110.2	37.5	155.1	158.6	80.9	74.9	122.3	83.6	671092	969251	328308	1.32931e+06	1.36688e+06	697781	640935	1.06131e+06	715174
P31809	Carcinoembryonic antigen-related cell adhesion molecule 1 OS=Mus musculus OX=10090 GN=Ceacam1 PE=1 SV=1	CEA cell adhesion molecule 1	CEACAM1	Plasma Membrane	transporter	1	0	21.979	5	2	6	2	1	521	57	5.58	70	2	0	0.506	0.9	0.579432	0.689052	145.7	132.9	61.7	150.5	67.2	49	119.6	126.9	46.5	1.10474e+07	1.00462e+07	4.70501e+06	1.16277e+07	5.06733e+06	3.85475e+06	9.06513e+06	9.57001e+06	3.69194e+06
Q5FWI3	Cell surface hyaluronidase OS=Mus musculus OX=10090 GN=Tmem2 PE=1 SV=1	cell migration inducing hyaluronidase 2	CEMIP2	Cytoplasm	enzyme	1	0	61.603	12	13	66	13	1	1383	153.7	7.78	364	13	0	1.132	1.428	0.227981	0.014638	79.7	86.7	79.4	90.3	131.5	86.4	113.8	102.7	129.4	2.93923e+07	3.19577e+07	2.92402e+07	3.33894e+07	4.9763e+07	3.19695e+07	4.19145e+07	3.78667e+07	4.84969e+07
Q8K1K4	Centromere protein I OS=Mus musculus OX=10090 GN=Cenpi PE=2 SV=1	centromere protein I	CENPI	Nucleus	other	0	0.033	2.495	1	1	2	1	1	746	85.3	8.05	40	1	0	1.038	0.978	0.626766	0.868437	61.5	90.6	172.4	94	83.2	94.6	88.6	72.9	142.2	451804	650375	1.24143e+06	672938	636307	692904	634080	521714	1.05631e+06
Q569L8	Centromere protein J OS=Mus musculus OX=10090 GN=Cenpj PE=2 SV=2	centromere protein J	CENPJ	Nucleus	transcription regulator	0	0.054	2.061	1	1	4	1	1	1344	153	6.55	29	1	0	1.172	0.831	0.506032	0.754993	102.2	59.2	108.5	119.8	67.6	141.1	85	62.5	154.1	781675	451472	827856	912595	521310	1.07927e+06	648524	475770	1.18595e+06
Q9CXS4	Centromere protein V OS=Mus musculus OX=10090 GN=Cenpv PE=1 SV=2	centromere protein V	CENPV	Nucleus	other	0	0	15.489	6	1	2	1	1	252	27.5	9.79	86	1	0	1.296	0.988	0.649086	0.964321	130.6	213.9			216.6		207.5	131.3		416674	689804			691020		661921	418957
Q6ZQ06	Centrosomal protein of 162 kDa OS=Mus musculus OX=10090 GN=Cep162 PE=1 SV=2	centrosomal protein 162	CEP162	Nucleus	other	0	0.091	1.708	0	1	1	1	1	1403	160.8	5.53	0	1	0	1.768	1.041	0.425628	0.495856	46.8	38.8	103.2	82.8	42.9	197.7	48.8	37.3	301.6	137828	112204	296842	237971	127894	568769	140483	107935	865451
Q8BGS7	Choline/ethanolaminephosphotransferase 1 OS=Mus musculus OX=10090 GN=Cept1 PE=1 SV=1	choline/ethanolamine phosphotransferase 1	CEPT1	Cytoplasm	enzyme	8	0.015	3.369	3	1	24	1	1	416	46.4	8.1	51	1	0	1.22	1.265	0.209527	0.410198	79.5	80.9	96.8	94.6	155.7	98.7	116.3	102.3	75.2	8.29188e+06	8.39338e+06	1.00407e+07	9.88934e+06	1.6153e+07	1.0286e+07	1.21035e+07	1.06174e+07	8.91125e+06
Q924Z4	Ceramide synthase 2 OS=Mus musculus OX=10090 GN=Cers2 PE=1 SV=1	ceramide synthase 2	CERS2	Nucleus	transcription regulator	6	0	70.593	12	4	104	4	1	380	45	8.75	1515	4	0	1.187	1.117	0.32607	0.409331	88.5	93.3	97.7	110.7	122	84.8	104.2	113	85.7	4.28206e+07	4.52017e+07	4.72345e+07	5.35442e+07	5.9446e+07	4.1237e+07	5.05442e+07	5.47402e+07	4.14956e+07
Q9D6K9	Ceramide synthase 5 OS=Mus musculus OX=10090 GN=Cers5 PE=1 SV=1	ceramide synthase 5	CERS5	Cytoplasm	transcription regulator	5	0	22.798	4	1	17	1	1	414	48.1	8.07	388	1	0	0.823	0.924	0.992605	0.637572	123.2	33.3	127	101.4	67.4	115.7	113.9	94.3	123.9	938427	253503	987052	774799	513497	893005	869361	718257	944973
Q8C172	Ceramide synthase 6 OS=Mus musculus OX=10090 GN=Cers6 PE=1 SV=1	ceramide synthase 6	CERS6	Nucleus	transcription regulator	5	0.031	2.594	2	1	28	1	1	384	44.8	7.64	338	1	0	1.054	1.23	0.448287	0.283407	74.7	91.3	107.4	110.2	96.2	94	125.1	112.3	88.8	5.40405e+06	6.57449e+06	7.74959e+06	7.93257e+06	6.94765e+06	6.76862e+06	9.0012e+06	8.09124e+06	6.3919e+06
Q9EQG9	Collagen type IV alpha-3-binding protein OS=Mus musculus OX=10090 GN=Col4a3bp PE=1 SV=1	ceramide transporter 1	CERT1	Cytoplasm	kinase	0	0	48.299	17	6	57	6	1	624	71.1	5.44	421	6	0	0.778	0.684	0.513101	0.523517	92.9	132.8	107.7	78.7	128.6	83.8	73.6	141.4	60.5	1.24226e+07	1.77541e+07	1.43981e+07	1.05609e+07	1.7188e+07	1.12003e+07	9.85176e+06	1.89055e+07	8.12029e+06
Q8VCT4	Carboxylesterase 1D OS=Mus musculus OX=10090 GN=Ces1d PE=1 SV=1	carboxylesterase 1	CES1	Cytoplasm	enzyme	0	0	510.227	61	28	1029	25	1	565	61.7	6.61	11873	28	3	1.143	0.904	0.127935	0.612068	99.1	73.6	107.9	113.2	108.2	135.6	93.2	89.5	79.7	5.10861e+08	3.79792e+08	5.56213e+08	5.83888e+08	5.5792e+08	6.99095e+08	4.80761e+08	4.61792e+08	4.11264e+08
P23953	Carboxylesterase 1C OS=Mus musculus OX=10090 GN=Ces1c PE=1 SV=4	carboxylesterase 1C	Ces1b/Ces1c	Cytoplasm	enzyme	0	0	85.023	25	10	222	7	1	554	61	5.06	1810	10	0	2.621	4.671	0.047837	0.036468	33.6	38.9	18.6	131.8	88.1	58.5	157.1	107.1	266.1	6.85494e+06	7.86848e+06	3.84154e+06	2.64315e+07	1.76435e+07	1.19111e+07	3.14637e+07	2.14166e+07	5.32362e+07
Q64176	Carboxylesterase 1E OS=Mus musculus OX=10090 GN=Ces1e PE=1 SV=1	carboxylesterase 1E	Ces1e	Cytoplasm	enzyme	0	0	69.433	23	8	219	5	1	562	61.5	6.15	1693	8	0	1.377	1.015	0.226713	0.601072	88	71.1	129.3	121.2	118.1	123.4	89.3	106.2	53.3	7.40129e+06	6.36781e+06	1.09261e+07	1.01816e+07	9.8918e+06	1.05822e+07	7.7853e+06	8.92222e+06	4.60243e+06
Q91WU0	Carboxylesterase 1F OS=Mus musculus OX=10090 GN=Ces1f PE=1 SV=1	carboxylesterase 1F	Ces1f	Cytoplasm	other	0	0	843.205	69	38	2038	34	1	561	61.6	6.48	26834	38	4	1.375	0.993	0.007598	0.589262	91.7	87.4	99.2	114	131.7	126.1	91	106	52.8	1.38977e+09	1.32547e+09	1.50585e+09	1.72844e+09	1.99792e+09	1.91281e+09	1.37932e+09	1.6083e+09	8.01285e+08
Q8VCC2	Liver carboxylesterase 1 OS=Mus musculus OX=10090 GN=Ces1 PE=1 SV=1	carboxylesterase 1G	Ces1g	ER	other	0	0	60.863	22	9	208	6	1	565	62.6	6	2739	9	0	1.289	2.243	0.10046	0.082074	69.3	61.5	70.2	71.3	89.3	105	81.9	196.2	155.4	6.42405e+06	6.28964e+06	6.69305e+06	6.75681e+06	8.63219e+06	9.71529e+06	7.32128e+06	1.75107e+07	1.38687e+07
Q91WG0	Acylcarnitine hydrolase OS=Mus musculus OX=10090 GN=Ces2c PE=1 SV=1	carboxylesterase 2C	Ces2c	ER	enzyme	1	0	475.318	54	21	983	19	1	561	62.4	5.69	13515	21	2	1.306	1.104	0.063644	0.655958	84.5	86.8	104.7	113.3	113	145.6	95.7	102.7	53.7	5.36131e+08	5.50692e+08	6.64432e+08	7.1941e+08	7.1718e+08	9.2443e+08	6.08103e+08	6.53059e+08	3.4075e+08
Q8BK48	Pyrethroid hydrolase Ces2e OS=Mus musculus OX=10090 GN=Ces2e PE=1 SV=1	carboxylesterase 2E	Ces2e	ER	other	0	0	42.006	7	3	139	1	1	559	62.3	6.16	1054	3	0	1.43	1.01	0.464278	0.972916	91.9	24.1	148.4	73.2	131.5	170.6	70.1	92.9	97.4	309774	80313	541733	249538	438726	583969	240334	327178	330582
P04186	Complement factor B OS=Mus musculus OX=10090 GN=Cfb PE=1 SV=2	complement factor B	CFB	Extracellular Space	peptidase	0	0	95.076	19	10	78	10	1	761	85	7.37	737	10	0	2.002	2.041	0.171783	0.149189	54.9	46.6	39.8	93.2	223.3	66.9	95	69.4	210.9	1.26798e+07	1.09762e+07	9.21248e+06	2.15452e+07	5.20122e+07	1.54441e+07	2.19217e+07	1.62028e+07	4.87253e+07
P03953	Complement factor D OS=Mus musculus OX=10090 GN=Cfd PE=1 SV=1	complement factor D	CFD	Extracellular Space	peptidase	0	0	10.249	3	1	7	1	1	259	28	6.67	100	1	0	2.57	4.233	0.051773	0.045031	40.3	38.7	25.2	99.5	165.3	71.5	77.7	163.8	218	794408	756935	493698	1.94233e+06	3.22625e+06	1.39464e+06	1.52177e+06	3.19768e+06	4.25845e+06
P06909	Complement factor H OS=Mus musculus OX=10090 GN=Cfh PE=1 SV=2	complement factor H	CFH	Extracellular Space	other	0	0	58.083	6	5	41	5	1	1234	139	6.99	184	5	0	2.009	2.602	0.037393	0.066753	38.1	49.8	48.1	87.2	157.5	96.7	125.2	84.2	213.1	1.04146e+07	1.46743e+07	1.35067e+07	2.31816e+07	4.2544e+07	2.60964e+07	3.32467e+07	2.3981e+07	5.66295e+07
Q61129	Complement factor I OS=Mus musculus OX=10090 GN=Cfi PE=1 SV=3	complement factor I	CFI	Extracellular Space	peptidase	0	0	26.904	9	4	6	4	1	603	67.2	7.46	58	4	0	3.248	4.707	0.019215	0.065516	34.7	24.8	33.1	121.7	107.7	64	156	83.4	274.5	1.16953e+06	820409	1.01311e+06	3.70811e+06	3.30544e+06	1.95006e+06	4.78904e+06	2.55346e+06	8.37429e+06
P18760	Cofilin-1 OS=Mus musculus OX=10090 GN=Cfl1 PE=1 SV=3	cofilin 1	CFL1	Nucleus	other	0	0	203.264	63	11	353	10	1	166	18.5	8.09	5132	11	1	1.103	1.153	0.971841	0.985025	136.4	86.9	76.3	120.8	85.3	95.9	112.3	100.2	85.9	3.14516e+08	2.0051e+08	1.7611e+08	2.78616e+08	1.96596e+08	2.21215e+08	2.58948e+08	2.31105e+08	1.98625e+08
P45591	Cofilin-2 OS=Mus musculus OX=10090 GN=Cfl2 PE=1 SV=1	cofilin 2	CFL2	Extracellular Space	other	0	0	35.493	25	3	74	2	1	166	18.7	7.88	2028	3	0	1.234	1.033	0.111355	0.932058	110.7	95.3	64.9	119.4	116.3	117.6	98.5	109.6	67.8	6.01747e+06	5.11784e+06	3.65394e+06	6.84998e+06	6.24407e+06	6.42449e+06	5.42339e+06	5.93673e+06	3.75758e+06
P11680	Properdin OS=Mus musculus OX=10090 GN=Cfp PE=2 SV=2	complement factor properdin	CFP	Extracellular Space	other	0	0	21.214	7	3	4	3	1	464	50.3	7.84	72	3	0	3.669	8.323	0.384194	0.245064		17.3	14.2	57.6	305.7	29.5	130.6	41.9	303.3		506633	374976	1.56739e+06	8.13162e+06	777082	3.45393e+06	1.11022e+06	8.05391e+06
P26361	Cystic fibrosis transmembrane conductance regulator OS=Mus musculus OX=10090 GN=Cftr PE=1 SV=2	CF transmembrane conductance regulator	CFTR	Plasma Membrane	ion channel	11	0.001	7.533	2	2	3	2	1	1476	167.8	8.69	55	2	0	1.334	2.576	0.880944	0.162387	67.4	104	59.7	116.1	37.9	89.9	173.5	180.3	71.3	345612	541114	321402	623133	198224	460834	889847	925094	398769
P59242	Cingulin OS=Mus musculus OX=10090 GN=Cgn PE=1 SV=1	cingulin	CGN	Plasma Membrane	other	0	0	19.847	3	3	33	3	1	1191	136.4	5.91	198	3	0	0.887	1.019	0.429893	0.826988	90.8	204.3	56.9	80.5	91.1	60.8	92.5	156.2	67	1.63035e+06	3.63864e+06	1.02954e+06	1.43248e+06	1.62221e+06	1.10132e+06	1.65065e+06	2.80614e+06	1.1937e+06
Q8R1U2	Cell growth regulator with EF hand domain protein 1 OS=Mus musculus OX=10090 GN=Cgref1 PE=1 SV=1	cell growth regulator with EF-hand domain 1	CGREF1	Extracellular Space	other	0	0	40.175	14	2	5	2	1	281	30.8	4.31	36	2	0	0.564	2.854	0.567198	0.054872	72.7	23.1	118.1	41	9.2	94.5	207.5	213.5	120.6	1.53495e+06	502938	2.62964e+06	867347	194217	1.99186e+06	4.40467e+06	4.50239e+06	2.54446e+06
Q8BMJ7	Cell growth regulator with RING finger domain protein 1 OS=Mus musculus OX=10090 GN=Cgrrf1 PE=2 SV=1	cell growth regulator with ring finger domain 1	CGRRF1	Nucleus	other	1	0.028	2.663	5	1	1	1	1	332	37.9	5.05	0	1	0	0.91	0.899	0.471237	0.193224	107.9	114.5	105.9	121.9	76	98.2	97	107.7	70.8	1.53703e+06	1.44631e+06	1.33768e+06	1.58478e+06	969923	1.24275e+06	1.23262e+06	1.46899e+06	907844
Q9D1L0	Coiled-coil-helix-coiled-coil-helix domain-containing protein 2 OS=Mus musculus OX=10090 GN=Chchd2 PE=2 SV=1	coiled-coil-helix-coiled-coil-helix domain containing 2	CHCHD2	Cytoplasm	other	0	0	15.489	16	1	27	1	1	153	15.7	9.66	784	1	0	1.014	1.182	0.78795	0.180117	96.7	103.4	71	98.1	109.5	75.6	114.3	95.4	135.9	9.79095e+06	1.04957e+07	7.18691e+06	9.93775e+06	1.10917e+07	7.65736e+06	1.15705e+07	9.6682e+06	1.37591e+07
Q9CRB9	MICOS complex subunit Mic19 OS=Mus musculus OX=10090 GN=Chchd3 PE=1 SV=1	coiled-coil-helix-coiled-coil-helix domain containing 3	CHCHD3	Cytoplasm	transcription regulator	0	0	89.865	44	7	66	7	1	227	26.3	8.37	1903	7	0	0.742	0.86	0.344715	0.237703	105.4	95.6	149.9	123.1	78.3	77.1	90.7	106.7	73.1	5.35625e+07	4.86095e+07	7.64109e+07	6.25886e+07	3.97675e+07	3.92336e+07	4.60846e+07	5.42534e+07	3.82455e+07
Q8VEA4	Mitochondrial intermembrane space import and assembly protein 40 OS=Mus musculus OX=10090 GN=Chchd4 PE=1 SV=1	coiled-coil-helix-coiled-coil-helix domain containing 4	CHCHD4	Cytoplasm	enzyme	0	0.001	6.79	20	1	1	1	1	139	15.5	4.32	0	1	0	0.567	0.534	0.435342	0.398299	99.5	40.1	329.3	56.4	16.1	146.4	53.1	46.8	112.2	403489	189626	1.34043e+06	228075	65199.2	592063	224309	199389	483083
Q91VN4	MICOS complex subunit Mic25 OS=Mus musculus OX=10090 GN=Chchd6 PE=1 SV=2	coiled-coil-helix-coiled-coil-helix domain containing 6	CHCHD6	Cytoplasm	other	0	0	19.626	5	1	15	1	1	273	29.8	8.41	423	1	0	0.963	0.88	0.579595	0.447876	90.2	105.5	122.6	101.6	114.8	74.7	89.3	108.3	92.9	3.77249e+06	4.41503e+06	5.12669e+06	4.25288e+06	4.80575e+06	3.12397e+06	3.74472e+06	4.54739e+06	3.90315e+06
Q8K2Q5	Coiled-coil-helix-coiled-coil-helix domain-containing protein 7 OS=Mus musculus OX=10090 GN=Chchd7 PE=1 SV=1	coiled-coil-helix-coiled-coil-helix domain containing 7	CHCHD7	Cytoplasm	other	0	0.001	8.653	12	2	4	2	1	85	10.1	8.51	32	2	0	0.979	1.104	0.395085	0.929925	83.7	79.7	168.2	95.2	81.9	69.4	92.4	84.5	145	438049	396602	926233	511412	396014	337048	487584	420177	813768
Q6PDQ2	Chromodomain-helicase-DNA-binding protein 4 OS=Mus musculus OX=10090 GN=Chd4 PE=1 SV=1	chromodomain helicase DNA binding protein 4	CHD4	Nucleus	enzyme	0	0	13.464	2	2	5	2	1	1915	217.6	5.81	113	2	0	0.839	0.747	0.637662	0.453708	130	63.4	146.1	126.5	52.3	109.1	102.4	73.2	97.1	802762	402068	905509	781207	340806	673911	632765	454880	600631
A2AJK6	Chromodomain-helicase-DNA-binding protein 7 OS=Mus musculus OX=10090 GN=Chd7 PE=1 SV=1	chromodomain helicase DNA binding protein 7	CHD7	Nucleus	enzyme	0	0.042	2.296	1	1	7	1	1	2986	333.9	6.47	0	1	0	1.303	1.061	0.723265	0.894641	59	28.3	176.7	222.3	76.9	45.5	188.2	40.4	62.7	477805	290568	1.32457e+06	1.64572e+06	690358	336026	1.40565e+06	299860	472212
Q8BJ64	Choline dehydrogenase, mitochondrial OS=Mus musculus OX=10090 GN=Chdh PE=1 SV=1	choline dehydrogenase	CHDH	Cytoplasm	enzyme	0	0	633.209	68	30	903	30	1	596	66.4	8.51	11479	30	0	0.883	1.163	0.514572	0.828925	85.9	93	130.4	112.3	82	77.2	100.2	110.8	108.1	6.47699e+08	7.00675e+08	9.83205e+08	8.46567e+08	6.1854e+08	5.81986e+08	7.55106e+08	8.35371e+08	8.14824e+08
Q8CGZ0	Calcium homeostasis endoplasmic reticulum protein OS=Mus musculus OX=10090 GN=Cherp PE=1 SV=1	calcium homeostasis endoplasmic reticulum protein	CHERP	Cytoplasm	other	0	0.011	3.734	2	1	1	1	1	936	106.1	9.14	30	1	0	1.406	1.295	0.548527	0.72251	160.1	22.4	72.1	101.3	138.6	97.8	67.9	93.3	146.5	470043	65715.6	229149	303648	407762	288010	199900	285175	431301
Q922Q9	Chitinase domain-containing protein 1 OS=Mus musculus OX=10090 GN=Chid1 PE=1 SV=1	chitinase domain containing 1	CHID1	Extracellular Space	other	0	0.001	6.078	7	2	11	2	1	393	44.9	7.97	29	2	0	0.924	1.514	0.831388	0.357313	106.6	88.8	85.8	120.9	66.4	82	134.4	140.3	74.8	1.05843e+07	8.72842e+06	8.35431e+06	1.19432e+07	6.91607e+06	8.01955e+06	1.32129e+07	1.36862e+07	7.30036e+06
O35744	Chitinase-like protein 3 OS=Mus musculus OX=10090 GN=Chil3 PE=1 SV=2	chitinase-like 3	Chil3/Chil4	Cytoplasm	enzyme	0	0	29.534	9	2	7	2	1	398	44.4	5.69	263	2	0	2.619	3.607	0.083821	0.042247	59.8	29.2	38.7	87.7	208.7	101.4	161.2	73.4	139.7	2.55848e+06	1.32839e+06	1.66137e+06	3.80049e+06	8.97926e+06	4.49169e+06	7.08117e+06	3.13846e+06	6.11031e+06
Q9DB34	Charged multivesicular body protein 2a OS=Mus musculus OX=10090 GN=Chmp2a PE=1 SV=1	charged multivesicular body protein 2A	CHMP2A	Cytoplasm	other	0	0	33.066	12	3	19	3	1	222	25.1	5.97	850	3	0	1.41	0.91	0.059221	0.876592	77.8	104.2	90.8	103.8	129.5	128	82.6	72.7	110.7	5.31242e+06	7.11316e+06	6.20682e+06	7.06882e+06	8.96016e+06	8.75058e+06	5.6335e+06	4.96644e+06	7.75134e+06
Q9CQ10	Charged multivesicular body protein 3 OS=Mus musculus OX=10090 GN=Chmp3 PE=1 SV=3	charged multivesicular body protein 3	CHMP3	Cytoplasm	other	0	0.02	3.002	4	1	1	1	1	224	25.2	5.06	18	1	0	1.283	1.016	0.005733	0.827851	92.9	95.7	79.2	119.2	115.1	121.9	109.4	72.3	94.4	5.33774e+06	5.47069e+06	4.52397e+06	6.81184e+06	6.6444e+06	6.95546e+06	6.23731e+06	4.12116e+06	5.39167e+06
Q9D8B3	Charged multivesicular body protein 4b OS=Mus musculus OX=10090 GN=Chmp4b PE=1 SV=2	charged multivesicular body protein 4B	CHMP4B	Cytoplasm	other	0	0	37.077	23	4	32	4	1	224	24.9	4.82	1203	4	0	1.2	0.914	0.51867	0.979776	79.5	102.5	105.6	123.1	77.8	123.2	106.6	88.1	93.7	1.82164e+07	2.34591e+07	2.41202e+07	2.8221e+07	1.77868e+07	2.81635e+07	2.43701e+07	2.01289e+07	2.14214e+07
Q9D7S9	Charged multivesicular body protein 5 OS=Mus musculus OX=10090 GN=Chmp5 PE=1 SV=1	charged multivesicular body protein 5	CHMP5	Cytoplasm	other	0	0	17.708	11	2	13	2	1	219	24.6	4.79	194	2	0	1.131	1.058	0.948154	0.872809	104.9	72.4	125.1	131.7	57.8	118.6	110.9	57.5	121.2	6.03459e+06	4.18036e+06	7.24488e+06	7.69057e+06	3.42293e+06	6.86398e+06	6.38146e+06	3.36764e+06	6.9742e+06
P0C0A3	Charged multivesicular body protein 6 OS=Mus musculus OX=10090 GN=Chmp6 PE=1 SV=2	charged multivesicular body protein 6	CHMP6	Cytoplasm	other	0	0	101.483	35	5	73	5	1	200	23.4	5.44	2951	5	0	0.848	0.662	0.165628	0.011724	119.4	135.1	105.8	101.2	113.6	81.9	79	86.4	77.5	5.72725e+07	6.40713e+07	5.0182e+07	4.89465e+07	5.41127e+07	3.90056e+07	3.78855e+07	4.10643e+07	3.67972e+07
Q8R1T1	Charged multivesicular body protein 7 OS=Mus musculus OX=10090 GN=Chmp7 PE=1 SV=1	charged multivesicular body protein 7	CHMP7	Cytoplasm	other	0	0	15.489	3	1	12	1	1	451	50.6	5.22	158	1	0	1.047	1.251	0.308592	0.217413	95.2	63.5	98.3	106.2	92.4	99.7	141.5	84.3	119	812575	582309	890080	964609	814436	862298	1.22979e+06	779959	1.05503e+06
P61022	Calcineurin B homologous protein 1 OS=Mus musculus OX=10090 GN=Chp1 PE=1 SV=2	calcineurin like EF-hand protein 1	CHP1	Cytoplasm	other	0	0	340.355	90	18	501	18	1	195	22.4	5.1	7092	18	0	0.826	0.989	0.166015	0.6304	112.5	108.4	108.2	109.3	65.2	89.5	107.2	124	75.7	4.43741e+08	4.27384e+08	4.26436e+08	4.3099e+08	2.56933e+08	3.52918e+08	4.22828e+08	4.89975e+08	2.98403e+08
Q8C025	Cholinephosphotransferase 1 OS=Mus musculus OX=10090 GN=Chpt1 PE=1 SV=1	choline phosphotransferase 1	CHPT1	Cytoplasm	enzyme	8	0	35.314	8	3	84	3	1	398	44.6	7.08	1200	3	0	1.023	1.119	0.312771	0.621053	94.6	85.7	95.7	96.8	141.2	92.8	105.9	110.1	77.3	9.2931e+07	8.42234e+07	9.39723e+07	9.50472e+07	1.38816e+08	9.12149e+07	1.03969e+08	1.08187e+08	7.58952e+07
O88199	Carbohydrate sulfotransferase 3 OS=Mus musculus OX=10090 GN=Chst3 PE=2 SV=1	carbohydrate sulfotransferase 3	CHST3	Cytoplasm	enzyme	1	0.044	2.271	2	1	2	1	1	472	54	9.1	0	1	0
Q99KN2	Probable cytosolic iron-sulfur protein assembly protein CIAO1 OS=Mus musculus OX=10090 GN=Ciao1 PE=1 SV=1	cytosolic iron-sulfur assembly component 1	CIAO1	Nucleus	transcription regulator	0	0	27.412	9	2	13	2	1	339	37.6	4.88	109	2	0	1.288	1.141	0.179022	0.518351	82.7	107.5	84.1	97	126.9	108.3	95.9	91.7	106	2.73775e+06	3.57667e+06	2.77749e+06	3.2195e+06	4.20284e+06	3.57618e+06	3.176e+06	3.02923e+06	3.50227e+06
Q9Z0F4	Calcium and integrin-binding protein 1 OS=Mus musculus OX=10090 GN=Cib1 PE=1 SV=3	calcium and integrin binding 1	CIB1	Nucleus	other	0	0	26.733	22	2	10	2	1	191	21.8	4.65	210	2	0	2.397	2.431	0.394514	0.553091	48.6	43	150	100.8	125.9	116.5	118.2	74.8	122.2	1.15774e+06	1.12749e+06	3.57845e+06	2.414e+06	3.01136e+06	2.77722e+06	2.82317e+06	1.78224e+06	2.91055e+06
Q9DA19	Corepressor interacting with RBPJ 1 OS=Mus musculus OX=10090 GN=Cir1 PE=1 SV=2	corepressor interacting with RBPJ, 1	CIR1	Nucleus	transcription regulator	0	0.037	2.401	2	1	2	1	1	450	51.8	9.92	13	1	0	0.52	0.617	0.150251	0.083105	148.3	95.5	150.5	77.1	42.7	120.7	91.6	78.3	95.4	2.23167e+07	1.44207e+07	2.27421e+07	1.16084e+07	6.42987e+06	1.82682e+07	1.37995e+07	1.20645e+07	1.43528e+07
Q91WS0	CDGSH iron-sulfur domain-containing protein 1 OS=Mus musculus OX=10090 GN=Cisd1 PE=1 SV=1	CDGSH iron sulfur domain 1	CISD1	Cytoplasm	other	1	0	206.168	55	10	509	10	1	108	12.1	9.06	8450	10	0	0.724	0.964	0.397602	0.753571	107.2	84.1	134	119.5	67	77.6	109.1	98	103.3	5.37581e+08	4.17575e+08	6.65321e+08	5.99482e+08	3.32967e+08	3.85449e+08	5.47216e+08	4.86611e+08	5.13775e+08
Q9CQB5	CDGSH iron-sulfur domain-containing protein 2 OS=Mus musculus OX=10090 GN=Cisd2 PE=1 SV=1	CDGSH iron sulfur domain 2	CISD2	Cytoplasm	other	1	0	15.489	10	1	20	1	1	135	15.2	9.51	825	1	0	1.068	0.983	0.232104	0.887435	96.9	94.5	103.5	103.4	111.6	99.1	95.2	112	83.8	1.08612e+07	1.05789e+07	1.15829e+07	1.15749e+07	1.2486e+07	1.10941e+07	1.06622e+07	1.26103e+07	9.38448e+06
B1AR13	CDGSH iron-sulfur domain-containing protein 3, mitochondrial OS=Mus musculus OX=10090 GN=Cisd3 PE=1 SV=1	CDGSH iron sulfur domain 3	CISD3	Cytoplasm	other	0	0	77.763	35	5	140	5	1	137	15.7	9.79	993	5	0	0.942	1.029	0.21506	0.877378	99.6	118.4	99.3	93.8	102.9	76.8	102.5	129.6	77.1	8.29427e+07	9.85578e+07	8.24568e+07	7.7777e+07	8.52871e+07	6.38584e+07	8.51879e+07	1.07493e+08	6.39543e+07
Q3V1H1	Cytoskeleton-associated protein 2 OS=Mus musculus OX=10090 GN=Ckap2 PE=1 SV=1	cytoskeleton associated protein 2	CKAP2	Cytoplasm	other	0	0.045	2.224	5	1	1	1	1	664	74	9.23	0	1	0
Q8BMK4	Cytoskeleton-associated protein 4 OS=Mus musculus OX=10090 GN=Ckap4 PE=1 SV=2	cytoskeleton associated protein 4	CKAP4	Cytoplasm	other	1	0	79.339	20	9	45	9	1	575	63.7	5.64	671	9	0	1.145	1.018	0.240326	0.265829	36.4	86.3	92.2	98.8	189.9	82.5	84.7	87.8	141.4	4.22908e+06	1.01617e+07	1.10459e+07	1.13703e+07	2.17029e+07	9.96665e+06	9.69248e+06	1.04463e+07	1.64115e+07
A2AGT5	Cytoskeleton-associated protein 5 OS=Mus musculus OX=10090 GN=Ckap5 PE=1 SV=1	cytoskeleton associated protein 5	CKAP5	Nucleus	transcription regulator	0	0.001	6.774	2	2	5	2	1	2032	225.5	7.96	74	2	0	2.489	1.288	0.471858	0.944885	155.7		30.3	200.4	74.6	170.8	78.5	101.4	88.4	338377		70307.1	436841	161909	384143	184875	220096	281808
Q04447	Creatine kinase B-type OS=Mus musculus OX=10090 GN=Ckb PE=1 SV=1	creatine kinase B	CKB	Cytoplasm	kinase	0	0	21.575	15	3	15	3	1	381	42.7	5.67	206	3	0	1.368	1.184	0.067125	0.135428	89.8	70.5	83.9	101.4	154.3	114.8	99.4	85.9	99.9	8.51727e+06	6.67748e+06	7.96036e+06	9.64753e+06	1.46378e+07	1.09083e+07	9.42962e+06	8.27247e+06	9.49496e+06
P30275	Creatine kinase U-type, mitochondrial OS=Mus musculus OX=10090 GN=Ckmt1 PE=1 SV=1	creatine kinase, mitochondrial 1B	CKMT1A/CKMT1B	Cytoplasm	kinase	0	0	99.803	33	8	46	8	1	418	47	8.16	406	8	0	1.217	1.043	0.350682	0.482078	93.5	71.7	104.2	142.6	113.8	78.8	97.5	88.9	109	1.43e+07	1.09057e+07	1.57924e+07	2.15617e+07	1.73706e+07	1.21733e+07	1.4951e+07	1.36823e+07	1.71424e+07
Q8BRT1	CLIP-associating protein 2 OS=Mus musculus OX=10090 GN=Clasp2 PE=1 SV=1	cytoplasmic linker associated protein 2	CLASP2	Cytoplasm	other	0	0.019	3.025	1	1	7	1	1	1286	140.7	8.63	25	1	0	0.83	0.873	0.570808	0.759541	108.8	72.4	144.9	90.3	57.9	125.1	95	76.3	129.2	1.84724e+07	1.22942e+07	2.46018e+07	1.53333e+07	9.84679e+06	2.12945e+07	1.61279e+07	1.29636e+07	2.1944e+07
Q9QX15	Calcium-activated chloride channel regulator 3A-1 OS=Mus musculus OX=10090 GN=Clca3a1 PE=1 SV=1	chloride channel accessory 3A1	Clca3a1/Clca3a2	Plasma Membrane	ion channel	0	0	24.956	4	3	8	3	1	902	100	6.86	224	3	0	0.94	0.956	0.951439	0.63938	104	33.7	194	130.7	97.8	93.9	127.2	19.2	99.4	2.28839e+06	743680	4.25438e+06	2.91977e+06	2.13618e+06	2.05516e+06	2.81909e+06	434368	2.37184e+06
Q99LI2	Chloride channel CLIC-like protein 1 OS=Mus musculus OX=10090 GN=Clcc1 PE=1 SV=1	chloride channel CLIC like 1	CLCC1	Cytoplasm	ion channel	3	0	30.943	9	3	19	3	1	539	60.6	5.68	99	3	0	1.162	1.168	0.348552	0.780314	89	70.5	115.5	130.5	94.9	103.4	129.8	62.4	103.9	1.90495e+06	1.54578e+06	2.6329e+06	2.77484e+06	2.07444e+06	2.22007e+06	2.779e+06	1.59533e+06	2.28999e+06
P51791	H(+)/Cl(-) exchange transporter 3 OS=Mus musculus OX=10090 GN=Clcn3 PE=1 SV=2	chloride voltage-gated channel 3	CLCN3	Plasma Membrane	ion channel	11	0	82.624	17	11	263	10	1	818	90.8	6.28	2046	11	0	0.95	0.971	0.501894	0.983921	91.5	108.9	103.1	97.9	96.1	98.1	127.6	100.1	76.8	1.22015e+08	1.44316e+08	1.36217e+08	1.29407e+08	1.26927e+08	1.29713e+08	1.68697e+08	1.33158e+08	1.04126e+08
Q61418	H(+)/Cl(-) exchange transporter 4 OS=Mus musculus OX=10090 GN=Clcn4 PE=2 SV=2	chloride voltage-gated channel 4	CLCN4	Plasma Membrane	ion channel	10	0	49.203	12	7	150	6	1	747	83.7	6.86	1876	7	0	0.951	0.998	0.628464	0.842813	95	115.8	97.8	84.1	114.1	93.1	97.7	121.1	81.4	5.83564e+07	7.11761e+07	6.00793e+07	5.16693e+07	7.00703e+07	5.73052e+07	5.99892e+07	7.45615e+07	5.00433e+07
Q9WVD4	H(+)/Cl(-) exchange transporter 5 OS=Mus musculus OX=10090 GN=Clcn5 PE=1 SV=1	chloride voltage-gated channel 5	CLCN5	Plasma Membrane	ion channel	12	0	164.934	22	12	426	10	1	746	83	7.01	6475	12	2	0.759	0.862	0.010479	0.015248	118.1	116.9	125.8	89.7	66.6	90.7	102.7	101.8	87.6	3.9211e+08	3.88119e+08	4.17899e+08	2.97716e+08	2.20968e+08	3.01221e+08	3.41211e+08	3.39038e+08	2.90713e+08
O35454	Chloride transport protein 6 OS=Mus musculus OX=10090 GN=Clcn6 PE=1 SV=1	chloride voltage-gated channel 6	CLCN6	Plasma Membrane	ion channel	7	0	14.123	5	2	4	2	1	870	96.9	7.02	58	2	0	1.035	1.386	0.657006	0.795593	87.5	70.6	145.3	89.4	90.5	91	124.7	79.7	121.3	499979	408996	832329	515947	526857	526012	722823	467434	701491
O70496	H(+)/Cl(-) exchange transporter 7 OS=Mus musculus OX=10090 GN=Clcn7 PE=1 SV=1	chloride voltage-gated channel 7	CLCN7	Plasma Membrane	ion channel	11	0	185.734	20	12	209	12	1	803	88.7	7.27	2531	12	0	0.617	0.688	0.141681	0.217183	84.3	137.2	151.6	77.3	95.4	84.6	94.4	107.5	67.7	1.00571e+08	1.63727e+08	1.80583e+08	9.23813e+07	1.13942e+08	1.03779e+08	1.1317e+08	1.28135e+08	8.14375e+07
Q9WUB6	Chloride channel protein ClC-Kb OS=Mus musculus OX=10090 GN=Clcnkb PE=1 SV=2	chloride voltage-gated channel Ka	CLCNKA	Plasma Membrane	ion channel	8	0	108.931	18	9	165	6	1	687	75	7.72	2098	9	3	1.931	2.619	0.02941	0.08314	81.7	48.8	55	129	93.9	106.1	165.9	75.6	143.9	5.02108e+07	3.00459e+07	3.37855e+07	7.94611e+07	5.77066e+07	6.52341e+07	1.01964e+08	4.64359e+07	8.84323e+07
Q9WUB7	Chloride channel protein ClC-Ka OS=Mus musculus OX=10090 GN=Clcnka PE=1 SV=2	chloride voltage-gated channel Kb	CLCNKB	Plasma Membrane	ion channel	10	0	76.139	13	7	109	4	1	687	75.6	8.98	1233	7	0	2.019	2.461	0.009946	0.021445	68	56.8	49.5	134	114.7	95.7	149.9	91.5	139.8	1.18548e+07	9.93363e+06	8.63815e+06	2.33781e+07	2.01036e+07	1.67272e+07	2.62403e+07	1.6136e+07	2.43595e+07
Q9Z0S6	Claudin-10 OS=Mus musculus OX=10090 GN=Cldn10 PE=1 SV=2	claudin 10	CLDN10	Plasma Membrane	other	4	0	15.489	6	1	2	1	1	231	24.7	7.8	93	1	0	1.304	1.097	0.1616	0.26784	92.8	100.7	54.5	121	133.6	91.2	110.5	93.8	101.8	5.27508e+06	5.7272e+06	3.12482e+06	6.72111e+06	7.37845e+06	5.27697e+06	6.23554e+06	5.18986e+06	5.88299e+06
Q9ET43	Claudin-12 OS=Mus musculus OX=10090 GN=Cldn12 PE=1 SV=2	claudin 12	CLDN12	Plasma Membrane	other	4	0	11.315	6	1	3	1	1	244	27	8.47	140	1	0	1.416	1.541	0.229544	0.135095	61.4	109.3	67.2	95.1	140.2	93.8	103.5	103	126.5	1.32366e+06	2.35093e+06	1.45685e+06	2.04821e+06	3.02528e+06	2.02329e+06	2.23462e+06	2.23428e+06	2.72449e+06
Q9Z0G9	Claudin-3 OS=Mus musculus OX=10090 GN=Cldn3 PE=1 SV=1	claudin 3	CLDN3	Plasma Membrane	transmembrane receptor	4	0.058	2.034	3	1	5	1	1	219	23.3	7.77	30	1	0	1.444	1.614	0.684469	0.439734	145.2	63.7	43.5	152.1	61.9	92	144.1	94.6	102.8	2.59093e+06	1.13331e+06	773293	2.70633e+06	1.10119e+06	1.6546e+06	2.56383e+06	1.68196e+06	1.82967e+06
Q9CQX5	Claudin domain-containing protein 1 OS=Mus musculus OX=10090 GN=Cldnd1 PE=1 SV=1	claudin domain containing 1	CLDND1	Plasma Membrane	other	4	0.012	3.635	4	1	5	1	1	253	28.6	6.1	15	1	0	1.146	1.334	0.89338	0.266985	119.2	53.6	90.1	103.3	56	114.8	120.2	90.9	151.9	3.90758e+06	1.75263e+06	2.94506e+06	3.37611e+06	1.90155e+06	3.75567e+06	3.92867e+06	3.06308e+06	4.99264e+06
P49300	C-type lectin domain family 10 member A OS=Mus musculus OX=10090 GN=Clec10a PE=1 SV=1	C-type lectin domain containing 10A	CLEC10A	Plasma Membrane	other	1	0	15.489	7	1	7	1	1	304	34.6	5.55	237	1	0	0.884	1.132	0.931036	0.227648	87	75	92.5	114.3	67.5	76.9	98.3	190.1	98.5	3.36404e+06	2.88479e+06	3.55801e+06	4.39847e+06	2.83068e+06	2.95852e+06	3.8657e+06	7.54099e+06	3.79467e+06
Q8VCP9	C-type lectin domain family 14 member A OS=Mus musculus OX=10090 GN=Clec14a PE=1 SV=2	C-type lectin domain containing 14A	CLEC14A	Cytoplasm	other	1	0	10.77	5	1	3	1	1	459	49	6.44	42	1	0	1.334	1.111	0.300552	0.754139	117.5	73.7	74.8	142.5	99.8	97.1	146.1	65.4	83.1	1.80601e+06	1.09896e+06	1.11027e+06	2.23691e+06	1.48515e+06	1.44111e+06	2.16876e+06	977356	1.23601e+06
Q9JL99	C-type lectin domain family 1 member B OS=Mus musculus OX=10090 GN=Clec1b PE=1 SV=1	C-type lectin domain family 1 member B	CLEC1B	Plasma Membrane	transmembrane receptor	1	0	23.576	14	3	9	3	1	229	26.2	8.72	51	3	0	22.566	10.965	0.145627	0.181536	9.6	7.1		186.7	276.1	53	90.7	54.4	222.3	1.01377e+06	814372		1.96135e+07	2.90663e+07	5.76973e+06	9.53124e+06	5.71642e+06	2.3444e+07
Q91V08	C-type lectin domain family 2 member D OS=Mus musculus OX=10090 GN=Clec2d PE=1 SV=1	C-type lectin domain family 2, member d	Clec2d (includes others)	Plasma Membrane	transmembrane receptor	1	0	18.49	11	2	23	2	1	207	23.6	7.62	937	2	0	0.996	1.164	0.69917	0.257626	81.8	108.3	93.1	92.7	114.1	89.9	114.9	108.4	96.8	8.14319e+06	1.10538e+07	9.42458e+06	9.20355e+06	1.14354e+07	8.96596e+06	1.14179e+07	1.08973e+07	9.67377e+06
Q6QLQ4	C-type lectin domain family 7 member A OS=Mus musculus OX=10090 GN=Clec7a PE=1 SV=3	C-type lectin domain containing 7A	CLEC7A	Plasma Membrane	transmembrane receptor	1	0.001	9.094	4	1	11	1	1	244	27.4	6.73	285	1	0	1.552	1.985	0.153	0.032943	63.2	40.2	100.4	90	119	98.1	118.3	125.5	145.4	1.52708e+06	975698	2.42295e+06	2.16669e+06	2.87752e+06	2.36993e+06	2.84738e+06	3.02315e+06	3.51874e+06
Q5M6W3	Clathrin heavy chain linker domain-containing protein 1 OS=Mus musculus OX=10090 GN=Clhc1 PE=2 SV=1	clathrin heavy chain linker domain containing 1	CLHC1	Other	other	0	0.066	1.956	4	1	1	1	1	596	69.4	8.25	0	1	0	0.282	0.406	0.046126	0.093368	137.9	167.5	266.4	38.1	106.4	47.3	62.2		74.3	346854	420843	669400	95854.8	267494	146758	159734		195600
Q9Z1Q5	Chloride intracellular channel protein 1 OS=Mus musculus OX=10090 GN=Clic1 PE=1 SV=3	chloride intracellular channel 1	CLIC1	Nucleus	ion channel	0	0	263.829	83	17	538	16	1	241	27	5.17	7405	17	0	0.831	0.714	0.776652	0.378598	61.6	110.6	170.2	79.4	91.9	138.2	79	76.7	92.4	1.60517e+08	2.88129e+08	4.43404e+08	2.07091e+08	2.39564e+08	3.60284e+08	2.0598e+08	2.00223e+08	2.40766e+08
Q9QYB1	Chloride intracellular channel protein 4 OS=Mus musculus OX=10090 GN=Clic4 PE=1 SV=3	chloride intracellular channel 4	CLIC4	Plasma Membrane	ion channel	0	0	327.162	78	19	612	17	1	253	28.7	5.59	9814	19	2	0.623	0.774	0.738448	0.306657	65.4	116.4	176.4	58	72.5	175.2	52	90.2	93.9	1.59982e+08	2.83929e+08	4.3029e+08	1.41587e+08	1.76988e+08	4.29883e+08	1.26781e+08	2.20923e+08	2.29119e+08
Q8BXK9	Chloride intracellular channel protein 5 OS=Mus musculus OX=10090 GN=Clic5 PE=1 SV=1	chloride intracellular channel 5	CLIC5	Cytoplasm	ion channel	0	0	402.789	79	18	582	14	1	251	28.3	5.94	10705	18	0	0.789	0.776	0.996229	0.51698	54.1	145.7	121.3	82.1	95.8	143.7	62.1	101.2	94.1	1.60639e+08	4.26372e+08	3.54968e+08	2.40072e+08	2.80347e+08	4.20532e+08	1.81707e+08	2.96054e+08	2.75602e+08
Q8BHB9	Chloride intracellular channel protein 6 OS=Mus musculus OX=10090 GN=Clic6 PE=1 SV=1	chloride intracellular channel 6	CLIC6	Plasma Membrane	ion channel	0	0	77.302	10	6	86	3	1	596	62.8	4.32	1601	6	0	1.036	1.551	0.877703	0.432555	18	56.9	113.4	18.5	59	93.5	12.1	88.3	440.4	239538	672362	1.33635e+06	227355	693016	1.10259e+06	154512	1.03641e+06	5.17063e+06
Q99KN9	Clathrin interactor 1 OS=Mus musculus OX=10090 GN=Clint1 PE=1 SV=2	clathrin interactor 1	CLINT1	Cytoplasm	other	0	0	27.419	6	3	25	3	1	631	68.5	6.25	36	3	0	0.95	0.768	0.682104	0.167174	110.7	125	83.4	104.4	128.8	105.2	93.8	85.1	63.7	1.90689e+07	2.15755e+07	1.44254e+07	1.79729e+07	2.21886e+07	1.81837e+07	1.62457e+07	1.47268e+07	1.09686e+07
Q922J3	CAP-Gly domain-containing linker protein 1 OS=Mus musculus OX=10090 GN=Clip1 PE=1 SV=1	CAP-Gly domain containing linker protein 1	CLIP1	Cytoplasm	other	0	0	10.371	1	1	1	1	1	1391	155.7	5.24	41	1	0	present in sham only	1.27			396.4						503.6			958601						1.21784e+06
Q8C5W0	Calmin OS=Mus musculus OX=10090 GN=Clmn PE=1 SV=2	calmin	CLMN	Cytoplasm	other	1	0.114	1.551	1	1	1	1	1	1052	117.2	5.03	0	1	0	1.181	1.29	0.435692	0.267624	90.7	81.1	95.6	116.5	76.8	107.1	135.3	80	117	3.3014e+07	2.95801e+07	3.48162e+07	4.25053e+07	2.797e+07	3.89804e+07	4.92693e+07	2.91205e+07	4.25895e+07
Q61124	Battenin OS=Mus musculus OX=10090 GN=Cln3 PE=1 SV=2	CLN3 lysosomal/endosomal transmembrane protein, battenin	CLN3	Cytoplasm	other	8	0	24.672	8	2	17	2	1	438	47.6	5.44	127	2	0	0.7	0.785	0.161135	0.187373	109.9	105.3	159.5	77	55.7	115.3	77.3	86.3	113.5	2.18497e+06	2.06016e+06	3.11456e+06	1.50707e+06	1.09744e+06	2.2793e+06	1.51145e+06	1.70172e+06	2.23117e+06
Q60649	Caseinolytic peptidase B protein homolog OS=Mus musculus OX=10090 GN=Clpb PE=1 SV=1	ClpB homolog, mitochondrial AAA ATPase chaperonin	CLPB	Nucleus	transcription regulator	0	0	13.469	3	2	5	2	1	677	76	8.51	79	2	0	0.785	0.539	0.587651	0.228433	80	142.4	130.1	61.3	137.6	102.1	70.1	113.8	62.5	4.15229e+06	7.15563e+06	6.55922e+06	3.08549e+06	6.94335e+06	5.29224e+06	3.80716e+06	5.73337e+06	3.25045e+06
O88696	ATP-dependent Clp protease proteolytic subunit, mitochondrial OS=Mus musculus OX=10090 GN=Clpp PE=1 SV=1	caseinolytic mitochondrial matrix peptidase proteolytic subunit	CLPP	Cytoplasm	peptidase	0	0.084	1.789	4	1	2	1	1	272	29.8	7.47	0	1	0
Q8VBZ3	Cleft lip and palate transmembrane protein 1 homolog OS=Mus musculus OX=10090 GN=Clptm1 PE=1 SV=1	CLPTM1 regulator of GABA type A receptor forward trafficking	CLPTM1	Plasma Membrane	other	5	0	83.121	14	7	127	7	1	664	75.2	6.3	1854	7	0	0.965	1.037	0.821977	0.767165	103	69.5	126.6	99.3	79	107.4	110.1	106.8	98.3	3.87189e+07	2.60386e+07	4.73709e+07	3.72438e+07	2.9551e+07	4.01745e+07	4.12431e+07	4.00462e+07	3.6845e+07
Q8BXA5	Cleft lip and palate transmembrane protein 1-like protein OS=Mus musculus OX=10090 GN=Clptm1l PE=1 SV=1	CLPTM1 like	CLPTM1L	membrane	other	5	0	15.489	3	1	5	1	1	539	62.1	8.84	89	1	0	1.051	1.156	0.636886	0.319336	93.5	72.5	107.5	107.4	86.1	98.2	138.9	87.9	108	2.1023e+06	1.61985e+06	2.39934e+06	2.40168e+06	1.92383e+06	2.19303e+06	3.12315e+06	1.96633e+06	2.43387e+06
Q9JHS4	ATP-dependent Clp protease ATP-binding subunit clpX-like, mitochondrial OS=Mus musculus OX=10090 GN=Clpx PE=1 SV=2	caseinolytic mitochondrial matrix peptidase chaperone subunit	CLPX	Cytoplasm	enzyme	0	0	28.502	6	3	24	3	1	634	69.2	7.71	491	3	0	1.191	0.905	0.223407	0.96242	92.4	90.5	98.8	132.8	110.1	91.5	121.9	78.3	83.6	6.74759e+06	6.55159e+06	7.13234e+06	9.59693e+06	8.07255e+06	6.64213e+06	8.84697e+06	5.6346e+06	6.14931e+06
Q8BHH8	Clarin-3 OS=Mus musculus OX=10090 GN=Clrn3 PE=1 SV=1	clarin 3	CLRN3	Cytoplasm	other	4	0.004	4.932	4	1	12	1	1	226	25.3	8.91	112	1	0	0.655	0.98	0.022941	0.862621	126.4	115.7	101.6	75.8	55.8	87	98.1	126.2	113.4	2.21284e+06	2.01797e+06	1.76511e+06	1.31881e+06	971718	1.52282e+06	1.71546e+06	2.19135e+06	1.96989e+06
O08585	Clathrin light chain A OS=Mus musculus OX=10090 GN=Clta PE=1 SV=2	clathrin light chain A	CLTA	Plasma Membrane	other	0	0.001	7.57	8	3	14	3	1	235	25.6	4.58	289	3	0	1.73	1.293	0.070051	0.041947	65	83.3	72.6	98	125.6	180.8	85.7	93.8	95.2	1.10575e+07	1.41737e+07	1.23518e+07	1.66888e+07	2.13646e+07	3.07592e+07	1.46387e+07	1.59666e+07	1.62203e+07
Q6IRU5	Clathrin light chain B OS=Mus musculus OX=10090 GN=Cltb PE=1 SV=1	clathrin light chain B	CLTB	Plasma Membrane	other	0	0.025	2.734	3	1	15	1	1	229	25.2	4.63	196	1	0	1.282	1.304	0.217098	0.23966	64.8	75.1	88.7	96.3	91.4	201.5	97.9	73.5	110.7	3.29504e+06	3.81595e+06	4.5099e+06	4.90118e+06	4.65829e+06	1.02337e+07	4.99838e+06	3.7391e+06	5.62613e+06
Q68FD5	Clathrin heavy chain 1 OS=Mus musculus OX=10090 GN=Cltc PE=1 SV=3	clathrin heavy chain	CLTC	Plasma Membrane	other	0	0	1586.73	57	81	2224	81	1	1675	191.4	5.69	42243	81	0	1.52	1.186	0.050326	0.128714	76.5	80.2	94.4	96.3	121.9	131.8	95.2	91.6	112	1.09531e+09	1.14874e+09	1.35228e+09	1.37936e+09	1.74626e+09	1.88767e+09	1.36251e+09	1.31194e+09	1.6041e+09
Q9ESG4	Collectrin OS=Mus musculus OX=10090 GN=Tmem27 PE=1 SV=1	collectrin, amino acid transport regulator	CLTRN	Plasma Membrane	other	1	0	329.134	43	9	1489	9	1	222	25.1	5.85	23686	9	0	0.733	0.911	0.012698	0.169822	119.3	121.8	106.7	87.4	67.9	88.1	90.6	108.7	109.6	3.27237e+09	3.34406e+09	2.92833e+09	2.40039e+09	1.86274e+09	2.41812e+09	2.48544e+09	2.98247e+09	3.00748e+09
Q06890	Clusterin OS=Mus musculus OX=10090 GN=Clu PE=1 SV=1	clusterin	CLU	Cytoplasm	other	0	0	98.265	24	8	90	8	1	448	51.6	5.67	1391	8	0	2.07	4.353	0.029122	0.065574	43.7	40.5	46.4	132.7	76.7	90.4	211.9	67.7	190	1.37607e+07	1.31353e+07	1.47767e+07	4.19221e+07	2.47053e+07	2.84497e+07	6.74521e+07	2.13375e+07	5.98212e+07
Q5SW19	Clustered mitochondria protein homolog OS=Mus musculus OX=10090 GN=Cluh PE=1 SV=2	clustered mitochondria homolog	CLUH	Cytoplasm	translation regulator	0	0	147.973	15	15	141	15	1	1315	148	6.02	1650	15	0	1.323	1.141	0.01472	0.022238	88.6	86.9	75.7	115	124.6	103.1	108	98.9	99.1	5.88584e+07	5.77222e+07	5.01719e+07	7.62291e+07	8.25368e+07	6.8312e+07	7.15941e+07	6.55047e+07	6.568e+07
Q8R4N0	Citramalyl-CoA lyase, mitochondrial OS=Mus musculus OX=10090 GN=Clybl PE=1 SV=2	citrate lyase beta like	CLYBL	Cytoplasm	enzyme	0	0	31.121	15	3	30	3	1	338	37.5	8.54	543	3	0	1.368	1.081	0.241604	0.245277	76.4	89.3	95.7	122.8	79.7	122.1	127.5	90	96.5	4.56337e+06	5.37147e+06	5.73156e+06	7.33933e+06	4.77929e+06	7.3732e+06	7.62235e+06	5.384e+06	5.76851e+06
Q99KK2	N-acylneuraminate cytidylyltransferase OS=Mus musculus OX=10090 GN=Cmas PE=1 SV=2	cytidine monophosphate N-acetylneuraminic acid synthetase	CMAS	Nucleus	enzyme	0	0	31.947	10	3	26	3	1	432	48	8.1	227	3	0	0.732	0.704	0.65374	0.230376	119.8	80.7	137.1	87.7	86.4	131.2	84.4	102	70.7	3.55795e+06	2.34195e+06	4.14088e+06	2.55162e+06	2.51059e+06	3.82699e+06	2.4487e+06	2.96024e+06	2.06289e+06
Q8R1G2	Carboxymethylenebutenolidase homolog OS=Mus musculus OX=10090 GN=Cmbl PE=1 SV=1	carboxymethylenebutenolidase homolog	CMBL	Cytoplasm	enzyme	0	0	99.818	49	9	210	9	1	245	27.9	7.18	2262	9	0	1.609	1.246	0.092474	0.546308	108.9	58	80.6	137.5	101.5	129.6	110.5	73.1	100.4	2.9433e+07	1.58032e+07	2.18453e+07	3.71811e+07	2.74516e+07	3.5121e+07	2.99182e+07	1.9851e+07	2.71939e+07
Q9D486	C-Maf-inducing protein OS=Mus musculus OX=10090 GN=Cmip PE=1 SV=3	c-Maf inducing protein	CMIP	Cytoplasm	other	0	0	44.22	12	5	77	5	1	773	86.2	6.81	255	5	0	1.312	1.086	0.705918	0.996864	79.7	85.1	125.8	72.5	111.7	134.7	92.5	88.3	109.6	9.73784e+06	1.04011e+07	1.5373e+07	8.87383e+06	1.37027e+07	1.64563e+07	1.13088e+07	1.08867e+07	1.34036e+07
P97468	Chemokine-like receptor 1 OS=Mus musculus OX=10090 GN=Cmklr1 PE=1 SV=1	chemerin chemokine-like receptor 1	CMKLR1	Plasma Membrane	G-protein coupled receptor	7	0	15.489	5	1	3	1	1	371	41.8	8.31	109	1	0	0.404	0.57	0.00016	0.000888	170.3	148.7	152.1	63.1	56.3	61.5	72.7	86.7	88.6	5.278e+06	4.64598e+06	4.7485e+06	1.95822e+06	1.74527e+06	1.90612e+06	2.2628e+06	2.69551e+06	2.75552e+06
Q9DBP5	UMP-CMP kinase OS=Mus musculus OX=10090 GN=Cmpk1 PE=1 SV=1	cytidine/uridine monophosphate kinase 1	CMPK1	Nucleus	kinase	0	0	107.077	53	9	159	9	1	196	22.2	5.83	2512	9	0	1.739	1.776	0.032917	0.113189	74.6	59.1	77.8	129.7	90.3	130.7	132.5	72.6	132.7	4.422e+07	3.47658e+07	4.57637e+07	7.62939e+07	5.3095e+07	7.69e+07	7.79023e+07	4.26979e+07	7.82003e+07
Q3U5Q7	UMP-CMP kinase 2, mitochondrial OS=Mus musculus OX=10090 GN=Cmpk2 PE=1 SV=2	cytidine/uridine monophosphate kinase 2	CMPK2	Cytoplasm	kinase	0	0	11.929	9	3	7	3	1	447	50	7.27	16	3	0	1.687	1.348	0.050573	0.484417	68.5	73.6	97.4	124.1	106.4	160.6	99.2	71	99.2	6.0604e+07	6.56993e+07	8.96869e+07	1.09724e+08	9.54042e+07	1.45187e+08	8.77069e+07	6.32393e+07	8.86599e+07
Q8CJ61	CKLF-like MARVEL transmembrane domain-containing protein 4 OS=Mus musculus OX=10090 GN=Cmtm4 PE=1 SV=1	CKLF like MARVEL transmembrane domain containing 4	CMTM4	Extracellular Space	cytokine	4	0.001	7.404	9	2	4	2	1	208	22.9	5.59	64	2	0	0.869	0.679	0.536004	0.183669	157.3	84.9	114.8	136.1	59	99.8	78	71.3	98.9	2.45156e+06	1.3243e+06	1.77946e+06	2.10923e+06	914605	1.54736e+06	1.20861e+06	1.10685e+06	1.53314e+06
Q9CZ69	CKLF-like MARVEL transmembrane domain-containing protein 6 OS=Mus musculus OX=10090 GN=Cmtm6 PE=1 SV=1	CKLF like MARVEL transmembrane domain containing 6	CMTM6	Extracellular Space	cytokine	3	0	13.502	11	2	30	2	1	183	19.8	6.29	481	2	0	1.049	1.098	0.86839	0.816234	97	58.5	131.7	101.7	63	138.6	106.4	64.9	138.2	2.67136e+07	1.59143e+07	3.60415e+07	2.78308e+07	1.71796e+07	3.77282e+07	2.90855e+07	1.7653e+07	3.77912e+07
P53996	Cellular nucleic acid-binding protein OS=Mus musculus OX=10090 GN=Cnbp PE=1 SV=2	CCHC-type zinc finger nucleic acid binding protein	CNBP	Nucleus	transcription regulator	0	0.009	3.995	8	1	3	1	1	178	19.6	7.58	27	1	0	1.136	0.826	0.623697	0.407913	234.7	96.4	51.1	109.4	112.4	69.8	79.6	91.9	54.7	231918	100109	51253.8	108621	111051	68994.4	78585.7	90810.8	54168.1
Q9D1A2	Cytosolic non-specific dipeptidase OS=Mus musculus OX=10090 GN=Cndp2 PE=1 SV=1	carnosine dipeptidase 2	CNDP2	Cytoplasm	peptidase	0	0	382.784	75	28	462	28	1	475	52.7	5.66	4714	28	0	1.596	1.235	0.000755	0.085526	78.9	72.7	77.5	123.7	118	134.9	115.3	83.1	95.8	2.25972e+08	2.08177e+08	2.2197e+08	3.54236e+08	3.37973e+08	3.86288e+08	3.30022e+08	2.38673e+08	2.74387e+08
Q3UW12	Cyclic nucleotide-gated cation channel alpha-4 OS=Mus musculus OX=10090 GN=Cnga4 PE=2 SV=1	cyclic nucleotide gated channel subunit alpha 4	CNGA4	Plasma Membrane	ion channel	3	0.075	1.876	2	1	1	1	1	575	65.8	5.55	0	1	0	1.041	1.084	0.70254	0.870527	46.4	165.1	66.8	69.5	240.5	54.5	72.4	120.7	64	204284	602780	243592	253658	900644	213424	264168	440805	233455
Q9CX13	Protein cornichon homolog 4 OS=Mus musculus OX=10090 GN=Cnih4 PE=2 SV=1	cornichon family AMPA receptor auxiliary protein 4	CNIH4	Plasma Membrane	other	3	0	15.489	14	1	3	1	1	139	16.1	6.49	98	1	0	0.492	0.951	0.652489	0.632469	113.4	44.6	194.1	52.5	55.8	161.9	107.8	51	118.8	6.53541e+06	2.68198e+06	1.13733e+07	3.38755e+06	3.17007e+06	9.63996e+06	6.19187e+06	3.09005e+06	7.04504e+06
Q08091	Calponin-1 OS=Mus musculus OX=10090 GN=Cnn1 PE=1 SV=1	calponin 1	CNN1	Cytoplasm	other	0	0.001	7.6	7	2	2	2	1	297	33.3	8.97	23	2	0	0.598	1.14	0.028344	0.882788	125.1	117.7	106.6	93.9	52.3	70.3	152.1	134.2	47.7	4.3768e+06	4.09971e+06	3.69986e+06	3.28708e+06	1.92276e+06	2.44315e+06	5.27851e+06	4.67393e+06	1.66766e+06
Q08093	Calponin-2 OS=Mus musculus OX=10090 GN=Cnn2 PE=1 SV=1	calponin 2	CNN2	Cytoplasm	other	0	0	34.538	14	3	31	2	1	305	33.1	7.62	147	3	0	1.083	0.815	0.399725	0.538974	98.4	77	117.2	106.6	143.3	95.2	75.9	80.2	106.3	7.79253e+06	5.84625e+06	9.17847e+06	7.99851e+06	1.12809e+07	7.19419e+06	5.82139e+06	6.40923e+06	8.2341e+06
Q9DAW9	Calponin-3 OS=Mus musculus OX=10090 GN=Cnn3 PE=1 SV=1	calponin 3	CNN3	Cytoplasm	other	0	0	81.393	28	5	92	4	1	330	36.4	5.72	610	5	1	0.948	1.154	0.812362	0.88735	105.6	73.6	121	103.2	85.5	100.1	124.1	65	121.9	1.33356e+07	9.59304e+06	1.52926e+07	1.3034e+07	1.08635e+07	1.28302e+07	1.57152e+07	8.5406e+06	1.54531e+07
Q3TWN3	Metal transporter CNNM2 OS=Mus musculus OX=10090 GN=Cnnm2 PE=1 SV=3	cyclin and CBS domain divalent metal cation transport mediator 2	CNNM2	Plasma Membrane	transporter	4	0	58.953	8	5	88	4	1	875	96.6	6.21	803	5	1	1.206	1.493	0.052296	0.146637	92.5	79	85.2	108	93.4	102.7	127.2	83.5	128.3	1.36803e+07	1.16936e+07	1.27467e+07	1.59262e+07	1.43094e+07	1.52741e+07	1.88049e+07	1.28509e+07	1.90378e+07
Q32NY4	Metal transporter CNNM3 OS=Mus musculus OX=10090 GN=Cnnm3 PE=1 SV=2	cyclin and CBS domain divalent metal cation transport mediator 3	CNNM3	Plasma membrane	other	5	0	129.206	25	11	159	11	1	713	76.2	5.58	1923	11	0	0.908	0.8	0.355059	0.201013	105.5	120.7	102.2	115	95.8	84.4	80.4	111.6	84.4	4.29162e+07	4.90182e+07	4.15695e+07	4.72821e+07	4.04107e+07	3.43047e+07	3.26868e+07	4.67472e+07	3.44717e+07
Q69ZF7	Metal transporter CNNM4 OS=Mus musculus OX=10090 GN=Cnnm4 PE=1 SV=2	cyclin and CBS domain divalent metal cation transport mediator 4	CNNM4	Plasma Membrane	transporter	4	0	31.402	7	4	42	3	1	771	86.6	6.07	407	4	0	0.95	1.095	0.95298	0.514674	102	84.3	106.9	98.8	96.3	96.8	113.3	90	111.7	8.53081e+06	7.04323e+06	8.93437e+06	8.25622e+06	8.07222e+06	8.09007e+06	9.48062e+06	7.54194e+06	9.33921e+06
Q6ZQ08	CCR4-NOT transcription complex subunit 1 OS=Mus musculus OX=10090 GN=Cnot1 PE=1 SV=2	CCR4-NOT transcription complex subunit 1	CNOT1	Cytoplasm	other	0	0	14.098	1	2	9	2	1	2375	266.6	7.11	104	2	0	1.124	0.978	0.479276	0.661903	111.9	16.9	123.3	125.8	84.3	127.5	140.9	59.9	109.5	5.50264e+06	1.7727e+06	6.05589e+06	6.18507e+06	4.14144e+06	6.26277e+06	6.95365e+06	2.9593e+06	5.37623e+06
Q9JKY0	CCR4-NOT transcription complex subunit 9 OS=Mus musculus OX=10090 GN=Cnot9 PE=1 SV=1	CCR4-NOT transcription complex subunit 9	CNOT9	Cytoplasm	other	0	0.029	2.613	3	1	2	1	1	299	33.6	8.03	0	1	0	1.279	1.25	0.564859	0.985953	87.3	71.5	128.2	111.6	85.1	130.6	109.1	63.7	112.9	1.62835e+06	1.3431e+06	2.3252e+06	2.03307e+06	1.54719e+06	2.38994e+06	1.99908e+06	1.15533e+06	2.04492e+06
P16330	2',3'-cyclic-nucleotide 3'-phosphodiesterase OS=Mus musculus OX=10090 GN=Cnp PE=1 SV=3	2',3'-cyclic nucleotide 3' phosphodiesterase	CNP	Cytoplasm	enzyme	0	0	56.101	17	4	52	4	1	420	47.1	8.97	877	4	0	1.409	1.322	0.078769	0.291348	76.9	68.5	103.2	105	109.5	108.3	101.7	80.7	146.2	7.04419e+06	6.27021e+06	9.44359e+06	9.61079e+06	1.00543e+07	9.93828e+06	9.30362e+06	7.38481e+06	1.33796e+07
Q9QXT0	Protein canopy homolog 2 OS=Mus musculus OX=10090 GN=Cnpy2 PE=1 SV=1	canopy FGF signaling regulator 2	CNPY2	Plasma Membrane	other	0	0	74.901	36	5	83	5	1	182	20.8	5.07	3110	5	0	1.256	0.901	0.058133	0.336625	81.7	110	93.1	116.9	135	115	83.8	95.3	69.1	1.38764e+07	1.87035e+07	1.58892e+07	1.98859e+07	2.29345e+07	1.95712e+07	1.42446e+07	1.63359e+07	1.18585e+07
O88507	Ciliary neurotrophic factor receptor subunit alpha OS=Mus musculus OX=10090 GN=Cntfr PE=1 SV=2	ciliary neurotrophic factor receptor	CNTFR	Plasma Membrane	transmembrane receptor	0	0	18.238	9	2	8	2	1	372	40.8	6.83	111	2	0	1.167	0.869	0.188719	0.983976	103.9	76.1	89.9	100.5	153.5	105	78.1	123.8	69.2	5.21702e+06	3.81803e+06	4.51498e+06	5.19074e+06	7.82518e+06	5.26597e+06	3.97461e+06	6.22061e+06	3.47913e+06
P68500	Contactin-5 OS=Mus musculus OX=10090 GN=Cntn5 PE=1 SV=2	contactin 5	CNTN5	Plasma Membrane	other	0	0.042	2.306	1	1	4	1	1	1098	120.7	6.61	85	1	0	1.091	0.398	0.902703	0.655423	73.1	72.3	200.2	79.8	13.5	223	8	29.1	201	254174	235735	648974	255554	77299.8	730528	27765.1	137572	649586
Q9D2R6	Cytochrome c oxidase assembly factor 3 homolog, mitochondrial OS=Mus musculus OX=10090 GN=Coa3 PE=1 SV=1	cytochrome c oxidase assembly factor 3	COA3	Cytoplasm	other	1	0	15.892	19	2	38	2	1	108	12	9.86	873	2	0	0.719	0.924	0.14114	0.575523	88	112.2	142.7	95.9	80.6	70.5	88.3	103.6	118.1	1.46706e+07	1.8695e+07	2.394e+07	1.58518e+07	1.35291e+07	1.1761e+07	1.47224e+07	1.73904e+07	1.95946e+07
Q8BGD8	Cytochrome c oxidase assembly factor 6 homolog OS=Mus musculus OX=10090 GN=Coa6 PE=1 SV=1	cytochrome c oxidase assembly factor 6	Coa6	Cytoplasm	other	0	0	15.489	14	1	13	1	1	79	9.3	8.16	685	1	0	0.836	0.714	0.469923	0.056265	119.5	97.6	135.6	137.3	48.6	99.9	83.2	93.1	85.2	1.34743e+06	1.10268e+06	1.52851e+06	1.54687e+06	548073	1.12643e+06	938380	1.05353e+06	970981
Q9DBL7	Bifunctional coenzyme A synthase OS=Mus musculus OX=10090 GN=Coasy PE=1 SV=2	Coenzyme A synthase	COASY	Cytoplasm	kinase	0	0	243.937	44	16	285	16	1	563	62	7.11	2540	16	0	1.17	1.258	0.100001	0.032001	89.1	76.9	88.1	103.1	92	124	118.9	97	110.8	9.45694e+07	8.16261e+07	9.35537e+07	1.09412e+08	9.79372e+07	1.31639e+08	1.26184e+08	1.0346e+08	1.17604e+08
Q5NBX1	Protein cordon-bleu OS=Mus musculus OX=10090 GN=Cobl PE=1 SV=1	cordon-bleu WH2 repeat protein	COBL	Plasma Membrane	other	0	0	20.825	4	5	8	5	1	1337	143.8	7.77	136	5	0	0.801	1.009	0.805512	0.890037	52.2	159.3	93.3	55.1	142.6	74.8	71	157.5	94.2	5.70047e+06	1.73528e+07	1.01789e+07	6.00491e+06	1.5547e+07	8.14787e+06	7.73236e+06	1.71838e+07	1.02668e+07
Q3UMF0	Cordon-bleu protein-like 1 OS=Mus musculus OX=10090 GN=Cobll1 PE=1 SV=2	cordon-bleu WH2 repeat protein like 1	COBLL1	Extracellular Space	other	0	0	514.052	40	35	595	35	1	1273	137.3	8.16	7840	35	0	0.697	0.664	0.307868	0.26119	81.6	146.1	127.8	74.7	113.6	89.1	70.8	111.3	84.9	3.16794e+08	5.64154e+08	4.94052e+08	2.88298e+08	4.38498e+08	3.44184e+08	2.73308e+08	4.2974e+08	3.28029e+08
Q9Z160	Conserved oligomeric Golgi complex subunit 1 OS=Mus musculus OX=10090 GN=Cog1 PE=1 SV=3	component of oligomeric golgi complex 1	COG1	Cytoplasm	transporter	0	0.047	2.201	1	1	2	1	1	980	109	7.18	31	1	0	0.965	0.979	0.918207	0.770098	96.8	52.8	156.4	93.4	131.1	92.2	102.1	94.8	80.3	668530	360981	1.03811e+06	649672	877805	621086	712649	735280	573239
Q921L5	Conserved oligomeric Golgi complex subunit 2 OS=Mus musculus OX=10090 GN=Cog2 PE=1 SV=2	component of oligomeric golgi complex 2	COG2	Cytoplasm	other	0	0	15.413	5	2	7	2	1	731	82	6.21	191	2	0	1.275	0.961	0.346677	0.345333	81.4	116.4	88.9	113.4	159.3	88.5	80.1	86.5	85.4	1.61355e+06	2.29757e+06	1.75932e+06	2.23929e+06	3.18193e+06	1.75285e+06	1.58296e+06	1.70801e+06	1.688e+06
Q8CI04	Conserved oligomeric Golgi complex subunit 3 OS=Mus musculus OX=10090 GN=Cog3 PE=1 SV=3	component of oligomeric golgi complex 3	COG3	Cytoplasm	other	0	0.01	3.924	1	1	2	1	1	820	93.2	5.78	43	1	0	1.342	1.095	0.511536	0.742906	78.1	119.8	93.3	135	125.2	77.5	107.5	102.2	61.5	1.2931e+06	2.02422e+06	1.57027e+06	2.23721e+06	2.09305e+06	1.28326e+06	1.78541e+06	1.73678e+06	1.04631e+06
Q8R1U1	Conserved oligomeric Golgi complex subunit 4 OS=Mus musculus OX=10090 GN=Cog4 PE=1 SV=1	component of oligomeric golgi complex 4	COG4	Cytoplasm	transporter	0	0.016	3.267	1	1	3	1	1	785	88.6	5.15	28	1	0	1.218	1.298	0.903395	0.587498	79.3	77.6	133.9	113.9	96.6	71.7	97.9	102.9	126.1	1.60958e+06	1.61704e+06	2.71426e+06	2.31143e+06	1.95728e+06	1.45336e+06	2.02514e+06	2.143e+06	2.58707e+06
Q3UM29	Conserved oligomeric Golgi complex subunit 7 OS=Mus musculus OX=10090 GN=Cog7 PE=1 SV=1	component of oligomeric golgi complex 7	COG7	Cytoplasm	transporter	0	0.021	2.942	1	1	1	1	1	770	86	5.38	31	1	0	0.917	0.758	0.81386	0.366876	76	116.9	117.8	93.6	122	107.2	96.7	88.6	81.2	1.96278e+06	3.02286e+06	3.04906e+06	2.4362e+06	3.1857e+06	2.77974e+06	2.5408e+06	2.28861e+06	2.09787e+06
Q61245	Collagen alpha-1(XI) chain OS=Mus musculus OX=10090 GN=Col11a1 PE=1 SV=2	collagen type XI alpha 1 chain	COL11A1	Extracellular Space	other	0	0.061	2.016	1	1	1	1	1	1804	180.9	5.21	0	1	0
Q64739	Collagen alpha-2(XI) chain OS=Mus musculus OX=10090 GN=Col11a2 PE=2 SV=3	collagen type XI alpha 2 chain	COL11A2	Extracellular Space	other	1	0.022	2.87	1	1	2	1	1	1736	171.4	6.48	0	1	0	1.787	1.322				219			391.5			289.5			371332			664208			493794
Q80X19	Collagen alpha-1(XIV) chain OS=Mus musculus OX=10090 GN=Col14a1 PE=1 SV=2	collagen type XIV alpha 1 chain	COL14A1	Extracellular Space	other	1	0	21.694	5	4	20	4	1	1797	192.9	5.1	145	4	0	2.447	1.408	0.155276	0.852868	63.3	54.9	123.2	90.6	155.5	155	113.2	89.2	55.2	1.02199e+06	879656	1.9712e+06	1.44679e+06	2.48712e+06	2.47652e+06	1.80984e+06	1.42442e+06	882139
O35206	Collagen alpha-1(XV) chain OS=Mus musculus OX=10090 GN=Col15a1 PE=1 SV=2	collagen type XV alpha 1 chain	COL15A1	Extracellular Space	other	0	0.016	3.322	1	1	15	1	1	1367	140.4	4.89	104	1	0	1.358	0.964	0.33256	0.739925	67.4	90.8	127.4	101	123.3	124.2	87.5	78.9	99.5	839488	1.13271e+06	1.60705e+06	1.25887e+06	1.54845e+06	1.54698e+06	1.1073e+06	1.00727e+06	1.23927e+06
P39061	Collagen alpha-1(XVIII) chain OS=Mus musculus OX=10090 GN=Col18a1 PE=1 SV=4	collagen type XVIII alpha 1 chain	COL18A1	Extracellular Space	other	0	0	10.585	2	3	12	3	1	1774	182.1	5.62	44	3	0	0.844	0.955	0.837171	0.577938	66.9	111	108.9	91.9	129	79.5	103.1	104	105.8	7.00788e+06	1.17114e+07	1.16271e+07	9.74193e+06	1.39466e+07	8.4237e+06	1.09581e+07	1.12879e+07	1.12572e+07
P02463	Collagen alpha-1(IV) chain OS=Mus musculus OX=10090 GN=Col4a1 PE=1 SV=4	collagen type IV alpha 1 chain	COL4A1	Extracellular Space	other	0	0	13.425	1	1	5	1	1	1669	160.6	8.24	62	1	0	Present in 4h only	Present in 8h only						131	136.8	175.5	193.9	141.6	121.3				877002	916123	1.17542e+06	1.29826e+06	948272	812389
Q04857	Collagen alpha-1(VI) chain OS=Mus musculus OX=10090 GN=Col6a1 PE=1 SV=1	collagen type VI alpha 1 chain	COL6A1	Extracellular Space	other	0	0	14.074	2	1	1	1	1	1025	108.4	5.36	62	1	0	0.959	0.672	0.541673	0.512034		105	98.1	97.3	255	93.8	68.2	120.7	61.9		1.39068e+06	1.3e+06	1.28932e+06	3.3904e+06	1.24284e+06	904795	1.60265e+06	820968
Q02788	Collagen alpha-2(VI) chain OS=Mus musculus OX=10090 GN=Col6a2 PE=1 SV=3	collagen type VI alpha 2 chain	COL6A2	Extracellular Space	other	0	0	46.032	3	2	28	2	1	1034	110.3	6.42	69	2	0	1.583	1.278	0.305544	0.521922	75.4	59.7	120	80.6	150.8	119.4	96.4	106.4	91.4	4.5631e+06	3.60954e+06	7.24562e+06	4.88136e+06	9.10678e+06	7.24762e+06	5.81891e+06	6.42491e+06	5.57841e+06
Q8K4Q8	Collectin-12 OS=Mus musculus OX=10090 GN=Colec12 PE=1 SV=1	collectin subfamily member 12	COLEC12	Plasma Membrane	transmembrane receptor	1	0	28.018	8	5	26	5	1	742	81.3	5.49	500	5	0	1.423	1.126	0.124765	0.143717	83.8	84.3	79.3	119.2	127.7	82.2	135.6	93.5	94.4	1.24948e+07	1.25833e+07	1.18239e+07	1.7819e+07	1.90383e+07	1.22521e+07	2.03306e+07	1.39619e+07	1.40997e+07
Q8K297	Procollagen galactosyltransferase 1 OS=Mus musculus OX=10090 GN=Colgalt1 PE=1 SV=2	collagen beta(1-O)galactosyltransferase 1	COLGALT1	Cytoplasm	enzyme	0	0.006	4.509	1	1	3	1	1	617	71	7.28	80	1	0	1.629	1.593	0.155495	0.143047	60.4	62.7	99.2	93.5	171	102.2	88	123.2	99.9	510792	549243	837013	789973	1.46819e+06	865947	747482	1.04385e+06	845796
Q8BXC6	COMM domain-containing protein 2 OS=Mus musculus OX=10090 GN=Commd2 PE=1 SV=1	COMM domain containing 2	COMMD2	Other	other	0	0.028	2.674	5	1	1	1	1	199	22.8	6.62	45	1	0	1.355	1.156	0.3712	0.982139	73.4	120.7	74.2	87.7	174	100.5	101.9	85.7	81.9	2.94091e+06	4.79841e+06	2.97358e+06	3.48956e+06	7.09419e+06	3.9889e+06	4.11022e+06	3.67097e+06	3.2556e+06
Q63829	COMM domain-containing protein 3 OS=Mus musculus OX=10090 GN=Commd3 PE=1 SV=1	COMM domain containing 3	COMMD3	Extracellular Space	other	0	0	35.176	20	3	23	3	1	195	22	5.59	177	3	0	1.047	0.856	0.246127	0.928598	76.3	98	99.9	96.7	149.1	102.6	109.9	83.7	83.9	3.78922e+06	4.86942e+06	4.96891e+06	4.80753e+06	7.40775e+06	5.09523e+06	5.45489e+06	4.15415e+06	4.16715e+06
Q9CQ02	COMM domain-containing protein 4 OS=Mus musculus OX=10090 GN=Commd4 PE=1 SV=1	COMM domain containing 4	COMMD4	Cytoplasm	other	0	0.009	4.004	10	1	7	1	1	199	21.8	6.67	29	1	0	1.666	1.353	0.38007	0.781208	68.2	34.3	150	137.1	106.9	113.6	140.8	56.9	92.3	163213	84711.6	351913	333329	250823	266803	340240	135869	216522
Q8R395	COMM domain-containing protein 5 OS=Mus musculus OX=10090 GN=Commd5 PE=1 SV=1	COMM domain containing 5	COMMD5	Nucleus	other	0	0.004	4.778	8	1	1	1	1	224	24.5	8.06	0	1	0	0.714	0.825	0.795459	0.819978	125.6	42.1	152.8	89.8	68.3	130.8	103.7	52.4	134.5	1.0167e+06	337242	1.23298e+06	718558	555211	1.04833e+06	829874	435781	1.07662e+06
O88587	Catechol O-methyltransferase OS=Mus musculus OX=10090 GN=Comt PE=1 SV=2	catechol-O-methyltransferase	COMT	Cytoplasm	enzyme	1	0	206.311	60	11	249	11	1	265	29.5	5.83	4409	11	0	1.324	1.118	0.092699	0.078326	92.5	75.2	88.5	119.1	117.2	90.3	119.5	98.8	98.9	1.17189e+08	9.53754e+07	1.12e+08	1.50717e+08	1.48434e+08	1.14244e+08	1.51196e+08	1.2506e+08	1.25449e+08
Q8BIG7	Catechol O-methyltransferase domain-containing protein 1 OS=Mus musculus OX=10090 GN=Comtd1 PE=1 SV=1	catechol-O-methyltransferase domain containing 1	COMTD1	Plasma Membrane	enzyme	1	0	64.428	31	5	74	5	1	262	28.9	8.32	676	5	0	1.247	1.338	0.892407	0.421744	85.2	69	126.7	114.4	106.2	69.8	114.9	99.9	114	7.21811e+06	5.84902e+06	1.07552e+07	9.69661e+06	8.99197e+06	5.91752e+06	9.73207e+06	8.56313e+06	9.65346e+06
Q8CIE6	Coatomer subunit alpha OS=Mus musculus OX=10090 GN=Copa PE=1 SV=2	coatomer protein complex subunit alpha	COPA	Cytoplasm	transporter	0	0	741.227	49	47	910	47	1	1224	138.3	7.65	12467	47	0	1.157	0.96	0.264136	0.446073	95.4	88.9	106.9	95.1	127.8	110.4	91.6	86.1	97.7	4.90338e+08	4.56966e+08	5.48999e+08	4.88636e+08	6.57987e+08	5.67404e+08	4.70946e+08	4.42474e+08	5.02101e+08
Q9JIF7	Coatomer subunit beta OS=Mus musculus OX=10090 GN=Copb1 PE=1 SV=1	coatomer protein complex subunit beta 1	COPB1	Cytoplasm	transporter	0	0	221.975	25	16	187	16	1	953	107	6	2039	16	0	1.1	0.855	0.421763	0.886213	113.7	75	102.1	114.7	97.7	112.3	110.1	87.1	87.3	8.24845e+07	5.44241e+07	7.40727e+07	8.36279e+07	7.25159e+07	8.17687e+07	8.03494e+07	6.31704e+07	6.34673e+07
O55029	Coatomer subunit beta' OS=Mus musculus OX=10090 GN=Copb2 PE=1 SV=2	coatomer protein complex subunit beta 2	COPB2	Cytoplasm	transporter	0	0	133.446	20	11	107	11	1	905	102.4	5.3	2040	11	0	1.227	1.015	0.011718	0.32139	95.8	93.8	79.1	116.4	115.2	110.5	102	91.9	95.3	5.10316e+07	5.00233e+07	4.21642e+07	6.19899e+07	6.1329e+07	5.88765e+07	5.43632e+07	4.89384e+07	5.0745e+07
O89079	Coatomer subunit epsilon OS=Mus musculus OX=10090 GN=Cope PE=1 SV=3	coatomer protein complex subunit epsilon	COPE	Cytoplasm	transporter	0	0.001	7.951	18	3	22	3	1	308	34.5	5.06	93	3	0	1.104	0.744	0.222874	0.326306	97.9	103.7	105.5	100.3	114.5	126.4	115	77.2	59.4	1.24778e+06	1.24724e+06	1.34843e+06	1.21328e+06	1.46461e+06	1.52209e+06	1.43651e+06	927194	1.13012e+06
Q9QZE5	Coatomer subunit gamma-1 OS=Mus musculus OX=10090 GN=Copg1 PE=1 SV=1	coatomer protein complex subunit gamma 1	COPG1	Cytoplasm	transporter	0	0	272.719	46	25	299	23	1	874	97.5	5.35	3937	25	2	1.155	0.98	0.095604	0.753904	101.6	87.2	94.1	108.7	127.3	102.5	95.4	92.2	90.9	1.05163e+08	9.03587e+07	9.73957e+07	1.12478e+08	1.32128e+08	1.06038e+08	9.87392e+07	9.54331e+07	9.40839e+07
Q9QXK3	Coatomer subunit gamma-2 OS=Mus musculus OX=10090 GN=Copg2 PE=1 SV=1	coatomer protein complex subunit gamma 2	COPG2	Cytoplasm	transporter	0	0	116.316	20	11	114	9	1	871	97.6	5.8	1722	11	0	1.565	1.585	0.362925	0.571912	114.7	71	64.8	111.2	175	70	116.8	112.6	63.8	1.63098e+07	1.03707e+07	9.10543e+06	1.58301e+07	2.45482e+07	9.89261e+06	1.64312e+07	1.58319e+07	9.16042e+06
P61202	COP9 signalosome complex subunit 2 OS=Mus musculus OX=10090 GN=Cops2 PE=1 SV=1	COP9 signalosome subunit 2	Cops2	Nucleus	transcription regulator	0	0	63.15	26	7	44	7	1	443	51.6	5.53	245	7	0	1.038	0.996	0.383078	0.709138	84.3	103	96.2	90.3	151.5	99.8	95.8	82.7	96.5	2.7e+07	3.29695e+07	3.13297e+07	2.89314e+07	4.8484e+07	3.19935e+07	3.07394e+07	2.65806e+07	3.08928e+07
O88543	COP9 signalosome complex subunit 3 OS=Mus musculus OX=10090 GN=Cops3 PE=1 SV=3	COP9 signalosome subunit 3	COPS3	Cytoplasm	other	0	0	29.822	15	3	12	3	1	423	47.8	6.65	115	3	0	1.265	1.151	0.256724	0.831566	82.9	80	102.5	93.8	188.5	104.9	118.6	33.3	95.5	2.84702e+06	2.74498e+06	3.54498e+06	3.22916e+06	6.46651e+06	3.60053e+06	4.08921e+06	1.7061e+06	3.28472e+06
O88544	COP9 signalosome complex subunit 4 OS=Mus musculus OX=10090 GN=Cops4 PE=1 SV=1	COP9 signalosome subunit 4	COPS4	Cytoplasm	peptidase	0	0	43.484	12	3	36	3	1	406	46.3	5.83	597	3	0	1.212	1.081	0.7337	0.869108	65.7	150.2	62	77.1	166	79.7	70.7	157.6	71.1	6.86194e+06	1.56871e+07	6.48674e+06	8.0482e+06	1.73299e+07	8.31999e+06	7.3775e+06	1.64675e+07	7.41824e+06
O35864	COP9 signalosome complex subunit 5 OS=Mus musculus OX=10090 GN=Cops5 PE=1 SV=3	COP9 signalosome subunit 5	COPS5	Nucleus	transcription regulator	0	0.01	3.936	3	1	1	1	1	334	37.5	6.54	17	1	0
O88545	COP9 signalosome complex subunit 6 OS=Mus musculus OX=10090 GN=Cops6 PE=1 SV=1	COP9 signalosome subunit 6	COPS6	Nucleus	other	0	0.016	3.334	4	1	1	1	1	324	35.9	5.73	0	1	0	0.902	1.059	0.934173	0.96056			130.7	98.8	118	164.4	144	105.7	138.4			1.79971e+06	1.35947e+06	1.62399e+06	2262931	1.98161e+06	1.45516e+06	1.90549e+06
Q9CZ04	COP9 signalosome complex subunit 7a OS=Mus musculus OX=10090 GN=Cops7a PE=1 SV=2	COP9 signalosome subunit 7A	COPS7A	Cytoplasm	other	0	0	27.87	19	4	40	4	1	275	30.2	7.87	798	4	0	1.078	0.918	0.220654	0.762612	105.1	101.1	72.4	108.9	122.9	100.1	104.9	91.7	92.8	9.85483e+06	9.42878e+06	6.76315e+06	1.01636e+07	1.15117e+07	9.35859e+06	9.78878e+06	8.56901e+06	8.65985e+06
P61924	Coatomer subunit zeta-1 OS=Mus musculus OX=10090 GN=Copz1 PE=1 SV=1	coatomer protein complex subunit zeta 1	COPZ1	Cytoplasm	transporter	0	0.001	7.109	8	1	10	1	1	177	20.2	4.81	54	1	0	1.035	1.043	0.759446	0.757518	120.3	89.8	73.9	147.5	69.9	92.9	134.8	93.7	77.2	7.81288e+06	5.79269e+06	4.77901e+06	9.5055e+06	4.5033e+06	6.08681e+06	8.68306e+06	6.06923e+06	4.97773e+06
Q3THF9	Coenzyme Q-binding protein COQ10 homolog B, mitochondrial OS=Mus musculus OX=10090 GN=Coq10b PE=1 SV=1	coenzyme Q10B	COQ10B	Cytoplasm	other	0	0.001	8.719	4	1	2	1	1	240	27.3	9.29	27	1	0	0.621	0.737	0.246273	0.321352	124	82.7	158.5	76.9	53.6	117.5	91.4	85.5	109.9	3.21529e+06	2.13978e+06	4.07501e+06	1.95901e+06	1.37156e+06	3.00638e+06	2.32325e+06	2.26404e+06	2.81187e+06
Q8BMS4	Ubiquinone biosynthesis O-methyltransferase, mitochondrial OS=Mus musculus OX=10090 GN=Coq3 PE=1 SV=1	coenzyme Q3, methyltransferase	COQ3	Cytoplasm	enzyme	0	0	37.111	16	4	18	4	1	370	40.9	7.96	222	4	0	1.47	1.064	0.112072	0.326561	45.2	86.6	90.9	93.1	179.9	127.3	104.9	80.1	92.1	5.97534e+06	1.16162e+07	1.20152e+07	1.23298e+07	2.40349e+07	1.67976e+07	1.38449e+07	1.06402e+07	1.22477e+07
Q8BGB8	Ubiquinone biosynthesis protein COQ4 homolog, mitochondrial OS=Mus musculus OX=10090 GN=Coq4 PE=1 SV=1	coenzyme Q4	COQ4	Cytoplasm	other	0	0	68.716	44	8	105	8	1	266	30.1	9.26	707	8	0	1.095	0.721	0.798918	0.363171	62.1	117.9	133.6	64.7	146.8	129.1	74.2	85	86.6	4.09615e+07	7.78329e+07	8.86703e+07	4.26654e+07	9.73406e+07	8.52472e+07	4.89451e+07	5.61562e+07	5.73276e+07
Q9CXI0	2-methoxy-6-polyprenyl-1,4-benzoquinol methylase, mitochondrial OS=Mus musculus OX=10090 GN=Coq5 PE=1 SV=2	coenzyme Q5, methyltransferase	COQ5	Cytoplasm	enzyme	0	0	47.132	13	3	25	3	1	327	37.3	7.49	493	3	0	1.028	0.88	0.526726	0.671777	75.8	91.3	106.8	64.4	209.7	93.8	100.5	80.3	77.3	6.55953e+06	8.63093e+06	9.26247e+06	6.03056e+06	1.83881e+07	8.31888e+06	8.7599e+06	7.85938e+06	6.72979e+06
Q8R1S0	Ubiquinone biosynthesis monooxygenase COQ6, mitochondrial OS=Mus musculus OX=10090 GN=Coq6 PE=1 SV=3	coenzyme Q6, monooxygenase	COQ6	Cytoplasm	enzyme	0	0	43.553	15	3	11	3	1	476	51.4	7.17	35	3	0	2.577	2.16	0.408189	0.593026	51.7	32.1	140.6	44.3	133.2	206	57.9	111.6	122.6	1.2109e+06	741369	3.23756e+06	1.02266e+06	3.11663e+06	4.74283e+06	1.34037e+06	2.57023e+06	2.85087e+06
P97478	5-demethoxyubiquinone hydroxylase, mitochondrial OS=Mus musculus OX=10090 GN=Coq7 PE=1 SV=3	coenzyme Q7, hydroxylase	COQ7	Cytoplasm	enzyme	0	0	85.238	42	5	70	5	1	217	24	7.17	821	5	0	1.536	0.982	0.218334	0.649505	43.6	85.7	78.9	77	265.3	121.2	82.3	68.5	77.5	5.72837e+06	1.15203e+07	1.05804e+07	1.01169e+07	3.54533e+07	1.60322e+07	1.08154e+07	9.22486e+06	1.04514e+07
Q60936	Atypical kinase COQ8A, mitochondrial OS=Mus musculus OX=10090 GN=Coq8a PE=1 SV=2	coenzyme Q8A	COQ8A	Cytoplasm	kinase	0	0	20.17	8	4	24	4	1	645	71.7	6.54	395	4	0	0.691	0.573	0.30442	0.258329	92.2	141.5	139.4	96.3	129.2	27.4	79.9	128.9	65.1	4.19419e+06	6.40882e+06	6.30545e+06	4.35905e+06	5.84411e+06	2.22954e+06	3.6132e+06	5.82871e+06	2.94362e+06
Q566J8	Atypical kinase COQ8B, mitochondrial OS=Mus musculus OX=10090 GN=Coq8b PE=1 SV=1	coenzyme Q8B	COQ8B	Cytoplasm	kinase	0	0.001	6.146	4	2	4	2	1	533	59.2	7.93	22	2	0	0.846	0.916	0.628381	0.878805	122.8	78.8	108.1	91.5	89.2	106.9	112.5	91.1	99.1	4.76313e+06	3.05852e+06	4.18912e+06	3.54441e+06	3.49267e+06	4.14211e+06	4.37084e+06	3.53158e+06	3.83925e+06
Q8K1Z0	Ubiquinone biosynthesis protein COQ9, mitochondrial OS=Mus musculus OX=10090 GN=Coq9 PE=1 SV=1	coenzyme Q9	COQ9	Cytoplasm	other	0	0	93.761	22	6	69	6	1	313	35.1	5.92	1741	6	0	1.2	1.057	0.461567	0.580728	80.7	129.1	83.7	98.7	150.9	100.5	88.5	107	60.9	5.56361e+07	8.89723e+07	5.79129e+07	6.78725e+07	1.03787e+08	6.91634e+07	6.08739e+07	7.35761e+07	4.19935e+07
O89053	Coronin-1A OS=Mus musculus OX=10090 GN=Coro1a PE=1 SV=5	coronin 1A	CORO1A	Cytoplasm	other	0	0	50.941	21	6	27	6	1	461	51	6.48	194	6	0	1.266	1.488	0.742416	0.813123	61	150.7	66.2	74.2	162.4	83.9	82.1	120.8	98.6	1.13772e+07	2.75884e+07	1.22145e+07	1.35892e+07	2.97513e+07	1.53982e+07	1.51114e+07	2.21168e+07	1.80663e+07
Q9WUM3	Coronin-1B OS=Mus musculus OX=10090 GN=Coro1b PE=1 SV=1	coronin 1B	CORO1B	Cytoplasm	other	0	0	116.25	33	11	207	11	1	484	53.9	5.78	1716	11	0	1.236	1.199	0.300181	0.470092	81.9	113	83.1	102.8	111.4	101.7	93.3	99.7	113	6.36561e+07	8.78878e+07	6.50707e+07	7.99898e+07	8.67241e+07	7.93736e+07	7.28103e+07	7.74918e+07	8.79259e+07
Q9WUM4	Coronin-1C OS=Mus musculus OX=10090 GN=Coro1c PE=1 SV=2	coronin 1C	CORO1C	Cytoplasm	other	0	0	167.375	45	16	241	16	1	474	53.1	7.08	3741	16	0	1.288	1.043	0.523294	0.898556	67.7	122.9	96.3	80.2	129.3	124.1	75.8	100.5	103.2	7.14226e+07	1.29564e+08	1.01534e+08	8.44865e+07	1.36262e+08	1.30824e+08	7.98912e+07	1.05916e+08	1.08802e+08
Q8BH44	Coronin-2B OS=Mus musculus OX=10090 GN=Coro2b PE=1 SV=2	coronin 2B	CORO2B	Plasma Membrane	other	0	0	10.316	4	2	13	2	1	480	54.9	8.27	55	2	0	1.457	1.016	0.293763	0.537504	61.9	91.5	102.8	71.5	145.2	133.3	92.9	76.5	124.4	1.38961e+06	2.06408e+06	2.30223e+06	1.60258e+06	3.30194e+06	2.99412e+06	2.10634e+06	1.7414e+06	2.78834e+06
Q9D2V7	Coronin-7 OS=Mus musculus OX=10090 GN=Coro7 PE=1 SV=2	coronin 7	CORO7/CORO7-PAM16	Cytoplasm	other	0	0	96.799	18	9	66	9	1	922	100.7	5.77	884	9	0	1.744	1.542	0.134507	0.198231	67.2	108.6	67.8	93.3	131.2	118.2	104.5	93.3	116	1.56344e+07	2.52354e+07	1.58075e+07	2.2295e+07	3.04801e+07	2.74606e+07	2.44742e+07	2.17339e+07	2.69298e+07
Q9CQI6	Coactosin-like protein OS=Mus musculus OX=10090 GN=Cotl1 PE=1 SV=3	coactosin like F-actin binding protein 1	COTL1	Cytoplasm	other	0	0	63.96	44	5	54	5	1	142	15.9	5.4	514	5	0	1.268	1.056	0.958573	0.574296	77.7	73.1	168.8	98.5	42.4	187.4	82.1	50.8	119.1	1.40986e+07	1.32638e+07	3.06155e+07	1.78854e+07	7.69742e+06	3.39824e+07	1.48846e+07	9.26973e+06	2.15969e+07
Q8BH51	Cytochrome c oxidase assembly protein COX14 OS=Mus musculus OX=10090 GN=Cox14 PE=3 SV=1	cytochrome c oxidase assembly factor COX14	COX14	Cytoplasm	other	1	0.091	1.715	14	1	1	1	1	57	6.4	9.79	0	1	0
Q8BJ03	Cytochrome c oxidase assembly protein COX15 homolog OS=Mus musculus OX=10090 GN=Cox15 PE=1 SV=1	cytochrome c oxidase assembly homolog COX15	COX15	Cytoplasm	enzyme	7	0	15.265	8	2	12	2	1	413	45.8	9.79	51	2	0	0.47	1.055	0.851857	0.403883	196.3	74.3	87.2	41	234.2	37.4	28.6	92	109.1	4.1212e+06	3.36881e+06	1.81799e+06	846561	4.82253e+06	776958	597921	2.89251e+06	2.55753e+06
Q9D7J4	Cytochrome c oxidase assembly protein COX20, mitochondrial OS=Mus musculus OX=10090 GN=Cox20 PE=1 SV=1	cytochrome c oxidase assembly factor COX20	COX20	Cytoplasm	other	0	0	17.652	20	1	21	1	1	117	13.2	9.01	214	1	0	0.678	0.879	0.755871	0.735781	114.1	32.4	152.2	118	77.4	64.5	93	100.3	148.1	2.34516e+06	667250	3.12936e+06	2.44428e+06	1.58603e+06	1.3163e+06	1.89976e+06	2.04707e+06	3.03832e+06
P19783	Cytochrome c oxidase subunit 4 isoform 1, mitochondrial OS=Mus musculus OX=10090 GN=Cox4i1 PE=1 SV=2	cytochrome c oxidase subunit 4I1	COX4I1	Cytoplasm	enzyme	1	0	147.423	52	13	723	13	1	169	19.5	9.23	7241	13	0	0.747	1.048	0.394266	0.941843	87.9	98.2	132.7	118.3	66.8	73.3	90.9	103	129	7.68468e+08	8.58629e+08	1.16822e+09	1.03346e+09	5.83088e+08	6.41819e+08	7.94102e+08	9.0095e+08	1.12684e+09
P12787	Cytochrome c oxidase subunit 5A, mitochondrial OS=Mus musculus OX=10090 GN=Cox5a PE=1 SV=2	cytochrome c oxidase subunit 5A	COX5A	Cytoplasm	enzyme	0	0	346.626	63	11	880	11	1	146	16.1	6.54	12050	11	0	0.879	1.112	0.414825	0.835646	83.3	97.8	130.4	105.5	85.9	75	93.7	108.8	119.5	9.5811e+08	1.12255e+09	1.49738e+09	1.21199e+09	9.86547e+08	8.61414e+08	1.07615e+09	1.24865e+09	1.37201e+09
P19536	Cytochrome c oxidase subunit 5B, mitochondrial OS=Mus musculus OX=10090 GN=Cox5b PE=1 SV=1	cytochrome c oxidase subunit 5B	Cox5b	Cytoplasm	other	0	0	108.254	55	9	247	9	1	128	13.8	8.38	1942	9	0	1.625	1.245	0.993076	0.808901	61.7	66.6	161.2	115.7	64.5	108.3	78.2	82.9	161	1.02037e+08	1.10187e+08	2.66499e+08	1.92472e+08	1.06731e+08	1.79219e+08	1.30653e+08	1.37455e+08	2.66204e+08
P43024	Cytochrome c oxidase subunit 6A1, mitochondrial OS=Mus musculus OX=10090 GN=Cox6a1 PE=1 SV=2	cytochrome c oxidase subunit 6A1	COX6A1	Cytoplasm	enzyme	1	0	116.258	61	4	129	4	1	111	12.3	9.98	445	4	0	0.855	0.866	0.36808	0.347058	91.4	122	121.2	112.5	103.6	62.8	73.3	105	108.3	1.08085e+08	1.4441e+08	1.42447e+08	1.32931e+08	1.21751e+08	7.37368e+07	8.73962e+07	1.2331e+08	1.27151e+08
P56391	Cytochrome c oxidase subunit 6B1 OS=Mus musculus OX=10090 GN=Cox6b1 PE=1 SV=2	cytochrome c oxidase subunit 6B1	COX6B1	Cytoplasm	enzyme	0	0	122.974	76	9	518	9	1	86	10.1	8.72	9412	9	0	0.713	0.956	0.165239	0.536271	91.9	108.2	136.4	103.1	77.1	76.6	89.8	103.4	113.5	6.51752e+08	7.6606e+08	9.66249e+08	7.30296e+08	5.46262e+08	5.42807e+08	6.38884e+08	7.32109e+08	8.04084e+08
Q9CPQ1	Cytochrome c oxidase subunit 6C OS=Mus musculus OX=10090 GN=Cox6c PE=1 SV=3	cytochrome c oxidase subunit 6C	Cox6c	Cytoplasm	enzyme	1	0	82.924	64	8	242	8	1	76	8.5	10.14	2561	8	0	0.715	0.902	0.273594	0.682588	87.6	109	137.6	112.8	67.9	77.9	79.7	98.3	129.2	2.29155e+08	2.8492e+08	3.58471e+08	2.95967e+08	1.76782e+08	2.02891e+08	2.08385e+08	2.56052e+08	3.36746e+08
P48771	Cytochrome c oxidase subunit 7A2, mitochondrial OS=Mus musculus OX=10090 GN=Cox7a2 PE=1 SV=2	cytochrome c oxidase subunit 7A2	COX7A2	Cytoplasm	enzyme	1	0	70.058	30	4	153	4	1	83	9.3	10.27	3386	4	0	0.915	0.99	0.324322	0.884972	88.3	91.9	155.6	108.8	48.7	84.1	87.4	91	144.2	2.25664e+08	2.34888e+08	3.97792e+08	2.78576e+08	1.24541e+08	2.15042e+08	2.23498e+08	2.3243e+08	3.68923e+08
P17665	Cytochrome c oxidase subunit 7C, mitochondrial OS=Mus musculus OX=10090 GN=Cox7c PE=1 SV=1	cytochrome c oxidase subunit 7C	Cox7c	Cytoplasm	other	1	0	15.781	32	3	28	3	1	63	7.3	11	230	3	0	0.969	0.889	0.69885	0.792765	100.8	33.2	171	110.1	40.9	97.7	89.6	84.4	172.2	2.03234e+07	6.68852e+06	3.44835e+07	2.22256e+07	8.27555e+06	1.97086e+07	1.80741e+07	1.70195e+07	3.47278e+07
Q61147	Ceruloplasmin OS=Mus musculus OX=10090 GN=Cp PE=1 SV=2	ceruloplasmin	CP	Extracellular Space	enzyme	0	0	587.922	54	37	864	37	1	1061	121.1	5.85	13208	37	0	1.093	1.082	0.256619	0.307706	89.9	77.6	98.3	130.3	98.2	90.9	129.5	87.9	97.3	3.84972e+08	3.32377e+08	4.21104e+08	5.58044e+08	4.20718e+08	3.89412e+08	5.54769e+08	3.76471e+08	4.16919e+08
O89001	Carboxypeptidase D OS=Mus musculus OX=10090 GN=Cpd PE=1 SV=2	carboxypeptidase D	CPD	Extracellular Space	peptidase	1	0	106.939	12	13	148	13	1	1377	152.3	6.18	2218	13	0	0.767	0.947	0.258382	0.246871	104	126.6	112.2	86.1	121.3	71.2	108.2	106.2	64.2	5.40809e+07	6.58723e+07	5.83326e+07	4.48561e+07	6.30696e+07	3.71e+07	5.6264e+07	5.52442e+07	3.33769e+07
Q7TN98	Cytoplasmic polyadenylation element-binding protein 4 OS=Mus musculus OX=10090 GN=Cpeb4 PE=1 SV=1	cytoplasmic polyadenylation element binding protein 4	CPEB4	Plasma Membrane	other	0	0.013	3.589	2	1	9	1	1	729	80.1	7.18	19	1	0	1.296	1.197	0.190364	0.776471	73.8	81.1	112.8	105.1	144.4	103.2	97.1	100.2	82.4	1.15014e+06	1.28661e+06	1.75806e+06	1.63867e+06	2.25159e+06	1.61736e+06	1.5173e+06	1.56318e+06	1.28406e+06
Q80V42	Carboxypeptidase M OS=Mus musculus OX=10090 GN=Cpm PE=1 SV=2	carboxypeptidase M	CPM	Plasma Membrane	peptidase	0	0	437.428	44	22	855	22	1	443	50.5	7.78	12894	22	0	0.994	1.013	0.441996	0.524703	97.1	83.3	101.7	125.2	90.9	96.6	119.6	87.1	98.4	5.51781e+08	4.72714e+08	5.77838e+08	7.10933e+08	5.15796e+08	5.49183e+08	6.79641e+08	4.94161e+08	5.58885e+08
Q8C166	Copine-1 OS=Mus musculus OX=10090 GN=Cpne1 PE=1 SV=1	copine 1	CPNE1	Nucleus	transporter	0	0	255.367	41	18	405	17	1	536	58.8	5.66	4894	18	0	1.771	1.603	0.054427	0.018586	69.2	79.6	65	122.6	149.7	88.6	110.9	92.3	122	1.70942e+08	1.96744e+08	1.60495e+08	3.02847e+08	3.69976e+08	2.18732e+08	2.7397e+08	2.27984e+08	3.01415e+08
P59108	Copine-2 OS=Mus musculus OX=10090 GN=Cpne2 PE=1 SV=1	copine 2	CPNE2	Cytoplasm	other	0	0	59.685	18	6	112	5	1	548	61	5.96	1572	6	0	1.332	1.59	0.034471	0.117746	75.5	70.5	81	100.6	124	93.7	120.1	80.6	153.9	1.46362e+07	1.36722e+07	1.56959e+07	1.96483e+07	2.40137e+07	1.8146e+07	2.33246e+07	1.57421e+07	2.98527e+07
Q8BT60	Copine-3 OS=Mus musculus OX=10090 GN=Cpne3 PE=1 SV=2	copine 3	CPNE3	Cytoplasm	kinase	0	0	318.256	44	24	733	22	1	533	59.5	5.78	11066	24	2	1.09	1.242	0.043705	0.054768	90.5	95.4	88.7	104.2	98.7	97.2	112.4	96.7	116.1	4.94808e+08	5.21903e+08	4.84061e+08	5.68905e+08	5.3928e+08	5.30601e+08	6.15167e+08	5.28262e+08	6.34283e+08
Q9DC53	Copine-8 OS=Mus musculus OX=10090 GN=Cpne8 PE=2 SV=3	copine 8	CPNE8	Cytoplasm	other	0	0	12.154	5	2	58	1	1	577	64.6	5.97	895	2	0	0.751	0.641	0.828617	0.772274	101.9		108.7	79.1	46.9	159.3	58.4	67.4	278.2	116497		124033	91720.4	53507.5	181779	66738.8	76939.3	317496
P36552	Oxygen-dependent coproporphyrinogen-III oxidase, mitochondrial OS=Mus musculus OX=10090 GN=Cpox PE=1 SV=2	coproporphyrinogen oxidase	CPOX	Cytoplasm	enzyme	0	0	99.208	27	9	77	9	1	443	49.7	8.53	1351	9	0	0.781	0.893	0.062898	0.133167	107.2	110.1	137.3	86	65.9	98.8	98.3	90.3	106.1	1.27433e+08	1.30997e+08	1.63478e+08	1.02167e+08	7.84073e+07	1.17852e+08	1.17076e+08	1.07566e+08	1.26097e+08
Q8BFS6	Serine/threonine-protein phosphatase CPPED1 OS=Mus musculus OX=10090 GN=Cpped1 PE=1 SV=1	calcineurin like phosphoesterase domain containing 1	CPPED1	Cytoplasm	enzyme	0	0	10.377	6	1	8	1	1	312	35.2	5.34	97	1	0	1.871	1.698	0.314253	0.443943	139.7	29.6	59.4	125.7	107	111.1	148.3	100.9	78.3	1.32353e+06	280169	610061	1.254e+06	1.05859e+06	1.13441e+06	1.44674e+06	955223	770581
Q9WVJ3	Carboxypeptidase Q OS=Mus musculus OX=10090 GN=Cpq PE=1 SV=1	carboxypeptidase Q	CPQ	Extracellular Space	peptidase	0	0	39.305	8	2	24	2	1	470	51.8	6.21	456	2	0	1.111	1.033	0.222078	0.474578	104.4	36.7	99.4	97.5	110.5	145.5	131.1	72.1	102.7	2.38968e+06	830920	2.25815e+06	2.2636e+06	2.51339e+06	3.34514e+06	2.97173e+06	1.63962e+06	2.3596e+06
Q6NVF9	Cleavage and polyadenylation specificity factor subunit 6 OS=Mus musculus OX=10090 GN=Cpsf6 PE=1 SV=1	cleavage and polyadenylation specific factor 6	CPSF6	Nucleus	other	0	0.024	2.797	5	1	10	1	1	551	59.1	7.15	48	1	0	1.008	0.952	0.68569	0.588642	155.5	109.6	70.4	110.4	132.7	45.5	124.7	104.3	46.8	196747	136635	88195.5	138128	165263	57335.6	158386	129912	58592.4
P97742	Carnitine O-palmitoyltransferase 1, liver isoform OS=Mus musculus OX=10090 GN=Cpt1a PE=1 SV=4	carnitine palmitoyltransferase 1A	CPT1A	Cytoplasm	enzyme	2	0	295.286	40	24	385	24	1	773	88.2	8.62	5763	24	0	1.099	1.352	0.7973	0.587628	85.1	70	137.3	94.8	87.2	93.5	115	92.6	124.5	2.05672e+08	1.69221e+08	3.32081e+08	2.29399e+08	2.11126e+08	2.26135e+08	2.78107e+08	2.24253e+08	3.00934e+08
Q924X2	Carnitine O-palmitoyltransferase 1, muscle isoform OS=Mus musculus OX=10090 GN=Cpt1b PE=1 SV=1	carnitine palmitoyltransferase 1B	CPT1B	Cytoplasm	enzyme	0	0	33.624	6	4	38	4	1	772	88.2	8.38	942	4	0	1.364	1.827	0.162621	0.165927	71.4	55.6	97.5	139.2	97.4	89.1	130.5	74.5	144.7	5.26882e+06	4.13706e+06	7.20615e+06	1.03268e+07	7.24652e+06	6.58953e+06	9.68812e+06	5.56309e+06	1.06703e+07
P52825	Carnitine O-palmitoyltransferase 2, mitochondrial OS=Mus musculus OX=10090 GN=Cpt2 PE=1 SV=2	carnitine palmitoyltransferase 2	CPT2	Cytoplasm	enzyme	0	0	539.771	55	31	971	31	1	658	73.9	8.37	12979	31	0	0.73	0.823	0.030406	0.105311	115.9	111.9	137	97.1	84.6	66.3	95.4	112.6	79.1	6.97098e+08	6.72596e+08	8.23323e+08	5.84009e+08	5.08378e+08	3.98805e+08	5.73646e+08	6.7697e+08	4.7602e+08
Q64735	Complement component receptor 1-like protein OS=Mus musculus OX=10090 GN=Cr1l PE=1 SV=1	complement C3b/C4b receptor 1 like	CR1L	Plasma Membrane	other	1	0	195.846	29	11	249	11	1	483	53.7	6.65	3064	11	0	1.431	1.185	0.116054	0.276461	99.8	85.6	80.2	123	122.6	91.6	108	87.7	101.5	1.86422e+08	1.6083e+08	1.50126e+08	2.30667e+08	2.29077e+08	1.71998e+08	2.01919e+08	1.65843e+08	1.8983e+08
P47934	Carnitine O-acetyltransferase OS=Mus musculus OX=10090 GN=Crat PE=1 SV=3	carnitine O-acetyltransferase	CRAT	Cytoplasm	enzyme	0	0	120.814	31	13	138	13	1	626	70.8	8.44	2273	13	0	1.092	1.073	0.803084	0.93577	113.1	92.4	89.4	124.6	81	101	121	78.4	99.2	7.15136e+07	5.85323e+07	5.65703e+07	7.89773e+07	5.11688e+07	6.38607e+07	7.656e+07	4.96509e+07	6.26915e+07
Q80YA8	Protein crumbs homolog 2 OS=Mus musculus OX=10090 GN=Crb2 PE=1 SV=3	crumbs cell polarity complex component 2	CRB2	Extracellular Space	other	2	0	24.311	2	2	3	2	1	1282	134.7	5.22	66	2	0	1.381	1.372	0.450231	0.490847	32.2	117.3	88.2	49	181.7	121.8	64.2	121	124.6	675477	2.46188e+06	1.85112e+06	1.02904e+06	3.81591e+06	2.55934e+06	1.35002e+06	2.54553e+06	2.62639e+06
Q8QZT4	Protein crumbs homolog 3 OS=Mus musculus OX=10090 GN=Crb3 PE=3 SV=1	crumbs family member 3	Crb3	Plasma Membrane	other	2	0	11.037	27	2	8	2	1	113	11.9	6.68	66	2	0	1.035	0.957	0.73475	0.822039	99.9	171.4	55.4	103.4	131.4	46	95.6	155.9	41.1	7.1139e+06	1.21944e+07	3.9669e+06	7.35987e+06	9.3927e+06	3.31712e+06	6.82788e+06	1.12579e+07	2.94775e+06
Q8C7D2	Protein cereblon OS=Mus musculus OX=10090 GN=Crbn PE=1 SV=1	cereblon	CRBN	Cytoplasm	enzyme	0	0.013	3.544	9	1	6	1	1	445	50.8	5.33	0	1	0	1.372	0.673	0.535515	0.912411	93.4	110	52.9	128.1	219.3	26.9	155.2	62.8	51.3	111443	130324	63904.7	152097	258160	31520.4	182144	80870.7	67639.6
Q91XD7	Cysteine-rich with EGF-like domain protein 1 OS=Mus musculus OX=10090 GN=Creld1 PE=1 SV=1	cysteine rich with EGF like domains 1	CRELD1	membrane	other	2	0	22.494	7	2	25	2	1	420	45.7	5.02	212	2	0	0.44	0.872	0.262017	0.743039	104.7	169	95.8	136	46.1	29.7	41.8	185.7	91.3	6.24561e+06	1.03618e+07	5.80543e+06	8.10249e+06	5.73242e+06	2.81538e+06	3.3695e+06	1.14138e+07	5.43476e+06
P63254	Cysteine-rich protein 1 OS=Mus musculus OX=10090 GN=Crip1 PE=1 SV=2	cysteine rich protein 1	CRIP1	Cytoplasm	other	0	0.001	8.429	31	2	5	2	1	77	8.5	8.57	52	2	0	0.845	0.727	0.96639	0.424327	104.2	84.7	128.7	139.7	86.9	88.1	116.6	75.4	75.8	5.08946e+06	4.12191e+06	6.27006e+06	6.8576e+06	4.2422e+06	4.2877e+06	5.73687e+06	3.67069e+06	3.75094e+06
Q9DCT8	Cysteine-rich protein 2 OS=Mus musculus OX=10090 GN=Crip2 PE=1 SV=1	cysteine rich protein 2	Crip2	Plasma Membrane	other	0	0	110.04	67	7	111	7	1	208	22.7	8.63	1168	7	0	1.063	0.968	0.971429	0.359537	141.3	83.3	94.7	91.9	100.7	129.1	96.6	91.7	70.7	6.33529e+07	3.71922e+07	4.23025e+07	4.10577e+07	4.51976e+07	5.76262e+07	4.31467e+07	4.09309e+07	3.1702e+07
Q03401	Cysteine-rich secretory protein 1 OS=Mus musculus OX=10090 GN=Crisp1 PE=2 SV=1	cysteine-rich secretory protein 1	Crisp1/Crisp3	Extracellular Space	other	0	0	23.451	11	2	3	2	1	244	27.7	6.87	113	2	0	0.017	present in sham only					885.2		14.8							1.86855e+07		312674
Q64010	Adapter molecule crk OS=Mus musculus OX=10090 GN=Crk PE=1 SV=1	CRK proto-oncogene, adaptor protein	CRK	Cytoplasm	other	0	0	14.96	8	2	13	2	1	304	33.8	5.55	132	2	0	1.075	1.117	0.7083	0.367546	104.3	18.8	118.3	112.1	30.4	157.3	116.5	81.8	160.4	2.16307e+06	642346	2.47273e+06	2.35587e+06	881728	3.25324e+06	2.45399e+06	1.68837e+06	3.31466e+06
P47941	Crk-like protein OS=Mus musculus OX=10090 GN=Crkl PE=1 SV=2	CRK like proto-oncogene, adaptor protein	CRKL	Cytoplasm	kinase	0	0.064	1.979	4	1	2	1	1	303	33.8	6.74	13	1	0
P97427	Dihydropyrimidinase-related protein 1 OS=Mus musculus OX=10090 GN=Crmp1 PE=1 SV=1	collapsin response mediator protein 1	CRMP1	Cytoplasm	enzyme	0	0.001	8.392	3	2	20	1	1	572	62.1	7.12	151	2	0	1.138	1.088	0.21333	0.424545	100.6	85.8	87.5	99.6	133.7	97	111.6	88.9	95.3	4.2778e+06	3.66248e+06	3.74482e+06	4.23311e+06	5.69341e+06	4.12399e+06	4.75824e+06	3.81762e+06	4.04919e+06
Q8CJ40	Rootletin OS=Mus musculus OX=10090 GN=Crocc PE=1 SV=2	ciliary rootlet coiled-coil, rootletin	CROCC	Plasma Membrane	other	0	0.001	7.888	1	2	192	1	1	2009	226.8	5.55	4890	2	0
Q9DC50	Peroxisomal carnitine O-octanoyltransferase OS=Mus musculus OX=10090 GN=Crot PE=1 SV=1	carnitine O-octanoyltransferase	CROT	Cytoplasm	enzyme	0	0	469.568	58	29	401	29	1	612	70.2	6.73	5541	29	0	1.58	1.824	0.425915	0.227453	67.9	51.6	112.6	115.6	70.2	107.3	123.9	77	173.9	9.69923e+07	7.36204e+07	1.60856e+08	1.64923e+08	1.00275e+08	1.53275e+08	1.76761e+08	1.10129e+08	2.48264e+08
P23927	Alpha-crystallin B chain OS=Mus musculus OX=10090 GN=Cryab PE=1 SV=2	crystallin alpha B	CRYAB	Nucleus	other	0	0	38.41	18	3	99	3	1	175	20.1	7.33	1113	3	0	1.803	1.939	0.036957	0.076316	56.4	94.6	59.4	105.7	112.5	107.1	115.2	94.2	154.7	1.16157e+07	1.95247e+07	1.22493e+07	2.18517e+07	2.3227e+07	2.20883e+07	2.38372e+07	1.96779e+07	3.19262e+07
Q99KP3	Lambda-crystallin homolog OS=Mus musculus OX=10090 GN=Cryl1 PE=1 SV=3	crystallin lambda 1	CRYL1	Cytoplasm	enzyme	0	0	309.571	67	17	447	17	1	319	35.2	5.86	6661	17	0	1.447	1.216	0.038983	0.233357	92.6	81.2	76.2	117.5	100.6	137	114.6	81.6	98.8	1.89544e+08	1.65999e+08	1.55963e+08	2.40248e+08	2.05676e+08	2.80129e+08	2.34342e+08	1.66787e+08	2.0224e+08
P47199	Quinone oxidoreductase OS=Mus musculus OX=10090 GN=Cryz PE=1 SV=1	crystallin zeta	CRYZ	Cytoplasm	enzyme	0	0	299.44	72	18	462	18	1	331	35.2	8.07	6086	18	0	1.938	1.349	0.044961	0.368525	103.6	64.2	67	132.1	105.3	129.8	131.4	76.3	90.4	3.57994e+08	2.21814e+08	2.31987e+08	4.56958e+08	3.63714e+08	4.48497e+08	4.54082e+08	2.63461e+08	3.12185e+08
Q921W4	Quinone oxidoreductase-like protein 1 OS=Mus musculus OX=10090 GN=Cryzl1 PE=1 SV=1	crystallin zeta like 1	CRYZL1	Cytoplasm	enzyme	0	0	51.307	28	5	24	5	1	348	38.7	5.97	293	5	0	1.231	0.933	0.037566	0.78467	94.6	99.7	74.9	109.4	126.5	116.4	107.4	88.2	82.9	4.65314e+06	4.89254e+06	3.68554e+06	5.35769e+06	6.19349e+06	5.70413e+06	5.25855e+06	4.3333e+06	4.10495e+06
Q3UNZ8	Quinone oxidoreductase-like protein 2 OS=Mus musculus OX=10090 GN=Cryzl2 PE=1 SV=1	crystallin zeta like 2	Cryzl2	Cytoplasm	enzyme	0	0	300.376	66	12	518	12	1	350	37.8	8.9	10482	12	0	0.997	1.266	0.476019	0.854939	135.9	81.5	94.6	105.8	62.6	94.4	128.3	119.7	77.3	3.62124e+08	2.1685e+08	2.51756e+08	2.82329e+08	1.66503e+08	2.5116e+08	3.41966e+08	3.19159e+08	2.05864e+08
Q9CZU6	Citrate synthase, mitochondrial OS=Mus musculus OX=10090 GN=Cs PE=1 SV=1	citrate synthase	CS	Cytoplasm	enzyme	0	0	428.723	54	20	759	20	1	464	51.7	8.57	11543	20	0	1.09	1.103	0.933491	0.943217	135.8	81	86.5	123.8	79.4	94.3	109	95.5	94.7	7.31477e+08	4.36413e+08	4.66796e+08	6.66855e+08	4.27534e+08	5.07978e+08	5.87777e+08	5.14414e+08	5.10612e+08
Q9DBE0	Cysteine sulfinic acid decarboxylase OS=Mus musculus OX=10090 GN=Csad PE=1 SV=1	cysteine sulfinic acid decarboxylase	CSAD	Cytoplasm	enzyme	0	0	247.867	48	16	311	16	1	493	55.1	6.61	5008	16	0	2.227	2.283	0.038356	0.210496	52.6	51	91.1	117.1	113.1	169.9	120.1	59.9	125.3	8.00717e+07	7.76408e+07	1.38756e+08	1.78304e+08	1.72171e+08	2.58761e+08	1.82808e+08	9.2158e+07	1.90703e+08
Q91W50	Cold shock domain-containing protein E1 OS=Mus musculus OX=10090 GN=Csde1 PE=1 SV=1	cold shock domain containing E1	CSDE1	Cytoplasm	enzyme	0	0	34.211	8	6	49	6	1	798	88.7	6.37	695	6	0	1.336	1.048	0.050398	0.592017	81.3	85.4	102.4	104.8	114.1	128.3	89	89.5	105.2	8.77821e+06	9.20039e+06	1.10339e+07	1.12913e+07	1.23391e+07	1.38183e+07	9.77042e+06	9.64684e+06	1.13317e+07
Q9ERK4	Exportin-2 OS=Mus musculus OX=10090 GN=Cse1l PE=1 SV=1	chromosome segregation 1 like	CSE1L	Nucleus	transporter	0	0	59.357	9	6	114	6	1	971	110.4	5.77	451	6	0	1.148	0.889	0.321112	0.406767	113.5	80.4	99.3	114	133.5	95.3	95.3	88.3	80.4	2.48809e+07	1.7635e+07	2.17494e+07	2.50545e+07	2.92322e+07	2.08645e+07	2.09093e+07	1.96535e+07	1.76049e+07
P41241	Tyrosine-protein kinase CSK OS=Mus musculus OX=10090 GN=Csk PE=1 SV=2	C-terminal Src kinase	CSK	Cytoplasm	kinase	0	0	13.271	9	3	23	3	1	450	50.7	7.06	113	3	0	0.853	1.199	0.711909	0.160797	77.1	98.3	96.7	74.4	141.9	82.4	92.5	120.9	115.9	5.7611e+06	7.33962e+06	7.24834e+06	5.57669e+06	1.06098e+07	6.16305e+06	6.92922e+06	9.15668e+06	8.65411e+06
Q8BK63	Casein kinase I isoform alpha OS=Mus musculus OX=10090 GN=Csnk1a1 PE=1 SV=2	casein kinase 1 alpha 1	CSNK1A1	Cytoplasm	kinase	0	0	36.079	20	6	47	6	1	337	38.9	9.57	490	6	0	0.999	1.143	0.836395	0.43889	103.7	63.5	107.7	110.1	73.1	103.7	118.6	75.3	144.4	2.04141e+07	1.25004e+07	2.12239e+07	2.16639e+07	1.4596e+07	2.05096e+07	2.33782e+07	1.50023e+07	2.84131e+07
Q8BTH8	Casein kinase I isoform gamma-1 OS=Mus musculus OX=10090 GN=Csnk1g1 PE=1 SV=2	casein kinase 1 gamma 1	CSNK1G1	Cytoplasm	kinase	0	0	80.308	24	9	111	3	1	459	52.7	9.01	1315	9	0	0.842	1.003	0.055913	0.538188	99.1	123.4	105.3	88.7	93.2	82	105.7	112	90.6	7.9756e+06	1.01362e+07	8.40235e+06	7.03598e+06	7.313e+06	6.72717e+06	8.31189e+06	8.86933e+06	7.21758e+06
Q8BVP5	Casein kinase I isoform gamma-2 OS=Mus musculus OX=10090 GN=Csnk1g2 PE=1 SV=1	casein kinase 1 gamma 2	CSNK1G2	Cytoplasm	kinase	0	0	74.521	26	9	108	1	1	415	47.6	9.06	1238	9	0	0.935	0.799	0.946149	0.988522	101	81.1	116.3	127.1	94.5	80.5	143.1	75.7	80.7	831168	666349	949150	1.03417e+06	788680	657284	1.1647e+06	617272	661618
Q8C4X2	Casein kinase I isoform gamma-3 OS=Mus musculus OX=10090 GN=Csnk1g3 PE=1 SV=2	casein kinase 1 gamma 3	CSNK1G3	Cytoplasm	kinase	0	0	142.579	36	12	172	4	1	424	48.9	9.11	2103	12	7	0.87	1.015	0.209051	0.974885	92.3	106	111	88.4	92.2	99.6	81.6	121.4	107.6	7.37992e+07	8.47631e+07	8.89941e+07	7.0965e+07	7.38007e+07	7.96272e+07	6.5212e+07	9.70979e+07	8.61965e+07
Q60737	Casein kinase II subunit alpha OS=Mus musculus OX=10090 GN=Csnk2a1 PE=1 SV=2	casein kinase 2 alpha 1	CSNK2A1	Nucleus	kinase	0	0	137.462	43	11	159	10	1	391	45.1	7.74	2323	11	1	1.157	0.974	0.149278	0.750415	103.3	94.6	87.8	109.5	125.4	98.7	97.8	92.2	90.6	9.77174e+07	8.95739e+07	8.30979e+07	1.03615e+08	1.1915e+08	9.35412e+07	9.24895e+07	8.71782e+07	8.58064e+07
O54833	Casein kinase II subunit alpha' OS=Mus musculus OX=10090 GN=Csnk2a2 PE=1 SV=1	casein kinase 2 alpha 2	CSNK2A2	Cytoplasm	kinase	0	0	28.904	10	3	9	2	1	350	41.2	8.56	161	3	0	2.725	2.424	0.196976	0.087193	52.5	63	30.5	143	234.9	37	150.9	61	127.3	1.91304e+06	3.11857e+06	2.50077e+06	4.63578e+06	7.65682e+06	2.74744e+06	4.83832e+06	2.88681e+06	4.08039e+06
P67871	Casein kinase II subunit beta OS=Mus musculus OX=10090 GN=Csnk2b PE=1 SV=1	casein kinase 2 beta	CSNK2B	Cytoplasm	kinase	0	0	62.548	46	6	67	6	1	215	24.9	5.55	890	6	0	1.238	1.08	0.00732	0.726929	93.6	88	90.2	111.8	126.5	111.7	97.4	82	98.7	1.90815e+07	1.80277e+07	1.86164e+07	2.28007e+07	2.59733e+07	2.30515e+07	1.98857e+07	1.67537e+07	2.01435e+07
Q8VHY0	Chondroitin sulfate proteoglycan 4 OS=Mus musculus OX=10090 GN=Cspg4 PE=1 SV=3	chondroitin sulfate proteoglycan 4	CSPG4	Plasma Membrane	other	1	0	36.405	4	5	29	5	1	2327	252.2	5.44	201	5	0	0.695	1.068	0.198624	0.356919	85.4	86	95.1	57.8	93.5	59.8	240.4	90	91.9	4.01958e+06	4.06809e+06	5.04315e+06	2.86004e+06	4.43685e+06	2.85919e+06	1.13165e+07	4.2484e+06	4.4597e+06
P97315	Cysteine and glycine-rich protein 1 OS=Mus musculus OX=10090 GN=Csrp1 PE=1 SV=3	cysteine and glycine rich protein 1	CSRP1	Nucleus	other	0	0	82.052	44	6	145	6	1	193	20.6	8.57	3254	6	0	0.784	0.941	0.440174	0.651593	136.8	109	80.7	112	80.5	85.4	119.7	102.5	73.5	1.29548e+08	1.03171e+08	7.6435e+07	1.05921e+08	7.649e+07	8.08196e+07	1.13299e+08	9.69738e+07	6.97266e+07
P97314	Cysteine and glycine-rich protein 2 OS=Mus musculus OX=10090 GN=Csrp2 PE=1 SV=3	cysteine and glycine rich protein 2	CSRP2	Nucleus	other	0	0	138.083	60	9	225	9	1	193	20.9	8.62	3668	9	0	0.836	0.774	0.389383	0.422026	119.5	126.9	86.5	108.2	82.9	99.9	92.5	121.5	62.2	1.22596e+08	1.30342e+08	8.88183e+07	1.10827e+08	8.4914e+07	1.02648e+08	9.48904e+07	1.24548e+08	6.41805e+07
P21460	Cystatin-C OS=Mus musculus OX=10090 GN=Cst3 PE=1 SV=2	cystatin C	CST3	Extracellular Space	other	0	0	81.551	43	6	71	6	1	140	15.5	9	828	6	0	1.02	1.107	0.477673	0.393615	96	103.4	81.3	126.1	98	87.6	112	89.3	106.4	5.53239e+07	5.97777e+07	4.69246e+07	7.26788e+07	5.72103e+07	5.04531e+07	6.48072e+07	5.18199e+07	6.16733e+07
Q62426	Cystatin-B OS=Mus musculus OX=10090 GN=Cstb PE=1 SV=1	cystatin B	CSTB	Cytoplasm	peptidase	0	0	37.315	45	3	43	3	1	98	11	7.39	404	3	0	1.511	1.298	0.124735	0.358398	97.2	55.1	82.5	124.6	86.7	137.7	144.5	64.6	107.1	2.51166e+07	1.42205e+07	2.12989e+07	3.218e+07	2.23981e+07	3.56184e+07	3.73325e+07	1.67168e+07	2.76541e+07
O88712	C-terminal-binding protein 1 OS=Mus musculus OX=10090 GN=Ctbp1 PE=1 SV=2	C-terminal binding protein 1	CTBP1	Nucleus	enzyme	0	0.001	6.615	12	3	6	3	1	441	47.7	6.77	35	3	0	0.939	0.961	0.840308	0.914559	116.7	73.6	117.2	109.6	63.3	120	123	64.5	112.1	779472	501970	783050	789411	422505	812575	825042	436359	748878
P58466	Carboxy-terminal domain RNA polymerase II polypeptide A small phosphatase 1 OS=Mus musculus OX=10090 GN=Ctdsp1 PE=1 SV=1	CTD small phosphatase 1	CTDSP1	Nucleus	phosphatase	0	0	68.154	23	5	80	4	1	261	29.2	6.13	1362	5	1	0.96	1.027	0.353169	0.973819	107.6	102.3	95.8	98.2	87.4	102.4	105.7	105.1	95.4	4.69693e+07	4.47022e+07	4.18014e+07	4.29547e+07	3.8121e+07	4.46978e+07	4.61116e+07	4.58591e+07	4.1664e+07
P58465	CTD small phosphatase-like protein OS=Mus musculus OX=10090 GN=Ctdspl PE=2 SV=3	CTD small phosphatase like	CTDSPL	Nucleus	other	0	0	20.094	8	2	31	1	1	276	31.1	5.69	1174	2	0	0.757	0.919	0.369902	0.765166	145.4	72.9	112.2	85	99.6	80	103.1	129.5	72.3	6.25552e+06	3.145e+06	4.87397e+06	3.66986e+06	4.28424e+06	3.47677e+06	4.45554e+06	5.57537e+06	3.14247e+06
Q8VCN5	Cystathionine gamma-lyase OS=Mus musculus OX=10090 GN=Cth PE=1 SV=1	cystathionine gamma-lyase	CTH	Cytoplasm	enzyme	0	0	281.845	63	16	347	16	1	398	43.5	7.65	5491	16	0	1.379	1.321	0.046066	0.33906	92.1	58.9	85.1	117.3	105.1	143.2	112.3	67.2	118.8	1.35316e+08	8.65359e+07	1.24962e+08	1.72231e+08	1.54514e+08	2.10314e+08	1.654e+08	9.87975e+07	1.74622e+08
P26231	Catenin alpha-1 OS=Mus musculus OX=10090 GN=Ctnna1 PE=1 SV=1	catenin alpha 1	CTNNA1	Plasma Membrane	other	0	0	868.965	68	45	1029	39	1	906	100	6.23	18534	45	6	1.269	1.144	0.049664	0.273891	101.6	72.9	88.1	112.7	108.3	111.7	114.7	89.3	100.7	4.94507e+08	3.54415e+08	4.29359e+08	5.48278e+08	5.26901e+08	5.43532e+08	5.57712e+08	4.35222e+08	4.8989e+08
Q61301	Catenin alpha-2 OS=Mus musculus OX=10090 GN=Ctnna2 PE=1 SV=3	catenin alpha 2	CTNNA2	Plasma Membrane	other	0	0	117.377	10	8	176	2	1	953	105.2	5.71	4680	8	0
O88327	Alpha-catulin OS=Mus musculus OX=10090 GN=Ctnnal1 PE=1 SV=1	catenin alpha like 1	CTNNAL1	Plasma Membrane	other	0	0	48.678	13	7	45	7	1	731	81.4	6.55	733	7	0	2.403	1.849	0.252301	0.163257	105	54.7	41	131.4	161.8	55.9	159.7	101.1	89.3	3.48844e+06	2.5644e+06	1.15394e+06	4.45685e+06	8.0138e+06	1.58565e+06	5.31892e+06	4.28163e+06	2.51543e+06
Q02248	Catenin beta-1 OS=Mus musculus OX=10090 GN=Ctnnb1 PE=1 SV=1	catenin beta 1	CTNNB1	Nucleus	transcription regulator	0	0	413.7	52	27	599	23	1	781	85.4	5.86	10093	27	4	1.265	1.186	0.106271	0.245083	105.2	76.3	84.5	106.9	113.9	102.6	116.5	93.9	100.2	3.95723e+08	2.87215e+08	3.18139e+08	4.02561e+08	4.28776e+08	3.8603e+08	4.38639e+08	3.53635e+08	3.77147e+08
P30999	Catenin delta-1 OS=Mus musculus OX=10090 GN=Ctnnd1 PE=1 SV=2	catenin delta 1	CTNND1	Nucleus	other	0	0	613.248	48	38	904	38	1	938	104.9	6.87	16361	38	0	1.306	1.22	0.072881	0.216986	97.4	71.3	80.8	129.8	105.5	100.3	129.6	86.7	98.6	4.73756e+08	3.45883e+08	3.91736e+08	6.29544e+08	5.11667e+08	4.86574e+08	6.28549e+08	4.20844e+08	4.78281e+08
P70698	CTP synthase 1 OS=Mus musculus OX=10090 GN=Ctps1 PE=1 SV=2	CTP synthase 1	CTPS1	Nucleus	enzyme	0	0	36.115	9	4	11	4	1	591	66.6	6.58	274	4	0	1.984	1.544	0.037977	0.116299	42.9	94.3	62.9	156.9	108.1	124.7	89	124.1	97	5.5409e+06	1.21881e+07	8.14636e+06	2.06546e+07	1.40168e+07	1.62499e+07	1.1796e+07	1.60289e+07	1.27235e+07
P70303	CTP synthase 2 OS=Mus musculus OX=10090 GN=Ctps2 PE=1 SV=1	CTP synthase 2	CTPS2	Cytoplasm	enzyme	0	0	10.282	2	1	3	1	1	586	65.5	6.49	116	1	0	1.386	1.39	0.494128	0.696443	97.7	40.3	115.3	135.4	56.8	140.8	157	20.8	135.9	2.07096e+06	858326	2.44379e+06	2.87013e+06	1.20636e+06	2.99324e+06	3.33146e+06	442803	2.87982e+06
P16675	Lysosomal protective protein OS=Mus musculus OX=10090 GN=Ctsa PE=1 SV=1	cathepsin A	CTSA	Cytoplasm	peptidase	0	0	85.969	22	8	95	8	1	474	53.8	5.86	1550	8	0	1.181	1.029	0.38373	0.849576	111.6	93.1	82	118.7	92.2	109.9	105.3	95.8	91.4	5.77178e+07	4.81406e+07	4.24047e+07	6.1363e+07	4.77231e+07	5.68351e+07	5.44372e+07	4.95314e+07	4.73071e+07
P10605	Cathepsin B OS=Mus musculus OX=10090 GN=Ctsb PE=1 SV=2	cathepsin B	CTSB	Cytoplasm	peptidase	0	0	114.256	27	6	120	6	1	339	37.3	5.91	1619	6	0	1.099	0.914	0.559901	0.162925	97.1	93.5	111.5	106.7	90	129.7	95	88.8	87.9	2.85313e+07	2.80485e+07	3.27591e+07	3.14281e+07	2.6336e+07	3.80114e+07	2.7898e+07	2.59809e+07	2.59207e+07
P18242	Cathepsin D OS=Mus musculus OX=10090 GN=Ctsd PE=1 SV=1	cathepsin D	CTSD	Cytoplasm	peptidase	1	0	108.203	30	7	205	7	1	410	44.9	7.15	1672	7	0	1.252	1.325	0.074011	0.241032	83	76.5	96	98.2	103.9	124.7	127.7	80	109.9	5.60761e+07	5.15008e+07	6.46307e+07	6.62823e+07	7.00433e+07	8.38786e+07	8.61635e+07	5.39149e+07	7.39902e+07
P49935	Pro-cathepsin H OS=Mus musculus OX=10090 GN=Ctsh PE=1 SV=2	cathepsin H	CTSH	Cytoplasm	peptidase	0	0	46.098	15	3	24	3	1	333	37.1	8.4	796	3	0	1.504	1.059	0.515168	0.60266	87.8	66.6	107.2	132	48.1	155.7	140.7	68.8	93	9.90368e+06	7.2657e+06	1.16394e+07	1.41605e+07	9.04839e+06	1.72823e+07	1.50367e+07	7.88411e+06	1.02056e+07
Q9WUU7	Cathepsin Z OS=Mus musculus OX=10090 GN=Ctsz PE=1 SV=1	cathepsin Z	CTSZ	Cytoplasm	peptidase	0	0	21.658	12	3	9	3	1	306	34	6.6	100	3	0	0.943	1.102	0.626893	0.555875	84.7	109.3	104.1	77.6	98.2	104.8	88.5	114.8	117.8	9.39209e+06	1.22266e+07	1.15477e+07	8.59799e+06	1.11288e+07	1.17906e+07	9.81028e+06	1.27257e+07	1.31018e+07
Q60598	Src substrate cortactin OS=Mus musculus OX=10090 GN=Cttn PE=1 SV=2	cortactin	CTTN	Plasma Membrane	other	0	0	13.093	6	3	54	3	1	546	61.2	5.4	775	3	0	0.925	1.082	0.76302	0.675896	94.9	116.2	91.2	141.1	45.6	87.8	132.8	102.7	87.6	2.07049e+07	2.53493e+07	2.04114e+07	3.08556e+07	9.94907e+06	1.9843e+07	2.89614e+07	2.25815e+07	1.97755e+07
Q99LJ0	CTTNBP2 N-terminal-like protein OS=Mus musculus OX=10090 GN=Cttnbp2nl PE=1 SV=1	CTTNBP2 N-terminal like	CTTNBP2NL	Cytoplasm	other	0	0.034	2.491	1	1	9	1	1	638	69.8	7.71	97	1	0	1.106	1.215	0.213207	0.242842	60.8	95.7	93.7	89.6	103.6	123.7	113.8	80.8	138.4	332725	526722	515869	490559	572136	677534	623573	449906	761016
Q9JLB4	Cubilin OS=Mus musculus OX=10090 GN=Cubn PE=1 SV=3	cubilin	CUBN	Plasma Membrane	transmembrane receptor	0	0	1635.49	36	90	2164	90	1	3623	398.8	5.76	39055	90	0	0.948	0.965	0.856602	0.355276	88.8	81.6	142.3	84.2	60.4	194.4	85.7	68.6	94	1.26779e+09	1.16641e+09	2.03186e+09	1.2021e+09	8.6236e+08	2.77658e+09	1.22382e+09	9.79402e+08	1.3428e+09
Q9WTX6	Cullin-1 OS=Mus musculus OX=10090 GN=Cul1 PE=1 SV=1	cullin 1	CUL1	Nucleus	enzyme	0	0	44.896	6	3	24	3	1	776	89.6	8	486	3	0	1.718	0.91	0.279702	0.686599	79.9	90.2	86.6	157	148.8	63.5	117.2	78.9	77.9	5.53495e+06	6.23636e+06	6.70842e+06	1.07641e+07	1.07177e+07	4.39709e+06	8.35477e+06	5.41462e+06	5.48933e+06
Q9JLV5	Cullin-3 OS=Mus musculus OX=10090 GN=Cul3 PE=1 SV=1	cullin 3	CUL3	Nucleus	enzyme	0	0	95.372	12	7	115	7	1	768	88.9	8.46	1433	7	0	0.999	1.121	0.587742	0.423817	97.1	89.7	102.7	97.1	92.6	112.2	109.1	90.7	108.8	1.58955e+07	1.46825e+07	1.68077e+07	1.59063e+07	1.52726e+07	1.83712e+07	1.78653e+07	1.48583e+07	1.78064e+07
Q3TCH7	Cullin-4A OS=Mus musculus OX=10090 GN=Cul4a PE=1 SV=1	cullin 4A	CUL4A	Nucleus	other	0	0	39.282	10	5	39	5	1	759	87.7	8.35	556	5	0	1.004	1.155	0.558763	0.520297	98.3	92.8	106.5	106.2	98.7	70.7	129.1	84.1	113.5	4.49014e+06	4.23667e+06	4.89163e+06	4.90262e+06	4.50217e+06	3.3748e+06	5.89001e+06	3.84768e+06	5.17975e+06
Q9D5V5	Cullin-5 OS=Mus musculus OX=10090 GN=Cul5 PE=1 SV=3	cullin 5	CUL5	Nucleus	ion channel	0	0	11.002	2	2	20	2	1	780	90.9	7.81	885	2	0	0.994	0.484	0.781213	0.730541	128	36.6	139.2	127.2	142.8	69	139	56.2	62	7.25757e+06	3.38801e+06	7.89193e+06	7.2114e+06	8.09428e+06	5.05578e+06	7.91812e+06	4.46172e+06	4.61806e+06
Q8VE73	Cullin-7 OS=Mus musculus OX=10090 GN=Cul7 PE=1 SV=2	cullin 7	CUL7	Cytoplasm	other	0	0.064	1.981	0	1	3	1	1	1689	192.2	6.29	0	1	0
Q9CQ89	Protein CutA OS=Mus musculus OX=10090 GN=Cuta PE=1 SV=3	cutA divalent cation tolerance homolog	CUTA	Cytoplasm	other	1	0.037	2.404	23	1	4	1	1	177	18.9	6.77	0	1	0	1.389	0.925	0.123297	0.472964	98.1	59.1	94.2	92.5	136.7	130.9	115	86.3	87.1	372342	225979	357420	355940	518879	543661	436312	327553	330495
Q9D8X1	Copper homeostasis protein cutC homolog OS=Mus musculus OX=10090 GN=Cutc PE=1 SV=1	cutC copper transporter	CUTC	Cytoplasm	other	0	0	19.21	13	2	31	2	1	272	29	7.34	245	2	0	1.257	1.42	0.195743	0.606845	110.6	17.4	92.3	135.8	116.1	106.9	184.2	5.6	131.1	2.23289e+06	889010	2.03189e+06	2.90603e+06	2.34599e+06	2.15233e+06	3.79517e+06	131264	2.72556e+06
P70412	CUB and zona pellucida-like domain-containing protein 1 OS=Mus musculus OX=10090 GN=Cuzd1 PE=1 SV=2	CUB and zona pellucida like domains 1	CUZD1	Plasma Membrane	other	1	0	54.35	11	6	19	6	1	606	68	6.64	286	6	0	0.736	0.919	0.367408	0.375074	16.4	15.9	780.3	12.1	14	10.7	13.8	15.1	21.6	1.41308e+06	1.40309e+06	6.59737e+07	1.02605e+06	1.21001e+06	924643	1.17825e+06	1.38948e+06	1.89907e+06
Q91YL7	PGAP2-interacting protein OS=Mus musculus OX=10090 GN=Cwh43 PE=1 SV=1	cell wall biogenesis 43 C-terminal homolog	CWH43	membrane	other	10	0.001	6.701	2	1	2	1	1	699	78.1	8.91	45	1	0	2.328	2.759	0.056826	0.039556	43	42.4	69.3	100.2	147.7	80.5	104.5	118.7	193.6	296940	264837	476234	612762	908839	488746	633924	720423	1.17866e+06
O35188	Fractalkine OS=Mus musculus OX=10090 GN=Cx3cl1 PE=1 SV=3	C-X3-C motif chemokine ligand 1	CX3CL1	Extracellular Space	cytokine	1	0.007	4.447	2	1	14	1	1	395	42.1	5.54	276	1	0	0.766	1.256	0.098569	0.857575	99.8	134	103	68.5	98.8	79	129.4	146.9	40.6	5.9373e+06	7.99348e+06	6.17122e+06	4.05908e+06	5.92432e+06	4.71283e+06	7.66364e+06	8.98215e+06	2.40095e+06
P97792	Coxsackievirus and adenovirus receptor homolog OS=Mus musculus OX=10090 GN=Cxadr PE=1 SV=1	CXADR Ig-like cell adhesion molecule	CXADR	Plasma Membrane	transmembrane receptor	1	0	73.275	17	6	111	6	1	365	39.9	6.96	2402	6	0	1.149	1.62	0.0589	0.06662	80.9	71.6	86	105.4	89.9	93	150.7	91.4	131.1	2.63002e+07	2.32563e+07	2.8053e+07	3.44151e+07	2.93329e+07	3.02094e+07	4.92322e+07	2.96961e+07	4.26005e+07
P40224	Stromal cell-derived factor 1 OS=Mus musculus OX=10090 GN=Cxcl12 PE=2 SV=2	C-X-C motif chemokine ligand 12	CXCL12	Extracellular Space	cytokine	0	0	14.131	15	1	1	1	1	93	10.6	9.74	83	1	0	0.745	0.669	0.389642	0.025328	102.4	117.5	143.9	82.7	134.4	87.5	78.7	70.4	82.6	2.66575e+06	3.03575e+06	3.71785e+06	2.14613e+06	3.47521e+06	2.26224e+06	2.03398e+06	1.85951e+06	2.16325e+06
Q9WUE3	Cytochrome b561 domain-containing protein 2 OS=Mus musculus OX=10090 GN=Cyb561d2 PE=2 SV=1	cytochrome b561 family member D2	CYB561D2	Cytoplasm	enzyme	6	0.013	3.517	12	1	1	1	1	222	24.2	10.13	20	1	0
P56395	Cytochrome b5 OS=Mus musculus OX=10090 GN=Cyb5a PE=1 SV=2	cytochrome b5 type A	CYB5A	Cytoplasm	enzyme	1	0	251.02	93	11	655	11	1	134	15.2	5.07	13221	11	0	1.192	0.9	0.120689	0.377174	84	93.3	110.6	111.2	109.2	135.9	83.9	98.8	73.1	1.17928e+09	1.30911e+09	1.55194e+09	1.56083e+09	1.5335e+09	1.91014e+09	1.18078e+09	1.3882e+09	1.02809e+09
Q9CQX2	Cytochrome b5 type B OS=Mus musculus OX=10090 GN=Cyb5b PE=1 SV=1	cytochrome b5 type B	CYB5B	Cytoplasm	enzyme	1	0	115.906	47	5	163	5	1	146	16.3	4.89	3151	5	0	0.531	0.587	0.014827	0.017474	134.9	145.6	124.6	101.2	57.7	71.6	79.1	108.8	76.4	3.28491e+08	3.51315e+08	3.00629e+08	2.44978e+08	1.39859e+08	1.72897e+08	1.9121e+08	2.62651e+08	1.85247e+08
Q9DB73	NADH-cytochrome b5 reductase 1 OS=Mus musculus OX=10090 GN=Cyb5r1 PE=1 SV=1	cytochrome b5 reductase 1	CYB5R1	Cytoplasm	enzyme	1	0	86.485	32	5	35	5	1	305	34.1	8.87	394	5	0	0.844	1.038	0.998261	0.428824	109.9	39.3	125	110.5	71.2	92.7	139.7	97.3	114.1	5.27613e+06	1.87847e+06	6.0034e+06	5.28476e+06	3.39904e+06	4.44362e+06	6.71721e+06	4.81035e+06	5.49459e+06
Q9DCN2	NADH-cytochrome b5 reductase 3 OS=Mus musculus OX=10090 GN=Cyb5r3 PE=1 SV=3	cytochrome b5 reductase 3	Cyb5r3	Cytoplasm	enzyme	0	0	359.292	57	13	640	13	1	301	34.1	8.38	11970	13	0	1.052	0.984	0.661428	0.836558	99	75.6	116.7	108.5	104.1	96.3	109.4	97.4	93	4.32548e+08	3.3034e+08	5.09769e+08	4.74179e+08	4.55139e+08	4.20887e+08	4.78264e+08	4.25401e+08	4.06084e+08
Q61462	Cytochrome b-245 light chain OS=Mus musculus OX=10090 GN=Cyba PE=1 SV=3	cytochrome b-245 alpha chain	CYBA	Cytoplasm	enzyme	3	0	34.124	28	3	84	3	1	192	20.7	9.23	96	3	0	1.305	1.817	0.108154	0.001115	64.8	70.1	76.3	87.9	142.2	91.5	111.9	127.8	127.5	1.26303e+07	1.37501e+07	1.49223e+07	1.71465e+07	2.77196e+07	1.78466e+07	2.18202e+07	2.49266e+07	2.48574e+07
Q61093	Cytochrome b-245 heavy chain OS=Mus musculus OX=10090 GN=Cybb PE=1 SV=1	cytochrome b-245 beta chain	CYBB	Cytoplasm	enzyme	4	0	174.12	23	12	195	12	1	570	65.3	7.72	2301	12	0	2.16	2.7	0.008386	0.017811	48.9	48.6	72.5	99.3	124.7	105.7	132.1	102.7	165.4	4.4525e+07	4.46796e+07	6.5975e+07	9.04084e+07	1.13579e+08	9.64471e+07	1.20254e+08	9.35741e+07	1.50668e+08
Q3TYS2	Cytochrome b-245 chaperone 1 OS=Mus musculus OX=10090 GN=Cybc1 PE=1 SV=2	cytochrome b-245 chaperone 1	CYBC1	Cytoplasm	other	1	0	9.878	5	1	1	1	1	187	20.9	8.59	61	1	0	1.261	1.673	0.465515	0.191939	81.2	69	104.1	103.4	79.7	102.3	135.8	80.3	144.2	2.19105e+06	1.86101e+06	2.80733e+06	2.77287e+06	2.13012e+06	2.74994e+06	3.62837e+06	2.15101e+06	3.84871e+06
Q9D0M3	Cytochrome c1, heme protein, mitochondrial OS=Mus musculus OX=10090 GN=Cyc1 PE=1 SV=1	cytochrome c1	CYC1	Cytoplasm	enzyme	1	0	272.848	45	9	699	9	1	325	35.3	9.16	11229	9	0	0.915	1.031	0.556586	0.752028	82.5	98.8	122.3	103.4	85.3	90.4	96.1	101.9	119.3	4.46411e+08	5.35467e+08	6.6223e+08	5.59787e+08	4.62146e+08	4.89067e+08	5.20433e+08	5.52982e+08	6.46397e+08
P62897	Cytochrome c, somatic OS=Mus musculus OX=10090 GN=Cycs PE=1 SV=2	cytochrome c, somatic	CYCS	Cytoplasm	transporter	0	0	296.572	77	19	1080	15	1	105	11.6	9.58	14353	19	6	0.995	0.971	0.654162	0.721186	112.7	86.6	104.7	112.2	62.7	104.2	121.3	93.9	101.7	2.5479e+09	1.95736e+09	2.36847e+09	2.54081e+09	1.41992e+09	2.35737e+09	2.74303e+09	2.12571e+09	2.29962e+09
P00015	Cytochrome c, testis-specific OS=Mus musculus OX=10090 GN=Cyct PE=1 SV=3	cytochrome c, testis	Cyct	Cytoplasm	other	0	0	25.956	38	6	369	2	1	105	11.7	9.51	1180	6	0
Q7TMB8	Cytoplasmic FMR1-interacting protein 1 OS=Mus musculus OX=10090 GN=Cyfip1 PE=1 SV=1	cytoplasmic FMR1 interacting protein 1	CYFIP1	Cytoplasm	translation regulator	0	0	253.399	21	22	333	8	1	1253	145.1	6.9	6220	22	15	1.214	1.148	0.202913	0.309125	82.9	101.1	86.3	93.4	137.3	104.8	90.8	99	104.4	2.00294e+08	2.44295e+08	2.08319e+08	2.2542e+08	3.3147e+08	2.53021e+08	2.19225e+08	2.39659e+08	2.52053e+08
Q5SQX6	Cytoplasmic FMR1-interacting protein 2 OS=Mus musculus OX=10090 GN=Cyfip2 PE=1 SV=2	cytoplasmic FMR1 interacting protein 2	CYFIP2	Cytoplasm	other	0	0	236.686	17	18	321	4	1	1253	145.6	7.05	6613	18	0	1.234	1.035	0.099511	0.824859	107.4	87	85.8	118.1	106	107.3	90	83.9	114.6	2.62893e+07	2.12524e+07	2.09552e+07	2.88487e+07	2.59566e+07	2.63191e+07	2.20228e+07	2.11483e+07	2.80954e+07
Q8BKE6	Cytochrome P450 20A1 OS=Mus musculus OX=10090 GN=Cyp20a1 PE=1 SV=1	cytochrome P450 family 20 subfamily A member 1	CYP20A1	membrane	enzyme	1	0	13.687	2	1	5	1	1	462	52.1	6.95	87	1	0	1.02	1.155	0.736601	0.507488	109	30	123.8	126.4	62.9	111.2	132.9	77.8	126	1.70883e+06	473487	1.92522e+06	1.9713e+06	978746	1.79272e+06	2.07524e+06	1.21016e+06	1.96697e+06
Q64441	1,25-dihydroxyvitamin D(3) 24-hydroxylase, mitochondrial OS=Mus musculus OX=10090 GN=Cyp24a1 PE=2 SV=1	cytochrome P450 family 24 subfamily A member 1	CYP24A1	Cytoplasm	enzyme	0	0.014	3.495	3	1	1	1	1	514	59.4	9.03	17	1	0	0.582	1.221	0.474323	0.878699	110.1	43	173.8	64.1	33.5	121.2	134.4	181.1	38.9	442885	175294	695050	256338	135330	488071	537656	724062	160065
Q9DBG1	Sterol 26-hydroxylase, mitochondrial OS=Mus musculus OX=10090 GN=Cyp27a1 PE=1 SV=1	cytochrome P450 family 27 subfamily A member 1	CYP27A1	Cytoplasm	enzyme	0	0.015	3.339	5	1	5	1	1	533	60.7	9.14	21	1	0	0.64	0.264	0.633418	0.34709	172.8	38.6	245.1	115.8		105.8	20.2	45.7	156	274822	60940.2	387716	183797		168043	31946.2	72085.4	248476
P20852	Cytochrome P450 2A5 OS=Mus musculus OX=10090 GN=Cyp2a5 PE=2 SV=1	cytochrome P450 family 2 subfamily A member 6	CYP2A6 (includes others)	Cytoplasm	enzyme	1	0	244.31	55	26	382	6	1	494	56.7	9.2	4766	26	0	0.709	1.602	0.009081	0.680612	123.5	88.7	91.8	60.8	92.1	65.1	147.1	188.2	42.7	4.70428e+07	3.38021e+07	3.50705e+07	2.31616e+07	3.50424e+07	2.48119e+07	5.60515e+07	7.22287e+07	1.62673e+07
P15392	Cytochrome P450 2A4 OS=Mus musculus OX=10090 GN=Cyp2a4 PE=2 SV=3	cytochrome P450 family 2 subfamily A member 6	CYP2A6 (includes others)	Cytoplasm	enzyme	1	0	253.734	58	27	427	7	1	494	56.7	9.11	4954	27	20	0.806	0.983	0.009081	0.680612	118.5	104.2	111.1	84.3	89.5	92.4	109.2	138.2	52.5	2.77361e+08	2.44589e+08	2.60409e+08	1.97545e+08	2.09979e+08	2.16719e+08	2.55639e+08	3.23645e+08	1.23202e+08
Q8CIM7	Cytochrome P450 2D26 OS=Mus musculus OX=10090 GN=Cyp2d26 PE=1 SV=1	cytochrome P450, family 2, subfamily d, polypeptide 26	Cyp2d26	Cytoplasm	enzyme	2	0	187.139	44	16	217	14	1	500	56.9	6.64	3559	16	2	0.951	1.04	0.854281	0.646464	84.3	95	131.7	90.4	124.8	84.6	99.4	91	98.9	1.02203e+08	1.1531e+08	1.59726e+08	1.09597e+08	1.5162e+08	1.02571e+08	1.20735e+08	1.10703e+08	1.19919e+08
P11714	Cytochrome P450 2D9 OS=Mus musculus OX=10090 GN=Cyp2d9 PE=1 SV=2	cytochrome P450, family 2, subfamily d, polypeptide 9	Cyp2d9 (includes others)	Cytoplasm	other	0	0	135.953	28	11	184	9	1	504	56.9	6.21	3481	11	0	1.011	0.713	0.820928	0.23386	76.5	104	143.6	80.4	160.9	105.1	74.2	97.1	58.2	4.2559e+07	5.80155e+07	8.01381e+07	4.47702e+07	8.96337e+07	5.85457e+07	4.15378e+07	5.40984e+07	3.24146e+07
Q05421	Cytochrome P450 2E1 OS=Mus musculus OX=10090 GN=Cyp2e1 PE=1 SV=1	cytochrome P450 family 2 subfamily E member 1	CYP2E1	Cytoplasm	enzyme	1	0	489.663	57	34	905	34	1	493	56.8	8.4	12096	34	0	0.89	0.972	0.389172	0.400672	105.4	93.2	120.5	109.3	93.8	85.5	87	102.5	102.9	7.36741e+08	6.52047e+08	8.42478e+08	7.63993e+08	6.55975e+08	5.97939e+08	6.0802e+08	7.16731e+08	7.19022e+08
O54750	Cytochrome P450 2J6 OS=Mus musculus OX=10090 GN=Cyp2j6 PE=2 SV=2	cytochrome P450 family 2 subfamily J member 2	CYP2J2	Cytoplasm	enzyme	2	0	34.926	12	6	101	3	1	501	57.8	8.44	1096	6	0	0.769	0.513	0.587824	0.229397	136.5	77.8	144	52.6	105	141.9	57.3	115	70	2.50771e+07	1.17235e+07	2.46902e+07	7.95661e+06	1.57911e+07	2.77428e+07	8.64161e+06	1.83705e+07	1.05492e+07
O54749	Cytochrome P450 2J5 OS=Mus musculus OX=10090 GN=Cyp2j5 PE=1 SV=1	cytochrome P450, family 2, subfamily j, polypeptide 5	Cyp2j5	Cytoplasm	enzyme	1	0	406.438	61	28	698	25	1	501	57.7	8.73	5750	28	2	1.023	0.911	0.783535	0.234201	102.2	102.5	121.2	98.3	115.6	104.9	93.4	107	55	5.61068e+08	5.6223e+08	6.65653e+08	5.39589e+08	6.34505e+08	5.74237e+08	5.14347e+08	5.91864e+08	3.01473e+08
Q9DBX6	Cytochrome P450 2S1 OS=Mus musculus OX=10090 GN=Cyp2s1 PE=1 SV=1	cytochrome P450 family 2 subfamily S member 1	CYP2S1	Cytoplasm	enzyme	2	0	45.024	14	4	54	4	1	501	55.6	8.78	437	4	0	1.19	1.205	0.274028	0.022073	78.4	91.5	91.3	108.7	120	80.3	117.8	110	102	6.02501e+06	7.04308e+06	7.20815e+06	8.31352e+06	9.63484e+06	6.24123e+06	9.09157e+06	8.49801e+06	8.03418e+06
O88833	Cytochrome P450 4A10 OS=Mus musculus OX=10090 GN=Cyp4a10 PE=2 SV=2	cytochrome P450 family 4 subfamily A member 11	CYP4A11	Cytoplasm	enzyme	2	0	257.917	48	19	440	16	1	509	58.3	8.75	5780	19	3	1.102	1.219	0.385208	0.111106	86.3	78.9	104.9	95.1	126.4	89.2	110.4	105.3	103.4	1.66769e+08	1.52486e+08	2.026e+08	1.83787e+08	2.44376e+08	1.72401e+08	2.13178e+08	2.0333e+08	1.99712e+08
O35728	Cytochrome P450 4A14 OS=Mus musculus OX=10090 GN=Cyp4a14 PE=1 SV=1	cytochrome P450, family 4, subfamily a, polypeptide 14	Cyp4a14	Cytoplasm	enzyme	2	0	173.495	34	13	236	9	1	507	58.7	8.78	4107	13	2	1.277	1.541	0.379692	0.328554	87.1	69.3	87.7	111.1	139.1	62.5	152	57.1	134.2	7.83708e+07	6.23652e+07	7.89188e+07	1.00085e+08	1.25242e+08	5.62558e+07	1.36802e+08	5.13927e+07	1.20855e+08
Q91WL5	Cytochrome P450 4A12A OS=Mus musculus OX=10090 GN=Cyp4a12a PE=1 SV=2	cytochrome P450 family 4 subfamily A member 22	CYP4A22	Cytoplasm	enzyme	0	0	151.437	31	12	212	7	1	508	58.3	9.13	3911	12	0	1.424	1.118	0.300556	0.990356	84.6	74.5	121.5	120.5	96.1	123.6	94.6	145.2	39.5	2.92288e+07	2.5707e+07	4.18847e+07	4.15806e+07	3.31157e+07	4.25946e+07	3.27866e+07	5.017e+07	1.36345e+07
Q64462	Cytochrome P450 4B1 OS=Mus musculus OX=10090 GN=Cyp4b1 PE=1 SV=1	cytochrome P450 family 4 subfamily B member 1	CYP4B1	Cytoplasm	enzyme	1	0	1477.75	80	49	7213	49	1	511	58.9	8.44	111461	49	0	1.025	0.965	0.324607	0.874682	107.4	76.1	108	105.4	110	112.2	103.6	118.6	58.8	7.7113e+09	5.46621e+09	7.76031e+09	7.56728e+09	7.9049e+09	8.05553e+09	7.44132e+09	8.53753e+09	4.22622e+09
Q9EP75	Leukotriene-B4 omega-hydroxylase 3 OS=Mus musculus OX=10090 GN=Cyp4f14 PE=1 SV=1	cytochrome P450 family 4 subfamily F member 12	CYP4F12	Cytoplasm	enzyme	0	0.027	2.69	2	1	1	1	1	524	59.8	6.87	0	1	0	1.181	0.874	0.86765	0.731807	120.3	126.7	87.7	49.3	163	142.1		112.2	98.6	3.33231e+06	3.47278e+06	2.37121e+06	1.87392e+06	4.37105e+06	3.85293e+06		3.0087e+06	2.65367e+06
Q99N16	Leukotriene-B(4) omega-hydroxylase 2 OS=Mus musculus OX=10090 GN=Cyp4f3 PE=1 SV=2	cytochrome P450 family 4 subfamily F member 2	CYP4F2	Cytoplasm	enzyme	1	0.013	3.508	2	1	8	1	1	524	59.8	8.53	54	1	0	1.111	0.91	0.483082	0.886414	90.8	43.4	132.2	83.7	163.9	100.8	82.6	155.5	47	691730	331029	1.00747e+06	637413	1.24869e+06	768305	629140	1.18509e+06	622251
Q8K0C4	Lanosterol 14-alpha demethylase OS=Mus musculus OX=10090 GN=Cyp51a1 PE=1 SV=1	cytochrome P450 family 51 subfamily A member 1	CYP51A1	Cytoplasm	enzyme	1	0	276.516	62	20	404	20	1	503	56.7	8.41	3560	20	0	0.986	0.858	0.716073	0.170605	106.9	96.7	131.7	94.8	120.1	105.5	91.8	100.5	52.1	2.03239e+08	1.83697e+08	2.49355e+08	1.80606e+08	2.27405e+08	2.00078e+08	1.7375e+08	1.9071e+08	9.87083e+07
Q60991	25-hydroxycholesterol 7-alpha-hydroxylase OS=Mus musculus OX=10090 GN=Cyp7b1 PE=1 SV=2	cytochrome P450 family 7 subfamily B member 1	CYP7B1	Cytoplasm	enzyme	3	0	214.993	23	11	312	11	1	507	58.4	9.09	4290	11	0	1.365	0.963	0.107138	0.643452	90.1	78.3	110.2	102.7	132.2	122.9	86.7	94.7	82.2	1.53833e+08	1.3374e+08	1.88076e+08	1.75281e+08	2.25669e+08	2.09985e+08	1.48203e+08	1.62364e+08	1.40261e+08
Q9QX11	Cytohesin-1 OS=Mus musculus OX=10090 GN=Cyth1 PE=1 SV=2	cytohesin 1	CYTH1	Cytoplasm	other	0	0.001	7.535	6	2	21	1	1	398	46.2	5.63	216	2	0	1.031	1.052	0.771372	0.35214	49.2	99.6	118.3	66.2	102.7	122.9	100.5	104.7	136	321010	648257	770453	446984	669155	799909	657549	689836	888909
P63034	Cytohesin-2 OS=Mus musculus OX=10090 GN=Cyth2 PE=1 SV=2	cytohesin 2	CYTH2	Cytoplasm	other	0	0.001	6.376	6	2	16	1	1	400	46.6	5.63	127	2	1	1.043	1.001	0.809412	0.475806	69.7	104.4	111	73.8	108.9	116.6	102.5	104.5	108.6	4.3795e+06	6.57635e+06	6.96937e+06	4.64598e+06	6.83978e+06	7.32253e+06	6.441e+06	6.56703e+06	6.8376e+06
O08967	Cytohesin-3 OS=Mus musculus OX=10090 GN=Cyth3 PE=1 SV=1	cytohesin 3	CYTH3	Cytoplasm	other	0	0.004	4.997	6	2	9	1	1	399	46.3	5.54	82	2	0	2.054	2.248	0.332099	0.139064	55.6	122.9	14.8	87.4	149.5		125.1	110.9	233.8	178683	393699	50627.7	279878	479460		400762	356109	753342
Q8BPM0	Disheveled-associated activator of morphogenesis 1 OS=Mus musculus OX=10090 GN=Daam1 PE=1 SV=4	dishevelled associated activator of morphogenesis 1	DAAM1	Cytoplasm	other	0	0	102.746	18	15	114	14	1	1077	123.3	7.46	1499	15	1	1.455	1.657	0.10318	0.015634	97	70.7	69.3	117.3	102.9	91.1	122.3	112.2	117.2	3.30068e+07	2.42541e+07	2.42577e+07	4.04342e+07	3.53073e+07	3.15014e+07	4.18718e+07	3.84469e+07	3.99658e+07
Q80U19	Disheveled-associated activator of morphogenesis 2 OS=Mus musculus OX=10090 GN=Daam2 PE=1 SV=4	dishevelled associated activator of morphogenesis 2	DAAM2	Cytoplasm	other	0	0	72.308	11	9	45	8	1	1115	128.3	6.92	512	9	0	1.106	1.023	0.833702	0.515702	89.8	91.5	132.2	101.2	98.2	104.7	93.6	86.7	102.1	1.19024e+07	1.20216e+07	1.73859e+07	1.3252e+07	1.28666e+07	1.37188e+07	1.24195e+07	1.13528e+07	1.34617e+07
P98078	Disabled homolog 2 OS=Mus musculus OX=10090 GN=Dab2 PE=1 SV=2	DAB adaptor protein 2	DAB2	Plasma Membrane	other	0	0	312.601	26	20	571	20	1	766	82.3	6.1	8784	20	0	0.729	0.91	0.192078	0.136865	103.5	108.3	121.5	78.9	78.8	114.4	90.4	105.6	98.6	4.38837e+08	4.59177e+08	5.14976e+08	3.346e+08	3.33829e+08	4.84824e+08	3.8296e+08	4.47751e+08	4.17859e+08
P61804	Dolichyl-diphosphooligosaccharide--protein glycosyltransferase subunit DAD1 OS=Mus musculus OX=10090 GN=Dad1 PE=1 SV=3	defender against cell death 1	DAD1	Cytoplasm	other	3	0	19.331	19	2	24	2	1	113	12.5	7.08	556	2	0	1.088	0.955	0.718846	0.668241	115.2	61.3	105.8	115.1	72.2	121.3	101	87	121.1	1.7158e+07	9.13285e+06	1.57672e+07	1.71412e+07	1.07521e+07	1.8119e+07	1.50473e+07	1.29568e+07	1.81665e+07
Q62165	Dystroglycan OS=Mus musculus OX=10090 GN=Dag1 PE=1 SV=4	dystroglycan 1	DAG1	Plasma Membrane	transmembrane receptor	1	0	38.465	8	4	26	4	1	893	96.8	8.44	210	4	0	1.002	1.083	0.316366	0.16287	77.1	96.7	95.4	108.8	95.7	92.4	132.9	97.6	103.4	1.89759e+07	2.34316e+07	2.32767e+07	2.63807e+07	2.33237e+07	2.25263e+07	3.22986e+07	2.37979e+07	2.50672e+07
Q91WC9	Sn1-specific diacylglycerol lipase beta OS=Mus musculus OX=10090 GN=Daglb PE=1 SV=2	diacylglycerol lipase beta	DAGLB	Plasma Membrane	enzyme	4	0	29.919	6	4	39	4	1	669	73.9	6.73	477	4	0	0.851	0.897	0.025075	0.174205	107.3	104.5	120.6	95.9	91.3	89	109	96.3	86	1.57213e+07	1.51318e+07	1.75728e+07	1.39942e+07	1.32328e+07	1.29364e+07	1.58862e+07	1.39607e+07	1.26525e+07
Q6PJN8	DALR anticodon-binding domain-containing protein 3 OS=Mus musculus OX=10090 GN=Dalrd3 PE=2 SV=1	DALR anticodon binding domain containing 3	DALRD3	Other	other	0	0.106	1.592	6	1	1	1	1	538	58.7	8.15	31	1	0	0.987	0.63	0.713875	0.511072	144.2	79.6	170.9	213.9	94.8		135.8	60.7		66452.7	36697	78767.8	101242	43680.6		62576	27969.3
P18894	D-amino-acid oxidase OS=Mus musculus OX=10090 GN=Dao PE=1 SV=3	D-amino acid oxidase	DAO	Cytoplasm	enzyme	0	0	56.637	30	6	53	6	1	345	38.6	7.58	806	6	0	1.369	1.649	0.145644	0.074532	72	48.8	70.6	96.7	179.4	83.1	152.2	80.7	116.5	1.25455e+07	8.54169e+06	1.24017e+07	1.67898e+07	3.13273e+07	1.47974e+07	2.65842e+07	1.4156e+07	2.05683e+07
Q9ER88	28S ribosomal protein S29, mitochondrial OS=Mus musculus OX=10090 GN=Dap3 PE=1 SV=1	death associated protein 3	DAP3	Cytoplasm	other	0	0	142.537	40	13	124	13	1	391	44.7	8.94	2203	13	0	0.876	0.987	0.693917	0.989936	93	104.4	106.4	91.4	113.1	88	104.7	103	95.9	6.85633e+07	7.70001e+07	7.857e+07	6.76434e+07	8.34689e+07	6.49108e+07	7.72823e+07	7.59852e+07	7.0732e+07
Q80YE7	Death-associated protein kinase 1 OS=Mus musculus OX=10090 GN=Dapk1 PE=1 SV=3	death associated protein kinase 1	DAPK1	Cytoplasm	kinase	0	0	31.231	5	4	36	4	1	1442	161.3	6.89	259	4	0	0.674	0.636	0.097106	0.297881	90.2	149	126.8	74.7	90.7	85.5	80.7	125.3	77.1	3.75767e+06	6.26171e+06	5.2791e+06	3.11087e+06	3.78008e+06	3.56057e+06	3.35774e+06	5.24603e+06	3.2076e+06
Q922B2	Aspartate--tRNA ligase, cytoplasmic OS=Mus musculus OX=10090 GN=Dars PE=1 SV=2	aspartyl-tRNA synthetase 1	DARS1	Cytoplasm	enzyme	0	0	307.175	58	27	505	27	1	501	57.1	6.49	8868	27	0	1.23	0.902	0.254618	0.343822	78	93.5	111.6	94.2	115	156.2	84.3	80.7	86.4	2.39006e+08	2.86268e+08	3.41864e+08	2.88664e+08	3.52268e+08	4.78368e+08	2.58269e+08	2.47207e+08	2.64607e+08
Q9JII5	DAZ-associated protein 1 OS=Mus musculus OX=10090 GN=Dazap1 PE=1 SV=2	DAZ associated protein 1	Dazap1	Cytoplasm	other	0	0.014	3.5	5	1	1	1	1	406	43.2	8.56	0	1	0	1.594	1.095	0.243251	0.738104	145.3		87.1	208.4		154.2		62.5	242.5	1.8179e+06		1.09238e+06	2.6082e+06		1.92957e+06		782533	3.03382e+06
Q9DCP9	DAZ-associated protein 2 OS=Mus musculus OX=10090 GN=Dazap2 PE=1 SV=1	DAZ associated protein 2	DAZAP2	Nucleus	other	0	0	65.419	22	1	30	1	1	168	17.3	7.33	214	1	0	1.221	1.335	0.726609	0.676227	145.7	35.3	90.1	78.3	121.5	110	124	74.8	120.3	3.20661e+06	778786	1.99618e+06	1.79225e+06	2.77869e+06	2.44821e+06	2.73088e+06	1.68276e+06	2.6871e+06
P31786	Acyl-CoA-binding protein OS=Mus musculus OX=10090 GN=Dbi PE=1 SV=2	diazepam binding inhibitor, acyl-CoA binding protein	DBI	Cytoplasm	other	0	0	120.471	54	5	221	5	1	87	10	8.82	2134	5	0	1.346	1.312	0.225441	0.432702	93.6	64.8	83.7	112.7	79.9	176.1	109.8	64.7	114.7	1.6567e+08	1.14118e+08	1.47475e+08	1.99083e+08	1.40688e+08	3.10189e+08	1.94002e+08	1.14161e+08	2.02176e+08
Q9QXS6	Drebrin OS=Mus musculus OX=10090 GN=Dbn1 PE=1 SV=4	drebrin 1	DBN1	Cytoplasm	other	0	0.001	9.048	2	1	1	1	1	706	77.2	4.49	23	1	0	0.553	1.57	0.457571	0.217511		180.2	143.1	37.6	88.8	198.4		252			1.23615e+06	966390	253771	1.10544e+06	1.33986e+06		1.70244e+06
Q62418	Drebrin-like protein OS=Mus musculus OX=10090 GN=Dbnl PE=1 SV=2	drebrin like	DBNL	Cytoplasm	other	0	0	90.045	19	6	89	6	1	436	48.7	4.92	1939	6	0	1.248	1.17	0.126431	0.248956	64.9	104.1	87.3	108.9	131.3	100.5	103.9	96.9	102.2	1.94108e+07	3.09189e+07	2.589e+07	3.23591e+07	3.91893e+07	2.98143e+07	3.08984e+07	2.88649e+07	3.03069e+07
P53395	Lipoamide acyltransferase component of branched-chain alpha-keto acid dehydrogenase complex, mitochondrial OS=Mus musculus OX=10090 GN=Dbt PE=1 SV=2	dihydrolipoamide branched chain transacylase E2	DBT	Cytoplasm	enzyme	0	0	169.508	42	13	254	13	1	482	53.2	8.6	2593	13	0	1.659	1.342	0.053464	0.180381	63.2	68	97.2	106.1	112.8	149.8	123	91.2	88.7	6.01563e+07	6.5918e+07	9.23021e+07	1.01681e+08	1.07223e+08	1.42691e+08	1.17443e+08	8.83248e+07	8.42635e+07
Q91VU6	DDB1- and CUL4-associated factor 11 OS=Mus musculus OX=10090 GN=Dcaf11 PE=1 SV=1	DDB1 and CUL4 associated factor 11	DCAF11	Nucleus	other	0	0.001	9.589	4	2	8	2	1	549	62	6.44	56	2	0	1.007	0.85	0.590984	0.43254	89.1	118.9	100.7	101.4	138.8	96.4	117	85.6	52.1	2.26924e+06	3.03273e+06	2.62292e+06	2.61877e+06	3.59112e+06	2.49326e+06	3.01098e+06	2.27091e+06	1.40809e+06
Q8N7N5	DDB1- and CUL4-associated factor 8 OS=Mus musculus OX=10090 GN=Dcaf8 PE=1 SV=1	DDB1 and CUL4 associated factor 8	DCAF8	Nucleus	other	0	0	37.084	10	4	35	4	1	591	66	5.87	281	4	0	0.859	1.025	0.661815	0.390926	91.4	137.3	100.4	74.7	135.2	86.3	103	105.3	66.4	1.34484e+07	2.01017e+07	1.46516e+07	1.0898e+07	1.97246e+07	1.25991e+07	1.50199e+07	1.53897e+07	9.67948e+06
Q8BHC4	Dephospho-CoA kinase domain-containing protein OS=Mus musculus OX=10090 GN=Dcakd PE=1 SV=1	dephospho-CoA kinase domain containing	DCAKD	Cytoplasm	other	1	0.001	7.798	6	1	2	1	1	231	26.5	9.58	26	1	0	1.061	0.957	0.526443	0.658816	93.8	92.4	138.4	65.4	99.5	115.7	79	89.7	126.2	538969	494048	777366	361117	537972	641052	444455	526131	709594
Q8BWQ5	Serine/threonine-protein kinase DCLK3 OS=Mus musculus OX=10090 GN=Dclk3 PE=2 SV=2	doublecortin like kinase 3	DCLK3	Cytoplasm	kinase	0	0.09	1.727	2	1	1	1	1	790	88.2	8.9	0	1	0
P28654	Decorin OS=Mus musculus OX=10090 GN=Dcn PE=1 SV=1	decorin	DCN	Extracellular Space	other	0	0.001	5.911	3	1	9	1	1	354	39.8	8.68	56	1	0	0.756	0.229	0.91866	0.003692	119.4	146.3	136.9	36.3	242.8	103.5	18.8	31.4	64.6	5.36108e+06	7.41523e+06	6.16929e+06	3.01105e+06	1.18593e+07	4.64627e+06	1.68384e+06	2.17611e+06	2.90543e+06
Q9DAR7	m7GpppX diphosphatase OS=Mus musculus OX=10090 GN=Dcps PE=1 SV=1	decapping enzyme, scavenger	DCPS	Nucleus	enzyme	0	0	10.092	3	1	1	1	1	338	39	6.48	41	1	0	1.57	0.926	0.181877	0.970454		144.7		213.5	241.6		217.9	82.4			1.21316e+06		1.80341e+06	2.0018e+06		1.8322e+06	682574
O08788	Dynactin subunit 1 OS=Mus musculus OX=10090 GN=Dctn1 PE=1 SV=3	dynactin subunit 1	DCTN1	Cytoplasm	other	0	0	239.784	24	21	238	21	1	1281	141.6	5.9	4316	21	0	1.393	1.229	0.227144	0.491708	79.9	100.9	75	111.3	168	85.8	101	98.2	80	7.36936e+07	9.31545e+07	6.90696e+07	1.02433e+08	1.55119e+08	7.90285e+07	9.30248e+07	9.06603e+07	7.36503e+07
Q99KJ8	Dynactin subunit 2 OS=Mus musculus OX=10090 GN=Dctn2 PE=1 SV=3	dynactin subunit 2	DCTN2	Cytoplasm	other	0	0	121.01	34	10	107	10	1	402	44.1	5.26	3172	10	0	1.389	1.315	0.08765	0.173802	77.8	98.3	60.8	108.1	142.1	100.2	123.9	102.3	86.6	4.35518e+07	5.5198e+07	3.40125e+07	6.05508e+07	7.95515e+07	5.60561e+07	6.92756e+07	5.77605e+07	4.84607e+07
Q9Z0Y1	Dynactin subunit 3 OS=Mus musculus OX=10090 GN=Dctn3 PE=1 SV=2	dynactin subunit 3	DCTN3	Nucleus	other	0	0	11.914	13	2	6	2	1	186	21	6.06	50	2	0	1.324	1.032	0.048675	0.488133	71.3	88.4	101.5	117.2	106.4	117	126.1	81	91.2	2.01305e+06	2.48364e+06	2.85543e+06	3.2922e+06	3.00887e+06	3.29952e+06	3.55176e+06	2.29174e+06	2.56793e+06
Q8CBY8	Dynactin subunit 4 OS=Mus musculus OX=10090 GN=Dctn4 PE=1 SV=1	dynactin subunit 4	DCTN4	Nucleus	other	0	0	24.467	6	2	17	2	1	467	53	7.72	103	2	0	2.56	2.782	0.017516	0.006355	50.4	24.7	46.1	117.9	178.3	105.1	149.3	128.1	100.1	4.67794e+06	4.7056e+06	6.12823e+06	8.92204e+06	1.35126e+07	8.00799e+06	1.12972e+07	9.69281e+06	7.6294e+06
Q91X52	L-xylulose reductase OS=Mus musculus OX=10090 GN=Dcxr PE=1 SV=2	dicarbonyl and L-xylulose reductase	DCXR	Cytoplasm	enzyme	0	0	22.16	20	4	27	4	1	244	25.7	7.31	683	4	0	1.484	1.469	0.138783	0.143888	81.4	81.1	83.7	120.8	80.4	132.6	119.6	79.6	120.9	6.03459e+06	6.04141e+06	6.20285e+06	8.95096e+06	5.99934e+06	9.82444e+06	8.87465e+06	5.8996e+06	8.96215e+06
Q9CWS0	N(G),N(G)-dimethylarginine dimethylaminohydrolase 1 OS=Mus musculus OX=10090 GN=Ddah1 PE=1 SV=3	dimethylarginine dimethylaminohydrolase 1	DDAH1	Cytoplasm	enzyme	0	0	94.851	66	9	78	8	1	285	31.4	5.97	980	9	0	2.019	1.451	0.011786	0.149338	84.2	67.7	62.2	150.9	109.3	136.8	116.5	74	98.3	1.93047e+07	1.54972e+07	1.4211e+07	3.44902e+07	2.5102e+07	3.12603e+07	2.66194e+07	1.7071e+07	2.25474e+07
Q99LD8	N(G),N(G)-dimethylarginine dimethylaminohydrolase 2 OS=Mus musculus OX=10090 GN=Ddah2 PE=1 SV=1	dimethylarginine dimethylaminohydrolase 2	DDAH2	Cytoplasm	enzyme	0	0	154.635	73	11	184	10	1	285	29.6	6.01	2376	11	1	1.288	1.068	7.3e-05	0.140471	89.2	87.6	84.5	113.3	111.3	112.9	114.7	93	93.6	8.2038e+07	8.05492e+07	7.7698e+07	1.04141e+08	1.02317e+08	1.03825e+08	1.05485e+08	8.55816e+07	8.61031e+07
Q3U1J4	DNA damage-binding protein 1 OS=Mus musculus OX=10090 GN=Ddb1 PE=1 SV=2	damage specific DNA binding protein 1	DDB1	Nucleus	other	0	0	163.594	19	17	194	17	1	1140	126.8	5.26	2249	17	0	0.875	0.928	0.660222	0.614365	67.3	103.1	158.1	90.2	77.4	119.4	95.7	85.1	103.6	7.53809e+07	1.15431e+08	1.76467e+08	1.00733e+08	8.64028e+07	1.33737e+08	1.06847e+08	9.49758e+07	1.15786e+08
O88533	Aromatic-L-amino-acid decarboxylase OS=Mus musculus OX=10090 GN=Ddc PE=1 SV=1	dopa decarboxylase	DDC	Cytoplasm	enzyme	0	0	63.155	14	4	26	4	1	480	53.8	6.6	784	4	0	1.198	1.243	0.498693	0.793884	87.8	90.1	100	108	72.2	145.8	112.1	56.8	127.2	4.6892e+06	4.73053e+06	5.25104e+06	5.80387e+06	3.7879e+06	7.6599e+06	5.88362e+06	2.98665e+06	6.67352e+06
Q80YA3	Phospholipase DDHD1 OS=Mus musculus OX=10090 GN=Ddhd1 PE=1 SV=1	DDHD domain containing 1	DDHD1	Extracellular Space	enzyme	0	0.032	2.564	6	1	30	1	1	547	61.8	6.61	0	1	0	1.652	1.932	0.94902	0.711023	159.7	62.7	56.9	141.9	103.6	42.8	155.8	55.4	121.2	136449	53577.7	48618	124151	88513.7	36562	133042	47303.2	109629
A2ADY9	Protein DDI1 homolog 2 OS=Mus musculus OX=10090 GN=Ddi2 PE=1 SV=1	DNA damage inducible 1 homolog 2	DDI2	Plasma Membrane	transporter	0	0	40.664	17	4	36	4	1	399	44.6	5.05	257	4	0	1.416	1.224	0.056765	0.20295	82.1	92.4	82.3	116.5	93.2	121.3	100.7	85.8	125.9	8.43534e+06	9.49771e+06	8.40533e+06	1.20833e+07	9.54997e+06	1.26132e+07	1.03041e+07	8.87485e+06	1.28677e+07
Q80TS7	Dendrin OS=Mus musculus OX=10090 GN=Ddn PE=1 SV=3	dendrin	DDN	Cytoplasm	transcription regulator	0	0.022	2.863	2	1	7	1	1	710	76.4	9.98	14	1	0	1.007	1.386	0.723301	0.364493	61.6	95.6	103	55.6	139.5	96.3	65.6	150.3	132.5	305352	476713	510203	275978	691459	476539	330773	746119	656040
O54734	Dolichyl-diphosphooligosaccharide--protein glycosyltransferase 48 kDa subunit OS=Mus musculus OX=10090 GN=Ddost PE=1 SV=2	dolichyl-diphosphooligosaccharide--protein glycosyltransferase non-catalytic subunit	DDOST	Cytoplasm	enzyme	2	0	180.788	47	14	369	14	1	441	49	5.83	4775	14	0	1.415	1.231	0.0608	0.018154	79	88.8	82.3	116.5	135.9	94.1	101.3	107.2	94.8	1.68602e+08	1.89766e+08	1.75871e+08	2.48947e+08	2.90257e+08	2.01086e+08	2.16709e+08	2.28938e+08	2.02531e+08
Q03146	Epithelial discoidin domain-containing receptor 1 OS=Mus musculus OX=10090 GN=Ddr1 PE=2 SV=2	discoidin domain receptor tyrosine kinase 1	DDR1	Plasma Membrane	kinase	1	0	23.782	5	4	26	4	1	911	101.1	6.58	49	4	0	0.766	1.033	0.101772	0.218031	107.6	84.1	108.7	81.7	82.5	84.9	132.8	111.2	106.4	3.20339e+06	2.56303e+06	3.18043e+06	2.45219e+06	2.45114e+06	2.52989e+06	3.95775e+06	3.33119e+06	3.15272e+06
O35215	D-dopachrome decarboxylase OS=Mus musculus OX=10090 GN=Ddt PE=1 SV=3	D-dopachrome tautomerase	DDT	Cytoplasm	enzyme	0	0	47.769	52	5	41	5	1	118	13.1	6.54	799	5	0	1.167	0.682	0.879493	0.707962	168.2	102.3	39.9	170.4	119.4	45.7	139.5	69.8	44.8	3.70584e+07	2.24784e+07	8.86844e+06	3.76844e+07	2.61792e+07	1.00975e+07	3.07269e+07	1.54529e+07	1.00039e+07
Q91VR5	ATP-dependent RNA helicase DDX1 OS=Mus musculus OX=10090 GN=Ddx1 PE=1 SV=1	DEAD-box helicase 1	DDX1	Nucleus	enzyme	0	0	212.287	29	15	173	15	1	740	82.4	7.21	2011	15	0	1.622	0.959	0.00465	0.548128	89.6	66.9	78.6	127.5	147	124.8	116.5	75.4	73.6	3.91864e+07	2.93718e+07	3.52608e+07	5.54452e+07	6.39124e+07	5.49045e+07	5.06557e+07	3.27951e+07	3.28573e+07
Q501J6	Probable ATP-dependent RNA helicase DDX17 OS=Mus musculus OX=10090 GN=Ddx17 PE=1 SV=1	DEAD-box helicase 17	DDX17	Nucleus	enzyme	0	0	112.61	26	16	155	10	1	650	72.4	8.59	2461	16	0	1.258	0.965	0.373228	0.984319	91.8	90.1	106.5	87.5	119.4	115.5	88.6	81.3	119.3	5.26441e+07	5.1713e+07	6.10492e+07	5.01741e+07	6.88479e+07	6.62109e+07	5.09263e+07	4.69882e+07	6.84028e+07
Q61655	ATP-dependent RNA helicase DDX19A OS=Mus musculus OX=10090 GN=Ddx19a PE=1 SV=2	DEAD-box helicase 19A	DDX19A	Nucleus	enzyme	0	0	34.962	12	4	25	3	1	478	53.9	6.67	249	4	1	1.226	1.38	0.497021	0.412136	76.3	112.6	75.1	93.6	162.9	73.9	85.1	115.2	105.3	3.21903e+06	4.58004e+06	3.15975e+06	3.85216e+06	6.66999e+06	3.05667e+06	3.71929e+06	4.73579e+06	4.30065e+06
Q9QY15	ATP-dependent RNA helicase DDX25 OS=Mus musculus OX=10090 GN=Ddx25 PE=1 SV=2	DEAD-box helicase 25	DDX25	Nucleus	enzyme	0	0	14.799	7	2	37	1	1	484	54.8	5.99	44	2	0	0.318	0.496	0.040539	0.58104	115.9	109.6	53.9	30.3	34.8	37	435.3	54.3	28.9	7.9768e+06	7.38366e+06	3.63716e+06	2.13835e+06	2.34844e+06	2.49159e+06	2.94375e+07	3.67296e+06	1.95374e+06
Q921N6	Probable ATP-dependent RNA helicase DDX27 OS=Mus musculus OX=10090 GN=Ddx27 PE=1 SV=3	DEAD-box helicase 27	DDX27	Nucleus	enzyme	0	0.061	2.017	1	1	1	1	1	760	85.9	9.25	0	1	0	0.732	0.789	0.605593	0.604937	40.6	183.9	21.4	17	456.5	29.7	32.1	97.3	21.5	24718.2	114175	13631.4	10350.6	284696	18795.6	20085.2	61412.9	13226.4
Q8VDW0	ATP-dependent RNA helicase DDX39A OS=Mus musculus OX=10090 GN=Ddx39a PE=1 SV=1	DExD-box helicase 39A	DDX39A	Nucleus	enzyme	0	0	79.144	13	5	106	2	1	427	49	5.68	2417	5	0	1.214	1.033	0.130205	0.872423	90	82.2	108.9	109.2	104.7	128	93	88.5	95.4	1.74923e+06	1.59e+06	2.10646e+06	2.11306e+06	2.02878e+06	2.54036e+06	1.81058e+06	1.72311e+06	1.84662e+06
Q9Z1N5	Spliceosome RNA helicase Ddx39b OS=Mus musculus OX=10090 GN=Ddx39b PE=1 SV=1	DExD-box helicase 39B	DDX39B	Nucleus	enzyme	0	0	123.257	23	8	140	5	1	428	49	5.67	3450	8	3	1.131	0.953	0.084504	0.753825	96.1	77.5	99.8	108.6	130.4	105.7	103.3	91.6	87	4.57809e+07	3.7123e+07	4.75823e+07	5.17718e+07	6.21569e+07	5.03568e+07	4.94119e+07	4.36994e+07	4.1456e+07
Q62167	ATP-dependent RNA helicase DDX3X OS=Mus musculus OX=10090 GN=Ddx3x PE=1 SV=3	DEAD-box helicase 3 X-linked	DDX3X	Cytoplasm	enzyme	0	0	351.571	41	26	691	5	1	662	73.1	7.18	12531	26	22	1.168	1.177	0.047691	0.045984	78.8	95	89.7	104.7	113.2	99	114.6	99.3	105.5	2.39441e+08	2.89002e+08	2.72436e+08	3.1806e+08	3.44188e+08	3.01054e+08	3.47546e+08	3.02771e+08	3.20965e+08
Q62095	ATP-dependent RNA helicase DDX3Y OS=Mus musculus OX=10090 GN=Ddx3y PE=1 SV=2	DEAD-box helicase 3 Y-linked	DDX3Y	Cytoplasm	enzyme	0	0	261.643	35	23	448	2	1	658	73.4	7.53	8238	23	0	0.984	1.356	0.997855	0.350151	91.2	109.1	83.1	111.5	89.7	82.3	125.9	123.6	83.7	3.77906e+06	4.50811e+06	3.43692e+06	4.62312e+06	3.72664e+06	3.43654e+06	5.19844e+06	5.14734e+06	3.45562e+06
Q569Z5	Probable ATP-dependent RNA helicase DDX46 OS=Mus musculus OX=10090 GN=Ddx46 PE=1 SV=2	DEAD-box helicase 46	DDX46	Nucleus	enzyme	0	0.004	4.978	2	2	7	2	1	1032	117.4	9.26	46	2	0	1.026	0.982	0.636377	0.968139	112.1	79.6	97.5	100	139.7	80	117.7	95.7	77.7	3.62059e+06	2.57265e+06	3.18905e+06	3.29054e+06	4.51365e+06	2.61342e+06	3.82955e+06	3.15569e+06	2.50904e+06
Q4FZF3	Probable ATP-dependent RNA helicase DDX49 OS=Mus musculus OX=10090 GN=Ddx49 PE=2 SV=1	DEAD-box helicase 49	DDX49	Nucleus	enzyme	0	0.097	1.656	1	1	11	1	1	480	54.1	8.78	26	1	0	1.342	1.342	0.52965	0.387853	102.9	64.6	92.2	123.7	54.7	140.2	123.7	71.1	127.1	630740	394420	572027	754640	335991	855820	754355	433626	786007
Q61656	Probable ATP-dependent RNA helicase DDX5 OS=Mus musculus OX=10090 GN=Ddx5 PE=1 SV=2	DEAD-box helicase 5	DDX5	Nucleus	enzyme	0	0	220.014	40	21	282	15	1	614	69.2	8.92	4730	21	5	1.333	1.167	0.113586	0.061587	83.8	84.5	84.1	112.2	148.1	91.8	108.3	98.2	89	1.63716e+08	1.64792e+08	1.64134e+08	2.18784e+08	2.89233e+08	1.79444e+08	2.11128e+08	1.91573e+08	1.73439e+08
Q6Q899	Probable ATP-dependent RNA helicase DDX58 OS=Mus musculus OX=10090 GN=Ddx58 PE=1 SV=2	DExD/H-box helicase 58	DDX58	Cytoplasm	enzyme	0	0	12.064	4	2	23	2	1	926	105.9	6.65	111	2	0	0.944	1.012	0.657793	0.811703	104.3	125	89.2	139.1	35.2	98.4	88.7	114.5	105.5	3.36053e+06	4.12222e+06	2.95088e+06	4.53332e+06	2.07965e+06	3.17179e+06	2.87523e+06	3.71362e+06	3.41712e+06
Q9DBN9	Probable ATP-dependent RNA helicase DDX59 OS=Mus musculus OX=10090 GN=Ddx59 PE=1 SV=1	DEAD-box helicase 59	DDX59	nucleus	enzyme	0	0.009	4.005	4	2	25	1	1	619	68.2	6.98	158	2	0
P54823	Probable ATP-dependent RNA helicase DDX6 OS=Mus musculus OX=10090 GN=Ddx6 PE=1 SV=1	DEAD-box helicase 6	DDX6	Nucleus	enzyme	0	0	93.568	26	9	81	8	1	483	54.2	8.66	721	9	0	0.996	1.035	0.737507	0.880571	113.4	82	99.2	98.8	96.1	110.6	102.7	87.4	109.9	4.09497e+07	2.96151e+07	3.58509e+07	3.56593e+07	3.4759e+07	3.99826e+07	3.72185e+07	3.15921e+07	3.9648e+07
Q9CQ62	2,4-dienoyl-CoA reductase, mitochondrial OS=Mus musculus OX=10090 GN=Decr1 PE=1 SV=1	2,4-dienoyl-CoA reductase 1	DECR1	Cytoplasm	enzyme	0	0	358.377	67	18	679	18	1	335	36.2	8.95	10527	18	0	0.93	1.296	0.31789	0.004218	95.2	91.2	90.8	96	75.1	84.9	132	118.3	116.5	5.58144e+08	5.34617e+08	5.32846e+08	5.62923e+08	4.39851e+08	4.97411e+08	7.73577e+08	6.94038e+08	6.8387e+08
Q9WV68	Peroxisomal 2,4-dienoyl-CoA reductase OS=Mus musculus OX=10090 GN=Decr2 PE=1 SV=1	2,4-dienoyl-CoA reductase 2	DECR2	Cytoplasm	enzyme	0	0	143.708	46	12	250	12	1	292	31.3	8.81	2542	12	0	1.428	1.103	0.905478	0.628673	50.4	67.5	148.3	60.8	122.3	96.4	67	74.5	212.9	6.49634e+07	8.68896e+07	1.90914e+08	7.8439e+07	1.57866e+08	1.24067e+08	8.62879e+07	9.59172e+07	2.74292e+08
Q99J78	Differentially expressed in FDCP 8 OS=Mus musculus OX=10090 GN=Def8 PE=1 SV=1	differentially expressed in FDCP 8 homolog	DEF8	Other	other	0	0.008	4.144	3	1	2	1	1	448	52.3	6.43	30	1	0	1.102	0.909	0.252315	0.899521	101.1	81.4	104.6	112.4	111.5	97.8	111.2	91.9	88.1	559696	448372	588846	621590	598076	526622	621000	520641	477982
P56386	Beta-defensin 1 OS=Mus musculus OX=10090 GN=Defb1 PE=2 SV=1	defensin beta 1	Defb1	Extracellular Space	other	1	0	19.368	14	1	24	1	1	69	7.7	8.81	219	1	0	2.115	3.097	0.017265	0.022963	66.2	43.3	49.7	131.8	89.1	105.2	167.1	93.4	154.1	4.71074e+06	3.0631e+06	3.51919e+06	9.36064e+06	6.28101e+06	7.43325e+06	1.18188e+07	6.66046e+06	1.10195e+07
O09005	Sphingolipid delta(4)-desaturase DES1 OS=Mus musculus OX=10090 GN=Degs1 PE=1 SV=1	delta 4-desaturase, sphingolipid 1	DEGS1	Plasma Membrane	enzyme	6	0	15.489	5	1	3	1	1	323	38.2	7.77	144	1	0	0.917	0.928	0.255688	0.232323		134.2	146	128.3	132.7	99	128.7	131.1			6.76126e+06	7.35479e+06	6.46363e+06	6.68695e+06	4.98757e+06	6.48302e+06	6.60381e+06
A2RT67	DENN domain-containing protein 3 OS=Mus musculus OX=10090 GN=Dennd3 PE=1 SV=2	DENN domain containing 3	DENND3	Cytoplasm	other	0	0.003	5.173	2	1	11	1	1	1274	143.8	7.53	25	1	0	1.519	1.444	0.290421	0.02695	84.8	79.4	50.7	120.6	175.3	53.4	114.7	119.3	101.8	234253	220569	139821	361762	481472	150508	324578	327704	280829
A6H8H2	DENN domain-containing protein 4C OS=Mus musculus OX=10090 GN=Dennd4c PE=1 SV=1	DENN domain containing 4C	DENND4C	Cytoplasm	other	0	0	24.745	2	2	23	2	1	1906	211.3	6.4	191	2	0	0.992	0.957	0.503586	0.627764	102.2	35.1	124.4	101.4	85.4	146.4	113.6	93.5	97.9	1.88941e+06	657474	2.32204e+06	1.87172e+06	1.57496e+06	2.71109e+06	2.09401e+06	1.72331e+06	1.82338e+06
Q8BH65	Protein DENND6A OS=Mus musculus OX=10090 GN=Dennd6a PE=1 SV=1	DENN domain containing 6A	DENND6A	Cytoplasm	other	0	0	14.58	4	1	9	1	1	605	68.9	7.93	56	1	0	0.849	0.782	0.54484	0.599474	72.4	140.1	117.7	99.9	79.2	108.1	61.8	92	128.9	408807	785849	653677	564052	448092	606533	342157	515965	717623
Q570Y9	DEP domain-containing mTOR-interacting protein OS=Mus musculus OX=10090 GN=Deptor PE=1 SV=2	DEP domain containing MTOR interacting protein	DEPTOR	Cytoplasm	other	0	0.008	4.315	2	1	2	1	1	409	46.1	7.91	41	1	0	0.905	0.977	0.665652	0.590475	112	81.5	128.3	101.4	73.5	120	113.7	60.2	109.4	2.00157e+06	1.45616e+06	2.29742e+06	1.82022e+06	1.31808e+06	2.21901e+06	2.03137e+06	1.09943e+06	1.96896e+06
Q91YP3	Deoxyribose-phosphate aldolase OS=Mus musculus OX=10090 GN=Dera PE=1 SV=1	deoxyribose-phosphate aldolase	DERA	Cytoplasm	enzyme	0	0	72.283	33	8	106	8	1	318	35	8.72	2438	8	0	1.18	0.968	0.773748	0.400025	87	98.1	118.7	72.3	134.8	115.8	95	80.2	98.1	4.29249e+07	4.83146e+07	5.83933e+07	3.55705e+07	6.63074e+07	5.6976e+07	4.6799e+07	3.95117e+07	4.82645e+07
Q99J56	Derlin-1 OS=Mus musculus OX=10090 GN=Derl1 PE=1 SV=1	derlin 1	DERL1	Cytoplasm	other	5	0	15.318	14	3	60	3	1	251	28.8	9.51	353	3	0	1.072	0.984	0.747703	0.498386	90.1	95.5	130.3	79.8	102.4	116.6	86.3	105	94	2.08805e+07	2.22821e+07	3.0232e+07	1.85022e+07	2.37716e+07	2.70382e+07	2.00178e+07	2.43716e+07	2.17907e+07
Q8BNI4	Derlin-2 OS=Mus musculus OX=10090 GN=Derl2 PE=1 SV=2	derlin 2	DERL2	Cytoplasm	other	4	0	15.489	13	1	18	1	1	239	27.6	7.28	54	1	0	1.224	1.166	0.839536	0.867069	88.6	117.2	86.3	119.1	108.4	75.3	103.4	138.8	62.8	4.57996e+06	6.1036e+06	4.52212e+06	6.14865e+06	5.64051e+06	3.92823e+06	5.33512e+06	7.17164e+06	3.25025e+06
P31001	Desmin OS=Mus musculus OX=10090 GN=Des PE=1 SV=3	desmin	DES	Cytoplasm	other	0	0	10.685	11	4	5	3	1	469	53.5	5.27	29	4	0	1.88	2.231	0.244371	0.365956	49.6	53.2	115.2	100	190.8	86.8	118.7	64.3	121.4	243225	286234	560059	485444	927593	421560	576197	315386	589283
Q9Z2A7	Diacylglycerol O-acyltransferase 1 OS=Mus musculus OX=10090 GN=Dgat1 PE=1 SV=1	diacylglycerol O-acyltransferase 1	DGAT1	Cytoplasm	enzyme	8	0.008	4.123	2	1	1	1	1	498	56.8	9.39	35	1	0
Q8BH86	D-glutamate cyclase, mitochondrial OS=Mus musculus OX=10090 GN=Dglucy PE=1 SV=1	D-glutamate cyclase	DGLUCY	Cytoplasm	enzyme	0	0	249.479	42	16	265	16	1	617	66.3	7.09	5018	16	0	1.48	1.211	1.8e-05	0.046594	78.6	80.6	83.1	119.3	116.8	119.6	113.8	97.6	90.6	7.29309e+07	7.48648e+07	7.72326e+07	1.10607e+08	1.084e+08	1.10932e+08	1.05572e+08	9.06596e+07	8.40084e+07
Q8VCH6	Delta(24)-sterol reductase OS=Mus musculus OX=10090 GN=Dhcr24 PE=1 SV=1	24-dehydrocholesterol reductase	DHCR24	Cytoplasm	enzyme	2	0	73.484	21	7	111	7	1	516	60.1	8.16	893	7	0	0.772	0.651	0.483686	0.270269	72.9	119.8	164.5	78	92.5	119.4	78	97	77.9	4.31441e+07	7.16205e+07	9.76158e+07	4.59361e+07	5.44901e+07	7.04299e+07	4.59625e+07	5.73461e+07	4.6032e+07
O88455	7-dehydrocholesterol reductase OS=Mus musculus OX=10090 GN=Dhcr7 PE=1 SV=1	7-dehydrocholesterol reductase	DHCR7	Cytoplasm	enzyme	6	0	12.935	4	2	14	2	1	471	53.9	8.35	204	2	0	0.986	1.743	0.438849	0.0251	62.4	78.9	90.6	132.2	74.6	77.7	142	104.1	137.5	4.54758e+06	5.37506e+06	6.17974e+06	8.98735e+06	5.40446e+06	5.3166e+06	9.65749e+06	7.08888e+06	9.36808e+06
Q99KU1	Dehydrodolichyl diphosphate synthase complex subunit Dhdds OS=Mus musculus OX=10090 GN=Dhdds PE=2 SV=1	dehydrodolichyl diphosphate synthase subunit	DHDDS	Cytoplasm	enzyme	0	0.038	2.354	3	1	1	1	1	333	38.5	8.31	17	1	0	0.978	0.91	0.862995	0.601525	83.8	109.9	120.5	52.9	138.8	107.4	73.2	99.9	113.7	928510	1.21683e+06	1.33444e+06	782263	1.53748e+06	1.18976e+06	909727	1.1069e+06	1.3095e+06
Q9DBB8	Trans-1,2-dihydrobenzene-1,2-diol dehydrogenase OS=Mus musculus OX=10090 GN=Dhdh PE=1 SV=1	dihydrodiol dehydrogenase	DHDH	Other	enzyme	0	0	18.486	17	3	13	3	1	333	36.3	6.44	100	3	0	2.043	1.804	0.098252	0.306039	62.1	17.8	104.6	173.6	98.5	126.8	111.9	54.2	150.6	291004	87356.1	420667	709160	404681	511964	450034	224635	612714
P00375	Dihydrofolate reductase OS=Mus musculus OX=10090 GN=Dhfr PE=1 SV=3	dihydrofolate reductase	DHFR	Nucleus	enzyme	0	0	50.317	30	5	67	5	1	187	21.6	8.53	1058	5	0	1.304	1.071	0.147165	0.521153	107.2	90.3	61.2	117.8	134	98.2	110.8	96.7	83.9	2.63835e+07	2.24869e+07	1.51132e+07	2.89752e+07	3.29692e+07	2.41656e+07	2.73024e+07	2.41426e+07	2.06345e+07
Q99L04	Dehydrogenase/reductase SDR family member 1 OS=Mus musculus OX=10090 GN=Dhrs1 PE=1 SV=1	dehydrogenase/reductase 1	DHRS1	Cytoplasm	enzyme	0	0	227.64	71	19	338	19	1	313	34	8.35	4146	19	0	1.18	1.078	0.207994	0.928458	91.1	83.4	99.3	107.6	147.9	94	98.3	103.9	74.5	1.25775e+08	1.15238e+08	1.37252e+08	1.48426e+08	2.04093e+08	1.3124e+08	1.35618e+08	1.43863e+08	1.03139e+08
Q3U0B3	Dehydrogenase/reductase SDR family member 11 OS=Mus musculus OX=10090 GN=Dhrs11 PE=1 SV=1	dehydrogenase/reductase 11	DHRS11	Extracellular Space	other	1	0	10.092	5	1	3	1	1	260	28.3	6.34	94	1	0	Present in 4h only							405.4	335.2	159.4							885804	1.12962e+06	348170
Q5SS80	Dehydrogenase/reductase SDR family member 13 OS=Mus musculus OX=10090 GN=Dhrs13 PE=1 SV=1	dehydrogenase/reductase 13	DHRS13	Extracellular Space	enzyme	0	0	15.489	4	1	7	1	1	376	40.7	7.93	197	1	0	0.857	0.869	0.911462	0.538981	114.4	43	120.6	102.4	86.6	98	96.9	99.5	138.6	1.10643e+06	414342	1.16264e+06	991183	837481	965463	932105	957122	1.34661e+06
O88876	Short-chain dehydrogenase/reductase 3 OS=Mus musculus OX=10090 GN=Dhrs3 PE=1 SV=2	dehydrogenase/reductase 3	DHRS3	Cytoplasm	enzyme	1	0	61.564	21	5	128	5	1	302	33.6	8.69	1171	5	0	1.072	0.889	0.626307	0.619863	100.7	64.9	133.9	95.6	108	131.5	100.6	89.5	75.2	2.95023e+07	1.90673e+07	3.92285e+07	2.81184e+07	3.16276e+07	3.85049e+07	2.9454e+07	2.62552e+07	2.21686e+07
Q99LB2	Dehydrogenase/reductase SDR family member 4 OS=Mus musculus OX=10090 GN=Dhrs4 PE=1 SV=3	dehydrogenase/reductase 4	DHRS4	Cytoplasm	enzyme	0	0	180.454	44	13	404	13	1	279	29.9	9.38	6543	13	0	1.113	1.47	0.678262	0.376619	125.6	55.1	76.8	126.5	85.5	79.7	159.4	78.7	112.8	2.41523e+08	1.06015e+08	1.47945e+08	2.43238e+08	1.64329e+08	1.53436e+08	3.06434e+08	1.51303e+08	2.17415e+08
Q9CXR1	Dehydrogenase/reductase SDR family member 7 OS=Mus musculus OX=10090 GN=Dhrs7 PE=1 SV=2	dehydrogenase/reductase 7	DHRS7	Other	enzyme	1	0.008	4.212	3	1	3	1	1	338	38.1	8.32	42	1	0	1.285	1.207	0.716204	0.488214	92.9	52.3	118	119.4	50.2	130.6	112.2	67.6	156.8	2.30926e+06	1.33944e+06	2.93439e+06	2.96761e+06	1.3271e+06	3.24823e+06	2.79159e+06	1.73551e+06	3.90573e+06
Q99J47	Dehydrogenase/reductase SDR family member 7B OS=Mus musculus OX=10090 GN=Dhrs7b PE=1 SV=1	dehydrogenase/reductase 7B	DHRS7B	ER	other	1	0	84.508	30	8	69	8	1	323	35	9.63	1801	8	0	0.979	1.113	0.583232	0.632453	82.8	91.3	109.3	89.4	142	87	89	107.6	101.6	2.40305e+07	2.64847e+07	3.18297e+07	2.59205e+07	4.12089e+07	2.53088e+07	2.58488e+07	3.12079e+07	2.94841e+07
A2ATU0	Probable 2-oxoglutarate dehydrogenase E1 component DHKTD1, mitochondrial OS=Mus musculus OX=10090 GN=Dhtkd1 PE=1 SV=1	dehydrogenase E1 and transketolase domain containing 1	DHTKD1	Cytoplasm	enzyme	0	0.001	6.274	5	3	7	3	1	921	102.7	6.9	25	3	0	1.339	1.186	0.996638	0.823477	87	133.9	72.9	116.4	142	34.9	103.1	138.8	71.1	2.3621e+06	3.60327e+06	1.95751e+06	3.13277e+06	3.92262e+06	951753	2.8221e+06	3.72597e+06	1.92724e+06
O35286	Pre-mRNA-splicing factor ATP-dependent RNA helicase DHX15 OS=Mus musculus OX=10090 GN=Dhx15 PE=1 SV=2	DEAH-box helicase 15	DHX15	Nucleus	enzyme	0	0	55.404	12	8	107	8	1	795	90.9	7.46	1779	8	0	1.064	1.027	0.321752	0.664973	91.9	102.4	88.6	97.8	148.8	96.4	94.4	97.8	81.7	3.79811e+07	4.18945e+07	3.62315e+07	3.99819e+07	6.09425e+07	3.9485e+07	3.85482e+07	3.99499e+07	3.33864e+07
Q6PGC1	ATP-dependent RNA helicase DHX29 OS=Mus musculus OX=10090 GN=Dhx29 PE=1 SV=1	DExH-box helicase 29	DHX29	Cytoplasm	enzyme	0	0	11.525	5	2	15	2	1	1365	153.9	7.94	170	2	0	1.275	1.081	0.139176	0.422458	94.7	87	85.7	133.5	111	91.6	118.8	83.5	94.1	936207	851591	834722	1.31707e+06	1.08978e+06	903093	1.17437e+06	826354	917065
O70133	ATP-dependent RNA helicase A OS=Mus musculus OX=10090 GN=Dhx9 PE=1 SV=2	DExH-box helicase 9	DHX9	Nucleus	enzyme	0	0	143.444	11	11	138	11	1	1380	149.4	6.83	2317	11	0	1.646	1.473	0.129121	0.239542	65.2	68.2	104.8	96.8	159.9	112.3	100.5	102	90.5	2.64408e+07	2.76443e+07	4.24017e+07	3.9167e+07	6.46864e+07	4.54392e+07	4.0649e+07	4.12702e+07	3.66381e+07
O08808	Protein diaphanous homolog 1 OS=Mus musculus OX=10090 GN=Diaph1 PE=1 SV=1	diaphanous related formin 1	DIAPH1	Plasma Membrane	other	0	0	93.381	8	7	73	7	1	1255	139.3	5.57	862	7	0	1.292	1.39	0.091678	0.004636	90.1	76.9	82.7	110.7	106.9	87	108.3	115	122.5	5.18977e+06	4.45243e+06	4.76303e+06	6.41202e+06	6.21463e+06	5.03483e+06	6.23899e+06	6.62864e+06	7.05376e+06
O70566	Protein diaphanous homolog 2 OS=Mus musculus OX=10090 GN=Diaph2 PE=1 SV=2	diaphanous related formin 2	Diaph2	Cytoplasm	other	0	0	15.489	1	1	15	1	1	1098	124.8	6.92	727	1	0	0.962	0.926	0.366017	0.219975	97.4	98.8	147.7	95	84.5	109.3	91.5	77.8	98	1.18814e+06	1.19937e+06	1.79417e+06	1.15346e+06	1.02525e+06	1.3295e+06	1.11299e+06	944214	1.18929e+06
Q3UH60	Disco-interacting protein 2 homolog B OS=Mus musculus OX=10090 GN=Dip2b PE=1 SV=1	disco interacting protein 2 homolog B	DIP2B	Cytoplasm	other	0	0	21.344	3	4	20	4	1	1574	171	8.09	137	4	0	1.019	0.913	0.499024	0.820969	65.1	121.7	106.1	101.9	123	108.1	54.5	96.8	122.7	1.81635e+06	3.24691e+06	2.82655e+06	2.71661e+06	3.27978e+06	2.8797e+06	1.46834e+06	2.57878e+06	3.27065e+06
Q9ESX5	H/ACA ribonucleoprotein complex subunit DKC1 OS=Mus musculus OX=10090 GN=Dkc1 PE=1 SV=4	dyskerin pseudouridine synthase 1	DKC1	Nucleus	enzyme	0	0	14.036	4	1	15	1	1	509	57.4	9.28	82	1	0	1.097	1.068	0.33943	0.392754	87.9	32.8	113.9	96.4	94.5	130	93.9	76.8	173.8	1.00276e+06	377405	1.3111e+06	1.09966e+06	1.07778e+06	1.48087e+06	1.07064e+06	893376	1.98346e+06
Q8BMF4	Dihydrolipoyllysine-residue acetyltransferase component of pyruvate dehydrogenase complex, mitochondrial OS=Mus musculus OX=10090 GN=Dlat PE=1 SV=2	dihydrolipoamide S-acetyltransferase	DLAT	Cytoplasm	enzyme	0	0	709.849	52	30	2048	30	1	642	67.9	8.57	37804	30	0	1.618	1.386	0.604456	0.811735	51.7	57.8	148.9	51.4	93.6	208.6	80.2	67	140.8	1.57915e+09	1.76458e+09	4.54096e+09	1.56914e+09	2.85435e+09	6.36344e+09	2.44763e+09	2.04263e+09	4.29326e+09
O08749	Dihydrolipoyl dehydrogenase, mitochondrial OS=Mus musculus OX=10090 GN=Dld PE=1 SV=2	dihydrolipoamide dehydrogenase	DLD	Cytoplasm	enzyme	0	0	446.934	46	18	735	18	1	509	54.2	7.9	13620	18	0	1.077	1.083	0.483818	0.454473	83.6	105.4	95.4	87.8	119.5	102.8	91.3	110.9	103.3	3.98878e+08	5.0369e+08	4.56109e+08	4.1876e+08	5.70227e+08	4.91408e+08	4.35055e+08	5.29952e+08	4.93237e+08
Q811D0	Disks large homolog 1 OS=Mus musculus OX=10090 GN=Dlg1 PE=1 SV=1	discs large MAGUK scaffold protein 1	DLG1	Plasma Membrane	kinase	0	0	200.102	32	19	266	18	1	905	100.1	5.8	4517	19	1	1.233	1.023	0.066065	0.553493	90.3	99.2	78.5	111.3	133.2	103.8	92.4	104.9	86.4	1.31299e+08	1.44183e+08	1.14192e+08	1.61873e+08	1.9375e+08	1.50918e+08	1.34377e+08	1.52601e+08	1.25719e+08
P70175	Disks large homolog 3 OS=Mus musculus OX=10090 GN=Dlg3 PE=1 SV=1	discs large MAGUK scaffold protein 3	DLG3	Plasma Membrane	kinase	0	0	35.49	5	3	29	2	1	849	93.4	6.79	180	3	0	1.278	1.264	0.153013	0.141629	87.8	38	97.1	112.2	93.8	125	111	95.4	139.7	1.04042e+06	448314	1.14909e+06	1.32444e+06	1.12251e+06	1.51865e+06	1.31014e+06	1.13373e+06	1.65439e+06
B1AZP2	Disks large-associated protein 4 OS=Mus musculus OX=10090 GN=Dlgap4 PE=1 SV=1	DLG associated protein 4	DLGAP4	Plasma Membrane	other	0	0.052	2.082	1	1	2	1	1	992	108	7.08	47	1	0	0.723	0.695	0.832952	0.440937	70.6	122.7	114	72.7	177.2	82.4	76.9	104.2	79.2	1.55317e+06	2.698e+06	2.48723e+06	1.58782e+06	3.86525e+06	1.80039e+06	1.68148e+06	2.30024e+06	1.75038e+06
[truncated: 3,326 more rows]
