# Supplementary material for: A multi-hierarchical approach reveals d-serine as a hidden substrate of sodium-coupled monocarboxylate transporters
Source: eLife. 2024 Apr 23;12:RP92615. doi: 10.7554/eLife.92615 (PMC11037918; doi:10.7554/eLife.92615)
Supplement: Supplementary file 2. [file elife-92615-supp2.xlsx]

## Sheet: Table supplement 2
Function Annotation	4h: p-value	4h: Activation z-score	4h: Molecules	4h: Molecule numbers	8h: p-value	8h: Activation z-score	8h: Molecules	8h: Molecule numbers
Transport of micromolecules	3.9e-207	-2.136	ABCA1,ABCA5,ABCA7,ABCB1,ABCB10,ABCB6,ABCB7,ABCB8,ABCB9,ABCC1,ABCC10,ABCC2,ABCC3,ABCC6,ABCD1,ABCD3,ABCG2,ANKH,ANO1,ANO10,ANO3,ANO6,ANXA6,AQP1,AQP2,AQP3,AQP7,ATP11A,ATP11C,ATP13A1,ATP1A1,ATP1A2,ATP1A3,ATP1B1,ATP1B2,ATP1B3,ATP2A1,ATP2A2,ATP2B1,ATP2B2,ATP2B4,ATP2C1,ATP4A,Atp5e,ATP5F1B,ATP5F1D,ATP5IF1,ATP5MG,ATP6AP1,ATP6V0A1,ATP6V0A2,ATP6V0A4,ATP6V0C,ATP6V0D1,ATP6V0D2,ATP6V1A,ATP6V1B2,ATP6V1C1,ATP6V1C…	293	4.9e-208	-0.877	ABCA1,ABCA5,ABCA7,ABCB1,ABCB10,ABCB6,ABCB7,ABCB8,ABCB9,ABCC1,ABCC10,ABCC2,ABCC3,ABCC6,ABCD1,ABCD3,ABCG2,ANKH,ANO1,ANO10,ANO3,ANO6,ANXA6,AQP1,AQP2,AQP3,AQP7,ATP11A,ATP11C,ATP13A1,ATP1A1,ATP1A2,ATP1A3,ATP1B1,ATP1B2,ATP1B3,ATP2A1,ATP2A2,ATP2B1,ATP2B2,ATP2B4,ATP2C1,ATP4A,Atp5e,ATP5F1B,ATP5F1D,ATP5IF1,ATP5MG,ATP6AP1,ATP6V0A1,ATP6V0A2,ATP6V0A4,ATP6V0C,ATP6V0D1,ATP6V0D2,ATP6V1A,ATP6V1B2,ATP6V1C1,ATP6V1C…	294
Transport of ion	9.2e-156	0.041	ABCB1,ABCB8,ABCC1,ABCC2,ABCC3,ANKH,ANO1,ANO10,ANO3,ANO6,ANXA6,AQP1,AQP7,ATP11C,ATP13A1,ATP1A1,ATP1A2,ATP1A3,ATP1B1,ATP1B2,ATP1B3,ATP2A1,ATP2A2,ATP2B1,ATP2B2,ATP2B4,ATP2C1,ATP4A,Atp5e,ATP5F1B,ATP5F1D,ATP5MG,ATP6AP1,ATP6V0A1,ATP6V0A2,ATP6V0A4,ATP6V0C,ATP6V0D1,ATP6V0D2,ATP6V1A,ATP6V1B2,ATP6V1C1,ATP6V1C2,ATP6V1D,ATP6V1E1,ATP6V1F,ATP6V1G1,ATP6V1G3,ATP6V1H,ATP7A,ATP8A1,BSND,CACNA2D1,CFTR,Clca3a1/Clca3a…	175	1.64e-155	0.577	ABCB1,ABCB8,ABCC1,ABCC2,ABCC3,ANKH,ANO1,ANO10,ANO3,ANO6,ANXA6,AQP1,AQP7,ATP11C,ATP13A1,ATP1A1,ATP1A2,ATP1A3,ATP1B1,ATP1B2,ATP1B3,ATP2A1,ATP2A2,ATP2B1,ATP2B2,ATP2B4,ATP2C1,ATP4A,Atp5e,ATP5F1B,ATP5F1D,ATP5MG,ATP6AP1,ATP6V0A1,ATP6V0A2,ATP6V0A4,ATP6V0C,ATP6V0D1,ATP6V0D2,ATP6V1A,ATP6V1B2,ATP6V1C1,ATP6V1C2,ATP6V1D,ATP6V1E1,ATP6V1F,ATP6V1G1,ATP6V1G3,ATP6V1H,ATP7A,ATP8A1,BSND,CACNA2D1,CFTR,Clca3a1/Clca3a…	175
Transport of cation	6.51e-82	-0.251	ABCB1,ABCB8,ABCC1,ANO1,ANO10,ANO6,ANXA6,AQP1,ATP1A1,ATP1A2,ATP1A3,ATP1B1,ATP1B2,ATP1B3,ATP2A1,ATP2A2,ATP2B1,ATP2B2,ATP2B4,ATP2C1,ATP4A,Atp5e,ATP5F1B,ATP5F1D,ATP5MG,ATP6V0A4,ATP6V1E1,ATP7A,CACNA2D1,CNNM2,CNNM4,FXYD1,FXYD4,HEPH,HVCN1,ITPR1,ITPR2,KCNB1,KCNJ1,KCNJ10,KCNJ15,KCNJ16,KCNK2,KCNQ1,LETM1,LRP2,MCOLN2,MMGT1,ORAI1,P2RX1,P2RX4,P2RX7,PIEZO1,PKD2,RHAG,RHCE/RHD,RHCG,SCNN1A,SCNN1G,SFXN1,SLC10A2,SLC…	105	8.78e-82	-0.132	ABCB1,ABCB8,ABCC1,ANO1,ANO10,ANO6,ANXA6,AQP1,ATP1A1,ATP1A2,ATP1A3,ATP1B1,ATP1B2,ATP1B3,ATP2A1,ATP2A2,ATP2B1,ATP2B2,ATP2B4,ATP2C1,ATP4A,Atp5e,ATP5F1B,ATP5F1D,ATP5MG,ATP6V0A4,ATP6V1E1,ATP7A,CACNA2D1,CNNM2,CNNM4,FXYD1,FXYD4,HEPH,HVCN1,ITPR1,ITPR2,KCNB1,KCNJ1,KCNJ10,KCNJ15,KCNJ16,KCNK2,KCNQ1,LETM1,LRP2,MCOLN2,MMGT1,ORAI1,P2RX1,P2RX4,P2RX7,PIEZO1,PKD2,RHAG,RHCE/RHD,RHCG,SCNN1A,SCNN1G,SFXN1,SLC10A2,SLC…	105
Transport of metal	8.4e-62	-1.078	ABCB10,ABCB7,ABCB8,ABCC1,ABCG2,ANO6,ANXA6,AQP1,ATP1A1,ATP1A2,ATP1A3,ATP1B1,ATP1B2,ATP1B3,ATP2A1,ATP2A2,ATP2B1,ATP2B2,ATP2B4,ATP2C1,ATP6AP1,ATP6V0A2,ATP6V0D1,ATP6V1A,ATP6V1G1,ATP7A,CACNA2D1,CNNM2,CNNM4,EPB42,FXYD1,HEPH,HPX,ITPR1,ITPR2,KCNB1,KCNJ1,KCNJ10,KCNJ15,KCNJ16,KCNK2,KCNQ1,LCN2,LETM1,LRP2,MCOLN2,MMGT1,ORAI1,P2RX4,P2RX7,PKD2,RHAG,RHCE/RHD,SCNN1A,SCNN1G,SFXN1,SLC10A2,SLC11A2,SLC12A1,SLC12A2,SL…	91	1.08e-61	-0.109	ABCB10,ABCB7,ABCB8,ABCC1,ABCG2,ANO6,ANXA6,AQP1,ATP1A1,ATP1A2,ATP1A3,ATP1B1,ATP1B2,ATP1B3,ATP2A1,ATP2A2,ATP2B1,ATP2B2,ATP2B4,ATP2C1,ATP6AP1,ATP6V0A2,ATP6V0D1,ATP6V1A,ATP6V1G1,ATP7A,CACNA2D1,CNNM2,CNNM4,EPB42,FXYD1,HEPH,HPX,ITPR1,ITPR2,KCNB1,KCNJ1,KCNJ10,KCNJ15,KCNJ16,KCNK2,KCNQ1,LCN2,LETM1,LRP2,MCOLN2,MMGT1,ORAI1,P2RX4,P2RX7,PKD2,RHAG,RHCE/RHD,SCNN1A,SCNN1G,SFXN1,SLC10A2,SLC11A2,SLC12A1,SLC12A2,SL…	91
Transport of inorganic cation	1.86e-63	-0.084	ABCB8,ANO6,ANXA6,AQP1,ATP1A1,ATP1A2,ATP1A3,ATP1B1,ATP1B2,ATP1B3,ATP2A1,ATP2A2,ATP2B1,ATP2B2,ATP2B4,ATP2C1,ATP4A,Atp5e,ATP5F1B,ATP5F1D,ATP5MG,ATP6V0A4,ATP6V1E1,ATP7A,CACNA2D1,CNNM2,CNNM4,FXYD1,FXYD4,HEPH,HVCN1,ITPR1,ITPR2,KCNB1,KCNJ1,KCNJ10,KCNJ15,KCNJ16,KCNK2,KCNQ1,LETM1,LRP2,MCOLN2,MMGT1,ORAI1,P2RX4,P2RX7,PKD2,RHAG,SCNN1A,SCNN1G,SFXN1,SLC10A2,SLC11A2,SLC12A1,SLC12A2,SLC12A3,SLC13A1,SLC23A1,SLC30…	87	2.36e-63	0.478	ABCB8,ANO6,ANXA6,AQP1,ATP1A1,ATP1A2,ATP1A3,ATP1B1,ATP1B2,ATP1B3,ATP2A1,ATP2A2,ATP2B1,ATP2B2,ATP2B4,ATP2C1,ATP4A,Atp5e,ATP5F1B,ATP5F1D,ATP5MG,ATP6V0A4,ATP6V1E1,ATP7A,CACNA2D1,CNNM2,CNNM4,FXYD1,FXYD4,HEPH,HVCN1,ITPR1,ITPR2,KCNB1,KCNJ1,KCNJ10,KCNJ15,KCNJ16,KCNK2,KCNQ1,LETM1,LRP2,MCOLN2,MMGT1,ORAI1,P2RX4,P2RX7,PKD2,RHAG,SCNN1A,SCNN1G,SFXN1,SLC10A2,SLC11A2,SLC12A1,SLC12A2,SLC12A3,SLC13A1,SLC23A1,SLC30…	87
Transport of metal ion	1.83e-51	0.142	ABCB8,ANO6,ANXA6,AQP1,ATP1A1,ATP1A2,ATP1A3,ATP1B1,ATP1B2,ATP1B3,ATP2A1,ATP2A2,ATP2B1,ATP2B2,ATP2B4,ATP2C1,ATP7A,CACNA2D1,CNNM2,CNNM4,FXYD1,HEPH,ITPR1,ITPR2,KCNB1,KCNJ1,KCNJ10,KCNJ15,KCNJ16,KCNK2,KCNQ1,LETM1,LRP2,MCOLN2,MMGT1,ORAI1,P2RX4,P2RX7,PKD2,SCNN1A,SCNN1G,SFXN1,SLC10A2,SLC11A2,SLC12A1,SLC12A2,SLC12A3,SLC13A1,SLC23A1,SLC30A1,SLC30A5,SLC30A7,SLC31A1,SLC34A1,SLC34A3,SLC38A7,SLC39A6,SLC39A8,SLC…	74	2.23e-51	0.771	ABCB8,ANO6,ANXA6,AQP1,ATP1A1,ATP1A2,ATP1A3,ATP1B1,ATP1B2,ATP1B3,ATP2A1,ATP2A2,ATP2B1,ATP2B2,ATP2B4,ATP2C1,ATP7A,CACNA2D1,CNNM2,CNNM4,FXYD1,HEPH,ITPR1,ITPR2,KCNB1,KCNJ1,KCNJ10,KCNJ15,KCNJ16,KCNK2,KCNQ1,LETM1,LRP2,MCOLN2,MMGT1,ORAI1,P2RX4,P2RX7,PKD2,SCNN1A,SCNN1G,SFXN1,SLC10A2,SLC11A2,SLC12A1,SLC12A2,SLC12A3,SLC13A1,SLC23A1,SLC30A1,SLC30A5,SLC30A7,SLC31A1,SLC34A1,SLC34A3,SLC38A7,SLC39A6,SLC39A8,SLC…	74
Transport of anion	8.2e-55	0.159	ABCC1,ABCC2,ABCC3,ANKH,ANO1,ANO10,ANO6,AQP1,AQP7,BSND,CFTR,Clca3a1/Clca3a2,CLCC1,CLCN3,CLCN4,CLCN5,CLCNKA,CLIC1,CLIC4,CLIC5,FXYD1,LRRC8A,LRRC8C,RHAG,SLC12A1,SLC12A2,SLC12A3,SLC12A4,SLC12A7,SLC13A1,SLC17A1,SLC19A1,SLC1A1,SLC22A18,SLC22A24,SLC22A6,SLC22A7,SLC25A10,SLC26A1,SLC26A11,SLC26A4,SLC26A6,SLC34A1,SLC34A3,SLC39A8,SLC4A1,SLC4A2,SLC4A4,SLC4A7,SLC9A3R1,Slco1a1,SLCO2B1,SLCO4C1,TTYH3,VDAC1,VDAC2	56	9.54e-55	0.237	ABCC1,ABCC2,ABCC3,ANKH,ANO1,ANO10,ANO6,AQP1,AQP7,BSND,CFTR,Clca3a1/Clca3a2,CLCC1,CLCN3,CLCN4,CLCN5,CLCNKA,CLIC1,CLIC4,CLIC5,FXYD1,LRRC8A,LRRC8C,RHAG,SLC12A1,SLC12A2,SLC12A3,SLC12A4,SLC12A7,SLC13A1,SLC17A1,SLC19A1,SLC1A1,SLC22A18,SLC22A24,SLC22A6,SLC22A7,SLC25A10,SLC26A1,SLC26A11,SLC26A4,SLC26A6,SLC34A1,SLC34A3,SLC39A8,SLC4A1,SLC4A2,SLC4A4,SLC4A7,SLC9A3R1,Slco1a1,SLCO2B1,SLCO4C1,TTYH3,VDAC1,VDAC2	56
Transport of monovalent inorganic cation	8.56e-40	0.142	ABCB8,ANO6,AQP1,ATP1A1,ATP1A2,ATP1A3,ATP1B1,ATP1B2,ATP1B3,ATP4A,Atp5e,ATP5F1B,ATP5F1D,ATP5MG,ATP6V0A4,ATP6V1E1,FXYD1,FXYD4,HVCN1,KCNB1,KCNJ1,KCNJ10,KCNJ15,KCNJ16,KCNK2,KCNQ1,P2RX4,P2RX7,PKD2,RHAG,SCNN1A,SCNN1G,SLC10A2,SLC11A2,SLC12A1,SLC12A2,SLC12A3,SLC13A1,SLC23A1,SLC34A1,SLC34A3,SLC36A1,SLC38A7,SLC46A1,SLC4A4,Slc5a4a,SLC8A1,SLC8B1,SLC9A1,SLC9A3,SLC9A8,TMEM175,TPCN1	53	9.83e-40	-0.616	ABCB8,ANO6,AQP1,ATP1A1,ATP1A2,ATP1A3,ATP1B1,ATP1B2,ATP1B3,ATP4A,Atp5e,ATP5F1B,ATP5F1D,ATP5MG,ATP6V0A4,ATP6V1E1,FXYD1,FXYD4,HVCN1,KCNB1,KCNJ1,KCNJ10,KCNJ15,KCNJ16,KCNK2,KCNQ1,P2RX4,P2RX7,PKD2,RHAG,SCNN1A,SCNN1G,SLC10A2,SLC11A2,SLC12A1,SLC12A2,SLC12A3,SLC13A1,SLC23A1,SLC34A1,SLC34A3,SLC36A1,SLC38A7,SLC46A1,SLC4A4,Slc5a4a,SLC8A1,SLC8B1,SLC9A1,SLC9A3,SLC9A8,TMEM175,TPCN1	53
Transport of lipid	4.79e-40	-2.239	ABCA1,ABCA5,ABCA7,ABCB1,ABCC1,ABCC10,ABCC2,ABCC3,ABCC6,ABCD1,ABCD3,ABCG2,ANO6,ATP11A,ATP11C,ATP8A1,CFTR,FABP3,FABP4,LDLR,MTTP,NPC1,OSBP,P2RX7,PITPNA,PITPNB,SCARB1,SCP2,SLC10A2,SLC13A2,SLC13A3,Slc22a22,SLC22A24,SLC22A8,SLC25A10,SLC25A13,SLC27A1,SLC27A2,SLC27A4,SLC36A1,SLC51A,SLC51B,SLC6A13,SLC6A6,SLC9A3R1,SLC9A3R2,Slco1a1,SLCO2A1,SLCO3A1,STARD3,STARD5,TMEM30A,TMEM30B	53	3.44e-41	-0.816	ABCA1,ABCA5,ABCA7,ABCB1,ABCC1,ABCC10,ABCC2,ABCC3,ABCC6,ABCD1,ABCD3,ABCG2,ANO6,ATP11A,ATP11C,ATP8A1,CFTR,FABP3,FABP4,LDLR,MTTP,NPC1,OSBP,OSBPL8,P2RX7,PITPNA,PITPNB,SCARB1,SCP2,SLC10A2,SLC13A2,SLC13A3,Slc22a22,SLC22A24,SLC22A8,SLC25A10,SLC25A13,SLC27A1,SLC27A2,SLC27A4,SLC36A1,SLC51A,SLC51B,SLC6A13,SLC6A6,SLC9A3R1,SLC9A3R2,Slco1a1,SLCO2A1,SLCO3A1,STARD3,STARD5,TMEM30A,TMEM30B	54
Transport of carboxylic acid	4.45e-57	-1.534	ABCB10,ABCC1,ABCC10,ABCC2,ABCC3,ABCC6,ABCD1,ABCD3,ABCG2,ATP1A2,FABP3,FABP4,NPC1,SCP2,SFXN5,SLC13A2,SLC13A3,SLC16A1,SLC16A2,SLC16A7,SLC17A1,SLC17A5,Slc22a22,SLC22A6,SLC22A8,SLC23A1,SLC23A2,Slc25a1,SLC25A10,SLC25A11,SLC25A13,SLC26A1,SLC26A6,SLC27A1,SLC27A2,SLC27A4,SLC2A1,SLC2A2,SLC2A3,SLC2A8,SLC36A1,SLC5A6,SLC5A8,SLC6A13,SLC6A6,SLC9A3R1,Slco1a1,SLCO2A1,SLCO2B1,SLCO3A1	50	5.1e-57	-0.389	ABCB10,ABCC1,ABCC10,ABCC2,ABCC3,ABCC6,ABCD1,ABCD3,ABCG2,ATP1A2,FABP3,FABP4,NPC1,SCP2,SFXN5,SLC13A2,SLC13A3,SLC16A1,SLC16A2,SLC16A7,SLC17A1,SLC17A5,Slc22a22,SLC22A6,SLC22A8,SLC23A1,SLC23A2,Slc25a1,SLC25A10,SLC25A11,SLC25A13,SLC26A1,SLC26A6,SLC27A1,SLC27A2,SLC27A4,SLC2A1,SLC2A2,SLC2A3,SLC2A8,SLC36A1,SLC5A6,SLC5A8,SLC6A13,SLC6A6,SLC9A3R1,Slco1a1,SLCO2A1,SLCO2B1,SLCO3A1	50
Transport of amino acids	1.07e-35	-2.25	ABCC1,ABCC2,ABCC3,ABCG2,ATP5IF1,KCNJ10,LRRC8A,LRRC8C,SFXN1,SLC13A3,SLC15A4,SLC16A10,SLC16A12,SLC16A2,SLC19A1,SLC1A1,SLC1A5,SLC25A12,SLC25A13,SLC25A15,SLC25A22,SLC36A1,SLC38A9,SLC3A1,SLC3A2,SLC43A1,SLC43A2,SLC46A1,SLC5A6,SLC6A13,SLC6A18,SLC6A19,SLC6A6,SLC6A8,SLC7A1,SLC7A7,SLC7A8,SLC7A9,SLC9A3R1	39	1.19e-35	-1.078	ABCC1,ABCC2,ABCC3,ABCG2,ATP5IF1,KCNJ10,LRRC8A,LRRC8C,SFXN1,SLC13A3,SLC15A4,SLC16A10,SLC16A12,SLC16A2,SLC19A1,SLC1A1,SLC1A5,SLC25A12,SLC25A13,SLC25A15,SLC25A22,SLC36A1,SLC38A9,SLC3A1,SLC3A2,SLC43A1,SLC43A2,SLC46A1,SLC5A6,SLC6A13,SLC6A18,SLC6A19,SLC6A6,SLC6A8,SLC7A1,SLC7A7,SLC7A8,SLC7A9,SLC9A3R1	39
Transport of inorganic anion	9.1e-37	0.14	ABCC1,ANKH,ANO1,ANO10,ANO6,AQP7,BSND,CFTR,Clca3a1/Clca3a2,CLCC1,CLCN3,CLCN4,CLCN5,CLCNKA,CLIC1,CLIC4,CLIC5,FXYD1,SLC12A1,SLC12A2,SLC12A3,SLC12A4,SLC12A7,SLC13A1,SLC17A1,SLC1A1,SLC25A10,SLC26A1,SLC26A11,SLC26A4,SLC26A6,SLC34A1,SLC34A3,SLC4A1,SLC4A2,SLC9A3R1,TTYH3	37	1e-36	0.219	ABCC1,ANKH,ANO1,ANO10,ANO6,AQP7,BSND,CFTR,Clca3a1/Clca3a2,CLCC1,CLCN3,CLCN4,CLCN5,CLCNKA,CLIC1,CLIC4,CLIC5,FXYD1,SLC12A1,SLC12A2,SLC12A3,SLC12A4,SLC12A7,SLC13A1,SLC17A1,SLC1A1,SLC25A10,SLC26A1,SLC26A11,SLC26A4,SLC26A6,SLC34A1,SLC34A3,SLC4A1,SLC4A2,SLC9A3R1,TTYH3	37
Transport of divalent cations	3e-25	-0.283	ANO6,ANXA6,ATP2A1,ATP2A2,ATP2B1,ATP2B2,ATP2B4,ATP2C1,ATP7A,CACNA2D1,CNNM2,CNNM4,ITPR1,ITPR2,LETM1,MCOLN2,MMGT1,ORAI1,P2RX4,P2RX7,PKD2,SLC11A2,SLC30A1,SLC30A5,SLC30A7,SLC31A1,SLC39A6,SLC39A8,SLC8A1,SLC8B1,TMCO1,TRPC6,TRPV2,TRPV4,TRPV5,VDAC1	36	3.29e-25	1.392	ANO6,ANXA6,ATP2A1,ATP2A2,ATP2B1,ATP2B2,ATP2B4,ATP2C1,ATP7A,CACNA2D1,CNNM2,CNNM4,ITPR1,ITPR2,LETM1,MCOLN2,MMGT1,ORAI1,P2RX4,P2RX7,PKD2,SLC11A2,SLC30A1,SLC30A5,SLC30A7,SLC31A1,SLC39A6,SLC39A8,SLC8A1,SLC8B1,TMCO1,TRPC6,TRPV2,TRPV4,TRPV5,VDAC1	36
Transport of heavy metal	3.14e-22	-1.438	ABCB10,ABCB7,ABCB8,ABCC1,ABCG2,ATP2C1,ATP6AP1,ATP6V0A2,ATP6V0D1,ATP6V1A,ATP6V1G1,ATP7A,EPB42,HEPH,HPX,LCN2,MMGT1,RHAG,RHCE/RHD,SLC11A2,SLC30A1,SLC30A5,SLC30A7,SLC31A1,SLC39A10,SLC39A6,SLC39A7,SLC39A8,SLC46A1,TF,TFRC	31	3.39e-22	-0.735	ABCB10,ABCB7,ABCB8,ABCC1,ABCG2,ATP2C1,ATP6AP1,ATP6V0A2,ATP6V0D1,ATP6V1A,ATP6V1G1,ATP7A,EPB42,HEPH,HPX,LCN2,MMGT1,RHAG,RHCE/RHD,SLC11A2,SLC30A1,SLC30A5,SLC30A7,SLC31A1,SLC39A10,SLC39A6,SLC39A7,SLC39A8,SLC46A1,TF,TFRC	31
Transport of Na+	8.6e-24	0.537	ANO6,ATP1A1,ATP1A2,ATP1A3,ATP1B1,ATP1B3,FXYD1,P2RX4,P2RX7,PKD2,SCNN1A,SCNN1G,SLC10A2,SLC12A1,SLC12A2,SLC12A3,SLC13A1,SLC23A1,SLC34A1,SLC34A3,SLC38A7,SLC4A4,SLC8A1,SLC8B1,SLC9A1,SLC9A3,SLC9A8,TPCN1	28	9.24e-24	-0.418	ANO6,ATP1A1,ATP1A2,ATP1A3,ATP1B1,ATP1B3,FXYD1,P2RX4,P2RX7,PKD2,SCNN1A,SCNN1G,SLC10A2,SLC12A1,SLC12A2,SLC12A3,SLC13A1,SLC23A1,SLC34A1,SLC34A3,SLC38A7,SLC4A4,SLC8A1,SLC8B1,SLC9A1,SLC9A3,SLC9A8,TPCN1	28
Transport of carbohydrate	1.72e-16	-1.23	ABCA1,ABCB1,AQP1,AQP2,AQP3,AQP7,ATP7A,NPC1,SCARB1,SLC16A1,SLC17A5,SLC23A1,SLC23A2,SLC25A33,SLC2A1,SLC2A2,SLC2A3,SLC2A4,SLC2A5,SLC2A8,SLC35A3,SLC50A1,SLC5A1,SLC5A10,SLC5A11,SLC5A2,SLC5A3,SLC5A9	28	2.01e-17	-0.726	ABCA1,ABCB1,AQP1,AQP2,AQP3,AQP7,ATP7A,NPC1,OSBPL8,SCARB1,SLC16A1,SLC17A5,SLC23A1,SLC23A2,SLC25A33,SLC2A1,SLC2A2,SLC2A3,SLC2A4,SLC2A5,SLC2A8,SLC35A3,SLC50A1,SLC5A1,SLC5A10,SLC5A11,SLC5A2,SLC5A3,SLC5A9	29
Transport of halide	1.03e-27		ANO1,ANO10,ANO6,BSND,CFTR,Clca3a1/Clca3a2,CLCC1,CLCN3,CLCN4,CLCN5,CLCNKA,CLIC1,CLIC4,CLIC5,FXYD1,SLC12A1,SLC12A2,SLC12A3,SLC12A4,SLC12A7,SLC1A1,SLC26A1,SLC26A4,SLC26A6,SLC4A1,SLC4A2,TTYH3	27	1.11e-27		ANO1,ANO10,ANO6,BSND,CFTR,Clca3a1/Clca3a2,CLCC1,CLCN3,CLCN4,CLCN5,CLCNKA,CLIC1,CLIC4,CLIC5,FXYD1,SLC12A1,SLC12A2,SLC12A3,SLC12A4,SLC12A7,SLC1A1,SLC26A1,SLC26A4,SLC26A6,SLC4A1,SLC4A2,TTYH3	27
Transport of monovalent inorganic anion	2.16e-27		ANO1,ANO10,ANO6,BSND,CFTR,Clca3a1/Clca3a2,CLCC1,CLCN3,CLCN4,CLCN5,CLCNKA,CLIC1,CLIC4,CLIC5,FXYD1,SLC12A1,SLC12A2,SLC12A3,SLC12A4,SLC12A7,SLC1A1,SLC26A1,SLC26A4,SLC26A6,SLC4A1,SLC4A2,TTYH3	27	2.32e-27		ANO1,ANO10,ANO6,BSND,CFTR,Clca3a1/Clca3a2,CLCC1,CLCN3,CLCN4,CLCN5,CLCNKA,CLIC1,CLIC4,CLIC5,FXYD1,SLC12A1,SLC12A2,SLC12A3,SLC12A4,SLC12A7,SLC1A1,SLC26A1,SLC26A4,SLC26A6,SLC4A1,SLC4A2,TTYH3	27
Transport of chloride	4.78e-27		ANO1,ANO10,ANO6,BSND,CFTR,Clca3a1/Clca3a2,CLCC1,CLCN3,CLCN4,CLCN5,CLCNKA,CLIC1,CLIC4,CLIC5,FXYD1,SLC12A1,SLC12A2,SLC12A3,SLC12A4,SLC12A7,SLC1A1,SLC26A1,SLC26A6,SLC4A1,SLC4A2,TTYH3	26	5.11e-27		ANO1,ANO10,ANO6,BSND,CFTR,Clca3a1/Clca3a2,CLCC1,CLCN3,CLCN4,CLCN5,CLCNKA,CLIC1,CLIC4,CLIC5,FXYD1,SLC12A1,SLC12A2,SLC12A3,SLC12A4,SLC12A7,SLC1A1,SLC26A1,SLC26A6,SLC4A1,SLC4A2,TTYH3	26
Transport of fatty acid	4.15e-28	-1.402	ABCC1,ABCC2,ABCC3,ABCC6,ABCD1,ABCD3,ABCG2,FABP3,FABP4,NPC1,SCP2,SLC13A2,SLC13A3,Slc22a22,SLC25A10,SLC25A13,SLC27A1,SLC27A2,SLC27A4,SLC36A1,SLC6A13,SLC6A6,SLC9A3R1,Slco1a1,SLCO2A1,SLCO3A1	26	4.44e-28	0.187	ABCC1,ABCC2,ABCC3,ABCC6,ABCD1,ABCD3,ABCG2,FABP3,FABP4,NPC1,SCP2,SLC13A2,SLC13A3,Slc22a22,SLC25A10,SLC25A13,SLC27A1,SLC27A2,SLC27A4,SLC36A1,SLC6A13,SLC6A6,SLC9A3R1,Slco1a1,SLCO2A1,SLCO3A1	26
Transport of Ca2+	2.16e-16	0.15	ANO6,ANXA6,ATP2A1,ATP2A2,ATP2B1,ATP2B2,ATP2B4,ATP2C1,CACNA2D1,ITPR1,ITPR2,LETM1,MCOLN2,ORAI1,P2RX4,P2RX7,PKD2,SLC8A1,SLC8B1,TMCO1,TRPC6,TRPV2,TRPV4,TRPV5,VDAC1	25	2.3e-16	1.994	ANO6,ANXA6,ATP2A1,ATP2A2,ATP2B1,ATP2B2,ATP2B4,ATP2C1,CACNA2D1,ITPR1,ITPR2,LETM1,MCOLN2,ORAI1,P2RX4,P2RX7,PKD2,SLC8A1,SLC8B1,TMCO1,TRPC6,TRPV2,TRPV4,TRPV5,VDAC1	25
Transport of steroid	7.54e-16	-1.658	ABCA1,ABCA5,ABCA7,ABCB1,ABCC2,ABCC3,CFTR,FABP4,LDLR,MTTP,NPC1,OSBP,SCARB1,SCP2,SLC10A2,SLC22A24,SLC22A8,SLC51A,SLC51B,SLC9A3R1,SLC9A3R2,Slco1a1,STARD3,STARD5	24	8e-16	-1.246	ABCA1,ABCA5,ABCA7,ABCB1,ABCC2,ABCC3,CFTR,FABP4,LDLR,MTTP,NPC1,OSBP,SCARB1,SCP2,SLC10A2,SLC22A24,SLC22A8,SLC51A,SLC51B,SLC9A3R1,SLC9A3R2,Slco1a1,STARD3,STARD5	24
Transport of K+	2.55e-13		ABCB8,AQP1,ATP1A1,ATP1A2,ATP1A3,ATP1B1,ATP1B2,ATP1B3,KCNB1,KCNJ1,KCNJ10,KCNJ15,KCNJ16,KCNK2,KCNQ1,PKD2,SLC12A1,SLC12A2,SLC9A8,TMEM175	20	2.68e-13		ABCB8,AQP1,ATP1A1,ATP1A2,ATP1A3,ATP1B1,ATP1B2,ATP1B3,KCNB1,KCNJ1,KCNJ10,KCNJ15,KCNJ16,KCNK2,KCNQ1,PKD2,SLC12A1,SLC12A2,SLC9A8,TMEM175	20
Transport of L-amino acid	1.29e-18	-0.831	KCNJ10,LRRC8A,LRRC8C,SFXN1,SLC13A3,SLC15A4,SLC16A10,SLC1A1,SLC1A5,SLC25A12,SLC25A13,SLC25A15,SLC25A22,SLC36A1,SLC43A1,SLC43A2,SLC7A1,SLC7A8	18	1.35e-18	0.192	KCNJ10,LRRC8A,LRRC8C,SFXN1,SLC13A3,SLC15A4,SLC16A10,SLC1A1,SLC1A5,SLC25A12,SLC25A13,SLC25A15,SLC25A22,SLC36A1,SLC43A1,SLC43A2,SLC7A1,SLC7A8	18
Transport of sterol	2.51e-10	-1.453	ABCA1,ABCA5,ABCA7,ABCB1,CFTR,FABP4,LDLR,MTTP,NPC1,OSBP,SCARB1,SCP2,SLC22A24,SLC9A3R1,SLC9A3R2,STARD3,STARD5	17	2.61e-10	-0.946	ABCA1,ABCA5,ABCA7,ABCB1,CFTR,FABP4,LDLR,MTTP,NPC1,OSBP,SCARB1,SCP2,SLC22A24,SLC9A3R1,SLC9A3R2,STARD3,STARD5	17
Transport of phospholipid	1.29e-16	-1.587	ABCA1,ABCA7,ABCB1,ABCC1,ANO6,ATP11A,ATP11C,ATP8A1,LDLR,MTTP,NPC1,P2RX7,PITPNA,PITPNB,SCARB1,TMEM30A,TMEM30B	17	5.38e-18	-2.203	ABCA1,ABCA7,ABCB1,ABCC1,ANO6,ATP11A,ATP11C,ATP8A1,LDLR,MTTP,NPC1,OSBPL8,P2RX7,PITPNA,PITPNB,SCARB1,TMEM30A,TMEM30B	18
Transport of hydrogen	2.74e-17		ATP1A2,ATP4A,Atp5e,ATP5F1B,ATP5F1D,ATP5MG,ATP6V0A4,ATP6V1E1,CFTR,HVCN1,SLC11A2,SLC36A1,SLC46A1,Slc5a4a,SLC9A1,SLC9A3	16	2.85e-17		ATP1A2,ATP4A,Atp5e,ATP5F1B,ATP5F1D,ATP5MG,ATP6V0A4,ATP6V1E1,CFTR,HVCN1,SLC11A2,SLC36A1,SLC46A1,Slc5a4a,SLC9A1,SLC9A3	16
Transport of H+	5.77e-16		ATP1A2,ATP4A,Atp5e,ATP5F1B,ATP5F1D,ATP5MG,ATP6V0A4,ATP6V1E1,HVCN1,SLC11A2,SLC36A1,SLC46A1,Slc5a4a,SLC9A1,SLC9A3	15	6e-16		ATP1A2,ATP4A,Atp5e,ATP5F1B,ATP5F1D,ATP5MG,ATP6V0A4,ATP6V1E1,HVCN1,SLC11A2,SLC36A1,SLC46A1,Slc5a4a,SLC9A1,SLC9A3	15
Transport of amine	8.23e-14	-0.583	ABCB1,ABCC1,ABCG2,SLC18A2,SLC22A1,SLC22A2,SLC22A4,SLC22A5,SLC22A8,SLC25A20,SLC44A1,SLC44A2,SLC44A4,SLC6A4	14	8.53e-14	0.037	ABCB1,ABCC1,ABCG2,SLC18A2,SLC22A1,SLC22A2,SLC22A4,SLC22A5,SLC22A8,SLC25A20,SLC44A1,SLC44A2,SLC44A4,SLC6A4	14
Transport of vitamin	4.01e-17	-1.605	ABCA1,ABCC1,ABCC3,ABCG2,SCARB1,SLC19A1,SLC19A3,SLC22A1,SLC23A1,SLC23A2,SLC27A1,SLC46A1,SLC5A6,TCN2	14	4.16e-17	-0.673	ABCA1,ABCC1,ABCC3,ABCG2,SCARB1,SLC19A1,SLC19A3,SLC22A1,SLC23A1,SLC23A2,SLC27A1,SLC46A1,SLC5A6,TCN2	14
Transport of acidic amino acid	6.85e-17	-1.758	ABCC1,ABCC2,ABCC3,ABCG2,KCNJ10,LRRC8A,LRRC8C,SLC13A3,SLC19A1,SLC1A1,SLC25A12,SLC25A13,SLC25A22,SLC46A1	14	7.11e-17	-0.289	ABCC1,ABCC2,ABCC3,ABCG2,KCNJ10,LRRC8A,LRRC8C,SLC13A3,SLC19A1,SLC1A1,SLC25A12,SLC25A13,SLC25A22,SLC46A1	14
Transport of nitrogenous base	6.85e-17	-2.599	ABCB10,ABCC2,ABCG2,SLC17A1,SLC19A3,SLC22A1,SLC22A12,SLC22A13,SLC23A1,SLC23A2,SLC29A1,SLC29A3,SLCO2B1,VDAC3	14	7.11e-17	-1.97	ABCB10,ABCC2,ABCG2,SLC17A1,SLC19A3,SLC22A1,SLC22A12,SLC22A13,SLC23A1,SLC23A2,SLC29A1,SLC29A3,SLCO2B1,VDAC3	14
Transport of transition metal ion	7.81e-13		ATP7A,HEPH,MMGT1,SFXN1,SLC11A2,SLC30A1,SLC30A5,SLC30A7,SLC31A1,SLC39A6,SLC39A8,TF,TFRC	13	8.07e-13		ATP7A,HEPH,MMGT1,SFXN1,SLC11A2,SLC30A1,SLC30A5,SLC30A7,SLC31A1,SLC39A6,SLC39A8,TF,TFRC	13
Transport of monosaccharide	6.23e-05	0.233	SLC16A1,SLC2A1,SLC2A2,SLC2A3,SLC2A4,SLC2A5,SLC2A8,SLC50A1,SLC5A1,SLC5A10,SLC5A2,SLC5A9	12	1.37e-05	-0.182	OSBPL8,SLC16A1,SLC2A1,SLC2A2,SLC2A3,SLC2A4,SLC2A5,SLC2A8,SLC50A1,SLC5A1,SLC5A10,SLC5A2,SLC5A9	13
Transport of peptide	7.87e-15		ABCB1,ABCB9,ABCC1,ABCC6,ABCG2,SLC13A3,SLC15A2,SLC22A8,SLC25A11,SLC9A3R1,TAP1	11	8.1e-15		ABCB1,ABCB9,ABCC1,ABCC6,ABCG2,SLC13A3,SLC15A2,SLC22A8,SLC25A11,SLC9A3R1,TAP1	11
Transport of glutamine family amino acid	3.36e-10		KCNJ10,SLC1A1,SLC1A5,SLC25A12,SLC25A13,SLC25A15,SLC25A22,SLC36A1,SLC3A1,SLC7A1,SLC7A8	11	3.45e-10		KCNJ10,SLC1A1,SLC1A5,SLC25A12,SLC25A13,SLC25A15,SLC25A22,SLC36A1,SLC3A1,SLC7A1,SLC7A8	11
Transport of alkyl sulfonic acid	5.32e-14	-0.64	ABCC3,LRRC8A,LRRC8C,SLC10A2,SLC22A8,SLC36A1,SLC51A,SLC51B,SLC6A13,SLC6A6,Slco1a1	11	5.48e-14	-0.64	ABCC3,LRRC8A,LRRC8C,SLC10A2,SLC22A8,SLC36A1,SLC51A,SLC51B,SLC6A13,SLC6A6,Slco1a1	11
Transport of organic anion	2.52e-13		ABCC1,ABCC2,ABCC3,SLC19A1,SLC22A24,SLC22A6,SLC22A7,Slco1a1,SLCO2B1,SLCO4C1	10	2.59e-13		ABCC1,ABCC2,ABCC3,SLC19A1,SLC22A24,SLC22A6,SLC22A7,Slco1a1,SLCO2B1,SLCO4C1	10
Transport of organic cation	6.63e-12	-1.172	ABCB1,SLC22A1,SLC22A2,SLC22A4,SLC22A5,SLC25A20,SLC44A1,SLC44A2,SLC44A4,SLC47A1	10	6.8e-12	-1.172	ABCB1,SLC22A1,SLC22A2,SLC22A4,SLC22A5,SLC25A20,SLC44A1,SLC44A2,SLC44A4,SLC47A1	10
Transport of bicarbonate	6.09e-09		AQP1,CFTR,RHAG,SLC26A6,SLC39A8,SLC4A1,SLC4A2,SLC4A4,SLC4A7	9	6.23e-09		AQP1,CFTR,RHAG,SLC26A6,SLC39A8,SLC4A1,SLC4A2,SLC4A4,SLC4A7	9
Transport of dicarboxylic acid	1.62e-11		SLC13A2,SLC13A3,SLC22A6,SLC25A10,SLC25A11,SLC25A13,SLC26A1,SLC26A6	8	1.65e-11		SLC13A2,SLC13A3,SLC22A6,SLC25A10,SLC25A11,SLC25A13,SLC26A1,SLC26A6	8
Transport of monocarboxylic acid	2.22e-10		ATP1A2,SLC16A1,SLC16A2,SLC16A7,SLC26A6,SLC5A6,SLC5A8,SLC6A13	8	2.27e-10		ATP1A2,SLC16A1,SLC16A2,SLC16A7,SLC26A6,SLC5A6,SLC5A8,SLC6A13	8
Transport of sugar acid	4.09e-11		SLC17A5,SLC23A1,SLC23A2,SLC2A1,SLC2A2,SLC2A3,SLC2A8	7	4.17e-11		SLC17A5,SLC23A1,SLC23A2,SLC2A1,SLC2A2,SLC2A3,SLC2A8	7
Transport of sulfate	5.61e-10		SLC13A1,SLC25A10,SLC26A1,SLC26A11,SLC26A4,SLC26A6,SLC4A1	7	5.71e-10		SLC13A1,SLC25A10,SLC26A1,SLC26A11,SLC26A4,SLC26A6,SLC4A1	7
Transport of drug	5.61e-10		ABCC2,ABCC3,ABCG2,SLC22A1,SLC22A2,TFRC,TMEM30A	7	5.71e-10		ABCC2,ABCC3,ABCG2,SLC22A1,SLC22A2,TFRC,TMEM30A	7
Transport of neutral amino acid	9.64e-08		SLC1A5,SLC36A1,SLC3A2,SLC43A1,SLC6A19,SLC7A8,SLC7A9	7	9.81e-08		SLC1A5,SLC36A1,SLC3A2,SLC43A1,SLC6A19,SLC7A8,SLC7A9	7
Transport of long chain fatty acid	4.04e-07	0.284	ABCD1,ABCD3,FABP3,FABP4,NPC1,SLC27A1,SLC27A4	7	4.11e-07	0.284	ABCD1,ABCD3,FABP3,FABP4,NPC1,SLC27A1,SLC27A4	7
Transport of bile acid	1.32e-07	-0.728	ABCC2,ABCC3,SLC10A2,SLC22A8,SLC51A,SLC51B,Slco1a1	7	1.34e-07	-0.728	ABCC2,ABCC3,SLC10A2,SLC22A8,SLC51A,SLC51B,Slco1a1	7
Transport of eicosanoid	2.63e-10	-1.483	ABCC1,ABCC2,ABCC3,ABCC6,Slc22a22,SLCO2A1,SLCO3A1	7	2.67e-10	0.809	ABCC1,ABCC2,ABCC3,ABCC6,Slc22a22,SLCO2A1,SLCO3A1	7
Transport of pyrimidine base	3.38e-08	-2.19	ABCB10,ABCC2,ABCG2,SLC19A3,SLC22A1,SLC29A1,SLCO2B1	7	3.44e-08	-1.452	ABCB10,ABCC2,ABCG2,SLC19A3,SLC22A1,SLC29A1,SLCO2B1	7
Transport of purine base	5.78e-08		ABCG2,SLC17A1,SLC22A12,SLC22A13,SLC29A3,VDAC3	6	5.87e-08		ABCG2,SLC17A1,SLC22A12,SLC22A13,SLC29A3,VDAC3	6
Transport of L-aspartic acid	1.74e-09		LRRC8A,LRRC8C,SLC13A3,SLC1A1,SLC25A12,SLC25A13	6	1.76e-09		LRRC8A,LRRC8C,SLC13A3,SLC1A1,SLC25A12,SLC25A13	6
Transport of polyols	1.83e-08		AQP1,AQP2,AQP3,AQP7,SLC5A11,SLC5A3	6	1.86e-08		AQP1,AQP2,AQP3,AQP7,SLC5A11,SLC5A3	6
Transport of oligopeptide	5.78e-08		ABCC1,SLC13A3,SLC15A2,SLC22A8,SLC25A11,SLC9A3R1	6	5.87e-08		ABCC1,SLC13A3,SLC15A2,SLC22A8,SLC25A11,SLC9A3R1	6
Transport of iron ion	2.28e-07		HEPH,MMGT1,SFXN1,SLC11A2,TF,TFRC	6	2.32e-07		HEPH,MMGT1,SFXN1,SLC11A2,TF,TFRC	6
Transport of water	3.37e-07		AQP1,AQP2,AQP3,AQP7,CFTR,SLC14A1	6	3.43e-07		AQP1,AQP2,AQP3,AQP7,CFTR,SLC14A1	6
Transport of phosphate	2.91e-06		ANKH,SLC17A1,SLC25A10,SLC34A1,SLC34A3,SLC9A3R1	6	2.96e-06		ANKH,SLC17A1,SLC25A10,SLC34A1,SLC34A3,SLC9A3R1	6
Transport of neurotransmitter	2.74e-05		SLC18A2,SLC22A1,SLC22A2,SLC29A1,SLC6A13,SLC6A4	6	2.78e-05		SLC18A2,SLC22A1,SLC22A2,SLC29A1,SLC6A13,SLC6A4	6
Transport of taurocholic acid	2.28e-07	-0.64	ABCC3,SLC10A2,SLC22A8,SLC51A,SLC51B,Slco1a1	6	2.32e-07	-0.64	ABCC3,SLC10A2,SLC22A8,SLC51A,SLC51B,Slco1a1	6
Transport of methotrexate	5.87e-10	-1.474	ABCC1,ABCC2,ABCC3,ABCG2,SLC19A1,SLC46A1	6	5.96e-10	-0.78	ABCC1,ABCC2,ABCC3,ABCG2,SLC19A1,SLC46A1	6
Transport of dehydroascorbic acid	2.66e-08		SLC23A1,SLC2A1,SLC2A2,SLC2A3,SLC2A8	5	2.69e-08		SLC23A1,SLC2A1,SLC2A2,SLC2A3,SLC2A8	5
Transport of ammonium	2.66e-08		AQP1,RHAG,RHCE/RHD,RHCG,SLC12A2	5	2.69e-08		AQP1,RHAG,RHCE/RHD,RHCG,SLC12A2	5
Transport of taurine	2.66e-08		LRRC8A,LRRC8C,SLC36A1,SLC6A13,SLC6A6	5	2.69e-08		LRRC8A,LRRC8C,SLC36A1,SLC6A13,SLC6A6	5
Transport of choline	1.55e-07		SLC22A1,SLC22A2,SLC44A1,SLC44A2,SLC44A4	5	1.57e-07		SLC22A1,SLC22A2,SLC44A1,SLC44A2,SLC44A4	5
Transport of glutathione	3.06e-07		ABCC1,SLC13A3,SLC22A8,SLC25A11,SLC9A3R1	5	3.1e-07		ABCC1,SLC13A3,SLC22A8,SLC25A11,SLC9A3R1	5
Transport of hormone	3.4e-06		ABCB1,ABCC2,SLC16A10,SLC16A2,SLC7A8	5	3.44e-06		ABCB1,ABCC2,SLC16A10,SLC16A2,SLC7A8	5
Transport of serine family amino acid	9.3e-06		SFXN1,SLC1A1,SLC1A5,SLC36A1,SLC7A8	5	9.42e-06		SFXN1,SLC1A1,SLC1A5,SLC36A1,SLC7A8	5
Transport of basic amino acid	1.25e-05		SLC15A4,SLC25A15,SLC3A1,SLC7A1,SLC7A7	5	1.26e-05		SLC15A4,SLC25A15,SLC3A1,SLC7A1,SLC7A7	5
Transport of L-glutamic acid	1.64e-05		KCNJ10,SLC1A1,SLC25A12,SLC25A13,SLC25A22	5	1.66e-05		KCNJ10,SLC1A1,SLC25A12,SLC25A13,SLC25A22	5
Transport of Zn2+	2.12e-05		SLC30A1,SLC30A5,SLC30A7,SLC39A6,SLC39A8	5	2.15e-05		SLC30A1,SLC30A5,SLC30A7,SLC39A6,SLC39A8	5
Transport of prostaglandin	7.83e-08		ABCC2,Slc22a22,SLCO2A1,SLCO3A1	4	7.91e-08		ABCC2,Slc22a22,SLCO2A1,SLCO3A1	4
Transport of Co2+	3.86e-07		MMGT1,SLC11A2,SLC30A5,SLC39A8	4	3.9e-07		MMGT1,SLC11A2,SLC30A5,SLC39A8	4
Transport of C4-dicarboxylic acid	3.86e-07		SLC13A2,SLC13A3,SLC25A10,SLC25A13	4	3.9e-07		SLC13A2,SLC13A3,SLC25A10,SLC25A13	4
Transport of D-fructose	3.86e-07		SLC2A2,SLC2A5,SLC2A8,SLC5A10	4	3.9e-07		SLC2A2,SLC2A5,SLC2A8,SLC5A10	4
Transport of beta amino acid	3.86e-07		SLC36A1,SLC5A6,SLC6A13,SLC6A6	4	3.9e-07		SLC36A1,SLC5A6,SLC6A13,SLC6A6	4
Transport of uric acid	2.63e-06		ABCG2,SLC17A1,SLC22A12,SLC22A13	4	2.66e-06		ABCG2,SLC17A1,SLC22A12,SLC22A13	4
Transport of urea	2.63e-06		AQP3,AQP7,SLC14A1,SLC14A2	4	2.66e-06		AQP3,AQP7,SLC14A1,SLC14A2	4
Transport of leukotriene C4	2.63e-06		ABCC1,ABCC2,ABCC3,ABCC6	4	2.66e-06		ABCC1,ABCC2,ABCC3,ABCC6	4
Transport of glycerol	5.19e-06		AQP1,AQP2,AQP3,AQP7	4	5.25e-06		AQP1,AQP2,AQP3,AQP7	4
Transport of thyroid hormone	4.96e-05		ABCC2,SLC16A10,SLC16A2,SLC7A8	4	5.01e-05		ABCC2,SLC16A10,SLC16A2,SLC7A8	4
Transport of GABA	4.96e-05		SLC36A1,SLC6A13,SLC6A6,SLC9A3R1	4	5.01e-05		SLC36A1,SLC6A13,SLC6A6,SLC9A3R1	4
Transport of glycosides	4.96e-05		ABCB1,ATP7A,SLC25A33,SLC35A3	4	5.01e-05		ABCB1,ATP7A,SLC25A33,SLC35A3	4
Transport of Cu2+	6.86e-05		ATP7A,MMGT1,SLC11A2,SLC31A1	4	6.93e-05		ATP7A,MMGT1,SLC11A2,SLC31A1	4
Transport of essential amino acids	6.86e-05		SLC15A4,SLC16A10,SLC25A15,SLC7A1	4	6.93e-05		SLC15A4,SLC16A10,SLC25A15,SLC7A1	4
Transport of palmitic acid	3.48e-05	0.647	FABP3,FABP4,SLC27A1,SLC27A4	4	3.52e-05	0.647	FABP3,FABP4,SLC27A1,SLC27A4	4
Transport of SN-38	7.83e-08	-1.987	ABCB1,ABCC1,ABCC2,ATP7A	4	7.91e-08	-0.132	ABCB1,ABCC1,ABCC2,ATP7A	4
Transport of rosuvastatin	5.19e-06	-2	ABCB10,ABCC2,ABCG2,SLCO2B1	4	5.25e-06	-1	ABCB10,ABCC2,ABCG2,SLCO2B1	4
Transport of biotin	4.7e-06		ABCG2,SLC27A1,SLC5A6	3	4.73e-06		ABCG2,SLC27A1,SLC5A6	3
Transport of irinotecan	4.7e-06		ABCB1,ABCC1,ABCC2	3	4.73e-06		ABCB1,ABCC1,ABCC2	3
Transport of creatine	4.7e-06		SLC16A12,SLC6A13,SLC6A8	3	4.73e-06		SLC16A12,SLC6A13,SLC6A8	3
Transport of cerivastatin	1.86e-05		ABCB1,ABCC2,ABCG2	3	1.87e-05		ABCB1,ABCC2,ABCG2	3
Transport of succinic acid	1.86e-05		SLC13A2,SLC13A3,SLC25A10	3	1.87e-05		SLC13A2,SLC13A3,SLC25A10	3
Transport of beta-alanine	1.86e-05		SLC36A1,SLC6A13,SLC6A6	3	1.87e-05		SLC36A1,SLC6A13,SLC6A6	3
Transport of citric acid	4.58e-05		SFXN5,SLC13A3,Slc25a1	3	4.62e-05		SFXN5,SLC13A3,Slc25a1	3
