# Supplementary material for: A multi-hierarchical approach reveals d-serine as a hidden substrate of sodium-coupled monocarboxylate transporters
Source: eLife. 2024 Apr 23;12:RP92615. doi: 10.7554/eLife.92615 (PMC11037918; doi:10.7554/eLife.92615)
Supplement: Supplementary file 3. [file elife-92615-supp3.xlsx]

## Sheet: Table supplement 3
Transporter	Accession	Peptides	PSMs	Score Mascot	Abundance
SLC1A3/EAAT1	P43003	1	4	167	12000000
SLC1A5/ASCT2	Q15758	5	15	221	168000000
SLC3A2/4F2hc	J3KPF3	15	46	815	362000000
SLC6A15/B0AT2	Q9H2J7	2	2	46	12800000
SLC7A1/CAT1	B2R728	2	7	83	49400000
SLC7A6/y+LAT2	Q92536	1	1	31	7150000
SLC38A2/SNAT2	A8K6H9	1	2	88	28200000
SLC38A9/SNAT9	Q8NBW4	1	1	0	13300000
